# Supplementary material for: CSPG4 expression in soft tissue sarcomas is associated with poor prognosis and low cytotoxic immune response
Source: J Transl Med. 2022 Oct 11;20:464. doi: 10.1186/s12967-022-03679-y (PMC9552405; doi:10.1186/s12967-022-03679-y)
Supplement: Supplementary file 1 — Additional file 1: Table S1. (File format .xls). List of soft tissue sarcoma data sets included. [file 12967_2022_3679_MOESM1_ESM.xlsx]

## Sheet: Supp Table 1
Supplementary Table 1: List of soft tissue sarcoma data sets included
Reference	Source of data	Technological platform	N° of probe sets/genes	All samples	STS primary tumor samples included in the present analysis
Baird K et al., Cancer Res 2005	GEO database, GSE2553	Homemade, spotted DNA/cDNA	12K	181	145
Barretina J et al., Nat Genet 2010	GEO database, GSE21124	Affymetrix, array U133 A	22K	158	126
Beck A et al., Oncogene 2010	GEO database, GSE17555	Stanford, spotted DNA/cDNA	24K	51	21
Chibon F et al., Nat. Med. 2010	GEO database, GSE21050	Affymetrix, array U133 Plus 2.0	54K	310	310
Detwiller K et al., Cancer Res 2005	GEO database, GSE2719	Affymetrix, array U133 A	22K	54	37
Gibault L et al., J Pathol 2011	GEO database, GSE23980	Affymetrix, array U133 Plus 2.0	54K	171	140
Gobble R et al., Cancer Res 2011	GEO database, GSE30929	Affymetrix, array U133 A	22K	140	34
Hadju M et al., J Pathol 2010	http://cbio.mskcc.org/public/SFT/	Affymetrix, array U133 Plus 2.0	54K	56	30
Henderson S et al., Genome Biology 2005	Array Express database, E-MEXP-353	Affymetrix, array U133 A	22K	96	42
Nakayama R et al., Modern Pathol 2007	GEO database, GSE6481	Affymetrix, array U133 A	22K	105	99
Nielsen TO et al., Lancet 2002	GEO database, GSE3443	Stanford, spotted DNA/cDNA	24K	46	31
Renner M et al., Genome Biol 2013	GEO database, GSE52392	Illumina, array Human HT-12 V3.0	48K	94	79
TCGA, Cell 2017	TCGA portal, https://tcga-data.nci.nih.gov	Illumina, RNA sequencing V2	25K	265	224
West R et al., PLoS Biology 2005	http://microarray-pubs.stanford.edu/tma-portal/DTF_SFTbreast	Stanford, spotted DNA/cDNA	24K	57	29
Ylipää A et al., Cancer 2011	http://www3.mdanderson.org/~genomics/sarcoma_data_matrix_for_supplemental.zip	Agilent, array 44K G4112A (012391)	44K	68	31
Total					1,378
