# Supplementary material for: CSPG4 expression in soft tissue sarcomas is associated with poor prognosis and low cytotoxic immune response
Source: J Transl Med. 2022 Oct 11;20:464. doi: 10.1186/s12967-022-03679-y (PMC9552405; doi:10.1186/s12967-022-03679-y)
Supplement: Supplementary file 9 — Additional file 9: Table S4. (File format .xls). Ontologies associated with the 379 genes differentially expressed between the “CSPG4-high” and “CSPG4-low” tumors. [file 12967_2022_3679_MOESM9_ESM.xlsx]

## Sheet: Table S4
Table S4: Ontologies associated with the 379 genes differentially expressed between the "CSPG4-high" and "CSPG4-low" tumors.
			up CSPG4 high vs. low			down CSPG4 high vs. low
Base	TermsID	N	Genes	p-value	q-value	N	Genes	p-value	q-value
GO_BP	GO:0006936_MUSCLE_CONTRACTION	23	SYNM,MYLK,ACTG2,MYL9,SORBS1,LMOD1,TPM2,MYH11,SLC6A8,SLMAP,ACTA2,GJC1,CNN1,EDNRA,KCNH2,FLNA,CKMT2,CASQ2,DTNA,PPP1R12B,MYOCD,ACTC1,DES	1.01183e-11	9.67646e-09
GO_BP	GO:0003012_MUSCLE_SYSTEM_PROCESS	25	SYNM,MYLK,ACTG2,MYL9,SORBS1,LMOD1,TPM2,MYH11,SLC6A8,SLMAP,ACTA2,GJC1,CNN1,EDNRA,KCNH2,FLNA,CKMT2,CASQ2,DTNA,PPP1R12B,MYOCD,HEY2,FBXO32,ACTC1,DES	2.77392e-11	1.59168e-08
GO_BP	GO:0030029_ACTIN_FILAMENT_BASED_PROCESS	31	SPECC1,DAAM2,CSRP2,ACTN1,DIXDC1,SORBS1,CSRP1,LMOD1,TPM2,NTF3,MYH11,SHROOM3,EMP2,GJC1,CNN1,CDC42EP3,KCNH2,FLNA,CASQ2,PGM5,LDB3,CAP2,MYH10,PAWR,BAIAP2L1,TMSB15A,PDLIM3,NRK,ACTC1,CYFIP2,DES	2.31544e-09	8.30374e-07
GO_BP	GO:0090131_MESENCHYME_MIGRATION	3	ACTG2,ACTA2,ACTC1	1.10898e-07	1.87157e-05
GO_BP	GO:0038063_COLLAGEN_ACTIVATED_TYROSINE_KINASE_RECEPTOR_SIGNALING_PATHWAY	4	COL4A2,COL4A6,COL4A5,COL4A1	1.17857e-07	1.87851e-05
GO_BP	GO:0038065_COLLAGEN_ACTIVATED_SIGNALING_PATHWAY	4	COL4A2,COL4A6,COL4A5,COL4A1	4.9551e-07	7.1081e-05
GO_BP	GO:0006600_CREATINE_METABOLIC_PROCESS	3	SLC6A8,CKB,CKMT2	7.6134e-07	0.00010008
GO_BP	GO:0007169_TRANSMEMBRANE_RECEPTOR_PROTEIN_TYROSINE_KINASE_SIGNALING_PATHWAY	25	CSPG4,SORT1,SORBS1,GPC1,NTF3,COL4A2,KALRN,RPE65,EMILIN1,COL4A6,COL4A5,COL4A1,ENPP1,CAV2,ANGPT1,GHR,FGFR2,MYOCD,SEMA6A,TNMD,BAIAP2L1,ADIPOQ,CYFIP2,GREM1,MMP9	7.67434e-07	0.00010008
GO_BP	GO:0097305_RESPONSE_TO_ALCOHOL	13	KCNMB1,PRKAA2,FGFR2,GGH,TNC,GNAI1,CDH1,INHBA,ADIPOQ,MAOB,CA3,ACTC1,CES1	8.98694e-07	0.000112102
GO_BP	GO:0007010_CYTOSKELETON_ORGANIZATION	37	IQCJ-SCHIP1,SPECC1,SYNM,DAAM2,CSRP2,ACTN1,DIXDC1,SORBS1,CSRP1,KIFC2,LMOD1,TPM2,NTF3,MYH11,EPPK1,SHROOM3,EMP2,CNN1,CDC42EP3,FLNA,CASQ2,CAPN6,PRKAA2,SEMA6A,PGM5,LDB3,GNAI1,CAP2,MYH10,PAWR,BAIAP2L1,TMSB15A,PDLIM3,NRK,ACTC1,CYFIP2,DES	1.64256e-06	0.000174537
GO_BP	GO:2000722_REGULATION_OF_CARDIAC_VASCULAR_SMOOTH_MUSCLE_CELL_DIFFERENTIATION	2	MYOCD,HEY2	1.84275e-06	0.000188816
GO_BP	GO:0042493_RESPONSE_TO_DRUG	16	PPP1R14A,WFDC1,LPL,KCNK3,KCNH2,AK4,PRKAA2,GGH,BCHE,ADIRF,CDH1,INHBA,PRKAR2B,ADIPOQ,MAOB,ACTC1	6.76666e-06	0.000582646
GO_BP	GO:0006599_PHOSPHAGEN_METABOLIC_PROCESS	2	CKB,CKMT2	7.30383e-06	0.000598705
GO_BP	GO:0097306_CELLULAR_RESPONSE_TO_ALCOHOL	7	KCNMB1,PRKAA2,TNC,GNAI1,CDH1,INHBA,CES1	1.08667e-05	0.000866018
GO_BP	GO:1900120_REGULATION_OF_RECEPTOR_BINDING	4	PTPRF,LDOC1,ADIPOQ,MMP9	1.17731e-05	0.000912897
GO_BP	GO:0051764_ACTIN_CROSSLINK_FORMATION	3	ACTN1,FLNA,BAIAP2L1	1.4673e-05	0.00110781
GO_BP	GO:0005978_GLYCOGEN_BIOSYNTHETIC_PROCESS	5	SORBS1,PPP1R3B,GYG2,ENPP1,PPP1R3C	1.55827e-05	0.00111767
GO_BP	GO:0045471_RESPONSE_TO_ETHANOL	8	KCNMB1,FGFR2,GGH,TNC,ADIPOQ,MAOB,CA3,ACTC1	1.77878e-05	0.00118527
GO_BP	GO:1901228_POSITIVE_REGULATION_OF_TRANSCRIPTION_FROM_RNA_POLYMERASE_II_PROMOTER_INVOLVED_IN_HEART_DEVELOPMENT	2	MYOCD,GREM1	1.80932e-05	0.00118527
GO_BP	GO:0035989_TENDON_DEVELOPMENT	2	TNMD,COL11A1	1.80932e-05	0.00118527
GO_BP	GO:0035987_ENDODERMAL_CELL_DIFFERENTIATION	5	COL4A2,ITGA7,INHBA,MMP9,COL11A1	2.0257e-05	0.00126885
GO_BP	GO:0001886_ENDOTHELIAL_CELL_MORPHOGENESIS	3	COL15A1,ARHGEF26,TNMD	2.0344e-05	0.00126885
GO_BP	GO:1901652_RESPONSE_TO_PEPTIDE	18	SORT1,SORBS1,RPE65,LPL,LDOC1,ACVR1C,CA2,ENPP1,CAV2,GHR,PCK1,GGH,ANO1,GNAI1,BAIAP2L1,PRKAR2B,ADIPOQ,MMP9	2.33285e-05	0.00142403
GO_BP	GO:0006073_CELLULAR_GLUCAN_METABOLIC_PROCESS	6	SORBS1,PPP1R3B,GYG2,ENPP1,PPP1R3C,PPP1R1A	2.42861e-05	0.0014516
GO_BP	GO:0010962_REGULATION_OF_GLUCAN_BIOSYNTHETIC_PROCESS	4	SORBS1,PPP1R3B,ENPP1,PPP1R3C	2.52797e-05	0.00148015
GO_BP	GO:0007567_PARTURITION	3	KALRN,LDOC1,NRK	2.74743e-05	0.00157647
GO_BP	GO:0007528_NEUROMUSCULAR_JUNCTION_DEVELOPMENT	5	KALRN,COL4A5,COL4A1,TNC,PDZRN3	3.29843e-05	0.0018251
GO_BP	GO:0021869_FOREBRAIN_VENTRICULAR_ZONE_PROGENITOR_CELL_DIVISION	2	DIXDC1,FGFR2	3.5857e-05	0.0018251
GO_BP	GO:2001016_POSITIVE_REGULATION_OF_SKELETAL_MUSCLE_CELL_DIFFERENTIATION	2	GPC1,RBM24	3.5857e-05	0.0018251
GO_BP	GO:0055012_VENTRICULAR_CARDIAC_MUSCLE_CELL_DIFFERENTIATION	3	MYOCD,HEY2,MYH10	3.62792e-05	0.0018251
GO_BP	GO:0034330_CELL_JUNCTION_ORGANIZATION	21	PTPRF,CD9,ACTN1,TANC1,SORBS1,MPP7,KALRN,ADGRL1,FBLIM1,COL4A5,COL4A1,GJC1,FLNA,NFASC,GPC4,TNC,PDZRN3,MYH10,CDH1,ADGRL3,GREM1	5.22225e-05	0.0023782
GO_BP	GO:0001706_ENDODERM_FORMATION	5	COL4A2,ITGA7,INHBA,MMP9,COL11A1	5.71683e-05	0.00251389
GO_BP	GO:0001655_UROGENITAL_SYSTEM_DEVELOPMENT	13	COL4A1,ACTA2,CA2,ANGPT1,ITGA8,FGFR2,MYOCD,SDC1,TNC,EYA1,ADIPOQ,GREM1,MMP9	5.91388e-05	0.00251389
GO_BP	GO:0045650_NEGATIVE_REGULATION_OF_MACROPHAGE_DIFFERENTIATION	2	INHBA,ADIPOQ	6.21787e-05	0.00251389
GO_BP	GO:0030913_PARANODAL_JUNCTION_ASSEMBLY	2	CD9,NFASC	6.21787e-05	0.00251389
GO_BP	GO:2001046_POSITIVE_REGULATION_OF_INTEGRIN_MEDIATED_SIGNALING_PATHWAY	2	EMP2,FLNA	6.21787e-05	0.00251389
GO_BP	GO:0051388_POSITIVE_REGULATION_OF_NEUROTROPHIN_TRK_RECEPTOR_SIGNALING_PATHWAY	2	NTF3,CYFIP2	6.21787e-05	0.00251389
GO_BP	GO:0000902_CELL_MORPHOGENESIS	27	VLDLR,PLXNA4,ACTN1,GPC1,NTF3,KALRN,FBLIM1,SHROOM3,ITGA7,CDC42EP3,LHX2,FLNA,SOX6,NFASC,COL15A1,SEMA6D,ITGA8,FGFR2,SEMA6A,ARHGEF26,CAP2,MYH10,TNMD,MATN2,NRK,CYFIP2,GREM1	6.22121e-05	0.00251389
GO_BP	GO:0070873_REGULATION_OF_GLYCOGEN_METABOLIC_PROCESS	4	SORBS1,PPP1R3B,ENPP1,PPP1R3C	6.5072e-05	0.00259294
GO_BP	GO:0007015_ACTIN_FILAMENT_ORGANIZATION	15	ACTN1,SORBS1,LMOD1,TPM2,SHROOM3,EMP2,CDC42EP3,FLNA,CAP2,PAWR,BAIAP2L1,TMSB15A,PDLIM3,ACTC1,CYFIP2	7.45631e-05	0.00276053
GO_BP	GO:0071404_CELLULAR_RESPONSE_TO_LOW_DENSITY_LIPOPROTEIN_PARTICLE_STIMULUS	3	CD9,LPL,CES1	7.5051e-05	0.00276053
GO_BP	GO:1904706_NEGATIVE_REGULATION_OF_VASCULAR_ASSOCIATED_SMOOTH_MUSCLE_CELL_PROLIFERATION	3	CNN1,MYOCD,ADIPOQ	7.5051e-05	0.00276053
GO_BP	GO:2001014_REGULATION_OF_SKELETAL_MUSCLE_CELL_DIFFERENTIATION	3	GPC1,MYOCD,RBM24	7.5051e-05	0.00276053
GO_BP	GO:0030048_ACTIN_FILAMENT_BASED_MOVEMENT	8	TPM2,EMP2,GJC1,KCNH2,FLNA,MYH10,ACTC1,DES	8.78887e-05	0.003113
GO_BP	GO:1901698_RESPONSE_TO_NITROGEN_COMPOUND	28	SORT1,CD9,SORBS1,RPE65,LPL,LDOC1,COL4A1,ACVR1C,CA2,ENPP1,FLNA,CAV2,CASQ2,GHR,SDC1,PCK1,GGH,ANO1,GNAI1,BCHE,GNAL,CDH1,BAIAP2L1,PRKAR2B,ADGRL3,ADIPOQ,CES1,MMP9	9.12832e-05	0.00314255
GO_BP	GO:0032288_MYELIN_ASSEMBLY	3	CD9,GPC1,NFASC	9.29106e-05	0.00314255
GO_BP	GO:0009725_RESPONSE_TO_HORMONE	24	SORT1,SORBS1,RPE65,LPL,TUB,ACVR1C,CA2,ENPP1,CAV2,SSTR1,PRKAA2,GHR,SDC1,PCK1,GGH,TNC,GNAI1,BCHE,FBXO32,INHBA,BAIAP2L1,PRKAR2B,ADIPOQ,MAOB	9.79561e-05	0.00314255
GO_BP	GO:0060947_CARDIAC_VASCULAR_SMOOTH_MUSCLE_CELL_DIFFERENTIATION	2	MYOCD,HEY2	9.85811e-05	0.00314255
GO_BP	GO:0042424_CATECHOLAMINE_CATABOLIC_PROCESS	2	MAOA,MAOB	9.85811e-05	0.00314255
GO_BP	GO:0060137_MATERNAL_PROCESS_INVOLVED_IN_PARTURITION	2	KALRN,LDOC1	9.85811e-05	0.00314255
GO_BP	GO:1904753_NEGATIVE_REGULATION_OF_VASCULAR_ASSOCIATED_SMOOTH_MUSCLE_CELL_MIGRATION	2	MYOCD,ADIPOQ	9.85811e-05	0.00314255
GO_BP	GO:1901213_REGULATION_OF_TRANSCRIPTION_FROM_RNA_POLYMERASE_II_PROMOTER_INVOLVED_IN_HEART_DEVELOPMENT	2	MYOCD,GREM1	9.85811e-05	0.00314255
GO_BP	GO:0014866_SKELETAL_MYOFIBRIL_ASSEMBLY	2	MYH11,ACTC1	9.85811e-05	0.00314255
GO_BP	GO:0070252_ACTIN_MEDIATED_CELL_CONTRACTION	7	TPM2,EMP2,GJC1,KCNH2,FLNA,ACTC1,DES	0.000100775	0.00317717
GO_BP	GO:0043434_RESPONSE_TO_PEPTIDE_HORMONE	15	SORT1,SORBS1,RPE65,LPL,ACVR1C,CA2,ENPP1,CAV2,GHR,PCK1,GGH,GNAI1,BAIAP2L1,PRKAR2B,ADIPOQ	0.000108858	0.00335822
GO_BP	GO:0098743_CELL_AGGREGATION	3	SOX6,ACAN,COL11A1	0.000164955	0.00468571
GO_BP	GO:0002092_POSITIVE_REGULATION_OF_RECEPTOR_INTERNALIZATION	3	NTF3,ANGPT1,GREM1	0.000164955	0.00468571
GO_BP	GO:0032868_RESPONSE_TO_INSULIN	11	SORT1,SORBS1,RPE65,LPL,ACVR1C,ENPP1,CAV2,PCK1,GGH,BAIAP2L1,ADIPOQ	0.000168118	0.00472872
GO_BP	GO:0032881_REGULATION_OF_POLYSACCHARIDE_METABOLIC_PROCESS	4	SORBS1,PPP1R3B,ENPP1,PPP1R3C	0.000178111	0.00473872
GO_BP	GO:0045214_SARCOMERE_ORGANIZATION	4	CSRP2,CSRP1,CASQ2,LDB3	0.000178111	0.00473872
GO_BP	GO:0014912_NEGATIVE_REGULATION_OF_SMOOTH_MUSCLE_CELL_MIGRATION	3	SEMA6D,MYOCD,ADIPOQ	0.000196044	0.00516009
GO_BP	GO:0043268_POSITIVE_REGULATION_OF_POTASSIUM_ION_TRANSPORT	4	KCNMB1,FHL1,KCNH2,FLNA	0.000198948	0.00518892
GO_BP	GO:0006853_CARNITINE_SHUTTLE	2	PRKAA2,THRSP	0.000207424	0.00522016
GO_BP	GO:0048251_ELASTIC_FIBER_ASSEMBLY	2	MYH11,EMILIN1	0.000207424	0.00522016
GO_BP	GO:0001765_MEMBRANE_RAFT_ASSEMBLY	2	EMP2,CAV2	0.000207424	0.00522016
GO_BP	GO:0071600_OTIC_VESICLE_MORPHOGENESIS	2	FGFR2,EYA1	0.000207424	0.00522016
GO_BP	GO:0030225_MACROPHAGE_DIFFERENTIATION	4	TSPAN2,INHBA,ADIPOQ,MMP9	0.000221592	0.00551802
GO_BP	GO:0042472_INNER_EAR_MORPHOGENESIS	6	KCNQ4,LRIG1,ITGA8,FGFR2,EYA1,COL11A1	0.000223106	0.00551802
GO_BP	GO:0010738_REGULATION_OF_PROTEIN_KINASE_A_SIGNALING	3	AKAP1,PRKAR2B,ADIPOQ	0.000231143	0.00566794
GO_BP	GO:0050808_SYNAPSE_ORGANIZATION	14	PTPRF,ACTN1,TANC1,KALRN,ADGRL1,COL4A5,COL4A1,NFASC,GPC4,TNC,PDZRN3,MYH10,CDH1,ADGRL3	0.000245595	0.00588491
GO_BP	GO:0045599_NEGATIVE_REGULATION_OF_FAT_CELL_DIFFERENTIATION	4	SORT1,TGFB1I1,ENPP1,ADIPOQ	0.000246145	0.00588491
GO_BP	GO:0016051_CARBOHYDRATE_BIOSYNTHETIC_PROCESS	9	SORBS1,PPP1R3B,GYG2,ENPP1,PPP1R3C,PCK1,ENO2,ST6GALNAC5,ADIPOQ	0.000254488	0.00603411
GO_BP	GO:0006006_GLUCOSE_METABOLIC_PROCESS	9	SORBS1,PPP1R3B,ENPP1,PDK3,PPP1R3C,PCK1,PGM5,ENO2,ADIPOQ	0.000264511	0.00605099
GO_BP	GO:0055083_MONOVALENT_INORGANIC_ANION_HOMEOSTASIS	3	CKB,ENPP1,CA12	0.000270545	0.00605099
GO_BP	GO:0035850_EPITHELIAL_CELL_DIFFERENTIATION_INVOLVED_IN_KIDNEY_DEVELOPMENT	4	ACTA2,ADIPOQ,GREM1,MMP9	0.000272712	0.00605099
GO_BP	GO:0060322_HEAD_DEVELOPMENT	21	CD9,PLXNA4,DIXDC1,CKB,KCNK3,COL4A1,TSPAN2,EDNRA,LHX2,FLNA,AK4,SEMA6D,ITGA8,SSTR1,FGFR2,MYH10,CDH1,INHBA,ADGRL3,MAOB,CRISPLD1	0.000275907	0.00605099
GO_BP	GO:1990778_PROTEIN_LOCALIZATION_TO_CELL_PERIPHERY	12	SORBS1,TUB,SLMAP,EMP2,FLNA,NFASC,GPC4,ADAM22,GNAI1,CDH1,SNAP25,ADIPOQ	0.000276265	0.00605099
GO_BP	GO:0032060_BLEB_ASSEMBLY	2	MYLK,EMP2	0.000282618	0.00605099
GO_BP	GO:0060379_CARDIAC_MUSCLE_CELL_MYOBLAST_DIFFERENTIATION	2	MYOCD,GREM1	0.000282618	0.00605099
GO_BP	GO:0060394_NEGATIVE_REGULATION_OF_PATHWAY_RESTRICTED_SMAD_PROTEIN_PHOSPHORYLATION	2	EMILIN1,GREM1	0.000282618	0.00605099
GO_BP	GO:0042135_NEUROTRANSMITTER_CATABOLIC_PROCESS	2	MAOA,MAOB	0.000282618	0.00605099
GO_BP	GO:0014820_TONIC_SMOOTH_MUSCLE_CONTRACTION	2	MYLK,EDNRA	0.000282618	0.00605099
GO_BP	GO:0055015_VENTRICULAR_CARDIAC_MUSCLE_CELL_DEVELOPMENT	2	HEY2,MYH10	0.000282618	0.00605099
GO_BP	GO:1901653_CELLULAR_RESPONSE_TO_PEPTIDE	13	SORBS1,RPE65,LPL,LDOC1,CA2,ENPP1,CAV2,GHR,PCK1,ANO1,BAIAP2L1,PRKAR2B,ADIPOQ	0.000297834	0.00632952
GO_BP	GO:0007417_CENTRAL_NERVOUS_SYSTEM_DEVELOPMENT	25	VLDLR,CD9,DAAM2,PLXNA4,DIXDC1,CKB,KCNK3,COL4A1,TSPAN2,LHX2,FLNA,SOX6,AK4,SEMA6D,ACAN,ITGA8,SSTR1,FGFR2,ADAM22,MYH10,CDH1,HOXC10,INHBA,ADGRL3,MAOB	0.000307704	0.00649119
GO_BP	GO:0006939_SMOOTH_MUSCLE_CONTRACTION	6	MYLK,MYH11,ACTA2,CNN1,EDNRA,MYOCD	0.000320534	0.00671251
GO_BP	GO:0007422_PERIPHERAL_NERVOUS_SYSTEM_DEVELOPMENT	5	PLXNA4,GPC1,NTF3,NFASC,ADAM22	0.000347838	0.00712819
GO_BP	GO:0110150_NEGATIVE_REGULATION_OF_BIOMINERALIZATION	3	ENPP1,HEY2,GREM1	0.00036345	0.00730853
GO_BP	GO:0045103_INTERMEDIATE_FILAMENT_BASED_PROCESS	4	SYNM,EPPK1,SYNC,DES	0.000365576	0.00730853
GO_BP	GO:0044057_REGULATION_OF_SYSTEM_PROCESS	17	ITPR1,MYL9,HSPB7,EMP2,KCNK3,GJC1,CNN1,KCNH2,FLNA,CASQ2,PPP1R12B,MYOCD,HEY2,FBXO32,INHBA,ADIPOQ,DES	0.000366827	0.00730853
GO_BP	GO:0022008_NEUROGENESIS	35	CSPG4,PTPRF,VLDLR,CD9,DAAM2,PLXNA4,IDH2,DIXDC1,GPC1,NTF3,KALRN,RPE65,TSPAN2,LHX2,FLNA,SOX6,NFASC,SEMA6D,FGFR2,SEMA6A,HEY2,TNC,ADAM22,EYA1,MYH10,BCHE,CDH1,HOXC10,INHBA,PCP4,SNAP25,MATN2,ADGRL3,NRK,CYFIP2	0.000370603	0.00733284
GO_BP	GO:0038180_NERVE_GROWTH_FACTOR_SIGNALING_PATHWAY	2	SORT1,NTF3	0.000373405	0.00733767
GO_BP	GO:0005976_POLYSACCHARIDE_METABOLIC_PROCESS	6	SORBS1,PPP1R3B,GYG2,ENPP1,PPP1R3C,PPP1R1A	0.000380658	0.00742929
GO_BP	GO:0007492_ENDODERM_DEVELOPMENT	5	COL4A2,ITGA7,INHBA,MMP9,COL11A1	0.000400418	0.00772686
GO_BP	GO:0072132_MESENCHYME_MORPHOGENESIS	4	ACTG2,ACTA2,HEY2,ACTC1	0.00040129	0.00772686
GO_BP	GO:1904705_REGULATION_OF_VASCULAR_ASSOCIATED_SMOOTH_MUSCLE_CELL_PROLIFERATION	4	CNN1,MYOCD,ADIPOQ,MMP9	0.000439576	0.00816604
GO_BP	GO:0030308_NEGATIVE_REGULATION_OF_CELL_GROWTH	8	DACT3,WFDC1,FHL1,ENPP1,SEMA6D,SEMA6A,INHBA,GREM1	0.000471631	0.00816604
GO_BP	GO:0035909_AORTA_MORPHOGENESIS	3	MYLK,HEY2,EYA1	0.000477176	0.00816604
GO_BP	GO:0086019_CELL_CELL_SIGNALING_INVOLVED_IN_CARDIAC_CONDUCTION	3	GJC1,FLNA,CASQ2	0.000477176	0.00816604
GO_BP	GO:0008347_GLIAL_CELL_MIGRATION	4	CSPG4,CD9,IDH2,MATN2	0.000480552	0.00816604
GO_BP	GO:0007171_ACTIVATION_OF_TRANSMEMBRANE_RECEPTOR_PROTEIN_TYROSINE_KINASE_ACTIVITY	2	ANGPT1,GREM1	0.000481025	0.00816604
GO_BP	GO:0030002_CELLULAR_ANION_HOMEOSTASIS	2	CKB,ENPP1	0.000481025	0.00816604
GO_BP	GO:0005513_DETECTION_OF_CALCIUM_ION	2	KCNMB1,CASQ2	0.000481025	0.00816604
GO_BP	GO:0010642_NEGATIVE_REGULATION_OF_PLATELET_DERIVED_GROWTH_FACTOR_RECEPTOR_SIGNALING_PATHWAY	2	MYOCD,ADIPOQ	0.000481025	0.00816604
GO_BP	GO:0031953_NEGATIVE_REGULATION_OF_PROTEIN_AUTOPHOSPHORYLATION	2	ENPP1,ADIPOQ	0.000481025	0.00816604
GO_BP	GO:0030948_NEGATIVE_REGULATION_OF_VASCULAR_ENDOTHELIAL_GROWTH_FACTOR_RECEPTOR_SIGNALING_PATHWAY	2	EMILIN1,TNMD	0.000481025	0.00816604
GO_BP	GO:0150105_PROTEIN_LOCALIZATION_TO_CELL_CELL_JUNCTION	2	MPP7,FLNA	0.000481025	0.00816604
GO_BP	GO:0051386_REGULATION_OF_NEUROTROPHIN_TRK_RECEPTOR_SIGNALING_PATHWAY	2	NTF3,CYFIP2	0.000481025	0.00816604
GO_BP	GO:0090042_TUBULIN_DEACETYLATION	2	FLNA,PRKAA2	0.000481025	0.00816604
GO_BP	GO:0006813_POTASSIUM_ION_TRANSPORT	9	KCNQ4,KCNMB1,FHL1,KCNK3,KCNH2,FLNA,CASQ2,SLC24A3,SNAP25	0.00052773	0.00885702
GO_BP	GO:0071402_CELLULAR_RESPONSE_TO_LIPOPROTEIN_PARTICLE_STIMULUS	3	CD9,LPL,CES1	0.000542616	0.00899865
GO_BP	GO:0051150_REGULATION_OF_SMOOTH_MUSCLE_CELL_DIFFERENTIATION	3	FGFR2,MYOCD,HEY2	0.000542616	0.00899865
GO_BP	GO:0035904_AORTA_DEVELOPMENT	4	MYLK,HEY2,EYA1,MYH10	0.000571054	0.00936203
GO_BP	GO:0071398_CELLULAR_RESPONSE_TO_FATTY_ACID	4	LPL,PDK3,PRKAA2,TNC	0.000571054	0.00936203
GO_BP	GO:0010906_REGULATION_OF_GLUCOSE_METABOLIC_PROCESS	6	SORBS1,PPP1R3B,ENPP1,PDK3,PPP1R3C,ADIPOQ	0.000585967	0.00951105
GO_BP	GO:0003214_CARDIAC_LEFT_VENTRICLE_MORPHOGENESIS	2	HEY2,CPE	0.000606665	0.00951105
GO_BP	GO:0055064_CHLORIDE_ION_HOMEOSTASIS	2	CKB,CA12	0.000606665	0.00951105
GO_BP	GO:0010839_NEGATIVE_REGULATION_OF_KERATINOCYTE_PROLIFERATION	2	EPPK1,FGFR2	0.000606665	0.00951105
GO_BP	GO:1900121_NEGATIVE_REGULATION_OF_RECEPTOR_BINDING	2	PTPRF,ADIPOQ	0.000606665	0.00951105
GO_BP	GO:0051547_REGULATION_OF_KERATINOCYTE_MIGRATION	2	EPPK1,MMP9	0.000606665	0.00951105
GO_BP	GO:0060306_REGULATION_OF_MEMBRANE_REPOLARIZATION	3	KCNH2,FLNA,CASQ2	0.000614191	0.0095767
GO_BP	GO:0061005_CELL_DIFFERENTIATION_INVOLVED_IN_KIDNEY_DEVELOPMENT	4	ACTA2,ADIPOQ,GREM1,MMP9	0.00067378	0.0103664
GO_BP	GO:0051145_SMOOTH_MUSCLE_CELL_DIFFERENTIATION	4	ITGA8,FGFR2,MYOCD,HEY2	0.00067378	0.0103664
GO_BP	GO:0071375_CELLULAR_RESPONSE_TO_PEPTIDE_HORMONE_STIMULUS	11	SORBS1,RPE65,LPL,CA2,ENPP1,CAV2,GHR,PCK1,BAIAP2L1,PRKAR2B,ADIPOQ	0.00067568	0.0103664
GO_BP	GO:0042471_EAR_MORPHOGENESIS	6	KCNQ4,LRIG1,ITGA8,FGFR2,EYA1,COL11A1	0.000682466	0.0104149
GO_BP	GO:0048011_NEUROTROPHIN_TRK_RECEPTOR_SIGNALING_PATHWAY	3	SORT1,NTF3,CYFIP2	0.000692212	0.0104524
GO_BP	GO:2001044_REGULATION_OF_INTEGRIN_MEDIATED_SIGNALING_PATHWAY	2	EMP2,FLNA	0.000751463	0.0111707
GO_BP	GO:1905063_REGULATION_OF_VASCULAR_ASSOCIATED_SMOOTH_MUSCLE_CELL_DIFFERENTIATION	2	MYOCD,HEY2	0.000751463	0.0111707
GO_BP	GO:0060009_SERTOLI_CELL_DEVELOPMENT	2	FLNA,SDC1	0.000751463	0.0111707
GO_BP	GO:0070542_RESPONSE_TO_FATTY_ACID	5	LPL,PDK3,PRKAA2,TNC,ADIPOQ	0.000763033	0.0112842
GO_BP	GO:0003015_HEART_PROCESS	10	ITPR1,HSPB7,KCNK3,GJC1,KCNH2,FLNA,CASQ2,HEY2,ACTC1,DES	0.000775825	0.0113735
GO_BP	GO:0034329_CELL_JUNCTION_ASSEMBLY	13	CD9,ACTN1,SORBS1,MPP7,ADGRL1,FBLIM1,GJC1,FLNA,NFASC,GPC4,CDH1,ADGRL3,GREM1	0.000795154	0.0115802
GO_BP	GO:1901699_CELLULAR_RESPONSE_TO_NITROGEN_COMPOUND	18	SORBS1,RPE65,LPL,LDOC1,COL4A1,CA2,ENPP1,FLNA,CAV2,CASQ2,GHR,PCK1,ANO1,GNAL,CDH1,BAIAP2L1,PRKAR2B,ADIPOQ	0.00082674	0.0119306
GO_BP	GO:0034284_RESPONSE_TO_MONOSACCHARIDE	8	SLC29A1,LPL,ACVR1C,PDK3,PRKAA2,PCK1,ANO1,ADIPOQ	0.000827532	0.0119306
GO_BP	GO:0044262_CELLULAR_CARBOHYDRATE_METABOLIC_PROCESS	10	IDH2,SORBS1,PPP1R3B,GYG2,ENPP1,PDK3,PPP1R3C,PCK1,PPP1R1A,ADIPOQ	0.000845915	0.0121347
GO_BP	GO:0060840_ARTERY_DEVELOPMENT	5	MYLK,MYOCD,HEY2,EYA1,MYH10	0.000858981	0.0122195
GO_BP	GO:0090185_NEGATIVE_REGULATION_OF_KIDNEY_DEVELOPMENT	2	ADIPOQ,MMP9	0.000916506	0.0122195
GO_BP	GO:0071599_OTIC_VESICLE_DEVELOPMENT	2	FGFR2,EYA1	0.000916506	0.0122195
GO_BP	GO:2001224_POSITIVE_REGULATION_OF_NEURON_MIGRATION	2	FLNA,SEMA6A	0.000916506	0.0122195
GO_BP	GO:2001212_REGULATION_OF_VASCULOGENESIS	2	EMP2,HEY2	0.000916506	0.0122195
GO_BP	GO:0055081_ANION_HOMEOSTASIS	4	CKB,ENPP1,PRKAA2,CA12	0.000919976	0.0122195
GO_BP	GO:0046888_NEGATIVE_REGULATION_OF_HORMONE_SECRETION	4	KALRN,ACVR1C,INHBA,ADIPOQ	0.000919976	0.0122195
GO_BP	GO:0003382_EPITHELIAL_CELL_MORPHOGENESIS	3	COL15A1,ARHGEF26,TNMD	0.000968111	0.0126251
GO_BP	GO:0019432_TRIGLYCERIDE_BIOSYNTHETIC_PROCESS	3	LPL,PCK1,THRSP	0.000968111	0.0126251
GO_BP	GO:0048844_ARTERY_MORPHOGENESIS	4	MYLK,MYOCD,HEY2,EYA1	0.00106555	0.0136475
GO_BP	GO:2000727_POSITIVE_REGULATION_OF_CARDIAC_MUSCLE_CELL_DIFFERENTIATION	2	MYOCD,GREM1	0.00110283	0.0137216
GO_BP	GO:0030730_SEQUESTERING_OF_TRIGLYCERIDE	2	LPL,ENPP1	0.00110283	0.0137216
GO_BP	GO:0043255_REGULATION_OF_CARBOHYDRATE_BIOSYNTHETIC_PROCESS	5	SORBS1,PPP1R3B,ENPP1,PPP1R3C,ADIPOQ	0.00113964	0.0137216
GO_BP	GO:0035914_SKELETAL_MUSCLE_CELL_DIFFERENTIATION	4	GPC1,MYOCD,ASB2,RBM24	0.00114442	0.0137216
GO_BP	GO:0010737_PROTEIN_KINASE_A_SIGNALING	3	AKAP1,PRKAR2B,ADIPOQ	0.00119007	0.0137216
GO_BP	GO:0006941_STRIATED_MUSCLE_CONTRACTION	7	SYNM,GJC1,KCNH2,FLNA,CASQ2,DTNA,ACTC1	0.00119568	0.0137216
GO_BP	GO:0043266_REGULATION_OF_POTASSIUM_ION_TRANSPORT	5	KCNMB1,FHL1,KCNH2,FLNA,CASQ2	0.00120333	0.0137216
GO_BP	GO:0010002_CARDIOBLAST_DIFFERENTIATION	2	MYOCD,GREM1	0.00131143	0.0137216
GO_BP	GO:0071397_CELLULAR_RESPONSE_TO_CHOLESTEROL	2	INHBA,CES1	0.00131143	0.0137216
GO_BP	GO:0010878_CHOLESTEROL_STORAGE	2	LPL,CES1	0.00131143	0.0137216
GO_BP	GO:0030049_MUSCLE_FILAMENT_SLIDING	3	TPM2,ACTC1,DES	0.00131341	0.0137216
GO_BP	GO:0038179_NEUROTROPHIN_SIGNALING_PATHWAY	3	SORT1,NTF3,CYFIP2	0.00131341	0.0137216
GO_BP	GO:0006730_ONE_CARBON_METABOLIC_PROCESS	3	CA2,CA12,CA3	0.00131341	0.0137216
GO_BP	GO:0005975_CARBOHYDRATE_METABOLIC_PROCESS	16	IDH2,SORBS1,ALDH1B1,PPP1R3B,GYG2,ENPP1,PDK3,PRKAA2,PPP1R3C,ST6GAL2,PCK1,PGM5,ENO2,PPP1R1A,ST6GALNAC5,ADIPOQ	0.00134128	0.0137216
GO_BP	GO:0048863_STEM_CELL_DIFFERENTIATION	9	EDNRA,SOX6,SEMA6D,FGFR2,MYOCD,SEMA6A,BCHE,RBM24,GREM1	0.00139989	0.0137216
GO_BP	GO:0007212_DOPAMINE_RECEPTOR_SIGNALING_PATHWAY	3	FLNA,CAV2,GNAL	0.0014454	0.0137216
GO_BP	GO:0043583_EAR_DEVELOPMENT	8	KCNQ4,LRIG1,KCNK3,ITGA8,FGFR2,HEY2,EYA1,COL11A1	0.00146819	0.0137216
GO_BP	GO:0086001_CARDIAC_MUSCLE_CELL_ACTION_POTENTIAL	4	SLMAP,GJC1,KCNH2,FLNA	0.00150371	0.0137931
GO_BP	GO:0002064_EPITHELIAL_CELL_DEVELOPMENT	8	SHROOM3,ACTA2,FLNA,COL15A1,SDC1,ARHGEF26,TNMD,ADIPOQ	0.00151569	0.0137931
GO_BP	GO:0086026_ATRIAL_CARDIAC_MUSCLE_CELL_TO_AV_NODE_CELL_SIGNALING	2	GJC1,FLNA	0.00154325	0.0137931
GO_BP	GO:0060602_BRANCH_ELONGATION_OF_AN_EPITHELIUM	2	FGFR2,TNC	0.00154325	0.0137931
GO_BP	GO:0051546_KERATINOCYTE_MIGRATION	2	EPPK1,MMP9	0.00154325	0.0137931
GO_BP	GO:0030502_NEGATIVE_REGULATION_OF_BONE_MINERALIZATION	2	ENPP1,GREM1	0.00154325	0.0137931
GO_BP	GO:2000251_POSITIVE_REGULATION_OF_ACTIN_CYTOSKELETON_REORGANIZATION	2	NTF3,BAIAP2L1	0.00154325	0.0137931
GO_BP	GO:2000696_REGULATION_OF_EPITHELIAL_CELL_DIFFERENTIATION_INVOLVED_IN_KIDNEY_DEVELOPMENT	2	ADIPOQ,MMP9	0.00154325	0.0137931
GO_BP	GO:0097503_SIALYLATION	2	ST6GAL2,ST6GALNAC5	0.00154325	0.0137931
GO_BP	GO:0015701_BICARBONATE_TRANSPORT	3	CA2,CA12,CA3	0.00158637	0.0141344
GO_BP	GO:0035690_CELLULAR_RESPONSE_TO_DRUG	4	PPP1R14A,KCNH2,PRKAA2,ADIPOQ	0.00160519	0.0142138
GO_BP	GO:0046323_GLUCOSE_IMPORT	4	SORT1,SORBS1,ENPP1,ADIPOQ	0.00160519	0.0142138
GO_BP	GO:0032869_CELLULAR_RESPONSE_TO_INSULIN_STIMULUS	8	SORBS1,RPE65,LPL,ENPP1,CAV2,PCK1,BAIAP2L1,ADIPOQ	0.00166563	0.0147037
GO_BP	GO:0032870_CELLULAR_RESPONSE_TO_HORMONE_STIMULUS	16	SORBS1,RPE65,LPL,CA2,ENPP1,CAV2,SSTR1,PRKAA2,GHR,PCK1,TNC,FBXO32,INHBA,BAIAP2L1,PRKAR2B,ADIPOQ	0.0017114	0.0150171
GO_BP	GO:1900076_REGULATION_OF_CELLULAR_RESPONSE_TO_INSULIN_STIMULUS	4	SORBS1,LPL,ENPP1,BAIAP2L1	0.0017116	0.0150171
GO_BP	GO:0032365_INTRACELLULAR_LIPID_TRANSPORT	3	PRKAA2,THRSP,CES1	0.00173662	0.0151439
GO_BP	GO:0046460_NEUTRAL_LIPID_BIOSYNTHETIC_PROCESS	3	LPL,PCK1,THRSP	0.00173662	0.0151439
GO_BP	GO:0006091_GENERATION_OF_PRECURSOR_METABOLITES_AND_ENERGY	14	IDH2,SORBS1,ALDH1B1,PPP1R3B,HSD17B6,GYG2,ENPP1,AK4,PRKAA2,PPP1R3C,ENO2,PPP1R1A,ADIPOQ,MAOB	0.00179743	0.0154548
GO_BP	GO:1905208_NEGATIVE_REGULATION_OF_CARDIOCYTE_DIFFERENTIATION	2	SOX6,HEY2	0.0017992	0.0154548
GO_BP	GO:0010875_POSITIVE_REGULATION_OF_CHOLESTEROL_EFFLUX	2	ADIPOQ,CES1	0.0017992	0.0154548
GO_BP	GO:2000479_REGULATION_OF_CAMP_DEPENDENT_PROTEIN_KINASE_ACTIVITY	2	PRKAR2B,ADIPOQ	0.0017992	0.0154548
GO_BP	GO:0060008_SERTOLI_CELL_DIFFERENTIATION	2	FLNA,SDC1	0.0017992	0.0154548
GO_BP	GO:0014823_RESPONSE_TO_ACTIVITY	4	COL4A2,PRKAA2,PCK1,ADIPOQ	0.0018231	0.0156134
GO_BP	GO:0086009_MEMBRANE_REPOLARIZATION	3	KCNH2,FLNA,CASQ2	0.00189646	0.0156417
GO_BP	GO:1902414_PROTEIN_LOCALIZATION_TO_CELL_JUNCTION	5	MPP7,FLNA,GPC4,ADAM22,SNAP25	0.00190666	0.0156417
GO_BP	GO:0061337_CARDIAC_CONDUCTION	6	ITPR1,KCNK3,GJC1,KCNH2,FLNA,CASQ2	0.00191007	0.0156417
GO_BP	GO:0009743_RESPONSE_TO_CARBOHYDRATE	8	SLC29A1,LPL,ACVR1C,PDK3,PRKAA2,PCK1,ANO1,ADIPOQ	0.0019418	0.0156417
GO_BP	GO:0010675_REGULATION_OF_CELLULAR_CARBOHYDRATE_METABOLIC_PROCESS	6	SORBS1,PPP1R3B,ENPP1,PDK3,PPP1R3C,ADIPOQ	0.00198781	0.0156417
GO_BP	GO:0090100_POSITIVE_REGULATION_OF_TRANSMEMBRANE_RECEPTOR_PROTEIN_SERINE_THREONINE_KINASE_SIGNALING_PATHWAY	5	TGFB1I1,RBPMS,ITGA8,MYOCD,INHBA	0.00200068	0.0156417
GO_BP	GO:0016049_CELL_GROWTH	13	PLXNA4,DACT3,WFDC1,IGFBPL1,FHL1,ENPP1,LHX2,SEMA6D,MYOCD,SEMA6A,INHBA,CYFIP2,GREM1	0.00205936	0.0156417
GO_BP	GO:2000678_NEGATIVE_REGULATION_OF_TRANSCRIPTION_REGULATORY_REGION_DNA_BINDING	2	LHX2,HEY2	0.00208012	0.0156417
GO_BP	GO:2000738_POSITIVE_REGULATION_OF_STEM_CELL_DIFFERENTIATION	2	SOX6,RBM24	0.00208012	0.0156417
GO_BP	GO:0051004_REGULATION_OF_LIPOPROTEIN_LIPASE_ACTIVITY	2	SORT1,LPL	0.00208012	0.0156417
GO_BP	GO:0045649_REGULATION_OF_MACROPHAGE_DIFFERENTIATION	2	INHBA,ADIPOQ	0.00208012	0.0156417
GO_BP	GO:0030855_EPITHELIAL_CELL_DIFFERENTIATION	17	SHROOM3,COL4A1,ACTA2,TGFB1I1,TAGLN,FLNA,COL15A1,FGFR2,SDC1,PCK1,HEY2,ARHGEF26,TNMD,ADIPOQ,CES1,GREM1,MMP9	0.00215143	0.0156417
GO_BP	GO:0034219_CARBOHYDRATE_TRANSMEMBRANE_TRANSPORT	5	SORT1,SORBS1,EDNRA,ENPP1,ADIPOQ	0.00230385	0.0163204
GO_BP	GO:0045596_NEGATIVE_REGULATION_OF_CELL_DIFFERENTIATION	17	SORT1,DAAM2,DACT3,IDH2,DIXDC1,TGFB1I1,ENPP1,LHX2,SOX6,SEMA6D,MYOCD,SEMA6A,HEY2,INHBA,ADIPOQ,GREM1,MMP9	0.00236263	0.0166614
GO_BP	GO:0071379_CELLULAR_RESPONSE_TO_PROSTAGLANDIN_STIMULUS	2	PRKAA2,TNC	0.00238683	0.0166614
GO_BP	GO:0036315_CELLULAR_RESPONSE_TO_STEROL	2	INHBA,CES1	0.00238683	0.0166614
GO_BP	GO:1902001_FATTY_ACID_TRANSMEMBRANE_TRANSPORT	2	PRKAA2,THRSP	0.00238683	0.0166614
GO_BP	GO:0099645_NEUROTRANSMITTER_RECEPTOR_LOCALIZATION_TO_POSTSYNAPTIC_SPECIALIZATION_MEMBRANE	2	GPC4,ADAM22	0.00238683	0.0166614
GO_BP	GO:0048745_SMOOTH_MUSCLE_TISSUE_DEVELOPMENT	2	MYLK,ITGA8	0.00238683	0.0166614
GO_BP	GO:0048641_REGULATION_OF_SKELETAL_MUSCLE_TISSUE_DEVELOPMENT	3	GPC1,MYOCD,RBM24	0.00243666	0.0169268
GO_BP	GO:0043112_RECEPTOR_METABOLIC_PROCESS	7	VLDLR,CD9,NTF3,ANGPT1,SNAP25,ADIPOQ,GREM1	0.00249847	0.0172726
GO_BP	GO:0031623_RECEPTOR_INTERNALIZATION	5	CD9,NTF3,ANGPT1,SNAP25,GREM1	0.00252437	0.0174089
GO_BP	GO:0005996_MONOSACCHARIDE_METABOLIC_PROCESS	9	SORBS1,PPP1R3B,ENPP1,PDK3,PPP1R3C,PCK1,PGM5,ENO2,ADIPOQ	0.00261557	0.0179095
GO_BP	GO:0060976_CORONARY_VASCULATURE_DEVELOPMENT	3	MYOCD,HEY2,MYH10	0.00263796	0.0179344
GO_BP	GO:0048662_NEGATIVE_REGULATION_OF_SMOOTH_MUSCLE_CELL_PROLIFERATION	3	CNN1,MYOCD,ADIPOQ	0.00263796	0.0179344
GO_BP	GO:0048754_BRANCHING_MORPHOGENESIS_OF_AN_EPITHELIAL_TUBE	6	COL4A1,EDNRA,FGFR2,TNC,EYA1,GREM1	0.00270144	0.0182764
GO_BP	GO:0032799_LOW_DENSITY_LIPOPROTEIN_RECEPTOR_PARTICLE_METABOLIC_PROCESS	2	VLDLR,ADIPOQ	0.00272011	0.0182764
GO_BP	GO:1901380_NEGATIVE_REGULATION_OF_POTASSIUM_ION_TRANSMEMBRANE_TRANSPORT	2	KCNH2,CASQ2	0.00272011	0.0182764
GO_BP	GO:0048643_POSITIVE_REGULATION_OF_SKELETAL_MUSCLE_TISSUE_DEVELOPMENT	2	GPC1,RBM24	0.00272011	0.0182764
GO_BP	GO:0010640_REGULATION_OF_PLATELET_DERIVED_GROWTH_FACTOR_RECEPTOR_SIGNALING_PATHWAY	2	MYOCD,ADIPOQ	0.00272011	0.0182764
GO_BP	GO:0062237_PROTEIN_LOCALIZATION_TO_POSTSYNAPSE	3	GPC4,ADAM22,SNAP25	0.00285037	0.0183827
GO_BP	GO:0031952_REGULATION_OF_PROTEIN_AUTOPHOSPHORYLATION	3	ENPP1,ADIPOQ,GREM1	0.00285037	0.0183827
GO_BP	GO:0040007_GROWTH	21	CD9,PLXNA4,DACT3,WFDC1,IGFBPL1,EPPK1,FHL1,ACVR1C,ENPP1,LHX2,SEMA6D,GHR,FGFR2,MYOCD,SEMA6A,HEY2,TNC,INHBA,NRK,CYFIP2,GREM1	0.00286652	0.0183827
GO_BP	GO:0001570_VASCULOGENESIS	4	EMP2,GJC1,MYOCD,HEY2	0.00291545	0.0183827
GO_BP	GO:0040008_REGULATION_OF_GROWTH	16	PLXNA4,DACT3,WFDC1,IGFBPL1,EPPK1,FHL1,ENPP1,SEMA6D,GHR,FGFR2,MYOCD,SEMA6A,HEY2,INHBA,NRK,GREM1	0.00298236	0.0183827
GO_BP	GO:0045926_NEGATIVE_REGULATION_OF_GROWTH	8	DACT3,WFDC1,FHL1,ENPP1,SEMA6D,SEMA6A,INHBA,GREM1	0.00307939	0.018452
GO_BP	GO:0007141_MALE_MEIOSIS_I	2	HSPA2,MYBL1	0.0030807	0.018452
GO_BP	GO:0031579_MEMBRANE_RAFT_ORGANIZATION	2	EMP2,CAV2	0.0030807	0.018452
GO_BP	GO:1904738_VASCULAR_ASSOCIATED_SMOOTH_MUSCLE_CELL_MIGRATION	2	MYOCD,ADIPOQ	0.0030807	0.018452
GO_BP	GO:1903522_REGULATION_OF_BLOOD_CIRCULATION	9	ITPR1,HSPB7,KCNK3,GJC1,KCNH2,FLNA,CASQ2,HEY2,DES	0.00311904	0.0186428
GO_BP	GO:0006721_TERPENOID_METABOLIC_PROCESS	5	GPC1,RPE65,LPL,GPC4,SDC1	0.00314492	0.0187584
GO_BP	GO:0086002_CARDIAC_MUSCLE_CELL_ACTION_POTENTIAL_INVOLVED_IN_CONTRACTION	3	GJC1,KCNH2,FLNA	0.00330973	0.0195786
GO_BP	GO:0090102_COCHLEA_DEVELOPMENT	3	KCNK3,HEY2,EYA1	0.00330973	0.0195786
GO_BP	GO:0035637_MULTICELLULAR_ORGANISMAL_SIGNALING	7	ITPR1,KCNK3,GJC1,KCNH2,FLNA,NFASC,CASQ2	0.00331734	0.0195832
GO_BP	GO:0045109_INTERMEDIATE_FILAMENT_ORGANIZATION	2	EPPK1,DES	0.00346927	0.020178
GO_BP	GO:0086011_MEMBRANE_REPOLARIZATION_DURING_ACTION_POTENTIAL	2	KCNH2,FLNA	0.00346927	0.020178
GO_BP	GO:0010664_NEGATIVE_REGULATION_OF_STRIATED_MUSCLE_CELL_APOPTOTIC_PROCESS	2	MYOCD,HEY2	0.00346927	0.020178
GO_BP	GO:0099623_REGULATION_OF_CARDIAC_MUSCLE_CELL_MEMBRANE_REPOLARIZATION	2	KCNH2,FLNA	0.00346927	0.020178
GO_BP	GO:0014829_VASCULAR_ASSOCIATED_SMOOTH_MUSCLE_CONTRACTION	2	ACTA2,EDNRA	0.00346927	0.020178
GO_BP	GO:0043467_REGULATION_OF_GENERATION_OF_PRECURSOR_METABOLITES_AND_ENERGY	6	SORBS1,PPP1R3B,ENPP1,AK4,PRKAA2,PPP1R3C	0.00347436	0.020178
GO_BP	GO:0010043_RESPONSE_TO_ZINC_ION	3	KCNK3,CA2,GGH	0.00355726	0.0206177
GO_BP	GO:0007193_ADENYLATE_CYCLASE_INHIBITING_G_PROTEIN_COUPLED_RECEPTOR_SIGNALING_PATHWAY	4	EDNRA,FLNA,GNAI1,GNAL	0.00361029	0.0208829
GO_BP	GO:0042063_GLIOGENESIS	9	CSPG4,CD9,DAAM2,IDH2,GPC1,TSPAN2,SOX6,ADAM22,MATN2	0.00369699	0.0209965
GO_BP	GO:0060429_EPITHELIUM_DEVELOPMENT	25	EPPK1,SHROOM3,COL4A1,ACTA2,TGFB1I1,TAGLN,CA2,EDNRA,LHX2,FLNA,COL15A1,GPC4,FGFR2,SDC1,PCK1,HEY2,TNC,ARHGEF26,EYA1,TNMD,INHBA,ADIPOQ,CES1,GREM1,MMP9	0.00377803	0.0209965
GO_BP	GO:0010563_NEGATIVE_REGULATION_OF_PHOSPHORUS_METABOLIC_PROCESS	14	PPP1R14A,NTF3,EMILIN1,SPOCD1,RGS3,ENPP1,ANGPT1,MYOCD,SEMA6A,PPP1R1A,INHBA,PRKAR2B,ADIPOQ,GREM1	0.0037794	0.0209965
GO_BP	GO:0006937_REGULATION_OF_MUSCLE_CONTRACTION	6	MYL9,CNN1,FLNA,CASQ2,PPP1R12B,MYOCD	0.0038529	0.0209965
GO_BP	GO:0006109_REGULATION_OF_CARBOHYDRATE_METABOLIC_PROCESS	7	SORBS1,PPP1R3B,ENPP1,PDK3,PRKAA2,PPP1R3C,ADIPOQ	0.00385463	0.0209965
GO_BP	GO:0072202_CELL_DIFFERENTIATION_INVOLVED_IN_METANEPHROS_DEVELOPMENT	2	ADIPOQ,GREM1	0.0038865	0.0209965
GO_BP	GO:0071377_CELLULAR_RESPONSE_TO_GLUCAGON_STIMULUS	2	PCK1,PRKAR2B	0.0038865	0.0209965
GO_BP	GO:0060314_REGULATION_OF_RYANODINE_SENSITIVE_CALCIUM_RELEASE_CHANNEL_ACTIVITY	2	JPH2,CASQ2	0.0038865	0.0209965
GO_BP	GO:0060343_TRABECULA_FORMATION	2	HEY2,GREM1	0.0038865	0.0209965
GO_BP	GO:0035886_VASCULAR_ASSOCIATED_SMOOTH_MUSCLE_CELL_DIFFERENTIATION	2	MYOCD,HEY2	0.0038865	0.0209965
GO_BP	GO:0071407_CELLULAR_RESPONSE_TO_ORGANIC_CYCLIC_COMPOUND	14	KCNMB1,FLNA,CAV2,CASQ2,SSTR1,PCK1,TNC,GNAI1,GNAL,CDH1,FBXO32,INHBA,ADIPOQ,CES1	0.00390659	0.0209965
GO_BP	GO:0002090_REGULATION_OF_RECEPTOR_INTERNALIZATION	3	NTF3,ANGPT1,GREM1	0.00408943	0.0212933
GO_BP	GO:0031960_RESPONSE_TO_CORTICOSTEROID	6	SDC1,PCK1,BCHE,FBXO32,ADIPOQ,MAOB	0.00426198	0.0221114
GO_BP	GO:0021846_CELL_PROLIFERATION_IN_FOREBRAIN	2	DIXDC1,FGFR2	0.00433299	0.0223586
GO_BP	GO:1902668_NEGATIVE_REGULATION_OF_AXON_GUIDANCE	2	SEMA6D,SEMA6A	0.00433299	0.0223586
GO_BP	GO:0061437_RENAL_SYSTEM_VASCULATURE_DEVELOPMENT	2	ACTA2,ANGPT1	0.00433299	0.0223586
GO_BP	GO:0086065_CELL_COMMUNICATION_INVOLVED_IN_CARDIAC_CONDUCTION	3	GJC1,FLNA,CASQ2	0.00437464	0.0224926
GO_BP	GO:0031102_NEURON_PROJECTION_REGENERATION	3	PTPRF,TNC,MATN2	0.00467296	0.0237893
GO_BP	GO:0046324_REGULATION_OF_GLUCOSE_IMPORT	3	SORBS1,ENPP1,ADIPOQ	0.00467296	0.0237893
GO_BP	GO:0090183_REGULATION_OF_KIDNEY_DEVELOPMENT	3	ADIPOQ,GREM1,MMP9	0.00467296	0.0237893
GO_BP	GO:0003229_VENTRICULAR_CARDIAC_MUSCLE_TISSUE_DEVELOPMENT	3	FGFR2,HEY2,COL11A1	0.00467296	0.0237893
GO_BP	GO:0010038_RESPONSE_TO_METAL_ION	10	KCNMB1,KCNK3,CA2,CASQ2,PRKAA2,SDC1,GGH,CDH1,MAOB,MMP9	0.0046766	0.0237893
GO_BP	GO:0000904_CELL_MORPHOGENESIS_INVOLVED_IN_DIFFERENTIATION	17	VLDLR,PLXNA4,ACTN1,GPC1,KALRN,LHX2,FLNA,NFASC,COL15A1,SEMA6D,ITGA8,FGFR2,SEMA6A,ARHGEF26,MYH10,TNMD,MATN2	0.00476484	0.0241038
GO_BP	GO:0060512_PROSTATE_GLAND_MORPHOGENESIS	2	FGFR2,TNC	0.00480934	0.0241038
GO_BP	GO:0098901_REGULATION_OF_CARDIAC_MUSCLE_CELL_ACTION_POTENTIAL	2	SLMAP,FLNA	0.00480934	0.0241038
GO_BP	GO:0006929_SUBSTRATE_DEPENDENT_CELL_MIGRATION	2	CSPG4,MYH10	0.00480934	0.0241038
GO_BP	GO:0099560_SYNAPTIC_MEMBRANE_ADHESION	2	PTPRF,GPC4	0.00480934	0.0241038
GO_BP	GO:0097120_RECEPTOR_LOCALIZATION_TO_SYNAPSE	3	GPC4,ADAM22,SNAP25	0.00531001	0.0245997
GO_BP	GO:0003401_AXIS_ELONGATION	2	FGFR2,TNC	0.00531608	0.0245997
GO_BP	GO:0060441_EPITHELIAL_TUBE_BRANCHING_INVOLVED_IN_LUNG_MORPHOGENESIS	2	FGFR2,TNC	0.00531608	0.0245997
GO_BP	GO:0042133_NEUROTRANSMITTER_METABOLIC_PROCESS	2	MAOA,MAOB	0.00531608	0.0245997
GO_BP	GO:0033687_OSTEOBLAST_PROLIFERATION	2	FGFR2,GREM1	0.00531608	0.0245997
GO_BP	GO:0032373_POSITIVE_REGULATION_OF_STEROL_TRANSPORT	2	ADIPOQ,CES1	0.00531608	0.0245997
GO_BP	GO:0071711_BASEMENT_MEMBRANE_ORGANIZATION	2	COL4A1,CAV2	0.00585374	0.0267001
GO_BP	GO:0050849_NEGATIVE_REGULATION_OF_CALCIUM_MEDIATED_SIGNALING	2	ITPR1,CASQ2	0.00585374	0.0267001
GO_BP	GO:0010874_REGULATION_OF_CHOLESTEROL_EFFLUX	2	ADIPOQ,CES1	0.00585374	0.0267001
GO_BP	GO:0030947_REGULATION_OF_VASCULAR_ENDOTHELIAL_GROWTH_FACTOR_RECEPTOR_SIGNALING_PATHWAY	2	EMILIN1,TNMD	0.00585374	0.0267001
GO_BP	GO:0007160_CELL_MATRIX_ADHESION	7	ACTN1,SORBS1,EMILIN1,EMP2,ITGA7,ITGA8,GREM1	0.00587621	0.0267601
GO_BP	GO:0060048_CARDIAC_MUSCLE_CONTRACTION	5	GJC1,KCNH2,FLNA,CASQ2,ACTC1	0.00612172	0.0272992
GO_BP	GO:0034113_HETEROTYPIC_CELL_CELL_ADHESION	3	ITGA7,NFASC,ADIPOQ	0.00637053	0.0272992
GO_BP	GO:0010644_CELL_COMMUNICATION_BY_ELECTRICAL_COUPLING	2	GJC1,CASQ2	0.00642279	0.0272992
GO_BP	GO:0071549_CELLULAR_RESPONSE_TO_DEXAMETHASONE_STIMULUS	2	PCK1,FBXO32	0.00642279	0.0272992
GO_BP	GO:0002063_CHONDROCYTE_DEVELOPMENT	2	ACAN,COL11A1	0.00642279	0.0272992
GO_BP	GO:0051354_NEGATIVE_REGULATION_OF_OXIDOREDUCTASE_ACTIVITY	2	AOC3,PDK3	0.00642279	0.0272992
GO_BP	GO:0043267_NEGATIVE_REGULATION_OF_POTASSIUM_ION_TRANSPORT	2	KCNH2,CASQ2	0.00642279	0.0272992
GO_BP	GO:0010743_REGULATION_OF_MACROPHAGE_DERIVED_FOAM_CELL_DIFFERENTIATION	2	LPL,ADIPOQ	0.00642279	0.0272992
GO_BP	GO:0036314_RESPONSE_TO_STEROL	2	INHBA,CES1	0.00642279	0.0272992
GO_BP	GO:0031400_NEGATIVE_REGULATION_OF_PROTEIN_MODIFICATION_PROCESS	14	PPP1R14A,NTF3,EMILIN1,RGS3,ENPP1,ANGPT1,PRKAA2,MYOCD,SEMA6A,NXN,PPP1R1A,PRKAR2B,ADIPOQ,GREM1	0.00656314	0.0277734
GO_BP	GO:0006720_ISOPRENOID_METABOLIC_PROCESS	5	GPC1,RPE65,LPL,GPC4,SDC1	0.00657307	0.0277734
GO_BP	GO:0001701_IN_UTERO_EMBRYONIC_DEVELOPMENT	10	ACVR1C,EDNRA,SOX6,ANGPT1,FGFR2,HEY2,NXN,MYH10,NRK,PLPP4	0.00670882	0.0283053
GO_BP	GO:0071453_CELLULAR_RESPONSE_TO_OXYGEN_LEVELS	7	EGLN3,SLC29A1,KCNMB1,KCNK3,PDK3,AK4,PCK1	0.0068791	0.0289811
GO_BP	GO:0003176_AORTIC_VALVE_DEVELOPMENT	2	EMILIN1,HEY2	0.00702367	0.0292891
GO_BP	GO:0050869_NEGATIVE_REGULATION_OF_B_CELL_ACTIVATION	2	PAWR,INHBA	0.00702367	0.0292891
GO_BP	GO:1900077_NEGATIVE_REGULATION_OF_CELLULAR_RESPONSE_TO_INSULIN_STIMULUS	2	LPL,ENPP1	0.00702367	0.0292891
GO_BP	GO:0009954_PROXIMAL_DISTAL_PATTERN_FORMATION	2	HOXC10,GREM1	0.00702367	0.0292891
GO_BP	GO:0034694_RESPONSE_TO_PROSTAGLANDIN	2	PRKAA2,TNC	0.00702367	0.0292891
GO_BP	GO:0021591_VENTRICULAR_SYSTEM_DEVELOPMENT	2	SEMA6D,MYH10	0.00702367	0.0292891
GO_BP	GO:1904589_REGULATION_OF_PROTEIN_IMPORT	3	FLNA,ANGPT1,CDH1	0.00715042	0.0296759
GO_BP	GO:0071869_RESPONSE_TO_CATECHOLAMINE	4	FLNA,CAV2,GNAL,ADIPOQ	0.00728394	0.0296759
GO_BP	GO:0008286_INSULIN_RECEPTOR_SIGNALING_PATHWAY	5	SORBS1,RPE65,ENPP1,CAV2,BAIAP2L1	0.00729474	0.0296759
GO_BP	GO:0048659_SMOOTH_MUSCLE_CELL_PROLIFERATION	5	CNN1,FGFR2,MYOCD,ADIPOQ,MMP9	0.00729474	0.0296759
GO_BP	GO:0090257_REGULATION_OF_MUSCLE_SYSTEM_PROCESS	7	MYL9,CNN1,FLNA,CASQ2,PPP1R12B,MYOCD,FBXO32	0.00742666	0.0296759
GO_BP	GO:0032835_GLOMERULUS_DEVELOPMENT	3	ACTA2,ANGPT1,ADIPOQ	0.00756295	0.0296759
GO_BP	GO:0060560_DEVELOPMENTAL_GROWTH_INVOLVED_IN_MORPHOGENESIS	7	PLXNA4,LHX2,SEMA6D,FGFR2,SEMA6A,TNC,CYFIP2	0.0076163	0.0296759
GO_BP	GO:0001569_BRANCHING_INVOLVED_IN_BLOOD_VESSEL_MORPHOGENESIS	2	COL4A1,EDNRA	0.00765682	0.0296759
GO_BP	GO:0048665_NEURON_FATE_SPECIFICATION	2	EYA1,HOXC10	0.00765682	0.0296759
GO_BP	GO:0000038_VERY_LONG_CHAIN_FATTY_ACID_METABOLIC_PROCESS	2	ACOT1,HACD1	0.00765682	0.0296759
GO_BP	GO:0071322_CELLULAR_RESPONSE_TO_CARBOHYDRATE_STIMULUS	5	SLC29A1,PDK3,PRKAA2,PCK1,ANO1	0.00780661	0.0299828
GO_BP	GO:0051048_NEGATIVE_REGULATION_OF_SECRETION	6	IDH2,KALRN,ACVR1C,INHBA,ADIPOQ,MAOB	0.00788338	0.0302372
GO_BP	GO:0001885_ENDOTHELIAL_CELL_DEVELOPMENT	3	COL15A1,ARHGEF26,TNMD	0.00799085	0.0305677
GO_BP	GO:0034394_PROTEIN_LOCALIZATION_TO_CELL_SURFACE	3	EMP2,FLNA,ANGPT1	0.00799085	0.0305677
GO_BP	GO:0008643_CARBOHYDRATE_TRANSPORT	5	SORT1,SORBS1,EDNRA,ENPP1,ADIPOQ	0.00807203	0.0308371
GO_BP	GO:0048709_OLIGODENDROCYTE_DIFFERENTIATION	4	CD9,DAAM2,TSPAN2,SOX6	0.00824891	0.0314709
GO_BP	GO:1904062_REGULATION_OF_CATION_TRANSMEMBRANE_TRANSPORT	9	KCNMB1,SLMAP,FHL1,JPH2,HSPA2,KCNH2,FLNA,CASQ2,MMP9	0.00830227	0.0316324
GO_BP	GO:0072073_KIDNEY_EPITHELIUM_DEVELOPMENT	5	FGFR2,SDC1,EYA1,ADIPOQ,GREM1	0.00834388	0.0316648
GO_BP	GO:0072006_NEPHRON_DEVELOPMENT	5	ACTA2,ANGPT1,EYA1,ADIPOQ,GREM1	0.00834388	0.0316648
GO_BP	GO:0030030_CELL_PROJECTION_ORGANIZATION	29	CSPG4,PTPRF,VLDLR,MYLK,PLXNA4,TANC1,GPC1,NTF3,KALRN,TUB,EMP2,TSPAN2,CDC42EP3,LHX2,FLNA,NFASC,SEMA6D,ITGA8,FGFR2,SEMA6A,TNC,ARHGEF26,MYH10,CDH1,SNAP25,PRKAR2B,MATN2,NRK,CYFIP2	0.00849597	0.0321569
GO_BP	GO:0051051_NEGATIVE_REGULATION_OF_TRANSPORT	11	IDH2,KALRN,ACVR1C,ENPP1,KCNH2,CASQ2,ANGPT1,INHBA,ADIPOQ,MAOB,MMP9	0.00858924	0.0324671
GO_BP	GO:0099536_SYNAPTIC_SIGNALING	16	NTF3,SLC29A1,KCNMB1,RIMS3,KCNK3,GJC1,CA2,DTNA,GNAI1,MCTP2,PLCB4,BCHE,CDH1,SNAP25,PRKAR2B,ADIPOQ	0.00864912	0.0326075
GO_BP	GO:0042326_NEGATIVE_REGULATION_OF_PHOSPHORYLATION	11	NTF3,EMILIN1,RGS3,ENPP1,ANGPT1,MYOCD,SEMA6A,INHBA,PRKAR2B,ADIPOQ,GREM1	0.00873611	0.0327477
GO_BP	GO:0050731_POSITIVE_REGULATION_OF_PEPTIDYL_TYROSINE_PHOSPHORYLATION	6	CSPG4,NTF3,ANGPT1,GHR,ADIPOQ,GREM1	0.00881924	0.0327477
GO_BP	GO:0007612_LEARNING	5	TANC1,KALRN,BCHE,SNAP25,PRKAR2B	0.00890721	0.0327477
GO_BP	GO:0001823_MESONEPHROS_DEVELOPMENT	4	FGFR2,SDC1,EYA1,GREM1	0.00893937	0.0327477
GO_BP	GO:0021510_SPINAL_CORD_DEVELOPMENT	4	VLDLR,DAAM2,SOX6,HOXC10	0.00893937	0.0327477
GO_BP	GO:0099622_CARDIAC_MUSCLE_CELL_MEMBRANE_REPOLARIZATION	2	KCNH2,FLNA	0.0090214	0.0327477
GO_BP	GO:0010837_REGULATION_OF_KERATINOCYTE_PROLIFERATION	2	EPPK1,FGFR2	0.0090214	0.0327477
GO_BP	GO:0098801_REGULATION_OF_RENAL_SYSTEM_PROCESS	2	EMP2,ADIPOQ	0.0090214	0.0327477
GO_BP	GO:0033762_RESPONSE_TO_GLUCAGON	2	PCK1,PRKAR2B	0.0090214	0.0327477
GO_BP	GO:0099177_REGULATION_OF_TRANS_SYNAPTIC_SIGNALING	11	NTF3,RIMS3,CA2,GNAI1,MCTP2,PLCB4,BCHE,CDH1,SNAP25,PRKAR2B,ADIPOQ	0.00918853	0.0327477
GO_BP	GO:0001678_CELLULAR_GLUCOSE_HOMEOSTASIS	5	SLC29A1,PDK3,PRKAA2,PCK1,ANO1	0.00949728	0.0337224
GO_BP	GO:0051960_REGULATION_OF_NERVOUS_SYSTEM_DEVELOPMENT	19	PTPRF,VLDLR,DAAM2,PLXNA4,IDH2,DIXDC1,NTF3,KALRN,ADGRL1,LHX2,FLNA,SEMA6D,GPC4,SEMA6A,HEY2,EYA1,PCP4,SNAP25,ADGRL3	0.00966662	0.0342043
GO_BP	GO:0031532_ACTIN_CYTOSKELETON_REORGANIZATION	4	NTF3,FLNA,BAIAP2L1,NRK	0.00966876	0.0342043
GO_BP	GO:0002062_CHONDROCYTE_DIFFERENTIATION	4	SOX6,ACAN,GREM1,COL11A1	0.00966876	0.0342043
GO_BP	GO:0086010_MEMBRANE_DEPOLARIZATION_DURING_ACTION_POTENTIAL	2	SLMAP,KCNH2	0.00975352	0.0343348
GO_BP	GO:0051973_POSITIVE_REGULATION_OF_TELOMERASE_ACTIVITY	2	PARM1,GREM1	0.00975352	0.0343348
GO_BP	GO:0060041_RETINA_DEVELOPMENT_IN_CAMERA_TYPE_EYE	5	RPE65,TUB,COL4A1,LHX2,MYH10	0.00980255	0.0344651
GO_BP	GO:0086003_CARDIAC_MUSCLE_CELL_CONTRACTION	3	GJC1,KCNH2,FLNA	0.00986058	0.0345421
GO_BP	GO:1903779_REGULATION_OF_CARDIAC_CONDUCTION	3	ITPR1,FLNA,CASQ2	0.00986058	0.0345421
GO_BP	GO:0099072_REGULATION_OF_POSTSYNAPTIC_MEMBRANE_NEUROTRANSMITTER_RECEPTOR_LEVELS	3	GPC4,ADAM22,SNAP25	0.00986058	0.0345421
GO_BP	GO:0043269_REGULATION_OF_ION_TRANSPORT	15	MYLK,KCNQ4,KCNMB1,SLMAP,FHL1,JPH2,HSPA2,CA2,KCNH2,FLNA,CASQ2,MAOB,CES1,PLPP4,MMP9	0.0102675	0.0358799
GO_BP	GO:0070373_NEGATIVE_REGULATION_OF_ERK1_AND_ERK2_CASCADE	3	EMILIN1,SEMA6A,ADIPOQ	0.0103686	0.0361309
GO_BP	GO:0090077_FOAM_CELL_DIFFERENTIATION	2	LPL,ADIPOQ	0.0105193	0.0361309
GO_BP	GO:1905314_SEMI_LUNAR_VALVE_DEVELOPMENT	2	EMILIN1,HEY2	0.0105193	0.0361309
GO_BP	GO:0046890_REGULATION_OF_LIPID_BIOSYNTHETIC_PROCESS	6	SORBS1,PRKAA2,PCK1,THRSP,ADIPOQ,CES1	0.0106497	0.0361309
GO_BP	GO:0010817_REGULATION_OF_HORMONE_LEVELS	12	ITPR1,KALRN,RPE65,HSD17B6,ACVR1C,GHR,ANO1,CPE,INHBA,SNAP25,ADIPOQ,CES1	0.0108256	0.0362827
GO_BP	GO:0007229_INTEGRIN_MEDIATED_SIGNALING_PATHWAY	4	EMP2,ITGA7,FLNA,ITGA8	0.010838	0.0362827
GO_BP	GO:0031589_CELL_SUBSTRATE_ADHESION	9	ACTN1,SORBS1,EMILIN1,EMP2,ITGA7,FLNA,ANGPT1,ITGA8,GREM1	0.010892	0.0363828
GO_BP	GO:0014909_SMOOTH_MUSCLE_CELL_MIGRATION	3	SEMA6D,MYOCD,ADIPOQ	0.0108933	0.0363828
GO_BP	GO:0050890_COGNITION	8	VLDLR,TANC1,NTF3,KALRN,ITGA8,BCHE,SNAP25,PRKAR2B	0.0111077	0.0370559
GO_BP	GO:0042303_MOLTING_CYCLE	4	LRIG1,LHX2,FGFR2,INHBA	0.0112483	0.0373945
GO_BP	GO:0007190_ACTIVATION_OF_ADENYLATE_CYCLASE_ACTIVITY	2	EDNRA,CAP2	0.0113189	0.0374988
GO_BP	GO:0042417_DOPAMINE_METABOLIC_PROCESS	2	MAOA,MAOB	0.0113189	0.0374988
GO_BP	GO:0014037_SCHWANN_CELL_DIFFERENTIATION	2	GPC1,ADAM22	0.0113189	0.0374988
GO_BP	GO:0034763_NEGATIVE_REGULATION_OF_TRANSMEMBRANE_TRANSPORT	4	ENPP1,KCNH2,CASQ2,MMP9	0.0116691	0.0385255
GO_BP	GO:0050805_NEGATIVE_REGULATION_OF_SYNAPTIC_TRANSMISSION	3	GNAI1,BCHE,ADIPOQ	0.0119933	0.0394596
GO_BP	GO:1901021_POSITIVE_REGULATION_OF_CALCIUM_ION_TRANSMEMBRANE_TRANSPORTER_ACTIVITY	2	JPH2,HSPA2	0.0121527	0.0394597
GO_BP	GO:2000249_REGULATION_OF_ACTIN_CYTOSKELETON_REORGANIZATION	2	NTF3,BAIAP2L1	0.0121527	0.0394597
GO_BP	GO:0009268_RESPONSE_TO_PH	2	CA2,PCK1	0.0121527	0.0394597
GO_BP	GO:0061572_ACTIN_FILAMENT_BUNDLE_ORGANIZATION	5	ACTN1,SORBS1,FLNA,PAWR,BAIAP2L1	0.0125009	0.0395425
GO_BP	GO:0072657_PROTEIN_LOCALIZATION_TO_MEMBRANE	14	SORBS1,GPC1,TUB,SLMAP,EMP2,FLNA,NFASC,GPC4,ADAM22,CPE,CDH1,REEP1,SNAP25,ADIPOQ	0.0126736	0.0399567
GO_BP	GO:0072210_METANEPHRIC_NEPHRON_DEVELOPMENT	2	ADIPOQ,GREM1	0.0130209	0.0407826
GO_BP	GO:0090184_POSITIVE_REGULATION_OF_KIDNEY_DEVELOPMENT	2	ADIPOQ,GREM1	0.0130209	0.0407826
GO_BP	GO:0010658_STRIATED_MUSCLE_CELL_APOPTOTIC_PROCESS	2	MYOCD,HEY2	0.0130209	0.0407826
GO_BP	GO:0030282_BONE_MINERALIZATION	4	ENPP1,SLC24A3,FGFR2,GREM1	0.0134592	0.0420636
GO_BP	GO:0048678_RESPONSE_TO_AXON_INJURY	3	PTPRF,TNC,MATN2	0.0137728	0.0429502
GO_BP	GO:0048286_LUNG_ALVEOLUS_DEVELOPMENT	2	FGFR2,MYOCD	0.0139236	0.042982
GO_BP	GO:0030808_REGULATION_OF_NUCLEOTIDE_BIOSYNTHETIC_PROCESS	2	PDK3,AK4	0.0139236	0.042982
GO_BP	GO:0071548_RESPONSE_TO_DEXAMETHASONE	2	PCK1,FBXO32	0.0139236	0.042982
GO_BP	GO:0001764_NEURON_MIGRATION	5	FLNA,SEMA6A,MYH10,MATN2,ADGRL3	0.014029	0.042982
GO_BP	GO:0009792_EMBRYO_DEVELOPMENT_ENDING_IN_BIRTH_OR_EGG_HATCHING	14	SHROOM3,ACVR1C,EDNRA,LHX2,SOX6,ANGPT1,FGFR2,HEY2,NXN,EYA1,MYH10,NRK,PLPP4,COL11A1	0.0142357	0.042982
GO_BP	GO:0061448_CONNECTIVE_TISSUE_DEVELOPMENT	7	ACTA2,SOX6,ACAN,TNMD,CHRDL2,GREM1,COL11A1	0.014245	0.042982
GO_BP	GO:0050877_NERVOUS_SYSTEM_PROCESS	21	VLDLR,TANC1,KCNQ4,NTF3,LRIG1,KALRN,SLC29A1,RPE65,TUB,GJC1,NFASC,ITGA8,ANO1,EYA1,MYH10,BCHE,GNAL,HOXC10,SNAP25,PRKAR2B,COL11A1	0.014517	0.0437034
GO_BP	GO:0098742_CELL_CELL_ADHESION_VIA_PLASMA_MEMBRANE_ADHESION_MOLECULES	7	PTPRF,ADGRL1,FAT3,GPC4,CDH1,ADGRL3,ADIPOQ	0.0145521	0.0437629
GO_BP	GO:0032924_ACTIVIN_RECEPTOR_SIGNALING_PATHWAY	2	ACVR1C,INHBA	0.014861	0.0440458
GO_BP	GO:0031670_CELLULAR_RESPONSE_TO_NUTRIENT	2	LPL,TNC	0.014861	0.0440458
GO_BP	GO:0044091_MEMBRANE_BIOGENESIS	2	EMP2,CAV2	0.014861	0.0440458
GO_BP	GO:0030517_NEGATIVE_REGULATION_OF_AXON_EXTENSION	2	SEMA6D,SEMA6A	0.014861	0.0440458
GO_BP	GO:2001258_NEGATIVE_REGULATION_OF_CATION_CHANNEL_ACTIVITY	2	CASQ2,MMP9	0.014861	0.0440458
GO_BP	GO:0001937_NEGATIVE_REGULATION_OF_ENDOTHELIAL_CELL_PROLIFERATION	2	CAV2,TNMD	0.014861	0.0440458
GO_BP	GO:0014014_NEGATIVE_REGULATION_OF_GLIOGENESIS	2	DAAM2,IDH2	0.014861	0.0440458
GO_BP	GO:0090317_NEGATIVE_REGULATION_OF_INTRACELLULAR_PROTEIN_TRANSPORT	2	ANGPT1,ADIPOQ	0.014861	0.0440458
GO_BP	GO:0090278_NEGATIVE_REGULATION_OF_PEPTIDE_HORMONE_SECRETION	2	KALRN,ACVR1C	0.014861	0.0440458
GO_BP	GO:0001504_NEUROTRANSMITTER_UPTAKE	2	SLC29A1,SNAP25	0.014861	0.0440458
GO_BP	GO:1904591_POSITIVE_REGULATION_OF_PROTEIN_IMPORT	2	FLNA,CDH1	0.014861	0.0440458
GO_BP	GO:1905521_REGULATION_OF_MACROPHAGE_MIGRATION	2	CD9,EMILIN1	0.014861	0.0440458
GO_BP	GO:0021762_SUBSTANTIA_NIGRA_DEVELOPMENT	2	CKB,MAOB	0.014861	0.0440458
GO_BP	GO:0021675_NERVE_DEVELOPMENT	3	PLXNA4,NTF3,LRIG1	0.0150475	0.0445523
GO_BP	GO:0060538_SKELETAL_MUSCLE_ORGAN_DEVELOPMENT	5	GPC1,CAV2,MYOCD,ASB2,RBM24	0.0152575	0.0451276
GO_BP	GO:0006811_ION_TRANSPORT	29	MYLK,ITPR1,KCNQ4,SLC6A8,KCNMB1,SLMAP,FHL1,JPH2,KCNK3,HSPA2,PLP2,GJC1,CA2,ENPP1,KCNH2,FLNA,HEPH,CASQ2,PRKAA2,SLC24A3,ANO1,THRSP,SNAP25,MAOB,CA12,CA3,CES1,PLPP4,MMP9	0.0155147	0.0457468
GO_BP	GO:0051493_REGULATION_OF_CYTOSKELETON_ORGANIZATION	12	IQCJ-SCHIP1,DIXDC1,LMOD1,NTF3,CDC42EP3,FLNA,CAPN6,PRKAA2,GNAI1,BAIAP2L1,TMSB15A,CYFIP2	0.0155629	0.0458418
GO_BP	GO:0097178_RUFFLE_ASSEMBLY	2	CSPG4,ARHGEF26	0.0158334	0.0459295
GO_BP	GO:0060412_VENTRICULAR_SEPTUM_MORPHOGENESIS	2	FGFR2,HEY2	0.0158334	0.0459295
GO_BP	GO:0061982_MEIOSIS_I_CELL_CYCLE_PROCESS	4	HSPA2,MYBL1,CCNE2,ZNF711	0.015946	0.0459295
GO_BP	GO:0007613_MEMORY	4	VLDLR,NTF3,KALRN,ITGA8	0.015946	0.0459295
GO_BP	GO:0050954_SENSORY_PERCEPTION_OF_MECHANICAL_STIMULUS	5	KCNQ4,LRIG1,TUB,EYA1,COL11A1	0.0161168	0.0459295
GO_BP	GO:1903350_RESPONSE_TO_DOPAMINE	3	FLNA,CAV2,GNAL	0.0163942	0.0465233
GO_BP	GO:0015980_ENERGY_DERIVATION_BY_OXIDATION_OF_ORGANIC_COMPOUNDS	7	IDH2,SORBS1,PPP1R3B,GYG2,ENPP1,PPP1R3C,PPP1R1A	0.0168378	0.0475552
GO_BP	GO:2001239_REGULATION_OF_EXTRINSIC_APOPTOTIC_SIGNALING_PATHWAY_IN_ABSENCE_OF_LIGAND	2	EYA1,INHBA	0.0168407	0.0475552
GO_BP	GO:0003254_REGULATION_OF_MEMBRANE_DEPOLARIZATION	2	SLMAP,FHL1	0.0168407	0.0475552
GO_BP	GO:2001222_REGULATION_OF_NEURON_MIGRATION	2	FLNA,SEMA6A	0.0168407	0.0475552
GO_BP	GO:0048675_AXON_EXTENSION	4	PLXNA4,LHX2,SEMA6D,SEMA6A	0.0170209	0.0479696
GO_BP	GO:0008154_ACTIN_POLYMERIZATION_OR_DEPOLYMERIZATION	6	LMOD1,CDC42EP3,CAP2,BAIAP2L1,TMSB15A,CYFIP2	0.0173878	0.0488597
GO_BP	GO:1990138_NEURON_PROJECTION_EXTENSION	5	PLXNA4,LHX2,SEMA6D,SEMA6A,CYFIP2	0.0174675	0.0490356
GO_BP	GO:0046883_REGULATION_OF_HORMONE_SECRETION	7	ITPR1,KALRN,ACVR1C,ANO1,INHBA,SNAP25,ADIPOQ	0.017536	0.0491796
GO_BP	GO:0010035_RESPONSE_TO_INORGANIC_SUBSTANCE	12	CD9,KCNMB1,KCNK3,CA2,CASQ2,PRKAA2,SDC1,GGH,CDH1,PAWR,MAOB,MMP9	0.0176093	0.0492889
GO_BP	GO:0009914_HORMONE_TRANSPORT	8	ITPR1,KALRN,ACVR1C,ANO1,CPE,INHBA,SNAP25,ADIPOQ	0.0176604	0.0493836
GO_BP	GO:0003197_ENDOCARDIAL_CUSHION_DEVELOPMENT	2	HEY2,RBM24	0.0178832	0.0494801
GO_BP	GO:0061458_REPRODUCTIVE_SYSTEM_DEVELOPMENT	10	ADAM19,LDOC1,FLNA,FGFR2,MYOCD,SDC1,HEY2,TNC,INHBA,NRK	0.0179119	0.0494801
GO_BP	GO:0051101_REGULATION_OF_DNA_BINDING	4	LHX2,MYOCD,HEY2,MMP9	0.0181429	0.0494801
GO_BP	GO:0006631_FATTY_ACID_METABOLIC_PROCESS	9	ACOT1,LPL,HACD1,PDK3,PRKAA2,PCK1,PRKAR2B,ADIPOQ,CES1	0.018461	0.0502034
GO_BP	GO:0032147_ACTIVATION_OF_PROTEIN_KINASE_ACTIVITY	8	CSPG4,NTF3,EMP2,ANGPT1,GHR,PRKAR2B,NRK,GREM1	0.0186435	0.0506038
GO_BP	GO:0048483_AUTONOMIC_NERVOUS_SYSTEM_DEVELOPMENT	2	PLXNA4,EDNRA	0.0189609	0.0511747
GO_BP	GO:0042398_CELLULAR_MODIFIED_AMINO_ACID_BIOSYNTHETIC_PROCESS	2	CKB,CKMT2	0.0189609	0.0511747
GO_BP	GO:0030574_COLLAGEN_CATABOLIC_PROCESS	2	COL15A1,MMP9	0.0189609	0.0511747
GO_BP	GO:0043616_KERATINOCYTE_PROLIFERATION	2	EPPK1,FGFR2	0.0189609	0.0511747
GO_BP	GO:0007140_MALE_MEIOTIC_NUCLEAR_DIVISION	2	HSPA2,MYBL1	0.0189609	0.0511747
GO_BP	GO:0010862_POSITIVE_REGULATION_OF_PATHWAY_RESTRICTED_SMAD_PROTEIN_PHOSPHORYLATION	2	RBPMS,INHBA	0.0189609	0.0511747
GO_BP	GO:0048041_FOCAL_ADHESION_ASSEMBLY	3	ACTN1,SORBS1,GREM1	0.0193086	0.0518531
GO_BP	GO:0014812_MUSCLE_CELL_MIGRATION	3	SEMA6D,MYOCD,ADIPOQ	0.0193086	0.0518531
GO_BP	GO:0003014_RENAL_SYSTEM_PROCESS	4	MCAM,EMP2,PRKAR2B,ADIPOQ	0.0193127	0.0518531
GO_BP	GO:0060562_EPITHELIAL_TUBE_MORPHOGENESIS	8	SHROOM3,COL4A1,EDNRA,LHX2,FGFR2,TNC,EYA1,GREM1	0.0193207	0.0518531
GO_BP	GO:0007595_LACTATION	2	KALRN,SLC29A1	0.0200738	0.0530062
GO_BP	GO:0120163_NEGATIVE_REGULATION_OF_COLD_INDUCED_THERMOGENESIS	2	HOXC10,ADIPOQ	0.0200738	0.0530062
GO_BP	GO:0051972_REGULATION_OF_TELOMERASE_ACTIVITY	2	PARM1,GREM1	0.0200738	0.0530062
GO_BP	GO:0021517_VENTRAL_SPINAL_CORD_DEVELOPMENT	2	VLDLR,HOXC10	0.0200738	0.0530062
GO_BP	GO:0030900_FOREBRAIN_DEVELOPMENT	9	PLXNA4,DIXDC1,LHX2,FLNA,SSTR1,FGFR2,MYH10,CDH1,INHBA	0.0206795	0.0539851
GO_BP	GO:0010001_GLIAL_CELL_DIFFERENTIATION	6	CD9,DAAM2,GPC1,TSPAN2,SOX6,ADAM22	0.0207789	0.054146
GO_BP	GO:0048705_SKELETAL_SYSTEM_MORPHOGENESIS	6	SOX6,ACAN,FGFR2,EYA1,GREM1,COL11A1	0.0207789	0.054146
GO_BP	GO:0035418_PROTEIN_LOCALIZATION_TO_SYNAPSE	3	GPC4,ADAM22,SNAP25	0.0208783	0.0542572
GO_BP	GO:0008589_REGULATION_OF_SMOOTHENED_SIGNALING_PATHWAY	3	ENPP1,FGFR2,SCUBE3	0.0208783	0.0542572
GO_BP	GO:0033344_CHOLESTEROL_EFFLUX	2	ADIPOQ,CES1	0.021222	0.0549017
GO_BP	GO:0042304_REGULATION_OF_FATTY_ACID_BIOSYNTHETIC_PROCESS	2	PRKAA2,ADIPOQ	0.021222	0.0549017
GO_BP	GO:0051899_MEMBRANE_DEPOLARIZATION	3	SLMAP,FHL1,KCNH2	0.0216917	0.0559654
GO_BP	GO:0072659_PROTEIN_LOCALIZATION_TO_PLASMA_MEMBRANE	7	SORBS1,SLMAP,EMP2,FLNA,NFASC,CDH1,ADIPOQ	0.0217521	0.0560708
GO_BP	GO:0055085_TRANSMEMBRANE_TRANSPORT	27	SORT1,ITPR1,SORBS1,KCNQ4,SLC6A8,SLC29A1,KCNMB1,SLMAP,FHL1,JPH2,KCNK3,HSPA2,PLP2,GJC1,CA2,EDNRA,ENPP1,KCNH2,FLNA,CASQ2,PRKAA2,SLC24A3,ANO1,THRSP,SNAP25,ADIPOQ,MMP9	0.022157	0.0567856
GO_BP	GO:0060711_LABYRINTHINE_LAYER_DEVELOPMENT	2	FGFR2,HEY2	0.0224056	0.0567856
GO_BP	GO:0002762_NEGATIVE_REGULATION_OF_MYELOID_LEUKOCYTE_DIFFERENTIATION	2	INHBA,ADIPOQ	0.0224056	0.0567856
GO_BP	GO:0030850_PROSTATE_GLAND_DEVELOPMENT	2	FGFR2,TNC	0.0224056	0.0567856
GO_BP	GO:0061383_TRABECULA_MORPHOGENESIS	2	HEY2,GREM1	0.0224056	0.0567856
GO_BP	GO:0030001_METAL_ION_TRANSPORT	17	MYLK,ITPR1,KCNQ4,SLC6A8,KCNMB1,SLMAP,FHL1,JPH2,KCNK3,HSPA2,KCNH2,FLNA,HEPH,CASQ2,SLC24A3,SNAP25,PLPP4	0.0224364	0.0567856
GO_BP	GO:0001508_ACTION_POTENTIAL	4	SLMAP,GJC1,KCNH2,FLNA	0.0224511	0.0567856
GO_BP	GO:0033865_NUCLEOSIDE_BISPHOSPHATE_METABOLIC_PROCESS	4	ACOT1,HACD1,ENPP1,PDK3	0.0224511	0.0567856
GO_BP	GO:0072175_EPITHELIAL_TUBE_FORMATION	4	SHROOM3,LHX2,FGFR2,GREM1	0.023116	0.0581244
GO_BP	GO:0051248_NEGATIVE_REGULATION_OF_PROTEIN_METABOLIC_PROCESS	20	PPP1R14A,WFDC1,NTF3,EMILIN1,RGS3,ITIH5,PI15,ENPP1,FLNA,ANGPT1,PRKAA2,MYOCD,SEMA6A,NXN,PPP1R1A,PRKAR2B,RBM24,ADIPOQ,GREM1,MMP9	0.0232986	0.0584808
GO_BP	GO:0090066_REGULATION_OF_ANATOMICAL_STRUCTURE_SIZE	11	PLXNA4,LMOD1,KCNMB1,ACTA2,EDNRA,CDC42EP3,SEMA6D,SEMA6A,BAIAP2L1,TMSB15A,CYFIP2	0.0235977	0.0588133
GO_BP	GO:0023056_POSITIVE_REGULATION_OF_SIGNALING	31	CSPG4,IQCJ-SCHIP1,DAAM2,DIXDC1,SORBS1,NTF3,LPL,RIMS3,JPH2,EMP2,TGFB1I1,CA2,FLNA,CAV2,RBPMS,MAOA,ANGPT1,ITGA8,GHR,FGFR2,MYOCD,ANO1,TPD52L1,INHBA,SNAP25,SCUBE3,NRK,ADIPOQ,CYFIP2,GREM1,MMP9	0.0236225	0.0588133
GO_BP	GO:0021879_FOREBRAIN_NEURON_DIFFERENTIATION	2	FGFR2,INHBA	0.0236245	0.0588133
GO_BP	GO:0098900_REGULATION_OF_ACTION_POTENTIAL	2	SLMAP,FLNA	0.0236245	0.0588133
GO_BP	GO:0046850_REGULATION_OF_BONE_REMODELING	2	CA2,GREM1	0.0236245	0.0588133
GO_BP	GO:0032330_REGULATION_OF_CHONDROCYTE_DIFFERENTIATION	2	SOX6,GREM1	0.0236245	0.0588133
GO_BP	GO:0010883_REGULATION_OF_LIPID_STORAGE	2	LPL,CES1	0.0236245	0.0588133
GO_BP	GO:0071901_NEGATIVE_REGULATION_OF_PROTEIN_SERINE_THREONINE_KINASE_ACTIVITY	4	RGS3,MYOCD,PRKAR2B,ADIPOQ	0.0237937	0.0591543
GO_BP	GO:0001505_REGULATION_OF_NEUROTRANSMITTER_LEVELS	6	SLC29A1,RIMS3,MAOA,MCTP2,SNAP25,MAOB	0.0241029	0.0598194
GO_BP	GO:0001892_EMBRYONIC_PLACENTA_DEVELOPMENT	3	FGFR2,HEY2,NRK	0.0242472	0.0600735
GO_BP	GO:0048589_DEVELOPMENTAL_GROWTH	13	CD9,PLXNA4,EPPK1,ACVR1C,LHX2,SEMA6D,GHR,FGFR2,SEMA6A,HEY2,TNC,NRK,CYFIP2	0.0245061	0.0603762
GO_BP	GO:0006584_CATECHOLAMINE_METABOLIC_PROCESS	2	MAOA,MAOB	0.0248787	0.0603865
GO_BP	GO:0045912_NEGATIVE_REGULATION_OF_CARBOHYDRATE_METABOLIC_PROCESS	2	ENPP1,ADIPOQ	0.0248787	0.0603865
GO_BP	GO:0043949_REGULATION_OF_CAMP_MEDIATED_SIGNALING	2	GNAI1,PRKAR2B	0.0248787	0.0603865
GO_BP	GO:0098773_SKIN_EPIDERMIS_DEVELOPMENT	3	LHX2,FGFR2,INHBA	0.0251377	0.0608609
GO_BP	GO:0008217_REGULATION_OF_BLOOD_PRESSURE	5	EMP2,ACTA2,EDNRA,ADIPOQ,CES1	0.025996	0.0628255
GO_BP	GO:0034766_NEGATIVE_REGULATION_OF_ION_TRANSMEMBRANE_TRANSPORT	3	KCNH2,CASQ2,MMP9	0.0260478	0.0628255
GO_BP	GO:0110149_REGULATION_OF_BIOMINERALIZATION	3	ENPP1,HEY2,GREM1	0.0260478	0.0628255
GO_BP	GO:0071320_CELLULAR_RESPONSE_TO_CAMP	2	PCK1,ADIPOQ	0.0261681	0.0628255
GO_BP	GO:0060425_LUNG_MORPHOGENESIS	2	FGFR2,TNC	0.0261681	0.0628255
GO_BP	GO:0009311_OLIGOSACCHARIDE_METABOLIC_PROCESS	2	ST6GAL2,ST6GALNAC5	0.0261681	0.0628255
GO_BP	GO:0034381_PLASMA_LIPOPROTEIN_PARTICLE_CLEARANCE	2	VLDLR,ADIPOQ	0.0261681	0.0628255
GO_BP	GO:1990089_RESPONSE_TO_NERVE_GROWTH_FACTOR	2	SORT1,NTF3	0.0261681	0.0628255
GO_BP	GO:0035384_THIOESTER_BIOSYNTHETIC_PROCESS	2	HACD1,PDK3	0.0261681	0.0628255
GO_BP	GO:0033500_CARBOHYDRATE_HOMEOSTASIS	6	SLC29A1,PDK3,PRKAA2,PCK1,ANO1,ADIPOQ	0.0266901	0.064025
GO_BP	GO:0048010_VASCULAR_ENDOTHELIAL_GROWTH_FACTOR_RECEPTOR_SIGNALING_PATHWAY	3	EMILIN1,TNMD,CYFIP2	0.0269774	0.0640769
GO_BP	GO:0044272_SULFUR_COMPOUND_BIOSYNTHETIC_PROCESS	5	CSPG4,HACD1,PDK3,ANGPT1,ACAN	0.0272265	0.064132
GO_BP	GO:0050879_MULTICELLULAR_ORGANISMAL_MOVEMENT	2	SYNM,ITPR1	0.0274929	0.0644947
GO_BP	GO:0043392_NEGATIVE_REGULATION_OF_DNA_BINDING	2	LHX2,HEY2	0.0274929	0.0644947
GO_BP	GO:2000179_POSITIVE_REGULATION_OF_NEURAL_PRECURSOR_CELL_PROLIFERATION	2	LHX2,FLNA	0.0274929	0.0644947
GO_BP	GO:0030832_REGULATION_OF_ACTIN_FILAMENT_LENGTH	5	LMOD1,CDC42EP3,BAIAP2L1,TMSB15A,CYFIP2	0.027856	0.0652398
GO_BP	GO:0051591_RESPONSE_TO_CAMP	3	SDC1,PCK1,ADIPOQ	0.0279267	0.065299
GO_BP	GO:0051174_REGULATION_OF_PHOSPHORUS_METABOLIC_PROCESS	30	CSPG4,VLDLR,PPP1R14A,NTF3,PPP1R3B,EMILIN1,SPOCD1,EMP2,HSPA2,RGS3,ENPP1,PDK3,CAV2,RBPMS,AK4,ANGPT1,PRKAA2,GHR,FGFR2,MYOCD,SEMA6A,CCNE2,PPP1R1A,TPD52L1,INHBA,PRKAR2B,NRK,ADIPOQ,GREM1,MMP9	0.0280871	0.0656204
GO_BP	GO:0015672_MONOVALENT_INORGANIC_CATION_TRANSPORT	11	KCNQ4,SLC6A8,KCNMB1,SLMAP,FHL1,KCNK3,KCNH2,FLNA,CASQ2,SLC24A3,SNAP25	0.028324	0.0660663
GO_BP	GO:0021515_CELL_DIFFERENTIATION_IN_SPINAL_CORD	2	SOX6,HOXC10	0.0288528	0.066973
GO_BP	GO:1901862_NEGATIVE_REGULATION_OF_MUSCLE_TISSUE_DEVELOPMENT	2	SOX6,MYOCD	0.0288528	0.066973
GO_BP	GO:0032371_REGULATION_OF_STEROL_TRANSPORT	2	ADIPOQ,CES1	0.0288528	0.066973
GO_BP	GO:0019217_REGULATION_OF_FATTY_ACID_METABOLIC_PROCESS	3	PDK3,PRKAA2,ADIPOQ	0.0288958	0.0670185
GO_BP	GO:0045860_POSITIVE_REGULATION_OF_PROTEIN_KINASE_ACTIVITY	11	CSPG4,VLDLR,NTF3,EMP2,ANGPT1,GHR,TPD52L1,PRKAR2B,NRK,ADIPOQ,GREM1	0.0290516	0.0672169
GO_BP	GO:0061326_RENAL_TUBULE_DEVELOPMENT	3	COL4A1,EYA1,GREM1	0.0298846	0.0681549
GO_BP	GO:1905517_MACROPHAGE_MIGRATION	2	CD9,EMILIN1	0.0302478	0.0686557
GO_BP	GO:0032387_NEGATIVE_REGULATION_OF_INTRACELLULAR_TRANSPORT	2	ANGPT1,ADIPOQ	0.0302478	0.0686557
GO_BP	GO:1901016_REGULATION_OF_POTASSIUM_ION_TRANSMEMBRANE_TRANSPORTER_ACTIVITY	2	FHL1,CASQ2	0.0302478	0.0686557
GO_BP	GO:0031529_RUFFLE_ORGANIZATION	2	CSPG4,ARHGEF26	0.0302478	0.0686557
GO_BP	GO:0043271_NEGATIVE_REGULATION_OF_ION_TRANSPORT	4	KCNH2,CASQ2,MAOB,MMP9	0.0304718	0.0690551
GO_BP	GO:0034765_REGULATION_OF_ION_TRANSMEMBRANE_TRANSPORT	10	KCNQ4,KCNMB1,SLMAP,FHL1,JPH2,HSPA2,KCNH2,FLNA,CASQ2,MMP9	0.0308199	0.0697887
GO_BP	GO:0048704_EMBRYONIC_SKELETAL_SYSTEM_MORPHOGENESIS	3	FGFR2,EYA1,COL11A1	0.0308932	0.0698444
GO_BP	GO:0007218_NEUROPEPTIDE_SIGNALING_PATHWAY	3	SORT1,SSTR1,CPE	0.0308932	0.0698444
GO_BP	GO:0007043_CELL_CELL_JUNCTION_ASSEMBLY	4	CD9,MPP7,GJC1,NFASC	0.0312794	0.0706063
GO_BP	GO:0051592_RESPONSE_TO_CALCIUM_ION	4	KCNMB1,CASQ2,PRKAA2,SDC1	0.0312794	0.0706063
GO_BP	GO:0006790_SULFUR_COMPOUND_METABOLIC_PROCESS	8	CSPG4,ACOT1,HACD1,ENPP1,PDK3,ANGPT1,ACAN,GHR	0.0317289	0.0710653
GO_BP	GO:0023061_SIGNAL_RELEASE	12	ITPR1,KALRN,LPL,RIMS3,ACVR1C,ANO1,MCTP2,CPE,INHBA,SNAP25,ADIPOQ,MAOB	0.0317618	0.0710653
GO_BP	GO:0046364_MONOSACCHARIDE_BIOSYNTHETIC_PROCESS	3	PCK1,ENO2,ADIPOQ	0.0319217	0.0710653
GO_BP	GO:0051216_CARTILAGE_DEVELOPMENT	5	SOX6,ACAN,CHRDL2,GREM1,COL11A1	0.0325326	0.0716867
GO_BP	GO:0002027_REGULATION_OF_HEART_RATE	3	KCNH2,CASQ2,HEY2	0.0329701	0.0723174
GO_BP	GO:0035383_THIOESTER_METABOLIC_PROCESS	3	ACOT1,HACD1,PDK3	0.0329701	0.0723174
GO_BP	GO:0098655_CATION_TRANSMEMBRANE_TRANSPORT	16	ITPR1,KCNQ4,SLC6A8,KCNMB1,SLMAP,FHL1,JPH2,KCNK3,HSPA2,KCNH2,FLNA,CASQ2,SLC24A3,ANO1,SNAP25,MMP9	0.033504	0.0733762
GO_BP	GO:0062013_POSITIVE_REGULATION_OF_SMALL_MOLECULE_METABOLIC_PROCESS	4	SORBS1,PRKAA2,ADIPOQ,CES1	0.0337823	0.0739294
GO_BP	GO:0034220_ION_TRANSMEMBRANE_TRANSPORT	20	ITPR1,KCNQ4,SLC6A8,KCNMB1,SLMAP,FHL1,JPH2,KCNK3,HSPA2,PLP2,GJC1,KCNH2,FLNA,CASQ2,PRKAA2,SLC24A3,ANO1,THRSP,SNAP25,MMP9	0.0346085	0.0751183
GO_BP	GO:0030838_POSITIVE_REGULATION_OF_ACTIN_FILAMENT_POLYMERIZATION	3	LMOD1,CDC42EP3,BAIAP2L1	0.0351268	0.075603
GO_BP	GO:0035148_TUBE_FORMATION	4	SHROOM3,LHX2,FGFR2,GREM1	0.0355182	0.076388
GO_BP	GO:0050730_REGULATION_OF_PEPTIDYL_TYROSINE_PHOSPHORYLATION	6	CSPG4,NTF3,ANGPT1,GHR,ADIPOQ,GREM1	0.0355714	0.0764451
GO_BP	GO:0060341_REGULATION_OF_CELLULAR_LOCALIZATION	18	ITPR1,SORBS1,GPC1,RIMS3,JPH2,KCNH2,FLNA,CASQ2,ANGPT1,PRKAA2,GPC4,CCNE2,ANO1,GNAI1,MCTP2,CDH1,REEP1,ADIPOQ	0.0359303	0.077101
GO_BP	GO:0021872_FOREBRAIN_GENERATION_OF_NEURONS	2	FGFR2,INHBA	0.0361765	0.0774079
GO_BP	GO:0032722_POSITIVE_REGULATION_OF_CHEMOKINE_PRODUCTION	2	LPL,ADIPOQ	0.0361765	0.0774079
GO_BP	GO:0051963_REGULATION_OF_SYNAPSE_ASSEMBLY	3	ADGRL1,GPC4,ADGRL3	0.0362352	0.0774079
GO_BP	GO:0006641_TRIGLYCERIDE_METABOLIC_PROCESS	3	LPL,PCK1,THRSP	0.0362352	0.0774079
GO_BP	GO:1904950_NEGATIVE_REGULATION_OF_ESTABLISHMENT_OF_PROTEIN_LOCALIZATION	4	IDH2,ACVR1C,ANGPT1,ADIPOQ	0.0364064	0.077658
GO_BP	GO:0014074_RESPONSE_TO_PURINE_CONTAINING_COMPOUND	4	CASQ2,SDC1,PCK1,ADIPOQ	0.0364064	0.077658
GO_BP	GO:0061351_NEURAL_PRECURSOR_CELL_PROLIFERATION	4	DIXDC1,LHX2,FLNA,FGFR2	0.0373082	0.0788689
GO_BP	GO:0006090_PYRUVATE_METABOLIC_PROCESS	4	PDK3,PRKAA2,PCK1,ENO2	0.0373082	0.0788689
GO_BP	GO:0150115_CELL_SUBSTRATE_JUNCTION_ORGANIZATION	3	ACTN1,SORBS1,GREM1	0.0373636	0.0788689
GO_BP	GO:0021537_TELENCEPHALON_DEVELOPMENT	6	PLXNA4,DIXDC1,LHX2,FLNA,MYH10,INHBA	0.0375566	0.0788689
GO_BP	GO:0043954_CELLULAR_COMPONENT_MAINTENANCE	2	TANC1,MYOCD	0.0377453	0.078987
GO_BP	GO:0003170_HEART_VALVE_DEVELOPMENT	2	EMILIN1,HEY2	0.0377453	0.078987
GO_BP	GO:0030072_PEPTIDE_HORMONE_SECRETION	6	ITPR1,KALRN,ACVR1C,ANO1,CPE,SNAP25	0.0382343	0.0798946
GO_BP	GO:0042391_REGULATION_OF_MEMBRANE_POTENTIAL	9	SLC29A1,SLMAP,FHL1,RIMS3,KCNK3,GJC1,KCNH2,FLNA,CASQ2	0.0382347	0.0798946
GO_BP	GO:1901615_ORGANIC_HYDROXY_COMPOUND_METABOLIC_PROCESS	11	VLDLR,IDH2,ALDH1B1,FAH,RPE65,MAOA,PRKAA2,PCK1,PLCB4,MAOB,CES1	0.0384179	0.0802191
GO_BP	GO:0043279_RESPONSE_TO_ALKALOID	3	CASQ2,BCHE,ADGRL3	0.038512	0.0803571
GO_BP	GO:0006812_CATION_TRANSPORT	20	MYLK,ITPR1,KCNQ4,SLC6A8,KCNMB1,SLMAP,FHL1,JPH2,KCNK3,HSPA2,KCNH2,FLNA,HEPH,CASQ2,SLC24A3,ANO1,SNAP25,MAOB,PLPP4,MMP9	0.0387567	0.0807501
GO_BP	GO:0048857_NEURAL_NUCLEUS_DEVELOPMENT	2	CKB,MAOB	0.0393483	0.0816861
GO_BP	GO:2000756_REGULATION_OF_PEPTIDYL_LYSINE_ACETYLATION	2	PRKAA2,MYOCD	0.0393483	0.0816861
GO_BP	GO:0006940_REGULATION_OF_SMOOTH_MUSCLE_CONTRACTION	2	CNN1,MYOCD	0.0393483	0.0816861
GO_BP	GO:0090087_REGULATION_OF_PEPTIDE_TRANSPORT	13	IDH2,ITPR1,KALRN,LPL,ACVR1C,CA2,FLNA,ANGPT1,ANO1,MYH10,CDH1,SNAP25,ADIPOQ	0.0394537	0.0818457
GO_BP	GO:0007009_PLASMA_MEMBRANE_ORGANIZATION	3	CAV2,MYH10,BAIAP2L1	0.0396806	0.082179
GO_BP	GO:0060284_REGULATION_OF_CELL_DEVELOPMENT	17	PTPRF,VLDLR,DAAM2,PLXNA4,IDH2,DIXDC1,NTF3,KALRN,LHX2,FLNA,SEMA6D,SEMA6A,HEY2,EYA1,PCP4,SNAP25,ADIPOQ	0.0398055	0.082179
GO_BP	GO:0051347_POSITIVE_REGULATION_OF_TRANSFERASE_ACTIVITY	13	CSPG4,VLDLR,NTF3,EMP2,PARM1,ANGPT1,GHR,FGFR2,TPD52L1,PRKAR2B,NRK,ADIPOQ,GREM1	0.0402793	0.082179
GO_BP	GO:0022604_REGULATION_OF_CELL_MORPHOGENESIS	10	PLXNA4,KALRN,FBLIM1,SHROOM3,ITGA7,CDC42EP3,FLNA,SEMA6D,SEMA6A,MYH10	0.04079	0.08288
GO_BP	GO:0045216_CELL_CELL_JUNCTION_ORGANIZATION	5	CD9,MPP7,GJC1,NFASC,CDH1	0.0408636	0.0829121
GO_BP	GO:0002573_MYELOID_LEUKOCYTE_DIFFERENTIATION	5	TSPAN2,CA2,INHBA,ADIPOQ,MMP9	0.0408636	0.0829121
GO_BP	GO:0043085_POSITIVE_REGULATION_OF_CATALYTIC_ACTIVITY	24	CSPG4,VLDLR,EGLN3,NTF3,KALRN,EMP2,HSPA2,RGS3,CHML,ACVR1C,EDNRA,CAV2,PARM1,ANGPT1,PPP1R12B,GHR,FGFR2,ARHGEF26,TPD52L1,PRKAR2B,NRK,ADIPOQ,CYFIP2,GREM1	0.0409272	0.0829248
GO_BP	GO:0071384_CELLULAR_RESPONSE_TO_CORTICOSTEROID_STIMULUS	2	PCK1,FBXO32	0.0409855	0.0829248
GO_BP	GO:0090307_MITOTIC_SPINDLE_ASSEMBLY	2	KIFC2,FLNA	0.0409855	0.0829248
GO_BP	GO:0051965_POSITIVE_REGULATION_OF_SYNAPSE_ASSEMBLY	2	ADGRL1,ADGRL3	0.0409855	0.0829248
GO_BP	GO:0030902_HINDBRAIN_DEVELOPMENT	4	CKB,FLNA,SSTR1,MYH10	0.0410521	0.0830011
GO_BP	GO:0006066_ALCOHOL_METABOLIC_PROCESS	8	VLDLR,IDH2,ALDH1B1,RPE65,PRKAA2,PCK1,PLCB4,CES1	0.0419783	0.084814
GO_BP	GO:0018958_PHENOL_CONTAINING_COMPOUND_METABOLIC_PROCESS	3	FAH,MAOA,MAOB	0.0420778	0.0849551
GO_BP	GO:0032535_REGULATION_OF_CELLULAR_COMPONENT_SIZE	8	PLXNA4,LMOD1,CDC42EP3,SEMA6D,SEMA6A,BAIAP2L1,TMSB15A,CYFIP2	0.042573	0.0858819
GO_BP	GO:0006081_CELLULAR_ALDEHYDE_METABOLIC_PROCESS	2	IDH2,RPE65	0.0426566	0.0858819
GO_BP	GO:0035308_NEGATIVE_REGULATION_OF_PROTEIN_DEPHOSPHORYLATION	2	PPP1R14A,PPP1R1A	0.0426566	0.0858819
GO_BP	GO:0035305_NEGATIVE_REGULATION_OF_DEPHOSPHORYLATION	3	PPP1R14A,SPOCD1,PPP1R1A	0.0433065	0.0861626
GO_BP	GO:2000278_REGULATION_OF_DNA_BIOSYNTHETIC_PROCESS	3	PARM1,ADIPOQ,GREM1	0.0433065	0.0861626
GO_BP	GO:0043393_REGULATION_OF_PROTEIN_BINDING	5	PTPRF,LDOC1,ANGPT1,ADIPOQ,MMP9	0.0433494	0.086188
GO_BP	GO:0030837_NEGATIVE_REGULATION_OF_ACTIN_FILAMENT_POLYMERIZATION	2	LMOD1,TMSB15A	0.0443615	0.0880173
GO_BP	GO:0048278_VESICLE_DOCKING	2	CAV2,SNAP25	0.0443615	0.0880173
GO_BP	GO:0061387_REGULATION_OF_EXTENT_OF_CELL_GROWTH	3	PLXNA4,SEMA6D,SEMA6A	0.0445553	0.0883408
GO_BP	GO:0062012_REGULATION_OF_SMALL_MOLECULE_METABOLIC_PROCESS	9	SORBS1,PPP1R3B,ENPP1,PDK3,AK4,PRKAA2,PPP1R3C,ADIPOQ,CES1	0.0458759	0.0906637
GO_BP	GO:0048663_NEURON_FATE_COMMITMENT	2	EYA1,HOXC10	0.0460999	0.0906637
GO_BP	GO:0071900_REGULATION_OF_PROTEIN_SERINE_THREONINE_KINASE_ACTIVITY	10	CSPG4,NTF3,RGS3,GHR,MYOCD,CCNE2,TPD52L1,PRKAR2B,NRK,ADIPOQ	0.0465344	0.091026
GO_BP	GO:0016482_CYTOSOLIC_TRANSPORT	4	SORT1,RAB9B,EMP2,CES1	0.0470808	0.0919502
GO_BP	GO:0006633_FATTY_ACID_BIOSYNTHETIC_PROCESS	4	LPL,HACD1,PRKAA2,ADIPOQ	0.0470808	0.0919502
GO_BP	GO:0072009_NEPHRON_EPITHELIUM_DEVELOPMENT	3	EYA1,ADIPOQ,GREM1	0.047113	0.0919505
GO_BP	GO:0032880_REGULATION_OF_PROTEIN_LOCALIZATION	17	IDH2,ITPR1,SORBS1,GPC1,LPL,ACVR1C,FLNA,ANGPT1,PRKAA2,GPC4,CCNE2,ANO1,GNAI1,MYH10,CDH1,SNAP25,ADIPOQ	0.0476139	0.0928649
GO_BP	GO:0016042_LIPID_CATABOLIC_PROCESS	7	HSD17B6,LPL,PCK1,PLIN1,PLCB4,ADIPOQ,CES1	0.0478648	0.0929882
GO_BP	GO:0072171_MESONEPHRIC_TUBULE_MORPHOGENESIS	2	EYA1,GREM1	0.0478716	0.0929882
GO_BP	GO:0033866_NUCLEOSIDE_BISPHOSPHATE_BIOSYNTHETIC_PROCESS	2	HACD1,PDK3	0.0478716	0.0929882
GO_BP	GO:0046824_POSITIVE_REGULATION_OF_NUCLEOCYTOPLASMIC_TRANSPORT	2	FLNA,CDH1	0.0478716	0.0929882
GO_BP	GO:1904377_POSITIVE_REGULATION_OF_PROTEIN_LOCALIZATION_TO_CELL_PERIPHERY	2	SORBS1,GNAI1	0.0478716	0.0929882
GO_BP	GO:0044839_CELL_CYCLE_G2_M_PHASE_TRANSITION	6	FBXL22,FHL1,HSPA2,PPP1R12B,TPD52L1,PRKAR2B	0.0485728	0.0942131
GO_BP	GO:0090276_REGULATION_OF_PEPTIDE_HORMONE_SECRETION	5	ITPR1,KALRN,ACVR1C,ANO1,SNAP25	0.0486007	0.0942131
GO_BP	GO:0110053_REGULATION_OF_ACTIN_FILAMENT_ORGANIZATION	6	LMOD1,CDC42EP3,FLNA,BAIAP2L1,TMSB15A,CYFIP2	0.049373	0.0951318
GO_BP	GO:0019722_CALCIUM_MEDIATED_SIGNALING	5	ITPR1,ADGRL1,JPH2,CASQ2,MCTP2	0.0495124	0.0952724
GO_BP	GO:0003279_CARDIAC_SEPTUM_DEVELOPMENT	3	FGFR2,HEY2,MYH10	0.0497508	0.0954749
GO_BP	GO:0022037_METENCEPHALON_DEVELOPMENT	3	CKB,SSTR1,MYH10	0.0497508	0.0954749
GO_BP	GO:0046822_REGULATION_OF_NUCLEOCYTOPLASMIC_TRANSPORT	3	FLNA,ANGPT1,CDH1	0.0497508	0.0954749
GO_BP	GO:0042325_REGULATION_OF_PHOSPHORYLATION	26	CSPG4,VLDLR,PPP1R14A,NTF3,EMILIN1,EMP2,HSPA2,RGS3,ENPP1,CAV2,RBPMS,AK4,ANGPT1,PRKAA2,GHR,FGFR2,MYOCD,SEMA6A,CCNE2,TPD52L1,INHBA,PRKAR2B,NRK,ADIPOQ,GREM1,MMP9	0.0497925	0.095491
GO_BP	GO:0061061_MUSCLE_STRUCTURE_DEVELOPMENT	33	SORT1,MYLK,CD9,SPEG,CSRP2,TANC1,CSRP1,GPC1,LMOD1,MYH11,ITGB1BP2,FHL1,JPH2,TAGLN,ITGA7,ALPK3,CAV2,SOX6,CASQ2,ITGA8,FGFR2,MYOCD,SDC1,ASB2,HEY2,PGM5,LDB3,MYH10,PDLIM3,RBM24,ACTC1,GREM1,COL11A1	3.39939e-13	9.75284e-10	12	TTN,IGF1,CXCL10,ALPK2,CXCL9,TGFBR3,WNT2,NEBL,LAMA2,PDGFRA,DCN,DKK1	0.00172272	0.00870452
GO_BP	GO:0042692_MUSCLE_CELL_DIFFERENTIATION	23	SORT1,CD9,SPEG,CSRP2,TANC1,CSRP1,LMOD1,MYH11,ALPK3,CAV2,SOX6,CASQ2,ITGA8,FGFR2,MYOCD,SDC1,HEY2,PGM5,LDB3,MYH10,RBM24,ACTC1,GREM1	8.43387e-12	9.67646e-09	8	TTN,IGF1,CXCL10,ALPK2,CXCL9,NEBL,PDGFRA,DKK1	0.00201049	0.00962364
GO_BP	GO:0051146_STRIATED_MUSCLE_CELL_DIFFERENTIATION	20	SORT1,CD9,CSRP2,TANC1,CSRP1,LMOD1,MYH11,ALPK3,CAV2,SOX6,CASQ2,MYOCD,SDC1,HEY2,PGM5,LDB3,MYH10,RBM24,ACTC1,GREM1	1.49947e-11	1.0755e-08	8	TTN,IGF1,CXCL10,ALPK2,CXCL9,NEBL,PDGFRA,DKK1	0.000305638	0.00336626
GO_BP	GO:0010927_CELLULAR_COMPONENT_ASSEMBLY_INVOLVED_IN_MORPHOGENESIS	12	CD9,CSRP2,CSRP1,GPC1,LMOD1,MYH11,NFASC,CASQ2,PGM5,LDB3,MYH10,ACTC1	7.8009e-10	3.19725e-07	4	TTN,NEBL,PDGFRA,EPB41L3	0.00182751	0.00896419
GO_BP	GO:0060537_MUSCLE_TISSUE_DEVELOPMENT	22	MYLK,CSRP2,CSRP1,GPC1,MYH11,JPH2,GJC1,ALPK3,CAV2,SOX6,ITGA8,FGFR2,MYOCD,ASB2,HEY2,PGM5,EYA1,MYH10,RBM24,ACTC1,GREM1,COL11A1	3.03574e-10	1.45159e-07	10	TTN,SEMA3C,IGF1,ALPK2,TGFBR3,WNT2,NEBL,PDGFRA,DCN,DKK1	0.000247447	0.00291424
GO_BP	GO:0030239_MYOFIBRIL_ASSEMBLY	9	CSRP2,CSRP1,LMOD1,MYH11,CASQ2,PGM5,LDB3,MYH10,ACTC1	6.51884e-09	1.87025e-06	3	TTN,NEBL,PDGFRA	0.0018791	0.00914186
GO_BP	GO:0097435_SUPRAMOLECULAR_FIBER_ORGANIZATION	28	CSRP2,ACTN1,SORBS1,CSRP1,LMOD1,TPM2,MYH11,EMILIN1,EPPK1,SHROOM3,EMP2,CDC42EP3,FLNA,CASQ2,ACAN,PGM5,LDB3,CAP2,MYH10,PAWR,BAIAP2L1,TMSB15A,PDLIM3,ACTC1,CYFIP2,DES,GREM1,COL11A1	9.71326e-09	2.53339e-06	13	TTN,LUM,DPT,SFRP2,MFAP5,CXCL12,F2RL1,GAS7,ADAMTS2,LTBP2,NEBL,PDGFRA,TNXB	0.0015269	0.00829336
GO_BP	GO:0055001_MUSCLE_CELL_DEVELOPMENT	13	CSRP2,CSRP1,LMOD1,MYH11,ALPK3,CAV2,CASQ2,SDC1,HEY2,PGM5,LDB3,MYH10,ACTC1	2.01496e-08	4.44685e-06	5	TTN,IGF1,ALPK2,NEBL,PDGFRA	0.00236474	0.0103414
GO_BP	GO:0007517_MUSCLE_ORGAN_DEVELOPMENT	18	MYLK,SPEG,GPC1,ITGB1BP2,FHL1,JPH2,TAGLN,ITGA7,CAV2,SOX6,FGFR2,MYOCD,ASB2,HEY2,RBM24,ACTC1,GREM1,COL11A1	2.24066e-07	3.3834e-05	8	TTN,IGF1,CXCL10,TGFBR3,WNT2,LAMA2,DCN,DKK1	0.00349885	0.0133823
GO_BP	GO:0048646_ANATOMICAL_STRUCTURE_FORMATION_INVOLVED_IN_MORPHOGENESIS	37	CSPG4,MCAM,CD9,CSRP2,ACTN1,TANC1,CSRP1,GPC1,LMOD1,MYH11,COL4A2,EMILIN1,SHROOM3,EMP2,COL4A1,ITGA7,EDNRA,LHX2,NFASC,COL15A1,CASQ2,ANGPT1,ITGA8,FGFR2,SEMA6A,HEY2,PGM5,LDB3,EYA1,COL8A2,MYH10,TNMD,INHBA,ACTC1,GREM1,MMP9,COL11A1	4.76585e-09	1.51925e-06	21	VEGFD,TTN,SEMA3C,CXCL13,SFRP2,CXCL10,SERPINF1,CXCL9,PDPN,TGFBR3,WNT2,NEBL,C3,PDGFRA,KLF4,DCN,EPB41L3,PTGIS,ALDH1A3,FAM20A,DKK1	5.8301e-05	0.00105895
GO_BP	GO:0009719_RESPONSE_TO_ENDOGENOUS_STIMULUS	44	SORT1,CD9,SORBS1,GPC1,NTF3,COL4A2,RPE65,EMILIN1,LPL,TUB,LDOC1,COL4A1,TGFB1I1,ACVR1C,CA2,ENPP1,FLNA,CAV2,SOX6,CASQ2,ITGA8,SSTR1,PRKAA2,GHR,FGFR2,MYOCD,SDC1,PCK1,GGH,TNC,ANO1,GNAI1,BCHE,GNAL,CDH1,FBXO32,TNMD,INHBA,BAIAP2L1,PRKAR2B,ADIPOQ,MAOB,CES1,GREM1	8.18145e-08	1.56484e-05	24	IGF1,CXCL13,SFRP2,MXRA5,CXCL12,SERPINF1,FSTL1,HTR2B,CLEC3B,LRRC32,TGFBR3,LTBP2,PCSK6,WNT2,HAS1,FBN1,DAB2,SMURF2,TRERF1,TFPI,PDGFRA,KLF4,HTRA3,DKK1	0.000834237	0.00622147
GO_BP	GO:0031032_ACTOMYOSIN_STRUCTURE_ORGANIZATION	11	CSRP2,SORBS1,CSRP1,LMOD1,MYH11,CNN1,CASQ2,PGM5,LDB3,MYH10,ACTC1	5.05039e-06	0.000482986	4	TTN,NEBL,PDGFRA,EPB41L3	0.0202144	0.0435205
GO_BP	GO:0001704_FORMATION_OF_PRIMARY_GERM_LAYER	8	COL4A2,ITGA7,ITGA8,FGFR2,EYA1,INHBA,MMP9,COL11A1	1.55359e-05	0.00111767	3	SFRP2,KLF4,DKK1	0.0153571	0.0357482
GO_BP	GO:0072359_CIRCULATORY_SYSTEM_DEVELOPMENT	34	CSPG4,MCAM,MYLK,MYH11,COL4A2,EMILIN1,HSPB7,JPH2,EMP2,COL4A1,ACTA2,GJC1,EDNRA,ALPK3,SOX6,COL15A1,ANGPT1,ACAN,FGFR2,MYOCD,SEMA6A,HEY2,LDB3,NXN,EYA1,COL8A2,MYH10,CPE,TNMD,PDLIM3,RBM24,ACTC1,GREM1,COL11A1	9.42282e-08	1.68963e-05	21	VEGFD,TTN,SEMA3C,IGF1,CXCL13,SFRP2,CXCL10,ALPK2,SERPINF1,PDPN,HTR2B,TGFBR3,WNT2,FBN1,NEBL,C3,PDGFRA,KLF4,DCN,PTGIS,DKK1	4.23821e-05	0.000860055
GO_BP	GO:0006112_ENERGY_RESERVE_METABOLIC_PROCESS	6	SORBS1,PPP1R3B,GYG2,ENPP1,PPP1R3C,PPP1R1A	6.79772e-05	0.0026716	2	IGF1,GFPT2	0.0286667	0.0560015
GO_BP	GO:0007507_HEART_DEVELOPMENT	21	MYH11,EMILIN1,HSPB7,JPH2,GJC1,EDNRA,ALPK3,SOX6,ACAN,FGFR2,MYOCD,HEY2,LDB3,EYA1,MYH10,CPE,PDLIM3,RBM24,ACTC1,GREM1,COL11A1	1.31336e-06	0.000150721	12	TTN,SEMA3C,IGF1,SFRP2,ALPK2,HTR2B,TGFBR3,WNT2,FBN1,NEBL,PDGFRA,DKK1	0.000523322	0.00480689
GO_BP	GO:0034637_CELLULAR_CARBOHYDRATE_BIOSYNTHETIC_PROCESS	6	SORBS1,PPP1R3B,GYG2,ENPP1,PPP1R3C,PCK1	7.93204e-05	0.00284463	2	IGF1,HAS1	0.0304896	0.0580601
GO_BP	GO:1901700_RESPONSE_TO_OXYGEN_CONTAINING_COMPOUND	41	SORT1,CD9,WFDC1,SORBS1,SLC29A1,KCNMB1,RPE65,LPL,LDOC1,COL4A1,ACVR1C,CA2,ENPP1,PDK3,FLNA,CAV2,SSTR1,PRKAA2,GHR,FGFR2,SDC1,PCK1,GGH,TNC,ANO1,GNAI1,BCHE,GNAL,CDH1,FBXO32,PAWR,INHBA,BAIAP2L1,PRKAR2B,ADGRL3,ADIPOQ,MAOB,CA3,ACTC1,CES1,MMP9	3.58456e-06	0.000354624	24	IGF1,CXCL13,CXCL11,CXCL12,CXCL10,SERPINF1,CXCL9,IDO1,MRC1,CXCL1,PTGES,HTR2B,CD14,TGFBR3,WNT2,FBN1,TRERF1,TFPI,THBD,PDGFRA,CD55,KLF4,DCN,DKK1	0.00135405	0.00749135
GO_BP	GO:0003013_CIRCULATORY_SYSTEM_PROCESS	17	ITPR1,KCNMB1,HSPB7,EMP2,KCNK3,ACTA2,GJC1,EDNRA,KCNH2,FLNA,CASQ2,ANGPT1,HEY2,ADIPOQ,ACTC1,CES1,DES	0.000178383	0.00473872	8	CPA3,TTN,CXCL12,CXCL10,F2RL1,HTR2B,CLIC2,SERPING1	0.0354421	0.0642658
GO_BP	GO:0007369_GASTRULATION	9	COL4A2,ITGA7,ITGA8,FGFR2,EYA1,INHBA,ADIPOQ,MMP9,COL11A1	7.74104e-05	0.00281127	4	SFRP2,UGDH,KLF4,DKK1	0.0150933	0.0351685
GO_BP	GO:0007167_ENZYME_LINKED_RECEPTOR_PROTEIN_SIGNALING_PATHWAY	31	CSPG4,PTPRF,SORT1,SORBS1,GPC1,NTF3,COL4A2,KALRN,RPE65,EMILIN1,COL4A6,COL4A5,COL4A1,TGFB1I1,ACVR1C,ENPP1,CAV2,RBPMS,ANGPT1,ITGA8,GHR,FGFR2,MYOCD,SEMA6A,TNMD,INHBA,BAIAP2L1,ADIPOQ,CYFIP2,GREM1,MMP9	1.16615e-06	0.000139404	19	VEGFD,IGF1,SFRP2,PDGFRL,FSTL1,LRRC32,TGFBR3,LTBP2,PCSK6,GFRA1,FBN1,DAB2,SMURF2,EFEMP1,PDGFRA,DCN,IGFBP6,HTRA3,DKK1	0.00021734	0.0026358
GO_BP	GO:1901701_CELLULAR_RESPONSE_TO_OXYGEN_CONTAINING_COMPOUND	30	SORBS1,SLC29A1,KCNMB1,RPE65,LPL,LDOC1,COL4A1,CA2,ENPP1,PDK3,FLNA,CAV2,SSTR1,PRKAA2,GHR,FGFR2,PCK1,TNC,ANO1,GNAI1,GNAL,CDH1,FBXO32,PAWR,INHBA,BAIAP2L1,PRKAR2B,ADIPOQ,CES1,MMP9	3.65184e-05	0.0018251	17	IGF1,CXCL13,CXCL11,CXCL10,SERPINF1,CXCL9,MRC1,CXCL1,HTR2B,CD14,WNT2,FBN1,TRERF1,TFPI,PDGFRA,CD55,KLF4	0.00555449	0.0178329
GO_BP	GO:0032989_CELLULAR_COMPONENT_MORPHOGENESIS	23	VLDLR,CD9,PLXNA4,CSRP2,CSRP1,GPC1,LMOD1,NTF3,MYH11,KALRN,LHX2,NFASC,CASQ2,SEMA6D,FGFR2,SEMA6A,PGM5,LDB3,MYH10,MATN2,NRK,ACTC1,CYFIP2	3.68965e-05	0.0018251	13	TTN,SEMA3C,CXCL12,CHL1,GAS7,PDPN,GFRA1,PLXNC1,NEBL,LAMA2,PDGFRA,EPB41L3,NTN4	0.0043307	0.0154696
GO_BP	GO:1901863_POSITIVE_REGULATION_OF_MUSCLE_TISSUE_DEVELOPMENT	6	GPC1,FGFR2,MYOCD,HEY2,RBM24,GREM1	1.81777e-05	0.00118527	3	IGF1,TGFBR3,WNT2	0.00210107	0.00991153
GO_BP	GO:0051049_REGULATION_OF_TRANSPORT	38	MYLK,IDH2,ITPR1,SORBS1,STON1,KCNQ4,NTF3,KALRN,KCNMB1,LPL,TUB,SLMAP,FHL1,RIMS3,JPH2,HSPA2,ACVR1C,CA2,EDNRA,ENPP1,KCNH2,FLNA,CASQ2,ANGPT1,SDC1,ANO1,MCTP2,MYH10,CDH1,INHBA,REEP1,SNAP25,ADIPOQ,MAOB,CES1,GREM1,PLPP4,MMP9	0.000237683	0.00577892	21	TTN,IGF1,CXCL11,CXCL12,CXCL10,F2RL1,DPP4,CXCL9,CLIC6,STXBP6,HTR2B,CD14,LRRC32,CLIC2,RAB27B,CRACR2A,PLTP,DAB2,C3,IL15RA,DKK1	0.0265326	0.052821
GO_BP	GO:0048634_REGULATION_OF_MUSCLE_ORGAN_DEVELOPMENT	8	GPC1,JPH2,SOX6,FGFR2,MYOCD,HEY2,RBM24,GREM1	4.53409e-05	0.00216805	4	IGF1,TGFBR3,WNT2,DKK1	0.00478202	0.0162288
GO_BP	GO:0000271_POLYSACCHARIDE_BIOSYNTHETIC_PROCESS	5	SORBS1,PPP1R3B,GYG2,ENPP1,PPP1R3C	0.000347838	0.00712819	2	IGF1,HAS1	0.0235586	0.0484825
GO_BP	GO:0048514_BLOOD_VESSEL_MORPHOGENESIS	19	CSPG4,MCAM,MYLK,COL4A2,EMILIN1,EMP2,COL4A1,GJC1,EDNRA,COL15A1,ANGPT1,FGFR2,MYOCD,SEMA6A,HEY2,EYA1,COL8A2,TNMD,GREM1	5.11438e-05	0.00236664	11	VEGFD,CXCL13,SFRP2,CXCL10,SERPINF1,TGFBR3,C3,PDGFRA,KLF4,DCN,PTGIS	0.00327577	0.0129805
GO_BP	GO:0071495_CELLULAR_RESPONSE_TO_ENDOGENOUS_STIMULUS	35	SORT1,SORBS1,GPC1,NTF3,COL4A2,RPE65,EMILIN1,LPL,LDOC1,COL4A1,TGFB1I1,CA2,ENPP1,FLNA,CAV2,SOX6,CASQ2,ITGA8,SSTR1,PRKAA2,GHR,FGFR2,MYOCD,PCK1,TNC,ANO1,GNAL,CDH1,FBXO32,TNMD,INHBA,BAIAP2L1,PRKAR2B,ADIPOQ,GREM1	6.56821e-06	0.000582646	22	IGF1,CXCL13,SFRP2,SERPINF1,FSTL1,HTR2B,CLEC3B,LRRC32,TGFBR3,LTBP2,PCSK6,WNT2,HAS1,FBN1,DAB2,SMURF2,TRERF1,TFPI,PDGFRA,KLF4,HTRA3,DKK1	0.000418132	0.00404364
GO_BP	GO:0060485_MESENCHYME_DEVELOPMENT	12	DACT3,ACTG2,ACTA2,TGFB1I1,EDNRA,SEMA6D,FGFR2,SEMA6A,HEY2,RBM24,ACTC1,GREM1	3.30838e-05	0.0018251	7	SEMA3C,SFRP2,PDPN,HTR2B,TGFBR3,WNT2,DAB2	0.00162499	0.00866782
GO_BP	GO:0007267_CELL_CELL_SIGNALING	38	DAAM2,DACT3,ITPR1,DIXDC1,NTF3,KALRN,SLC29A1,KCNMB1,LPL,IL17B,RIMS3,KCNK3,TGFB1I1,GJC1,ACVR1C,CA2,FLNA,CASQ2,DTNA,PRKAA2,GPC4,FGFR2,SDC1,TNC,ANO1,NXN,GNAI1,MCTP2,PLCB4,CPE,BCHE,CDH1,INHBA,SNAP25,PRKAR2B,ADIPOQ,MAOB,GREM1	0.000175356	0.00473872	23	CXCL13,SFRP2,CXCL11,CXCL12,CXCL10,F2RL1,ALPK2,DPP4,CXCL9,TNFAIP6,HTR2B,CD14,LRRC32,CCN5,WNT2,DAB2,SMURF2,CPZ,C3,LAMA2,KLF4,IGFBP6,DKK1	0.00644877	0.0196184
GO_BP	GO:0071526_SEMAPHORIN_PLEXIN_SIGNALING_PATHWAY	4	PLXNA4,FLNA,SEMA6D,SEMA6A	0.000125459	0.00378886	2	SEMA3C,PLXNC1	0.00408353	0.014764
GO_BP	GO:0014902_MYOTUBE_DIFFERENTIATION	6	SORT1,CD9,TANC1,CAV2,MYOCD,RBM24	0.000359692	0.00730853	3	IGF1,CXCL10,CXCL9	0.0110488	0.0278067
GO_BP	GO:0035239_TUBE_MORPHOGENESIS	22	CSPG4,MCAM,MYLK,COL4A2,EMILIN1,SHROOM3,EMP2,COL4A1,GJC1,EDNRA,LHX2,COL15A1,ANGPT1,FGFR2,MYOCD,SEMA6A,HEY2,TNC,EYA1,COL8A2,TNMD,GREM1	0.000275001	0.00605099	13	VEGFD,CXCL13,SFRP2,CXCL10,SERPINF1,PDPN,TGFBR3,WNT2,C3,PDGFRA,KLF4,DCN,PTGIS	0.00775286	0.0222217
GO_BP	GO:0048738_CARDIAC_MUSCLE_TISSUE_DEVELOPMENT	12	MYH11,JPH2,GJC1,ALPK3,SOX6,FGFR2,MYOCD,HEY2,MYH10,ACTC1,GREM1,COL11A1	1.4598e-06	0.000161084	8	TTN,IGF1,ALPK2,TGFBR3,WNT2,NEBL,PDGFRA,DKK1	4.05632e-05	0.000857026
GO_BP	GO:0007423_SENSORY_ORGAN_DEVELOPMENT	16	SMOC1,KCNQ4,LRIG1,RPE65,TUB,KCNK3,COL4A1,LHX2,ITGA8,FGFR2,HEY2,EYA1,COL8A2,MYH10,INHBA,COL11A1	0.000597231	0.00951105	9	MFAP5,SERPINF1,C1QB,WNT2,FBN1,EFEMP1,PDGFRA,KLF4,ALDH1A3	0.0155032	0.0360528
GO_BP	GO:0034762_REGULATION_OF_TRANSMEMBRANE_TRANSPORT	15	SORBS1,KCNQ4,KCNMB1,SLMAP,FHL1,JPH2,HSPA2,CA2,EDNRA,ENPP1,KCNH2,FLNA,CASQ2,ADIPOQ,MMP9	0.00131861	0.0137216	8	IGF1,CXCL11,CXCL10,CXCL9,CLIC6,CLIC2,CRACR2A,C3	0.0340808	0.0623199
GO_BP	GO:0014070_RESPONSE_TO_ORGANIC_CYCLIC_COMPOUND	21	WFDC1,KCNMB1,CA2,FLNA,CAV2,CASQ2,SSTR1,SDC1,PCK1,TNC,GNAI1,BCHE,GNAL,CDH1,FBXO32,INHBA,PRKAR2B,ADGRL3,ADIPOQ,MAOB,CES1	0.00217544	0.0156417	12	LUM,CXCL10,SERPINF1,PTGES,HTR2B,KYNU,P2RY13,DAB2,TRERF1,TFPI,THBD,KLF4	0.0341982	0.0624386
GO_BP	GO:0070527_PLATELET_AGGREGATION	4	CD9,MYL9,CSRP1,FLNA	0.000919976	0.0122195	2	PDPN,PDGFRA	0.0131574	0.0316816
GO_BP	GO:0032787_MONOCARBOXYLIC_ACID_METABOLIC_PROCESS	16	CSPG4,ACOT1,IDH2,SLC6A8,FAH,LPL,CKB,HACD1,PDK3,CKMT2,PRKAA2,PCK1,ENO2,PRKAR2B,ADIPOQ,CES1	0.00242593	0.0168932	9	IGF1,IDO1,PTGES,KYNU,C3,DCN,HSD3B7,PTGIS,ALDH1A3	0.0341198	0.0623434
GO_BP	GO:0070482_RESPONSE_TO_OXYGEN_LEVELS	11	ITPR1,EGLN3,SLC29A1,KCNMB1,KCNK3,EDNRA,PDK3,AK4,MYOCD,PCK1,ADIPOQ	0.00285537	0.0183827	6	VEGFD,CXCL12,DPP4,PDPN,TGFBR3,PTGIS	0.0354846	0.0642939
GO_BP	GO:0006026_AMINOGLYCAN_CATABOLIC_PROCESS	5	CSPG4,GPC1,ACAN,GPC4,SDC1	0.000174062	0.00473872	3	LUM,LYVE1,DCN	0.00210107	0.00991153
GO_BP	GO:0008360_REGULATION_OF_CELL_SHAPE	6	PLXNA4,FBLIM1,SHROOM3,ITGA7,CDC42EP3,MYH10	0.00301455	0.0183827	3	PDPN,PLXNC1,EPB41L3	0.0362083	0.0651544
GO_BP	GO:0019336_PHENOL_CONTAINING_COMPOUND_CATABOLIC_PROCESS	3	FAH,MAOA,MAOB	6.90484e-06	0.000582646	2	DIO2,MOXD1	8.09207e-05	0.00126651
GO_BP	GO:0010827_REGULATION_OF_GLUCOSE_TRANSMEMBRANE_TRANSPORT	4	SORBS1,EDNRA,ENPP1,ADIPOQ	0.00193983	0.0156417	2	IGF1,C3	0.0204544	0.0439179
GO_BP	GO:1901616_ORGANIC_HYDROXY_COMPOUND_CATABOLIC_PROCESS	4	ALDH1B1,FAH,MAOA,MAOB	0.00218955	0.0156417	2	DIO2,MOXD1	0.0219763	0.0461852
GO_BP	GO:0009790_EMBRYO_DEVELOPMENT	25	KCNQ4,LRIG1,COL4A2,SHROOM3,TGFB1I1,ACVR1C,ITGA7,EDNRA,LHX2,SOX6,ANGPT1,ITGA8,FGFR2,HEY2,NXN,EYA1,MYH10,HOXC10,INHBA,NRK,ADIPOQ,GREM1,PLPP4,MMP9,COL11A1	0.000459317	0.00816604	16	SEMA3C,IGF1,SFRP2,MFAP5,HTR2B,FRAS1,PCSK6,WNT2,FBN1,LAMA2,EFEMP1,PDGFRA,UGDH,KLF4,ALDH1A3,DKK1	0.00423606	0.0151771
GO_BP	GO:0019915_LIPID_STORAGE	4	LPL,ACVR1C,ENPP1,CES1	0.00275808	0.0183827	2	C3,CDS1	0.0252011	0.0508511
GO_BP	GO:0001944_VASCULATURE_DEVELOPMENT	21	CSPG4,MCAM,MYLK,COL4A2,EMILIN1,EMP2,COL4A1,ACTA2,GJC1,EDNRA,COL15A1,ANGPT1,FGFR2,MYOCD,SEMA6A,HEY2,EYA1,COL8A2,MYH10,TNMD,GREM1	7.29003e-05	0.00276053	14	VEGFD,SEMA3C,CXCL13,SFRP2,CXCL10,SERPINF1,PDPN,TGFBR3,WNT2,C3,PDGFRA,KLF4,DCN,PTGIS	0.000649544	0.00523898
GO_BP	GO:0048644_MUSCLE_ORGAN_MORPHOGENESIS	5	MYLK,FGFR2,HEY2,ACTC1,COL11A1	0.00045901	0.00816604	3	TTN,TGFBR3,WNT2	0.00399971	0.0147126
GO_BP	GO:0090130_TISSUE_MIGRATION	9	ACTG2,EPPK1,EMP2,ACTA2,ANGPT1,S100A2,ACTC1,GREM1,MMP9	0.00387684	0.0209965	5	CXCL13,DPP4,SERPINF1,KLF4,DCN	0.0335274	0.0621113
GO_BP	GO:0055024_REGULATION_OF_CARDIAC_MUSCLE_TISSUE_DEVELOPMENT	6	JPH2,SOX6,FGFR2,MYOCD,HEY2,GREM1	5.7995e-05	0.00251389	4	IGF1,TGFBR3,WNT2,DKK1	0.00047189	0.00440489
GO_BP	GO:0034109_HOMOTYPIC_CELL_CELL_ADHESION	4	CD9,MYL9,CSRP1,FLNA	0.00399895	0.0209965	2	PDPN,PDGFRA	0.0314234	0.0594247
GO_BP	GO:0033002_MUSCLE_CELL_PROLIFERATION	7	CNN1,ANGPT1,FGFR2,MYOCD,HEY2,ADIPOQ,MMP9	0.00284015	0.0183827	4	IGF1,TGFBR3,WNT2,KLF4	0.0206187	0.044151
GO_BP	GO:0045595_REGULATION_OF_CELL_DIFFERENTIATION	36	PTPRF,SMOC1,VLDLR,SORT1,DAAM2,PLXNA4,DACT3,IDH2,DIXDC1,MYL9,GPC1,NTF3,KALRN,LPL,EMP2,TGFB1I1,CA2,ENPP1,LHX2,FLNA,SOX6,SEMA6D,FGFR2,MYOCD,SEMA6A,PCK1,HEY2,EYA1,ADIRF,INHBA,PCP4,SNAP25,RBM24,ADIPOQ,GREM1,MMP9	0.00149475	0.0137931	23	SEMA3C,IGF1,SFRP2,CXCL12,CXCL10,SERPINF1,CXCL9,PDPN,CR1,WNT2,PLXNC1,FBN1,DAB2,METRNL,EFEMP1,PDGFRA,IL2RA,KLF4,MEDAG,PLA2G2A,TWIST2,DKK1,CDS1	0.0104314	0.0268048
GO_BP	GO:0051093_NEGATIVE_REGULATION_OF_DEVELOPMENTAL_PROCESS	21	SORT1,DAAM2,DACT3,IDH2,DIXDC1,COL4A2,EMILIN1,TGFB1I1,ACVR1C,ENPP1,LHX2,SOX6,SEMA6D,MYOCD,SEMA6A,HEY2,TNMD,INHBA,ADIPOQ,GREM1,MMP9	0.00317465	0.0188964	13	SEMA3C,IGF1,SFRP2,CTSC,CXCL10,ALPK2,SERPINF1,FBN1,EFEMP1,KLF4,DCN,TWIST2,DKK1	0.0206645	0.0442093
GO_BP	GO:1901655_CELLULAR_RESPONSE_TO_KETONE	5	PRKAA2,PCK1,TNC,GNAI1,FBXO32	0.00113964	0.0137216	3	SERPINF1,TRERF1,KLF4	0.00733846	0.0213165
GO_BP	GO:0060191_REGULATION_OF_LIPASE_ACTIVITY	5	SORT1,NTF3,LPL,EDNRA,FGFR2	0.00126971	0.0137216	3	HTR2B,PCSK6,PDGFRA	0.00788902	0.0225848
GO_BP	GO:0048878_CHEMICAL_HOMEOSTASIS	24	ITPR1,SLC29A1,LPL,SLMAP,FHL1,CKB,JPH2,KCNK3,CA2,EDNRA,ENPP1,PDK3,KCNH2,CAV2,HEPH,CASQ2,PRKAA2,SLC24A3,PCK1,ANO1,PRKAR2B,ADIPOQ,CA12,CES1	0.00436712	0.0224926	15	STEAP4,CXCL13,CXCL11,CXCL12,CXCL10,F2RL1,SERPINF1,CXCL9,SCARA5,HTR2B,CLIC2,PDGFRA,CD55,DCN,FAM20A	0.0241591	0.0491414
GO_BP	GO:0030182_NEURON_DIFFERENTIATION	26	PTPRF,VLDLR,PLXNA4,DIXDC1,GPC1,NTF3,KALRN,RPE65,TSPAN2,LHX2,NFASC,SEMA6D,FGFR2,SEMA6A,HEY2,TNC,EYA1,MYH10,CDH1,HOXC10,INHBA,PCP4,SNAP25,MATN2,NRK,CYFIP2	0.00968154	0.0342073	16	VEGFD,SEMA3C,SFRP2,CXCL12,CHL1,SERPINF1,GAS7,GFRA1,WNT2,PLXNC1,C3,LAMA2,KLF4,EPB41L3,NTN4,DKK1	0.0478668	0.0801937
GO_BP	GO:0061564_AXON_DEVELOPMENT	13	PTPRF,VLDLR,PLXNA4,GPC1,TSPAN2,LHX2,NFASC,SEMA6D,FGFR2,SEMA6A,TNC,MYH10,MATN2	0.00499497	0.0241038	8	SEMA3C,CXCL12,CHL1,GFRA1,PLXNC1,LAMA2,KLF4,NTN4	0.0244752	0.0495123
GO_BP	GO:0010959_REGULATION_OF_METAL_ION_TRANSPORT	10	MYLK,KCNMB1,SLMAP,FHL1,JPH2,HSPA2,KCNH2,FLNA,CASQ2,PLPP4	0.00724265	0.0296759	6	CXCL11,CXCL12,CXCL10,CXCL9,CLIC2,CRACR2A	0.0334059	0.0619428
GO_BP	GO:0042060_WOUND_HEALING	15	MCAM,MYLK,CD9,WFDC1,ITPR1,AKAP1,MYL9,CSRP1,EPPK1,FLNA,FGFR2,SDC1,TNC,MYH10,PRKAR2B	0.000689154	0.0104524	10	IGF1,F2RL1,PDPN,F13A1,DOCK8,SERPING1,TFPI,THBD,PDGFRA,DCN	0.00314247	0.0127142
GO_BP	GO:0048729_TISSUE_MORPHOGENESIS	20	MYLK,ACTG2,SHROOM3,COL4A1,ACTA2,TGFB1I1,CA2,EDNRA,LHX2,FLNA,ITGA8,GPC4,FGFR2,HEY2,TNC,EYA1,INHBA,ACTC1,GREM1,COL11A1	4.99397e-05	0.0023488	14	TTN,SEMA3C,SFRP2,CXCL10,PDPN,TGFBR3,FRAS1,WNT2,DAB2,SMURF2,KLF4,NTN4,ALDH1A3,DKK1	0.000226731	0.00272421
GO_BP	GO:0035295_TUBE_DEVELOPMENT	23	CSPG4,MCAM,MYLK,COL4A2,EMILIN1,SHROOM3,EMP2,COL4A1,GJC1,EDNRA,LHX2,COL15A1,ANGPT1,FGFR2,MYOCD,SDC1,SEMA6A,HEY2,TNC,EYA1,COL8A2,TNMD,GREM1	0.00205224	0.0156417	15	VEGFD,SEMA3C,CXCL13,SFRP2,CXCL10,SERPINF1,PDPN,ADAMTS2,TGFBR3,WNT2,C3,PDGFRA,KLF4,DCN,PTGIS	0.00902849	0.0243087
GO_BP	GO:0007498_MESODERM_DEVELOPMENT	5	LHX2,ITGA8,FGFR2,EYA1,INHBA	0.00371815	0.0209965	3	SFRP2,KLF4,DKK1	0.0162391	0.0369692
GO_BP	GO:0003231_CARDIAC_VENTRICLE_DEVELOPMENT	5	FGFR2,MYOCD,HEY2,CPE,COL11A1	0.00528738	0.0245997	3	SEMA3C,SFRP2,TGFBR3	0.0205984	0.0441474
GO_BP	GO:1903846_POSITIVE_REGULATION_OF_CELLULAR_RESPONSE_TO_TRANSFORMING_GROWTH_FACTOR_BETA_STIMULUS	3	TGFB1I1,ITGA8,MYOCD	0.000417557	0.00798647	2	TGFBR3,DAB2	0.00161114	0.00861328
GO_BP	GO:0050680_NEGATIVE_REGULATION_OF_EPITHELIAL_CELL_PROLIFERATION	5	WFDC1,EPPK1,CAV2,FGFR2,TNMD	0.00548764	0.0253119	3	SFRP2,SERPINF1,TGFBR3	0.0211229	0.0450707
GO_BP	GO:0055007_CARDIAC_MUSCLE_CELL_DIFFERENTIATION	8	MYH11,ALPK3,SOX6,MYOCD,HEY2,MYH10,ACTC1,GREM1	5.5403e-06	0.000512746	6	TTN,IGF1,ALPK2,NEBL,PDGFRA,DKK1	2.132e-05	0.000507203
GO_BP	GO:0042476_ODONTOGENESIS	5	CA2,FGFR2,SDC1,TNC,INHBA	0.00569339	0.0261349	3	ADAMTS5,PDGFRA,FAM20A	0.0216556	0.0457537
GO_BP	GO:0090596_SENSORY_ORGAN_MORPHOGENESIS	8	KCNQ4,LRIG1,RPE65,ITGA8,FGFR2,EYA1,COL8A2,COL11A1	0.0053061	0.0245997	5	MFAP5,WNT2,FBN1,EFEMP1,ALDH1A3	0.0196572	0.0428332
GO_BP	GO:0007272_ENSHEATHMENT_OF_NEURONS	5	CD9,GPC1,TSPAN2,NFASC,ADAM22	0.00657307	0.0277734	3	CTSC,EPB41L3,CLDN11	0.0238682	0.0490774
GO_BP	GO:0045598_REGULATION_OF_FAT_CELL_DIFFERENTIATION	6	SORT1,LPL,TGFB1I1,ENPP1,ADIRF,ADIPOQ	0.00114877	0.0137216	4	SFRP2,METRNL,MEDAG,CDS1	0.00407627	0.014764
GO_BP	GO:2000725_REGULATION_OF_CARDIAC_MUSCLE_CELL_DIFFERENTIATION	3	SOX6,MYOCD,GREM1	0.000776995	0.0113735	2	IGF1,DKK1	0.00256198	0.0111019
GO_BP	GO:0016331_MORPHOGENESIS_OF_EMBRYONIC_EPITHELIUM	5	SHROOM3,TGFB1I1,LHX2,FGFR2,GREM1	0.010434	0.0361309	3	SFRP2,WNT2,ALDH1A3	0.0326642	0.0607569
GO_BP	GO:1902284_NEURON_PROJECTION_EXTENSION_INVOLVED_IN_NEURON_PROJECTION_GUIDANCE	3	PLXNA4,SEMA6D,SEMA6A	0.000968111	0.0126251	2	SEMA3C,CXCL12	0.00302118	0.0122652
GO_BP	GO:0006082_ORGANIC_ACID_METABOLIC_PROCESS	22	CSPG4,ACOT1,IDH2,SLC6A8,FAH,LPL,CKB,ITIH5,HACD1,ENPP1,PDK3,CKMT2,ANGPT1,ACAN,PRKAA2,GHR,PCK1,GGH,ENO2,PRKAR2B,ADIPOQ,CES1	0.0131609	0.0411764	14	IGF1,LUM,LYVE1,IDO1,PTGES,KYNU,HAS1,C3,UGDH,DCN,HSD3B7,PTGIS,GFPT2,ALDH1A3	0.0410227	0.0714966
GO_BP	GO:0048333_MESODERMAL_CELL_DIFFERENTIATION	4	ITGA8,FGFR2,EYA1,INHBA	3.54512e-05	0.0018251	3	SFRP2,KLF4,DKK1	0.000107965	0.00157576
GO_BP	GO:0001890_PLACENTA_DEVELOPMENT	5	ADAM19,LDOC1,FGFR2,HEY2,NRK	0.0114344	0.0377942	3	WNT2,DCN,PTGIS	0.034765	0.0632793
GO_BP	GO:0110148_BIOMINERALIZATION	5	ENPP1,SLC24A3,FGFR2,HEY2,GREM1	0.0128714	0.0404469	3	IGF1,CLEC3B,FAM20A	0.0376858	0.0667569
GO_BP	GO:0030168_PLATELET_ACTIVATION	5	CD9,ITPR1,MYL9,CSRP1,FLNA	0.0128714	0.0404469	3	PDPN,THBD,PDGFRA	0.0376858	0.0667569
GO_BP	GO:0051147_REGULATION_OF_MUSCLE_CELL_DIFFERENTIATION	6	SOX6,FGFR2,MYOCD,HEY2,RBM24,GREM1	0.00260284	0.0178649	4	IGF1,CXCL10,CXCL9,DKK1	0.00741572	0.0214362
GO_BP	GO:1902667_REGULATION_OF_AXON_GUIDANCE	3	PLXNA4,SEMA6D,SEMA6A	0.00189646	0.0156417	2	SEMA3C,CXCL12	0.00501175	0.0167629
GO_BP	GO:0050919_NEGATIVE_CHEMOTAXIS	3	PLXNA4,SEMA6D,SEMA6A	0.00263796	0.0179344	2	SEMA3C,DPP4	0.00643255	0.0195942
GO_BP	GO:0003205_CARDIAC_CHAMBER_DEVELOPMENT	6	FGFR2,MYOCD,HEY2,MYH10,CPE,COL11A1	0.0055138	0.0253918	4	SEMA3C,SFRP2,TGFBR3,WNT2	0.0128948	0.0311439
GO_BP	GO:0048260_POSITIVE_REGULATION_OF_RECEPTOR_MEDIATED_ENDOCYTOSIS	3	NTF3,ANGPT1,GREM1	0.00330973	0.0195786	2	DAB2,C3	0.00764017	0.0219516
GO_BP	GO:0007566_EMBRYO_IMPLANTATION	3	EMP2,ACVR1C,MMP9	0.00381707	0.0209965	2	SMURF2,PTGIS	0.00851461	0.0235812
GO_BP	GO:0055025_POSITIVE_REGULATION_OF_CARDIAC_MUSCLE_TISSUE_DEVELOPMENT	4	FGFR2,MYOCD,HEY2,GREM1	0.000178111	0.00473872	3	IGF1,TGFBR3,WNT2	0.000392832	0.00383012
GO_BP	GO:0009611_RESPONSE_TO_WOUNDING	17	PTPRF,MCAM,MYLK,CD9,WFDC1,ITPR1,AKAP1,MYL9,CSRP1,EPPK1,FLNA,FGFR2,SDC1,TNC,MYH10,PRKAR2B,MATN2	0.000866687	0.0122195	12	IGF1,F2RL1,LYVE1,PDPN,F13A1,DOCK8,SERPING1,TFPI,THBD,PDGFRA,KLF4,DCN	0.00184743	0.00904326
GO_BP	GO:0051148_NEGATIVE_REGULATION_OF_MUSCLE_CELL_DIFFERENTIATION	3	SOX6,MYOCD,HEY2	0.00467296	0.0237893	2	CXCL10,DKK1	0.00993229	0.0260376
GO_BP	GO:0048008_PLATELET_DERIVED_GROWTH_FACTOR_RECEPTOR_SIGNALING_PATHWAY	3	CSPG4,MYOCD,ADIPOQ	0.00498466	0.0241038	2	PDGFRL,PDGFRA	0.0104335	0.0268048
GO_BP	GO:0051155_POSITIVE_REGULATION_OF_STRIATED_MUSCLE_CELL_DIFFERENTIATION	3	MYOCD,RBM24,GREM1	0.00498466	0.0241038	2	IGF1,CXCL9	0.0104335	0.0268048
GO_BP	GO:1905207_REGULATION_OF_CARDIOCYTE_DIFFERENTIATION	4	SOX6,MYOCD,HEY2,GREM1	0.000272712	0.00605099	3	SEMA3C,IGF1,DKK1	0.000553759	0.00497129
GO_BP	GO:0001763_MORPHOGENESIS_OF_A_BRANCHING_STRUCTURE	6	COL4A1,EDNRA,FGFR2,TNC,EYA1,GREM1	0.0112199	0.0373434	4	SEMA3C,SFRP2,WNT2,NTN4	0.021863	0.04611
GO_BP	GO:1901654_RESPONSE_TO_KETONE	6	PRKAA2,PCK1,TNC,GNAI1,FBXO32,MAOB	0.0112199	0.0373434	4	SERPINF1,TGFBR3,TRERF1,KLF4	0.021863	0.04611
GO_BP	GO:0010518_POSITIVE_REGULATION_OF_PHOSPHOLIPASE_ACTIVITY	3	NTF3,EDNRA,FGFR2	0.00715042	0.0296759	2	HTR2B,PDGFRA	0.0137462	0.0326695
GO_BP	GO:0051046_REGULATION_OF_SECRETION	15	IDH2,ITPR1,KALRN,LPL,RIMS3,ACVR1C,SDC1,ANO1,MCTP2,MYH10,INHBA,SNAP25,ADIPOQ,MAOB,CES1	0.0154936	0.0457318	10	TTN,IGF1,CXCL12,F2RL1,DPP4,STXBP6,HTR2B,CD14,LRRC32,RAB27B	0.02976	0.0572807
GO_BP	GO:0014855_STRIATED_MUSCLE_CELL_PROLIFERATION	3	ANGPT1,FGFR2,HEY2	0.009369	0.0333081	2	TGFBR3,WNT2	0.0169131	0.0382065
GO_BP	GO:0044706_MULTI_MULTICELLULAR_ORGANISM_PROCESS	6	KALRN,LDOC1,EMP2,ACVR1C,NRK,MMP9	0.01861	0.0505606	4	IDO1,SMURF2,THBD,PTGIS	0.0319466	0.0602609
GO_BP	GO:0010517_REGULATION_OF_PHOSPHOLIPASE_ACTIVITY	3	NTF3,EDNRA,FGFR2	0.0119933	0.0394596	2	HTR2B,PDGFRA	0.0204544	0.0439179
GO_BP	GO:0001503_OSSIFICATION	9	SMOC1,SORT1,ENPP1,SLC24A3,FGFR2,TNC,CHRDL2,GREM1,COL11A1	0.0245509	0.0603762	6	IGF1,SFRP2,CLEC3B,RRAS2,TWIST2,DKK1	0.0408196	0.0711949
GO_BP	GO:0060193_POSITIVE_REGULATION_OF_LIPASE_ACTIVITY	3	NTF3,EDNRA,FGFR2	0.0137728	0.0429502	2	HTR2B,PDGFRA	0.0227599	0.0469608
GO_BP	GO:0043086_NEGATIVE_REGULATION_OF_CATALYTIC_ACTIVITY	15	SORT1,PPP1R14A,WFDC1,AOC3,SPOCD1,RGS3,ITIH5,PI15,PDK3,PPP1R12B,MYOCD,PPP1R1A,PRKAR2B,ADIPOQ,MMP9	0.0288329	0.066973	10	SFRP2,SERPINF1,LXN,CR1,P2RY13,RARRES1,SERPING1,TFPI,C3,KLF4	0.0471155	0.0792519
GO_BP	GO:0055008_CARDIAC_MUSCLE_TISSUE_MORPHOGENESIS	4	FGFR2,HEY2,ACTC1,COL11A1	0.000990777	0.0127468	3	TTN,TGFBR3,WNT2	0.00157742	0.00850946
GO_BP	GO:0060389_PATHWAY_RESTRICTED_SMAD_PROTEIN_PHOSPHORYLATION	4	EMILIN1,RBPMS,INHBA,GREM1	0.000990777	0.0127468	3	TGFBR3,DAB2,DKK1	0.00157742	0.00850946
GO_BP	GO:0051149_POSITIVE_REGULATION_OF_MUSCLE_CELL_DIFFERENTIATION	3	MYOCD,RBM24,GREM1	0.0216917	0.0559654	2	IGF1,CXCL9	0.0323722	0.0602609
GO_BP	GO:1901019_REGULATION_OF_CALCIUM_ION_TRANSMEMBRANE_TRANSPORTER_ACTIVITY	3	JPH2,HSPA2,CASQ2	0.0216917	0.0559654	2	CLIC2,CRACR2A	0.0323722	0.0602609
GO_BP	GO:0097006_REGULATION_OF_PLASMA_LIPOPROTEIN_PARTICLE_LEVELS	3	VLDLR,LPL,ADIPOQ	0.0225242	0.0567856	2	PLTP,PLA2G2A	0.0333358	0.061861
GO_BP	GO:0055114_OXIDATION_REDUCTION_PROCESS	19	IDH2,SORBS1,AOC3,EGLN3,ALDH1B1,RPE65,PPP1R3B,HSD17B6,MSRB3,GYG2,ENPP1,HEPH,MAOA,PPP1R3C,NXN,ENO2,PPP1R1A,ADIPOQ,MAOB	0.0172776	0.0485976	13	STEAP4,IGF1,DIO2,IDO1,PTGES,AOX1,MOXD1,UGDH,HSD3B7,PTGIS,GFPT2,ALDH1A3,CYB561	0.0255475	0.0514192
GO_BP	GO:0048332_MESODERM_MORPHOGENESIS	4	ITGA8,FGFR2,EYA1,INHBA	0.00150371	0.0137931	3	SFRP2,KLF4,DKK1	0.00221857	0.00991153
GO_BP	GO:0014033_NEURAL_CREST_CELL_DIFFERENTIATION	3	EDNRA,SEMA6D,SEMA6A	0.023376	0.0585728	2	SEMA3C,HTR2B	0.0343143	0.0625066
GO_BP	GO:1905954_POSITIVE_REGULATION_OF_LIPID_LOCALIZATION	3	LPL,ADIPOQ,CES1	0.0279267	0.065299	2	PLTP,C3	0.0394278	0.0689697
GO_BP	GO:0003208_CARDIAC_VENTRICLE_MORPHOGENESIS	4	FGFR2,HEY2,CPE,COL11A1	0.00206193	0.0156417	3	SEMA3C,SFRP2,TGFBR3	0.00287456	0.0117703
GO_BP	GO:0023057_NEGATIVE_REGULATION_OF_SIGNALING	26	DACT3,ITPR1,GPC1,KALRN,EMILIN1,RGS3,TGFB1I1,ACVR1C,ENPP1,CAV2,CASQ2,PRKAA2,MYOCD,SEMA6A,HEY2,NXN,GNAI1,EYA1,BCHE,TNMD,PAWR,INHBA,ADIPOQ,MAOB,GREM1,MMP9	0.0099492	0.0348101	18	IGF1,SFRP2,CXCL12,F2RL1,ALPK2,HTR2B,CD14,LRRC32,TGFBR3,CLIC2,FBN1,DAB2,SMURF2,KLF4,DCN,IGFBP6,HTRA3,DKK1	0.0138128	0.0327951
GO_BP	GO:0034764_POSITIVE_REGULATION_OF_TRANSMEMBRANE_TRANSPORT	8	SORBS1,KCNMB1,JPH2,HSPA2,CA2,KCNH2,FLNA,ADIPOQ	0.00098599	0.0127468	6	IGF1,CXCL11,CXCL10,CXCL9,CRACR2A,C3	0.0013526	0.00749135
GO_BP	GO:0051050_POSITIVE_REGULATION_OF_TRANSPORT	21	MYLK,SORBS1,NTF3,KCNMB1,LPL,TUB,FHL1,JPH2,HSPA2,CA2,KCNH2,FLNA,ANGPT1,SDC1,ANO1,MYH10,CDH1,INHBA,ADIPOQ,CES1,GREM1	0.0022645	0.0161212	15	TTN,IGF1,CXCL11,CXCL12,CXCL10,F2RL1,CXCL9,HTR2B,CD14,RAB27B,CRACR2A,PLTP,DAB2,C3,IL15RA	0.00308761	0.0125135
GO_BP	GO:0050848_REGULATION_OF_CALCIUM_MEDIATED_SIGNALING	3	ITPR1,JPH2,CASQ2	0.0329701	0.0723174	2	IGF1,CLIC2	0.0449058	0.0766253
GO_BP	GO:0001708_CELL_FATE_SPECIFICATION	3	SOX6,EYA1,HOXC10	0.0340385	0.0743765	2	SFRP2,DKK1	0.0460445	0.0781312
GO_BP	GO:0002792_NEGATIVE_REGULATION_OF_PEPTIDE_SECRETION	3	IDH2,KALRN,ACVR1C	0.0340385	0.0743765	2	F2RL1,LRRC32	0.0460445	0.0781312
GO_BP	GO:0032963_COLLAGEN_METABOLIC_PROCESS	3	EMILIN1,COL15A1,MMP9	0.0373636	0.0788689	2	ADAMTS2,TNXB	0.049546	0.0821966
GO_BP	GO:0045445_MYOBLAST_DIFFERENTIATION	4	MYOCD,SDC1,RBM24,GREM1	0.00420409	0.0218506	3	IGF1,CXCL10,CXCL9	0.00517469	0.0172417
GO_BP	GO:0001656_METANEPHROS_DEVELOPMENT	4	ITGA8,EYA1,ADIPOQ,GREM1	0.00534374	0.0246879	3	FRAS1,FBN1,PDGFRA	0.00631474	0.0193914
GO_BP	GO:0008285_NEGATIVE_REGULATION_OF_CELL_POPULATION_PROLIFERATION	20	CD9,SPEG,IDH2,WFDC1,EPPK1,LDOC1,TGFB1I1,ACVR1C,CNN1,CAV2,SSTR1,FGFR2,MYOCD,BCHE,TNMD,PAWR,INHBA,NRK,ADIPOQ,GREM1	0.000103341	0.00322268	15	DPT,SFRP2,SERPINF1,PDPN,IDO1,CXCL1,PTGES,VSIG4,LRRC32,TGFBR3,RARRES1,IL20RB,IL2RA,KLF4,IGFBP6	0.000119676	0.00170484
GO_BP	GO:0043270_POSITIVE_REGULATION_OF_ION_TRANSPORT	7	MYLK,KCNMB1,FHL1,JPH2,HSPA2,KCNH2,FLNA	0.022168	0.0567856	5	CXCL11,CXCL12,CXCL10,CXCL9,CRACR2A	0.0253889	0.0511867
GO_BP	GO:0051336_REGULATION_OF_HYDROLASE_ACTIVITY	24	SORT1,PPP1R14A,PLXNA4,WFDC1,TPM2,EGLN3,NTF3,KALRN,PPP1R3B,LPL,SPOCD1,HSPA2,RGS3,CHML,ITIH5,ACVR1C,EDNRA,PI15,CAV2,FGFR2,ARHGEF26,PPP1R1A,CYFIP2,MMP9	0.00935795	0.0333081	17	CXCL13,SFRP2,F2RL1,SERPINF1,LXN,HTR2B,CR1,PCSK6,DOCK8,PLXNC1,RARRES1,SERPING1,ARAP2,TFPI,C3,PDGFRA,KLF4	0.0101793	0.0263798
GO_BP	GO:0044092_NEGATIVE_REGULATION_OF_MOLECULAR_FUNCTION	20	PTPRF,SORT1,PPP1R14A,WFDC1,AOC3,SPOCD1,RGS3,ITIH5,PI15,PDK3,LHX2,FLNA,CASQ2,PPP1R12B,MYOCD,HEY2,PPP1R1A,PRKAR2B,ADIPOQ,MMP9	0.0282841	0.0660269	14	SFRP2,SERPINF1,LXN,CR1,CLIC2,P2RY13,RARRES1,SERPING1,DAB2,TFPI,C3,KLF4,PTGIS,DKK1	0.0301316	0.0579023
GO_BP	GO:0048666_NEURON_DEVELOPMENT	20	PTPRF,VLDLR,PLXNA4,GPC1,NTF3,KALRN,RPE65,TSPAN2,LHX2,NFASC,SEMA6D,FGFR2,SEMA6A,TNC,MYH10,CDH1,SNAP25,MATN2,NRK,CYFIP2	0.0343255	0.0749466	14	SEMA3C,SFRP2,CXCL12,CHL1,SERPINF1,GAS7,GFRA1,PLXNC1,C3,LAMA2,KLF4,EPB41L3,NTN4,DKK1	0.0352702	0.0640707
GO_BP	GO:0032990_CELL_PART_MORPHOGENESIS	14	VLDLR,PLXNA4,GPC1,NTF3,KALRN,LHX2,NFASC,SEMA6D,FGFR2,SEMA6A,MYH10,MATN2,NRK,CYFIP2	0.0241281	0.0598301	10	SEMA3C,CXCL12,CHL1,GAS7,PDPN,GFRA1,PLXNC1,LAMA2,EPB41L3,NTN4	0.024179	0.0491414
GO_BP	GO:0003158_ENDOTHELIUM_DEVELOPMENT	4	COL15A1,HEY2,ARHGEF26,TNMD	0.0170209	0.0479696	3	CXCL10,F2RL1,PDPN	0.0166918	0.0379271
GO_BP	GO:0048598_EMBRYONIC_MORPHOGENESIS	16	KCNQ4,LRIG1,COL4A2,SHROOM3,TGFB1I1,ITGA7,LHX2,ITGA8,FGFR2,EYA1,HOXC10,INHBA,ADIPOQ,GREM1,MMP9,COL11A1	0.00093159	0.0123167	12	SFRP2,MFAP5,HTR2B,FRAS1,WNT2,FBN1,EFEMP1,PDGFRA,UGDH,KLF4,ALDH1A3,DKK1	0.000896781	0.00632343
GO_BP	GO:2000241_REGULATION_OF_REPRODUCTIVE_PROCESS	4	ACVR1C,INHBA,NRK,ZNF711	0.0460415	0.0906637	3	IGF1,SERPINF1,SMURF2	0.0391976	0.0689697
GO_BP	GO:0048638_REGULATION_OF_DEVELOPMENTAL_GROWTH	8	PLXNA4,EPPK1,SEMA6D,GHR,FGFR2,SEMA6A,HEY2,NRK	0.0193207	0.0518531	6	SEMA3C,IGF1,SFRP2,CXCL12,TGFBR3,WNT2	0.0162136	0.0369466
GO_BP	GO:0097485_NEURON_PROJECTION_GUIDANCE	9	VLDLR,PLXNA4,GPC1,LHX2,NFASC,SEMA6D,SEMA6A,MYH10,MATN2	0.0024844	0.0172167	7	SEMA3C,CXCL12,CHL1,GFRA1,PLXNC1,LAMA2,NTN4	0.00194944	0.00943295
GO_BP	GO:1901343_NEGATIVE_REGULATION_OF_VASCULATURE_DEVELOPMENT	5	COL4A2,EMILIN1,SEMA6A,HEY2,TNMD	0.00590472	0.0268473	4	CXCL10,SERPINF1,KLF4,DCN	0.00434895	0.0155065
GO_BP	GO:0034767_POSITIVE_REGULATION_OF_ION_TRANSMEMBRANE_TRANSPORT	5	KCNMB1,JPH2,HSPA2,KCNH2,FLNA	0.0128714	0.0404469	4	CXCL11,CXCL10,CXCL9,CRACR2A	0.00870715	0.0240584
GO_BP	GO:1901136_CARBOHYDRATE_DERIVATIVE_CATABOLIC_PROCESS	5	CSPG4,GPC1,ACAN,GPC4,SDC1	0.029802	0.0680206	4	LUM,NT5E,LYVE1,DCN	0.0186496	0.040854
GO_BP	GO:1901135_CARBOHYDRATE_DERIVATIVE_METABOLIC_PROCESS	19	CSPG4,ACOT1,EOGT,GPC1,ITIH5,HACD1,ENPP1,PDK3,AK4,ANGPT1,ACAN,PRKAA2,GPC4,SDC1,ST6GAL2,ENO2,PAWR,ST6GALNAC5,COL11A1	0.0465442	0.091026	14	IGF1,LUM,NT5E,LYVE1,HS6ST2,KYNU,TMTC1,PCSK6,GALNT12,UAP1,HAS1,UGDH,DCN,GFPT2	0.0288876	0.0560015
GO_BP	GO:0006023_AMINOGLYCAN_BIOSYNTHETIC_PROCESS	6	CSPG4,GPC1,ANGPT1,ACAN,GPC4,SDC1	0.000527902	0.00885702	5	LUM,HS6ST2,HAS1,UGDH,DCN	0.000324631	0.00346321
GO_BP	GO:0010876_LIPID_LOCALIZATION	9	VLDLR,LPL,ACVR1C,ENPP1,PRKAA2,THRSP,INHBA,ADIPOQ,CES1	0.0289203	0.0670212	7	ABCA8,PLTP,C3,ABCA6,PLA2G2A,ABCA9,CDS1	0.0171022	0.0382065
GO_BP	GO:0019932_SECOND_MESSENGER_MEDIATED_SIGNALING	10	ITPR1,ADGRL1,JPH2,IRAG1,CASQ2,GNAI1,MCTP2,GNAL,PRKAR2B,ADGRL3	0.0227288	0.0572008	8	IGF1,CXCL11,CXCL10,CXCL9,HTR2B,CLIC2,ADGRG2,ADGRD1	0.0103059	0.0266788
GO_BP	GO:0050878_REGULATION_OF_BODY_FLUID_LEVELS	10	CD9,ITPR1,AKAP1,MYL9,CSRP1,KALRN,SLC29A1,EMP2,FLNA,PRKAR2B	0.0465344	0.091026	8	F2RL1,PDPN,F13A1,DOCK8,SERPING1,TFPI,THBD,PDGFRA	0.0204803	0.0439339
GO_BP	GO:0098609_CELL_CELL_ADHESION	23	PTPRF,CD9,MYL9,CSRP1,MAGI1,ADAM19,ADGRL1,FBLIM1,ITGA7,FLNA,NFASC,LPP,FAT3,ITGA8,GPC4,PCK1,COL8A2,CDH1,PAWR,BAIAP2L1,ADGRL3,ADIPOQ,CYFIP2	0.000120763	0.00368583	18	IGF1,CXCL13,CXCL12,DPP4,NT5E,PDPN,IDO1,STXBP6,VSIG4,LRRC32,DOCK8,IL20RB,PDGFRA,CD55,IL2RA,KLF4,NINJ2,CLDN11	4.94583e-05	0.000964437
GO_BP	GO:0006022_AMINOGLYCAN_METABOLIC_PROCESS	7	CSPG4,GPC1,ITIH5,ANGPT1,ACAN,GPC4,SDC1	0.00128912	0.0137216	6	LUM,LYVE1,HS6ST2,HAS1,UGDH,DCN	0.000480156	0.00446207
GO_BP	GO:0198738_CELL_CELL_SIGNALING_BY_WNT	11	DAAM2,DACT3,DIXDC1,TGFB1I1,PRKAA2,GPC4,FGFR2,SDC1,NXN,CPE,GREM1	0.023284	0.0584808	9	SFRP2,ALPK2,WNT2,DAB2,SMURF2,CPZ,KLF4,IGFBP6,DKK1	0.00803222	0.0226121
GO_BP	GO:0051271_NEGATIVE_REGULATION_OF_CELLULAR_COMPONENT_MOVEMENT	12	CD9,ACTN1,IDH2,EMILIN1,EPPK1,ACVR1C,SEMA6D,MYOCD,SEMA6A,CDH1,ADIPOQ,GREM1	0.0001424	0.00421182	10	SEMA3C,CXCL13,SFRP2,CXCL12,DPP4,SERPINF1,TGFBR3,HAS1,KLF4,DCN	4.80973e-05	0.000947104
GO_BP	GO:0007187_G_PROTEIN_COUPLED_RECEPTOR_SIGNALING_PATHWAY_COUPLED_TO_CYCLIC_NUCLEOTIDE_SECOND_MESSENGER	7	ADGRL1,EDNRA,FLNA,SSTR1,GNAI1,GNAL,ADGRL3	0.0119563	0.0394284	6	CXCL11,CXCL10,CXCL9,HTR2B,ADGRG2,ADGRD1	0.00403796	0.0147126
GO_BP	GO:0048645_ANIMAL_ORGAN_FORMATION	2	FGFR2,EYA1	0.0426566	0.0858819	2	WNT2,DKK1	0.0143498	0.0338672
GO_BP	GO:0048747_MUSCLE_FIBER_DEVELOPMENT	2	MYH11,CAV2	0.0377453	0.078987	2	TTN,NEBL	0.0125833	0.0304534
GO_BP	GO:0043388_POSITIVE_REGULATION_OF_DNA_BINDING	2	MYOCD,MMP9	0.0361765	0.0774079	2	IGF1,KLF4	0.012024	0.029704
GO_BP	GO:0006949_SYNCYTIUM_FORMATION	2	CD9,TANC1	0.0331426	0.0726403	2	CXCL10,CXCL9	0.0109491	0.0278067
GO_BP	GO:0001755_NEURAL_CREST_CELL_MIGRATION	2	SEMA6D,SEMA6A	0.0316777	0.0710653	2	SEMA3C,HTR2B	0.0104335	0.0268048
GO_BP	GO:0060688_REGULATION_OF_MORPHOGENESIS_OF_A_BRANCHING_STRUCTURE	2	FGFR2,GREM1	0.0316777	0.0710653	2	WNT2,NTN4	0.0104335	0.0268048
GO_BP	GO:0010830_REGULATION_OF_MYOTUBE_DIFFERENTIATION	2	MYOCD,RBM24	0.0302478	0.0686557	2	CXCL10,CXCL9	0.00993229	0.0260376
GO_BP	GO:0044273_SULFUR_COMPOUND_CATABOLIC_PROCESS	2	CSPG4,ACAN	0.0288528	0.066973	2	LUM,DCN	0.00944548	0.0250232
GO_BP	GO:0060038_CARDIAC_MUSCLE_CELL_PROLIFERATION	2	FGFR2,HEY2	0.0274929	0.0644947	2	TGFBR3,WNT2	0.00897294	0.0243087
GO_BP	GO:0045661_REGULATION_OF_MYOBLAST_DIFFERENTIATION	2	MYOCD,RBM24	0.0274929	0.0644947	2	CXCL10,CXCL9	0.00897294	0.0243087
GO_BP	GO:2000677_REGULATION_OF_TRANSCRIPTION_REGULATORY_REGION_DNA_BINDING	2	LHX2,HEY2	0.0248787	0.0603865	2	IGF1,KLF4	0.00807039	0.0226121
GO_BP	GO:1900274_REGULATION_OF_PHOSPHOLIPASE_C_ACTIVITY	2	NTF3,EDNRA	0.021222	0.0549017	2	HTR2B,PDGFRA	0.00682136	0.0204691
GO_BP	GO:0009409_RESPONSE_TO_COLD	2	LPL,HSPA2	0.0200738	0.0530062	2	CXCL10,METRNL	0.00643255	0.0195942
GO_BP	GO:0002686_NEGATIVE_REGULATION_OF_LEUKOCYTE_MIGRATION	2	EMILIN1,GREM1	0.0178832	0.0494801	2	CXCL12,DPP4	0.00569551	0.0182364
GO_BP	GO:0010828_POSITIVE_REGULATION_OF_GLUCOSE_TRANSMEMBRANE_TRANSPORT	2	SORBS1,ADIPOQ	0.0168407	0.0475552	2	IGF1,C3	0.00534704	0.0177396
GO_BP	GO:0007520_MYOBLAST_FUSION	2	CD9,TANC1	0.0158334	0.0459295	2	CXCL10,CXCL9	0.00501175	0.0167629
GO_BP	GO:0010656_NEGATIVE_REGULATION_OF_MUSCLE_CELL_APOPTOTIC_PROCESS	2	MYOCD,HEY2	0.0105193	0.0361309	2	IGF1,SFRP2	0.0032685	0.0129805
GO_BP	GO:0051154_NEGATIVE_REGULATION_OF_STRIATED_MUSCLE_CELL_DIFFERENTIATION	2	SOX6,MYOCD	0.00975352	0.0343348	2	CXCL10,DKK1	0.00302118	0.0122652
GO_BP	GO:0140448_SIGNALING_RECEPTOR_LIGAND_PRECURSOR_PROCESSING	2	CPE,CES1	0.0090214	0.0327477	2	CPA3,PCSK6	0.00278574	0.0114315
GO_BP	GO:0060045_POSITIVE_REGULATION_OF_CARDIAC_MUSCLE_CELL_PROLIFERATION	2	FGFR2,HEY2	0.0038865	0.0209965	2	TGFBR3,WNT2	0.00116686	0.00713615
GO_BP	GO:1905209_POSITIVE_REGULATION_OF_CARDIOCYTE_DIFFERENTIATION	2	MYOCD,GREM1	0.0038865	0.0209965	2	SEMA3C,IGF1	0.00116686	0.00713615
GO_BP	GO:0097205_RENAL_FILTRATION	2	MCAM,EMP2	0.00346927	0.020178	2	JCHAIN,F2RL1	0.00103833	0.00667619
GO_BP	GO:1905114_CELL_SURFACE_RECEPTOR_SIGNALING_PATHWAY_INVOLVED_IN_CELL_CELL_SIGNALING	12	DAAM2,DACT3,DIXDC1,SLC29A1,TGFB1I1,PRKAA2,GPC4,FGFR2,SDC1,NXN,CPE,GREM1	0.0389275	0.0810472	10	SFRP2,ALPK2,WNT2,DAB2,SMURF2,CPZ,C3,KLF4,IGFBP6,DKK1	0.0104933	0.0269295
GO_BP	GO:0051098_REGULATION_OF_BINDING	8	PTPRF,LDOC1,LHX2,ANGPT1,MYOCD,HEY2,ADIPOQ,MMP9	0.0358051	0.0768898	7	IGF1,EBF2,TGFBR3,CLIC2,DAB2,KLF4,DKK1	0.00919868	0.0245332
GO_BP	GO:0048762_MESENCHYMAL_CELL_DIFFERENTIATION	8	DACT3,TGFB1I1,EDNRA,SEMA6D,FGFR2,SEMA6A,HEY2,GREM1	0.00151569	0.0137931	7	SEMA3C,SFRP2,PDPN,HTR2B,TGFBR3,WNT2,DAB2	0.000384763	0.00381396
GO_BP	GO:0048259_REGULATION_OF_RECEPTOR_MEDIATED_ENDOCYTOSIS	3	NTF3,ANGPT1,GREM1	0.0329701	0.0723174	3	DAB2,C3,DKK1	0.0081742	0.0227444
GO_BP	GO:0010717_REGULATION_OF_EPITHELIAL_TO_MESENCHYMAL_TRANSITION	3	DACT3,TGFB1I1,GREM1	0.0251377	0.0608609	3	SFRP2,PDPN,DAB2	0.00607455	0.01932
GO_BP	GO:0030901_MIDBRAIN_DEVELOPMENT	3	CKB,FGFR2,MAOB	0.0225242	0.0567856	3	SFRP2,WNT2,DKK1	0.00539066	0.0177396
GO_BP	GO:0003151_OUTFLOW_TRACT_MORPHOGENESIS	3	FGFR2,HEY2,EYA1	0.0157118	0.0459295	3	SEMA3C,SFRP2,TGFBR3	0.00365227	0.013902
GO_BP	GO:0071300_CELLULAR_RESPONSE_TO_RETINOIC_ACID	3	FGFR2,PCK1,TNC	0.00843435	0.0319658	3	SERPINF1,WNT2,KLF4	0.0018791	0.00914186
GO_BP	GO:0050922_NEGATIVE_REGULATION_OF_CHEMOTAXIS	3	SEMA6D,SEMA6A,GREM1	0.00531001	0.0245997	3	SEMA3C,CXCL13,DPP4	0.00115226	0.00713615
GO_BP	GO:1901137_CARBOHYDRATE_DERIVATIVE_BIOSYNTHETIC_PROCESS	13	CSPG4,EOGT,GPC1,HACD1,PDK3,AK4,ANGPT1,ACAN,GPC4,SDC1,ST6GAL2,PAWR,ST6GALNAC5	0.0301346	0.0686557	11	IGF1,LUM,NT5E,HS6ST2,TMTC1,GALNT12,UAP1,HAS1,UGDH,DCN,GFPT2	0.00631854	0.0193914
GO_BP	GO:0003206_CARDIAC_CHAMBER_MORPHOGENESIS	4	FGFR2,HEY2,CPE,COL11A1	0.0217986	0.0561403	4	SEMA3C,SFRP2,TGFBR3,WNT2	0.00394462	0.0147126
GO_BP	GO:0051235_MAINTENANCE_OF_LOCATION	9	ITPR1,LPL,JPH2,ACVR1C,ENPP1,FLNA,CASQ2,TMSB15A,CES1	0.00557818	0.0256471	8	CXCL11,CXCL10,CXCL9,HTR2B,CLIC2,FBN1,C3,CDS1	0.00100854	0.00664631
GO_BP	GO:0007162_NEGATIVE_REGULATION_OF_CELL_ADHESION	9	CD9,PLXNA4,ANGPT1,SEMA6A,TNC,ADAM22,CDH1,PAWR,ADIPOQ	0.00201148	0.0156417	8	CXCL12,IDO1,VSIG4,LRRC32,PLXNC1,IL20RB,IL2RA,KLF4	0.000360044	0.00380686
GO_BP	GO:0009628_RESPONSE_TO_ABIOTIC_STIMULUS	25	FBXL22,MYLK,CD9,TANC1,ITPR1,EGLN3,SLC29A1,KCNMB1,RPE65,LPL,KCNK3,HSPA2,TGFB1I1,CA2,EDNRA,PDK3,AK4,MYOCD,PCK1,TNC,ANO1,EYA1,ADIRF,ADIPOQ,COL11A1	0.00373696	0.0209965	20	VEGFD,TTN,IGF1,SFRP2,CXCL12,CXCL10,DPP4,SERPINF1,PDPN,LXN,SCARA5,HTR2B,CD14,TGFBR3,THBD,METRNL,DCN,PTGIS,LRRC8D,CDS1	0.000668541	0.00535508
GO_BP	GO:0051153_REGULATION_OF_STRIATED_MUSCLE_CELL_DIFFERENTIATION	4	SOX6,MYOCD,RBM24,GREM1	0.00698062	0.0292891	4	IGF1,CXCL10,CXCL9,DKK1	0.00113391	0.00713615
GO_BP	GO:0006029_PROTEOGLYCAN_METABOLIC_PROCESS	4	CSPG4,GPC1,ACAN,COL11A1	0.00510014	0.0241038	4	IGF1,HS6ST2,UGDH,DCN	0.000808883	0.0060714
GO_BP	GO:0043062_EXTRACELLULAR_STRUCTURE_ORGANIZATION	20	SMOC1,MYH11,COL4A2,ADAM19,EMILIN1,COL4A6,COL4A5,COL4A1,ITGA7,CAV2,COL15A1,ACAN,ITGA8,TNC,COL8A2,CDH1,SCUBE3,GREM1,MMP9,COL11A1	1.54483e-08	3.69343e-06	17	LUM,DPT,SFRP2,MFAP5,DPP4,PDPN,ADAMTS2,FBLN2,ADAMTS5,ABI3BP,HAS1,FBN1,LAMA2,PDGFRA,TNXB,DCN,NTN4	2.44877e-09	4.85469e-07
GO_BP	GO:0042445_HORMONE_METABOLIC_PROCESS	5	RPE65,HSD17B6,GHR,CPE,CES1	0.0486007	0.0942131	5	CPA3,DIO2,PCSK6,PDGFRA,ALDH1A3	0.00769204	0.022074
GO_BP	GO:0031099_REGENERATION	5	PTPRF,CD9,EPPK1,TNC,MATN2	0.028495	0.0664112	5	IGF1,CXCL12,TGFBR3,KLF4,NINJ2	0.00413081	0.0149123
GO_BP	GO:0001667_AMEBOIDAL_TYPE_CELL_MIGRATION	10	EPPK1,EMP2,ACVR1C,SEMA6D,ANGPT1,SEMA6A,S100A2,CENPV,GREM1,MMP9	0.0113712	0.0376287	9	SEMA3C,CXCL13,DPP4,SERPINF1,HTR2B,HAS1,SMURF2,KLF4,DCN	0.00159269	0.00857244
GO_BP	GO:0045165_CELL_FATE_COMMITMENT	6	TGFB1I1,SOX6,FGFR2,HEY2,EYA1,HOXC10	0.046222	0.0906637	6	SFRP2,EBF2,PDPN,WNT2,KLF4,DKK1	0.0057712	0.0184539
GO_BP	GO:0001837_EPITHELIAL_TO_MESENCHYMAL_TRANSITION	5	DACT3,TGFB1I1,FGFR2,HEY2,GREM1	0.00834388	0.0316648	5	SFRP2,PDPN,TGFBR3,WNT2,DAB2	0.00103594	0.00667619
GO_BP	GO:0042592_HOMEOSTATIC_PROCESS	31	ITPR1,SLC29A1,RPE65,LPL,TUB,SLMAP,FHL1,CKB,JPH2,KCNK3,CA2,EDNRA,ENPP1,PDK3,KCNH2,CAV2,SOX6,HEPH,CASQ2,ANGPT1,PRKAA2,SLC24A3,PCK1,CCNE2,ANO1,HOXC10,INHBA,PRKAR2B,ADIPOQ,CA12,CES1	0.0385795	0.0804394	25	STEAP4,JCHAIN,CXCL13,EBF2,DIO2,CXCL11,CXCL12,CXCL10,F2RL1,SERPINF1,CXCL9,SCARA5,HTR2B,TGFBR3,CLIC2,ADAMTS5,IL20RB,LAMA2,METRNL,PDGFRA,CD55,IL2RA,DCN,PLA2G2A,FAM20A	0.00454752	0.0160512
GO_BP	GO:1903844_REGULATION_OF_CELLULAR_RESPONSE_TO_TRANSFORMING_GROWTH_FACTOR_BETA_STIMULUS	5	EMILIN1,TGFB1I1,CAV2,ITGA8,MYOCD	0.00342261	0.0201632	5	TGFBR3,FBN1,DAB2,SMURF2,HTRA3	0.000390673	0.00382474
GO_BP	GO:0072330_MONOCARBOXYLIC_ACID_BIOSYNTHETIC_PROCESS	6	CSPG4,LPL,HACD1,PRKAA2,ADIPOQ,CES1	0.0246059	0.0603762	6	IDO1,PTGES,DCN,HSD3B7,PTGIS,ALDH1A3	0.00273194	0.0114315
GO_BP	GO:0019935_CYCLIC_NUCLEOTIDE_MEDIATED_SIGNALING	6	ADGRL1,IRAG1,GNAI1,GNAL,PRKAR2B,ADGRL3	0.0190304	0.0513142	6	CXCL11,CXCL10,CXCL9,HTR2B,ADGRG2,ADGRD1	0.00202622	0.0096795
GO_BP	GO:0043010_CAMERA_TYPE_EYE_DEVELOPMENT	7	RPE65,TUB,COL4A1,LHX2,COL8A2,MYH10,INHBA	0.0478648	0.0929882	7	SERPINF1,WNT2,FBN1,EFEMP1,PDGFRA,KLF4,ALDH1A3	0.00483761	0.0163708
GO_BP	GO:0050801_ION_HOMEOSTASIS	16	ITPR1,SLMAP,FHL1,CKB,JPH2,KCNK3,CA2,EDNRA,ENPP1,KCNH2,CAV2,HEPH,CASQ2,PRKAA2,SLC24A3,CA12	0.0197723	0.0529168	14	STEAP4,CXCL13,CXCL11,CXCL12,CXCL10,F2RL1,CXCL9,SCARA5,HTR2B,CLIC2,PDGFRA,CD55,DCN,FAM20A	0.00196962	0.00946613
GO_BP	GO:0006898_RECEPTOR_MEDIATED_ENDOCYTOSIS	7	VLDLR,CD9,NTF3,CAV2,ANGPT1,SNAP25,GREM1	0.0209369	0.0543602	7	JCHAIN,MRC1,HTR2B,CD14,DAB2,C3,DKK1	0.00178138	0.00879231
GO_BP	GO:0045597_POSITIVE_REGULATION_OF_CELL_DIFFERENTIATION	18	VLDLR,PLXNA4,GPC1,KALRN,LPL,TGFB1I1,CA2,FLNA,SOX6,MYOCD,SEMA6A,PCK1,ADIRF,INHBA,PCP4,RBM24,ADIPOQ,GREM1	0.0326239	0.0718326	16	SEMA3C,IGF1,SFRP2,CXCL12,SERPINF1,CXCL9,PDPN,WNT2,PLXNC1,DAB2,METRNL,IL2RA,MEDAG,PLA2G2A,DKK1,CDS1	0.00225986	0.0099744
GO_BP	GO:0022610_BIOLOGICAL_ADHESION	42	PTPRF,MCAM,CD9,PLXNA4,ACTN1,MYL9,SORBS1,AOC3,CSRP1,MAGI1,ADAM19,EMILIN1,ADGRL1,FBLIM1,COL4A6,EMP2,TGFB1I1,ITGA7,FLNA,NFASC,COL15A1,LPP,ANGPT1,ACAN,FAT3,ITGA8,GPC4,SEMA6A,PCK1,TNC,PGM5,ADAM22,COL8A2,MYH10,CDH1,PAWR,SUSD5,BAIAP2L1,ADGRL3,ADIPOQ,CYFIP2,GREM1	2.58667e-08	5.30082e-06	34	IGF1,CXCL13,DPT,SFRP2,CXCL12,CHL1,DPP4,NT5E,LYVE1,PDPN,TNFAIP6,APBB1IP,IDO1,STXBP6,VSIG4,FBLN2,LRRC32,CCN5,DOCK8,PLXNC1,ABI3BP,HAS1,FBN1,IL20RB,EMILIN2,LAMA2,PDGFRA,TNXB,CD55,IL2RA,KLF4,NINJ2,NTN4,CLDN11	1.52975e-09	3.30844e-07
GO_BP	GO:0060420_REGULATION_OF_HEART_GROWTH	2	FGFR2,HEY2	0.0496764	0.0954749	3	IGF1,TGFBR3,WNT2	0.00210107	0.00991153
GO_BP	GO:0045807_POSITIVE_REGULATION_OF_ENDOCYTOSIS	3	NTF3,ANGPT1,GREM1	0.0329701	0.0723174	4	F2RL1,CD14,DAB2,C3	0.00118721	0.00722349
GO_BP	GO:0035051_CARDIOCYTE_DIFFERENTIATION	8	MYH11,ALPK3,SOX6,MYOCD,HEY2,MYH10,ACTC1,GREM1	3.7995e-05	0.00184759	8	TTN,SEMA3C,IGF1,ALPK2,TGFBR3,NEBL,PDGFRA,DKK1	1.23927e-06	8.42346e-05
GO_BP	GO:1903035_NEGATIVE_REGULATION_OF_RESPONSE_TO_WOUNDING	3	CD9,WFDC1,EPPK1	0.023376	0.0585728	4	SERPING1,TFPI,THBD,PDGFRA	0.000730368	0.00571561
GO_BP	GO:0009791_POST_EMBRYONIC_DEVELOPMENT	3	ITPR1,SOX6,FGFR2	0.0208783	0.0542572	4	SEMA3C,FBN1,EFEMP1,KLF4	0.000623459	0.00516379
GO_BP	GO:0006897_ENDOCYTOSIS	12	VLDLR,SORT1,CD9,STON1,NTF3,TUB,ENPP1,CAV2,ANGPT1,GHR,SNAP25,GREM1	0.0252921	0.0611831	12	IGHG1,JCHAIN,F2RL1,MRC1,SCARA5,HTR2B,CD14,RAB27B,DAB2,PRG4,C3,DKK1	0.000753132	0.00587443
GO_BP	GO:0009887_ANIMAL_ORGAN_MORPHOGENESIS	24	MYLK,ACTG2,KCNQ4,LRIG1,RPE65,FHL1,ACTA2,CA2,SOX6,ACAN,ITGA8,GPC4,FGFR2,SDC1,SEMA6A,HEY2,TNC,EYA1,COL8A2,CPE,INHBA,ACTC1,GREM1,COL11A1	0.00140459	0.0137216	21	TTN,SEMA3C,SFRP2,MFAP5,ALPK2,HTR2B,TGFBR3,FRAS1,ADAMTS5,WNT2,FBN1,DAB2,SMURF2,LAMA2,EFEMP1,PDGFRA,DCN,NTN4,ALDH1A3,FAM20A,DKK1	4.17886e-05	0.000857026
GO_BP	GO:0046622_POSITIVE_REGULATION_OF_ORGAN_GROWTH	2	FGFR2,HEY2	0.021222	0.0549017	3	IGF1,TGFBR3,WNT2	0.000600343	0.00516379
GO_BP	GO:1903845_NEGATIVE_REGULATION_OF_CELLULAR_RESPONSE_TO_TRANSFORMING_GROWTH_FACTOR_BETA_STIMULUS	3	EMILIN1,TGFB1I1,CAV2	0.017095	0.0481311	4	TGFBR3,FBN1,SMURF2,HTRA3	0.00047189	0.00440489
GO_BP	GO:0002009_MORPHOGENESIS_OF_AN_EPITHELIUM	12	SHROOM3,COL4A1,TGFB1I1,CA2,EDNRA,LHX2,FLNA,GPC4,FGFR2,TNC,EYA1,GREM1	0.0176093	0.0492889	12	SEMA3C,SFRP2,CXCL10,PDPN,FRAS1,WNT2,DAB2,SMURF2,KLF4,NTN4,ALDH1A3,DKK1	0.000472151	0.00440489
GO_BP	GO:0061045_NEGATIVE_REGULATION_OF_WOUND_HEALING	3	CD9,WFDC1,EPPK1	0.012569	0.0396706	4	SERPING1,TFPI,THBD,PDGFRA	0.000308456	0.00338165
GO_BP	GO:0085029_EXTRACELLULAR_MATRIX_ASSEMBLY	2	MYH11,EMILIN1	0.014861	0.0440458	3	HAS1,TNXB,NTN4	0.000358523	0.00380686
GO_BP	GO:1903510_MUCOPOLYSACCHARIDE_METABOLIC_PROCESS	4	CSPG4,ITIH5,ANGPT1,ACAN	0.0125425	0.0396304	5	LUM,LYVE1,HAS1,UGDH,DCN	0.000295077	0.00327984
GO_BP	GO:0048880_SENSORY_SYSTEM_DEVELOPMENT	8	SMOC1,RPE65,TUB,COL4A1,LHX2,COL8A2,MYH10,INHBA	0.0494921	0.0952724	9	MFAP5,SERPINF1,WNT2,FBN1,C3,EFEMP1,PDGFRA,KLF4,ALDH1A3	0.00115496	0.00713615
GO_BP	GO:0060421_POSITIVE_REGULATION_OF_HEART_GROWTH	2	FGFR2,HEY2	0.0105193	0.0361309	3	IGF1,TGFBR3,WNT2	0.000218265	0.0026358
GO_BP	GO:1901342_REGULATION_OF_VASCULATURE_DEVELOPMENT	8	COL4A2,EMILIN1,EMP2,MYOCD,SEMA6A,HEY2,TNMD,GREM1	0.0225902	0.0569019	9	VEGFD,CXCL13,SFRP2,CXCL10,SERPINF1,C3,KLF4,DCN,PTGIS	0.000378716	0.00381396
GO_BP	GO:0042127_REGULATION_OF_CELL_POPULATION_PROLIFERATION	31	CD9,SPEG,IDH2,WFDC1,EGLN3,NTF3,EPPK1,LDOC1,EMP2,TGFB1I1,ACVR1C,CNN1,LHX2,FLNA,CAV2,ANGPT1,SSTR1,FGFR2,MYOCD,HEY2,TNC,EYA1,BCHE,HOXC10,TNMD,PAWR,INHBA,NRK,ADIPOQ,GREM1,MMP9	0.00390068	0.0209965	27	VEGFD,IGF1,DPT,SFRP2,CXCL11,CXCL12,CXCL10,DPP4,SERPINF1,CXCL9,PDPN,IDO1,CXCL1,PTGES,HTR2B,VSIG4,LRRC32,TGFBR3,WNT2,RARRES1,IL20RB,CD248,PDGFRA,CD55,IL2RA,KLF4,IGFBP6	6.43702e-05	0.00112601
GO_BP	GO:0090287_REGULATION_OF_CELLULAR_RESPONSE_TO_GROWTH_FACTOR_STIMULUS	11	GPC1,NTF3,EMILIN1,TGFB1I1,CAV2,ITGA8,MYOCD,SEMA6A,TNMD,CYFIP2,GREM1	0.00014181	0.00421182	11	CXCL13,SFRP2,FSTL1,TGFBR3,PCSK6,FBN1,DAB2,SMURF2,DCN,HTRA3,DKK1	2.08346e-06	0.000115269
GO_BP	GO:0055003_CARDIAC_MYOFIBRIL_ASSEMBLY	2	MYH10,ACTC1	0.00154325	0.0137931	3	TTN,NEBL,PDGFRA	1.43393e-05	0.000387651
GO_BP	GO:0030199_COLLAGEN_FIBRIL_ORGANIZATION	4	EMILIN1,ACAN,GREM1,COL11A1	0.000439576	0.00816604	5	LUM,DPT,SFRP2,ADAMTS2,TNXB	3.7333e-06	0.000181256
GO_BP	GO:0090092_REGULATION_OF_TRANSMEMBRANE_RECEPTOR_PROTEIN_SERINE_THREONINE_KINASE_SIGNALING_PATHWAY	8	EMILIN1,TGFB1I1,CAV2,RBPMS,ITGA8,MYOCD,INHBA,GREM1	0.00253033	0.0174089	9	SFRP2,FSTL1,TGFBR3,PCSK6,FBN1,DAB2,SMURF2,HTRA3,DKK1	2.06308e-05	0.000500824
GO_BP	GO:0055006_CARDIAC_CELL_DEVELOPMENT	5	MYH11,ALPK3,HEY2,MYH10,ACTC1	0.000323662	0.00672888	6	TTN,IGF1,ALPK2,TGFBR3,NEBL,PDGFRA	2.42035e-06	0.000125174
GO_BP	GO:0090288_NEGATIVE_REGULATION_OF_CELLULAR_RESPONSE_TO_GROWTH_FACTOR_STIMULUS	7	GPC1,EMILIN1,TGFB1I1,CAV2,SEMA6A,TNMD,GREM1	0.00059995	0.00951105	8	CXCL13,SFRP2,TGFBR3,FBN1,SMURF2,DCN,HTRA3,DKK1	3.99523e-06	0.000181741
GO_BP	GO:0022603_REGULATION_OF_ANATOMICAL_STRUCTURE_MORPHOGENESIS	20	PLXNA4,COL4A2,KALRN,EMILIN1,FBLIM1,SHROOM3,EMP2,ITGA7,CDC42EP3,FLNA,SEMA6D,GPC4,FGFR2,SEMA6A,HEY2,EYA1,MYH10,TNMD,ADIPOQ,GREM1	0.025026	0.0606929	20	VEGFD,SEMA3C,CXCL13,SFRP2,CXCL12,CXCL10,SERPINF1,CXCL9,PDPN,WNT2,PLXNC1,DAB2,SMURF2,C3,KLF4,DCN,EPB41L3,PTGIS,NTN4,DKK1	0.000150742	0.0019923
GO_BP	GO:0003007_HEART_MORPHOGENESIS	6	FGFR2,HEY2,EYA1,CPE,ACTC1,COL11A1	0.0362252	0.0774079	8	TTN,SEMA3C,SFRP2,ALPK2,HTR2B,TGFBR3,WNT2,DKK1	0.000204647	0.00252257
GO_BP	GO:0071396_CELLULAR_RESPONSE_TO_LIPID	13	KCNMB1,LPL,LDOC1,PDK3,SSTR1,PRKAA2,FGFR2,PCK1,TNC,GNAI1,FBXO32,INHBA,CES1	0.0105059	0.0361309	14	CXCL13,CXCL11,CXCL10,SERPINF1,CXCL9,MRC1,CXCL1,CD14,WNT2,DAB2,TRERF1,TFPI,CD55,KLF4	5.36373e-05	0.000989173
GO_BP	GO:0032526_RESPONSE_TO_RETINOIC_ACID	3	FGFR2,PCK1,TNC	0.0396806	0.082179	5	SERPINF1,PTGES,WNT2,KLF4,DKK1	0.000197285	0.00244449
GO_BP	GO:0061041_REGULATION_OF_WOUND_HEALING	4	MYLK,CD9,WFDC1,EPPK1	0.0304718	0.0690551	6	F2RL1,PDPN,SERPING1,TFPI,THBD,PDGFRA	0.000148018	0.00196723
GO_BP	GO:0007179_TRANSFORMING_GROWTH_FACTOR_BETA_RECEPTOR_SIGNALING_PATHWAY	5	EMILIN1,TGFB1I1,CAV2,ITGA8,MYOCD	0.027856	0.0652398	7	LRRC32,TGFBR3,LTBP2,FBN1,DAB2,SMURF2,HTRA3	0.000135175	0.00186369
GO_BP	GO:1903034_REGULATION_OF_RESPONSE_TO_WOUNDING	5	PTPRF,MYLK,CD9,WFDC1,EPPK1	0.019387	0.0519824	7	F2RL1,PDPN,SERPING1,TFPI,THBD,PDGFRA,KLF4	7.53156e-05	0.00125713
GO_BP	GO:0045444_FAT_CELL_DIFFERENTIATION	6	SORT1,LPL,TGFB1I1,ENPP1,ADIRF,ADIPOQ	0.0194575	0.0521228	8	STEAP4,SFRP2,EBF2,DIO2,METRNL,KLF4,MEDAG,CDS1	7.55651e-05	0.00125713
GO_BP	GO:0030166_PROTEOGLYCAN_BIOSYNTHETIC_PROCESS	2	CSPG4,ACAN	0.0443615	0.0880173	4	IGF1,HS6ST2,UGDH,DCN	0.000165947	0.00218115
GO_BP	GO:0050918_POSITIVE_CHEMOTAXIS	2	NTF3,ANGPT1	0.0393483	0.0816861	4	VEGFD,CXCL12,CXCL10,F2RL1	0.000132018	0.00186369
GO_BP	GO:0090101_NEGATIVE_REGULATION_OF_TRANSMEMBRANE_RECEPTOR_PROTEIN_SERINE_THREONINE_KINASE_SIGNALING_PATHWAY	4	EMILIN1,TGFB1I1,CAV2,GREM1	0.0154259	0.0455787	6	SFRP2,TGFBR3,FBN1,SMURF2,HTRA3,DKK1	4.81713e-05	0.000947104
GO_BP	GO:0051094_POSITIVE_REGULATION_OF_DEVELOPMENTAL_PROCESS	24	VLDLR,PLXNA4,GPC1,KALRN,ADGRL1,LPL,TGFB1I1,CA2,FLNA,SOX6,GHR,FGFR2,MYOCD,SEMA6A,PCK1,HEY2,ADIRF,PAWR,INHBA,PCP4,RBM24,ADGRL3,ADIPOQ,GREM1	0.0289615	0.0670626	24	VEGFD,SEMA3C,IGF1,SFRP2,CXCL12,SERPINF1,CXCL9,PDPN,IDO1,TGFBR3,WNT2,PLXNC1,DAB2,SMURF2,C3,METRNL,IL2RA,KLF4,MEDAG,DCN,PLA2G2A,PTGIS,DKK1,CDS1	8.67427e-05	0.00133136
GO_BP	GO:0007178_TRANSMEMBRANE_RECEPTOR_PROTEIN_SERINE_THREONINE_KINASE_SIGNALING_PATHWAY	9	EMILIN1,TGFB1I1,ACVR1C,CAV2,RBPMS,ITGA8,MYOCD,INHBA,GREM1	0.00863984	0.0326075	11	SFRP2,FSTL1,LRRC32,TGFBR3,LTBP2,PCSK6,FBN1,DAB2,SMURF2,HTRA3,DKK1	1.73904e-05	0.000444857
GO_BP	GO:0071559_RESPONSE_TO_TRANSFORMING_GROWTH_FACTOR_BETA	8	COL4A2,EMILIN1,TGFB1I1,CAV2,SOX6,ITGA8,FGFR2,MYOCD	0.00299566	0.0183827	10	MXRA5,CLEC3B,LRRC32,TGFBR3,LTBP2,WNT2,FBN1,DAB2,SMURF2,HTRA3	4.04888e-06	0.000181741
GO_BP	GO:0033993_RESPONSE_TO_LIPID	19	WFDC1,KCNMB1,LPL,LDOC1,CA2,PDK3,SSTR1,PRKAA2,FGFR2,SDC1,PCK1,TNC,GNAI1,BCHE,FBXO32,INHBA,ADIPOQ,MAOB,CES1	0.006358	0.0272992	20	CXCL13,CXCL11,CXCL10,SERPINF1,CXCL9,IDO1,MRC1,CXCL1,PTGES,CD14,TGFBR3,WNT2,DAB2,TRERF1,TFPI,THBD,CD55,KLF4,DCN,DKK1	8.25122e-06	0.000284488
GO_BP	GO:0051241_NEGATIVE_REGULATION_OF_MULTICELLULAR_ORGANISMAL_PROCESS	22	CD9,DAAM2,DACT3,IDH2,DIXDC1,COL4A2,EMILIN1,EPPK1,ACVR1C,ENPP1,LHX2,SOX6,SEMA6D,MYOCD,SEMA6A,HEY2,HOXC10,TNMD,INHBA,ADIPOQ,GREM1,MMP9	0.023636	0.0588133	24	SEMA3C,IGF1,CXCL13,SFRP2,CTSC,CXCL10,F2RL1,ALPK2,SERPINF1,IDO1,VSIG4,LRRC32,ADAMTS5,FBN1,IL20RB,SERPING1,TFPI,THBD,EFEMP1,PDGFRA,KLF4,DCN,TWIST2,DKK1	1.11128e-05	0.000323894
GO_BP	GO:0030155_REGULATION_OF_CELL_ADHESION	16	CD9,PLXNA4,MAGI1,ADAM19,EMILIN1,EMP2,FLNA,ANGPT1,SEMA6A,PCK1,TNC,ADAM22,CDH1,PAWR,ADIPOQ,GREM1	0.00603454	0.0272992	19	IGF1,CXCL13,SFRP2,CXCL12,DPP4,PDPN,APBB1IP,IDO1,VSIG4,FBLN2,LRRC32,DOCK8,PLXNC1,ABI3BP,IL20RB,LAMA2,CD55,IL2RA,KLF4	8.93455e-07	6.64228e-05
GO_BP	GO:0042330_TAXIS	13	VLDLR,PLXNA4,GPC1,NTF3,PLP2,LHX2,NFASC,SEMA6D,ANGPT1,SEMA6A,MYH10,MATN2,GREM1	0.023933	0.0594492	17	VEGFD,SEMA3C,CXCL13,CXCL11,CXCL12,CXCL10,F2RL1,CHL1,DPP4,CXCL9,CXCL1,GFRA1,PLXNC1,LAMA2,PDGFRA,HSD3B7,NTN4	3.21051e-06	0.000160777
GO_BP	GO:0051270_REGULATION_OF_CELLULAR_COMPONENT_MOVEMENT	21	MCAM,MYLK,CD9,PLXNA4,ACTN1,IDH2,NTF3,EMILIN1,EPPK1,EMP2,ACVR1C,FLNA,SEMA6D,ANGPT1,MYOCD,SEMA6A,CDH1,TMSB15A,ADIPOQ,GREM1,MMP9	0.00657178	0.0277734	25	VEGFD,SEMA3C,IGF1,CXCL13,SFRP2,CXCL12,CXCL10,F2RL1,DPP4,SERPINF1,PDPN,TNFAIP6,IL1R1,TGFBR3,DOCK8,RRAS2,PLXNC1,HAS1,DAB2,SMURF2,LAMA2,PDGFRA,KLF4,DCN,TWIST2	1.25531e-07	1.35745e-05
GO_BP	GO:0070848_RESPONSE_TO_GROWTH_FACTOR	17	SORT1,GPC1,NTF3,COL4A2,EMILIN1,TGFB1I1,ACVR1C,CAV2,SOX6,ITGA8,FGFR2,MYOCD,SEMA6A,TNC,TNMD,CYFIP2,GREM1	0.00229037	0.0162651	21	VEGFD,LUM,CXCL13,SFRP2,MXRA5,FSTL1,CLEC3B,LRRC32,TGFBR3,LTBP2,PCSK6,WNT2,HAS1,FBN1,DAB2,SMURF2,PDGFRA,KLF4,DCN,HTRA3,DKK1	3.64995e-08	4.41827e-06
GO_BP	GO:0048870_CELL_MOTILITY	31	CSPG4,PTPRF,MCAM,MYLK,CD9,PLXNA4,IDH2,DIXDC1,GPC1,NTF3,EMILIN1,EPPK1,EMP2,ACVR1C,FLNA,SEMA6D,ANGPT1,GPC4,MYOCD,SDC1,SEMA6A,MYH10,S100A2,CDH1,TMSB15A,CENPV,MATN2,ADGRL3,ADIPOQ,GREM1,MMP9	0.00500919	0.0241038	37	VEGFD,SEMA3C,JCHAIN,IGF1,CXCL13,SFRP2,CXCL11,CXCL12,CXCL10,F2RL1,CHL1,DPP4,SERPINF1,CXCL9,PDPN,TNFAIP6,CXCL1,HTR2B,IL1R1,TGFBR3,DOCK8,RRAS2,PLXNC1,HAS1,PLTP,DAB2,SMURF2,CD248,THBD,LAMA2,PDGFRA,KLF4,DCN,IGFBP6,HSD3B7,TWIST2,NTN4	1.11781e-09	2.79192e-07
GO_BP	GO:0010975_REGULATION_OF_NEURON_PROJECTION_DEVELOPMENT					7	SEMA3C,SFRP2,CXCL12,SERPINF1,PLXNC1,KLF4,DKK1	0.0499282	0.0827153
GO_BP	GO:0031344_REGULATION_OF_CELL_PROJECTION_ORGANIZATION					9	SEMA3C,SFRP2,CXCL12,F2RL1,SERPINF1,PDPN,PLXNC1,KLF4,DKK1	0.0497247	0.0824357
GO_BP	GO:0015698_INORGANIC_ANION_TRANSPORT					3	CLIC6,CLIC2,LRRC8D	0.0489889	0.0814032
GO_BP	GO:0032612_INTERLEUKIN_1_PRODUCTION					2	IGF1,F2RL1	0.0483647	0.0808571
GO_BP	GO:2001237_NEGATIVE_REGULATION_OF_EXTRINSIC_APOPTOTIC_SIGNALING_PATHWAY					2	IGF1,SFRP2	0.0483647	0.0808571
GO_BP	GO:0002708_POSITIVE_REGULATION_OF_LYMPHOCYTE_MEDIATED_IMMUNITY					2	IL1R1,C3	0.0483647	0.0808571
GO_BP	GO:0051302_REGULATION_OF_CELL_DIVISION					3	VEGFD,SFRP2,HTR2B	0.0472713	0.0792519
GO_BP	GO:0060759_REGULATION_OF_RESPONSE_TO_CYTOKINE_STIMULUS					3	F2RL1,IL1R1,KLF4	0.0472713	0.0792519
GO_BP	GO:0007584_RESPONSE_TO_NUTRIENT					3	SFRP2,CXCL10,KYNU	0.0472713	0.0792519
GO_BP	GO:0007200_PHOSPHOLIPASE_C_ACTIVATING_G_PROTEIN_COUPLED_RECEPTOR_SIGNALING_PATHWAY					2	F2RL1,HTR2B	0.0471975	0.0792519
GO_BP	GO:0006493_PROTEIN_O_LINKED_GLYCOSYLATION					2	TMTC1,GALNT12	0.0471975	0.0792519
GO_BP	GO:0002431_FC_RECEPTOR_MEDIATED_STIMULATORY_SIGNALING_PATHWAY					2	IGHG1,FCGR3A	0.0449058	0.0766253
GO_BP	GO:0043409_NEGATIVE_REGULATION_OF_MAPK_CASCADE					3	SFRP2,F2RL1,KLF4	0.0447592	0.0766253
GO_BP	GO:0035265_ORGAN_GROWTH					3	IGF1,TGFBR3,WNT2	0.0447592	0.0766253
GO_BP	GO:1901570_FATTY_ACID_DERIVATIVE_BIOSYNTHETIC_PROCESS					2	PTGES,PTGIS	0.0437814	0.0751485
GO_BP	GO:2001243_NEGATIVE_REGULATION_OF_INTRINSIC_APOPTOTIC_SIGNALING_PATHWAY					2	SFRP2,CXCL12	0.0437814	0.0751485
GO_BP	GO:0120162_POSITIVE_REGULATION_OF_COLD_INDUCED_THERMOGENESIS					2	EBF2,DIO2	0.0437814	0.0751485
GO_BP	GO:0002702_POSITIVE_REGULATION_OF_PRODUCTION_OF_MOLECULAR_MEDIATOR_OF_IMMUNE_RESPONSE					2	F2RL1,IL1R1	0.0437814	0.0751485
GO_BP	GO:2000379_POSITIVE_REGULATION_OF_REACTIVE_OXYGEN_SPECIES_METABOLIC_PROCESS					2	F2RL1,KLF4	0.0437814	0.0751485
GO_BP	GO:1990823_RESPONSE_TO_LEUKEMIA_INHIBITORY_FACTOR					2	KLF4,GFPT2	0.0437814	0.0751485
GO_BP	GO:0042116_MACROPHAGE_ACTIVATION					2	CTSC,VSIG4	0.0415756	0.0719858
GO_BP	GO:0002831_REGULATION_OF_RESPONSE_TO_BIOTIC_STIMULUS					6	F2RL1,VSIG4,CR1,SERPING1,CD55,IL2RA	0.0412865	0.0715373
GO_BP	GO:0030307_POSITIVE_REGULATION_OF_CELL_GROWTH					3	IGF1,SFRP2,CXCL12	0.0407437	0.0711147
GO_BP	GO:0003073_REGULATION_OF_SYSTEMIC_ARTERIAL_BLOOD_PRESSURE					2	CPA3,F2RL1	0.0404945	0.0707315
GO_BP	GO:0019725_CELLULAR_HOMEOSTASIS					12	CXCL13,CXCL11,CXCL12,CXCL10,F2RL1,SERPINF1,CXCL9,SCARA5,HTR2B,CLIC2,PDGFRA,CD55	0.0398735	0.069698
GO_BP	GO:0000003_REPRODUCTION					17	IGF1,SFRP2,SERPINF1,TNFAIP6,IDO1,PAQR5,ADAMTS2,ADGRG2,WNT2,HAS1,PLTP,SMURF2,THBD,PDGFRA,DCN,PTGIS,CLDN11	0.0392908	0.0689697
GO_BP	GO:0051259_PROTEIN_COMPLEX_OLIGOMERIZATION					4	STEAP4,SCARA5,UGDH,ALDH1A3	0.037624	0.0667469
GO_BP	GO:0034308_PRIMARY_ALCOHOL_METABOLIC_PROCESS					2	IGF1,ALDH1A3	0.0373383	0.066737
GO_BP	GO:1903426_REGULATION_OF_REACTIVE_OXYGEN_SPECIES_BIOSYNTHETIC_PROCESS					2	KLF4,PTGIS	0.0373383	0.066737
GO_BP	GO:1990845_ADAPTIVE_THERMOGENESIS					3	EBF2,DIO2,ADAMTS5	0.0369428	0.0661799
GO_BP	GO:0010632_REGULATION_OF_EPITHELIAL_CELL_MIGRATION					4	CXCL13,SERPINF1,KLF4,DCN	0.0364423	0.0653324
GO_BP	GO:0071674_MONONUCLEAR_CELL_MIGRATION					2	CXCL12,CXCL10	0.0363156	0.0651544
GO_BP	GO:2000117_NEGATIVE_REGULATION_OF_CYSTEINE_TYPE_ENDOPEPTIDASE_ACTIVITY					2	SFRP2,KLF4	0.0363156	0.0651544
GO_BP	GO:0042475_ODONTOGENESIS_OF_DENTIN_CONTAINING_TOOTH					2	PDGFRA,FAM20A	0.0363156	0.0651544
GO_BP	GO:0031341_REGULATION_OF_CELL_KILLING					2	F2RL1,CD55	0.0363156	0.0651544
GO_BP	GO:0062207_REGULATION_OF_PATTERN_RECOGNITION_RECEPTOR_SIGNALING_PATHWAY					2	F2RL1,CD14	0.0363156	0.0651544
GO_BP	GO:0032602_CHEMOKINE_PRODUCTION					2	F2RL1,KLF4	0.0353075	0.0640707
GO_BP	GO:0045921_POSITIVE_REGULATION_OF_EXOCYTOSIS					2	F2RL1,RAB27B	0.0353075	0.0640707
GO_BP	GO:0045778_POSITIVE_REGULATION_OF_OSSIFICATION					2	IGF1,SFRP2	0.0353075	0.0640707
GO_BP	GO:0032611_INTERLEUKIN_1_BETA_PRODUCTION					2	IGF1,F2RL1	0.0343143	0.0625066
GO_BP	GO:0033273_RESPONSE_TO_VITAMIN					2	CXCL10,KYNU	0.0343143	0.0625066
GO_BP	GO:0072511_DIVALENT_INORGANIC_CATION_TRANSPORT					7	CXCL11,CXCL12,CXCL10,CXCL9,HTR2B,CLIC2,CRACR2A	0.033549	0.0621113
GO_BP	GO:0003333_AMINO_ACID_TRANSMEMBRANE_TRANSPORT					2	PDPN,LRRC8D	0.0333358	0.061861
GO_BP	GO:0048562_EMBRYONIC_ORGAN_MORPHOGENESIS					5	MFAP5,FBN1,EFEMP1,PDGFRA,ALDH1A3	0.0330615	0.061448
GO_BP	GO:0046470_PHOSPHATIDYLCHOLINE_METABOLIC_PROCESS					2	PLA2G2A,CDS1	0.0323722	0.0602609
GO_BP	GO:0043506_REGULATION_OF_JUN_KINASE_ACTIVITY					2	SFRP2,DKK1	0.0323722	0.0602609
GO_BP	GO:0051781_POSITIVE_REGULATION_OF_CELL_DIVISION					2	VEGFD,HTR2B	0.0314234	0.0594247
GO_BP	GO:0001649_OSTEOBLAST_DIFFERENTIATION					4	IGF1,SFRP2,RRAS2,TWIST2	0.0308801	0.0584903
GO_BP	GO:0048477_OOGENESIS					2	IGF1,PAQR5	0.0304896	0.0580601
GO_BP	GO:0050772_POSITIVE_REGULATION_OF_AXONOGENESIS					2	CXCL12,PLXNC1	0.0304896	0.0580601
GO_BP	GO:0060627_REGULATION_OF_VESICLE_MEDIATED_TRANSPORT					8	F2RL1,STXBP6,CD14,RAB27B,DAB2,C3,IL15RA,DKK1	0.0299078	0.0575188
GO_BP	GO:0050886_ENDOCRINE_PROCESS					2	CPA3,F2RL1	0.0295707	0.0569625
GO_BP	GO:0032088_NEGATIVE_REGULATION_OF_NF_KAPPAB_TRANSCRIPTION_FACTOR_ACTIVITY					2	KLF4,PTGIS	0.0295707	0.0569625
GO_BP	GO:0070665_POSITIVE_REGULATION_OF_LEUKOCYTE_PROLIFERATION					3	IGF1,CD55,IL2RA	0.0293331	0.0565964
GO_BP	GO:0010212_RESPONSE_TO_IONIZING_RADIATION					3	SFRP2,CXCL10,THBD	0.0293331	0.0565964
GO_BP	GO:0055072_IRON_ION_HOMEOSTASIS					2	STEAP4,SCARA5	0.0286667	0.0560015
GO_BP	GO:0002718_REGULATION_OF_CYTOKINE_PRODUCTION_INVOLVED_IN_IMMUNE_RESPONSE					2	F2RL1,IL1R1	0.0286667	0.0560015
GO_BP	GO:0043502_REGULATION_OF_MUSCLE_ADAPTATION					2	IGF1,KLF4	0.0277778	0.0544793
GO_BP	GO:0030111_REGULATION_OF_WNT_SIGNALING_PATHWAY					6	SFRP2,ALPK2,DAB2,SMURF2,IGFBP6,DKK1	0.0269526	0.0535674
GO_BP	GO:2001021_NEGATIVE_REGULATION_OF_RESPONSE_TO_DNA_DAMAGE_STIMULUS					2	SFRP2,CXCL12	0.0269039	0.0535153
GO_BP	GO:0007186_G_PROTEIN_COUPLED_RECEPTOR_SIGNALING_PATHWAY					13	CXCL13,PDGFRL,CXCL11,CXCL12,CXCL10,F2RL1,CXCL9,CXCL1,HTR2B,P2RY13,ADGRG2,ADGRD1,C3	0.0259407	0.0516859
GO_BP	GO:0051701_INTERACTION_WITH_HOST					4	DPP4,MRC1,CR1,CD55	0.025886	0.0516201
GO_BP	GO:0009308_AMINE_METABOLIC_PROCESS					3	IDO1,KYNU,MOXD1	0.0256146	0.0514676
GO_BP	GO:0009612_RESPONSE_TO_MECHANICAL_STIMULUS					4	TTN,CXCL12,CXCL10,DCN	0.0254172	0.0512003
GO_BP	GO:0071383_CELLULAR_RESPONSE_TO_STEROID_HORMONE_STIMULUS					4	SERPINF1,DAB2,TRERF1,TFPI	0.0249539	0.050395
GO_BP	GO:0048732_GLAND_DEVELOPMENT					7	SEMA3C,SERPINF1,TGFBR3,WNT2,PDGFRA,NTN4,ALDH1A3	0.0249482	0.050395
GO_BP	GO:0002790_PEPTIDE_SECRETION					8	TTN,IGF1,F2RL1,DPP4,HTR2B,CD14,LRRC32,LTBP2	0.0244752	0.0495123
GO_BP	GO:0033555_MULTICELLULAR_ORGANISMAL_RESPONSE_TO_STRESS					2	DPP4,IDO1	0.0235586	0.0484825
GO_BP	GO:0051057_POSITIVE_REGULATION_OF_SMALL_GTPASE_MEDIATED_SIGNAL_TRANSDUCTION					2	IGF1,F2RL1	0.0235586	0.0484825
GO_BP	GO:0060411_CARDIAC_SEPTUM_MORPHOGENESIS					2	SEMA3C,TGFBR3	0.0227599	0.0469608
GO_BP	GO:2001057_REACTIVE_NITROGEN_SPECIES_METABOLIC_PROCESS					2	KLF4,PTGIS	0.0227599	0.0469608
GO_BP	GO:0007292_FEMALE_GAMETE_GENERATION					3	IGF1,TNFAIP6,PAQR5	0.0227455	0.0469608
GO_BP	GO:0002705_POSITIVE_REGULATION_OF_LEUKOCYTE_MEDIATED_IMMUNITY					3	F2RL1,IL1R1,C3	0.0227455	0.0469608
GO_BP	GO:0003002_REGIONALIZATION					6	SEMA3C,SFRP2,PCSK6,WNT2,C3,DKK1	0.0220153	0.0462264
GO_BP	GO:0008344_ADULT_LOCOMOTORY_BEHAVIOR					2	CXCL12,CHL1	0.0219763	0.0461852
GO_BP	GO:0031100_ANIMAL_ORGAN_REGENERATION					2	CXCL12,TGFBR3	0.0219763	0.0461852
GO_BP	GO:0030279_NEGATIVE_REGULATION_OF_OSSIFICATION					2	TWIST2,DKK1	0.0219763	0.0461852
GO_BP	GO:0030278_REGULATION_OF_OSSIFICATION					4	IGF1,SFRP2,TWIST2,DKK1	0.0214429	0.0453447
GO_BP	GO:0070374_POSITIVE_REGULATION_OF_ERK1_AND_ERK2_CASCADE					4	F2RL1,HTR2B,PDGFRA,PLA2G2A	0.0210282	0.044947
GO_BP	GO:1901292_NUCLEOSIDE_PHOSPHATE_CATABOLIC_PROCESS					2	NT5E,SMPDL3A	0.0204544	0.0439179
GO_BP	GO:0002709_REGULATION_OF_T_CELL_MEDIATED_IMMUNITY					2	IL1R1,IL20RB	0.019716	0.0428332
GO_BP	GO:0042246_TISSUE_REGENERATION					2	IGF1,NINJ2	0.0189928	0.0415674
GO_BP	GO:0035113_EMBRYONIC_APPENDAGE_MORPHOGENESIS					3	SFRP2,FRAS1,DKK1	0.0185812	0.0407417
GO_BP	GO:0010657_MUSCLE_CELL_APOPTOTIC_PROCESS					2	IGF1,SFRP2	0.0182845	0.0405773
GO_BP	GO:1903036_POSITIVE_REGULATION_OF_RESPONSE_TO_WOUNDING					2	PDPN,THBD	0.0182845	0.0405773
GO_BP	GO:0043900_REGULATION_OF_MULTI_ORGANISM_PROCESS					2	IGF1,SMURF2	0.0182845	0.0405773
GO_BP	GO:0045927_POSITIVE_REGULATION_OF_GROWTH					5	IGF1,SFRP2,CXCL12,TGFBR3,WNT2	0.0171537	0.0382065
GO_BP	GO:0045123_CELLULAR_EXTRAVASATION					2	CXCL12,IL1R1	0.0169131	0.0382065
GO_BP	GO:0034121_REGULATION_OF_TOLL_LIKE_RECEPTOR_SIGNALING_PATHWAY					2	F2RL1,CD14	0.0169131	0.0382065
GO_BP	GO:0002791_REGULATION_OF_PEPTIDE_SECRETION					7	TTN,IGF1,F2RL1,DPP4,HTR2B,CD14,LRRC32	0.0166521	0.0378733
GO_BP	GO:0150076_NEUROINFLAMMATORY_RESPONSE					2	IGF1,CTSC	0.0156016	0.0362157
GO_BP	GO:0045667_REGULATION_OF_OSTEOBLAST_DIFFERENTIATION					3	IGF1,SFRP2,TWIST2	0.0149278	0.0348168
GO_BP	GO:0048736_APPENDAGE_DEVELOPMENT					4	SEMA3C,SFRP2,FRAS1,DKK1	0.0144413	0.0340494
GO_BP	GO:0050715_POSITIVE_REGULATION_OF_CYTOKINE_SECRETION					2	HTR2B,CD14	0.0143498	0.0338672
GO_BP	GO:0032729_POSITIVE_REGULATION_OF_INTERFERON_GAMMA_PRODUCTION					2	CD14,IL1R1	0.0143498	0.0338672
GO_BP	GO:0043550_REGULATION_OF_LIPID_KINASE_ACTIVITY					2	PDGFRA,KLF4	0.0143498	0.0338672
GO_BP	GO:0090090_NEGATIVE_REGULATION_OF_CANONICAL_WNT_SIGNALING_PATHWAY					4	SFRP2,DAB2,IGFBP6,DKK1	0.0141225	0.0334636
GO_BP	GO:0030177_POSITIVE_REGULATION_OF_WNT_SIGNALING_PATHWAY					4	SFRP2,DAB2,SMURF2,DKK1	0.0141225	0.0334636
GO_BP	GO:0051099_POSITIVE_REGULATION_OF_BINDING					4	IGF1,EBF2,CLIC2,KLF4	0.0131947	0.0317072
GO_BP	GO:0008284_POSITIVE_REGULATION_OF_CELL_POPULATION_PROLIFERATION					13	VEGFD,IGF1,SFRP2,CXCL12,CXCL10,DPP4,HTR2B,TGFBR3,WNT2,CD248,PDGFRA,CD55,IL2RA	0.0131719	0.0316844
GO_BP	GO:0060761_NEGATIVE_REGULATION_OF_RESPONSE_TO_CYTOKINE_STIMULUS					2	F2RL1,KLF4	0.0131574	0.0316816
GO_BP	GO:0045669_POSITIVE_REGULATION_OF_OSTEOBLAST_DIFFERENTIATION					2	IGF1,SFRP2	0.0131574	0.0316816
GO_BP	GO:0022900_ELECTRON_TRANSPORT_CHAIN					4	STEAP4,IDO1,AOX1,CYB561	0.0128948	0.0311439
GO_BP	GO:0002548_MONOCYTE_CHEMOTAXIS					2	CXCL12,CXCL10	0.0125833	0.0304534
GO_BP	GO:0006915_APOPTOTIC_PROCESS					23	IGF1,SFRP2,CTSC,CXCL12,CXCL10,CHL1,ALPK2,PDPN,IDO1,HTR2B,CD14,DOCK8,DAB2,CD248,CARD6,IL2RA,KLF4,EPB41L3,TWIST2,PTGIS,ALDH1A3,DRAM1,DKK1	0.0121379	0.0297622
GO_BP	GO:0002263_CELL_ACTIVATION_INVOLVED_IN_IMMUNE_RESPONSE					11	CTSC,F2RL1,TNFAIP6,APBB1IP,CXCL1,CFD,CD14,CR1,CRACR2A,C3,CD55	0.0121187	0.0297622
GO_BP	GO:0031663_LIPOPOLYSACCHARIDE_MEDIATED_SIGNALING_PATHWAY					2	CD14,CD55	0.012024	0.029704
GO_BP	GO:0048639_POSITIVE_REGULATION_OF_DEVELOPMENTAL_GROWTH					4	IGF1,CXCL12,TGFBR3,WNT2	0.0117415	0.0290666
GO_BP	GO:0007568_AGING					6	CTSC,SERPINF1,KYNU,SERPING1,DCN,DKK1	0.0115918	0.0287258
GO_BP	GO:0090303_POSITIVE_REGULATION_OF_WOUND_HEALING					2	PDPN,THBD	0.0114792	0.0284766
GO_BP	GO:0002886_REGULATION_OF_MYELOID_LEUKOCYTE_MEDIATED_IMMUNITY					2	F2RL1,C3	0.0114792	0.0284766
GO_BP	GO:0031638_ZYMOGEN_ACTIVATION					2	CLEC3B,C1R	0.0114792	0.0284766
GO_BP	GO:0052126_MOVEMENT_IN_HOST_ENVIRONMENT					4	DPP4,MRC1,CR1,CD55	0.0114646	0.0284766
GO_BP	GO:1903039_POSITIVE_REGULATION_OF_LEUKOCYTE_CELL_CELL_ADHESION					5	IGF1,DPP4,DOCK8,CD55,IL2RA	0.010977	0.0278067
GO_BP	GO:0002819_REGULATION_OF_ADAPTIVE_IMMUNE_RESPONSE					4	IL1R1,CR1,IL20RB,C3	0.0109241	0.0278067
GO_BP	GO:0070588_CALCIUM_ION_TRANSMEMBRANE_TRANSPORT					6	CXCL11,CXCL10,CXCL9,HTR2B,CLIC2,CRACR2A	0.0108338	0.0277135
GO_BP	GO:0002526_ACUTE_INFLAMMATORY_RESPONSE					3	PTGES,IL20RB,C3	0.0107013	0.0274041
GO_BP	GO:0010594_REGULATION_OF_ENDOTHELIAL_CELL_MIGRATION					4	CXCL13,SERPINF1,KLF4,DCN	0.0106605	0.0273292
GO_BP	GO:0045428_REGULATION_OF_NITRIC_OXIDE_BIOSYNTHETIC_PROCESS					2	KLF4,PTGIS	0.0104335	0.0268048
GO_BP	GO:0006636_UNSATURATED_FATTY_ACID_BIOSYNTHETIC_PROCESS					2	PTGES,PTGIS	0.0104335	0.0268048
GO_BP	GO:0070371_ERK1_AND_ERK2_CASCADE					6	IGF1,F2RL1,HTR2B,PDGFRA,KLF4,PLA2G2A	0.00993784	0.0260376
GO_BP	GO:0051251_POSITIVE_REGULATION_OF_LYMPHOCYTE_ACTIVATION					6	IGHG1,IGF1,DPP4,DOCK8,CD55,IL2RA	0.00993784	0.0260376
GO_BP	GO:0019369_ARACHIDONIC_ACID_METABOLIC_PROCESS					2	PTGES,PTGIS	0.00993229	0.0260376
GO_BP	GO:0046456_ICOSANOID_BIOSYNTHETIC_PROCESS					2	PTGES,PTGIS	0.00993229	0.0260376
GO_BP	GO:0002712_REGULATION_OF_B_CELL_MEDIATED_IMMUNITY					2	CR1,C3	0.00993229	0.0260376
GO_BP	GO:0070228_REGULATION_OF_LYMPHOCYTE_APOPTOTIC_PROCESS					2	IDO1,DOCK8	0.00993229	0.0260376
GO_BP	GO:0001819_POSITIVE_REGULATION_OF_CYTOKINE_PRODUCTION					8	LUM,F2RL1,IDO1,HTR2B,CD14,IL1R1,IL20RB,C3	0.00975501	0.0257857
GO_BP	GO:0002367_CYTOKINE_PRODUCTION_INVOLVED_IN_IMMUNE_RESPONSE					3	F2RL1,IL1R1,CD55	0.00970159	0.0256731
GO_BP	GO:0002720_POSITIVE_REGULATION_OF_CYTOKINE_PRODUCTION_INVOLVED_IN_IMMUNE_RESPONSE					2	F2RL1,IL1R1	0.00944548	0.0250232
GO_BP	GO:0071825_PROTEIN_LIPID_COMPLEX_SUBUNIT_ORGANIZATION					2	PLTP,PLA2G2A	0.00944548	0.0250232
GO_BP	GO:0043030_REGULATION_OF_MACROPHAGE_ACTIVATION					2	CTSC,VSIG4	0.00944548	0.0250232
GO_BP	GO:0001906_CELL_KILLING					4	CTSC,F2RL1,C3,CD55	0.00940787	0.0250232
GO_BP	GO:0055086_NUCLEOBASE_CONTAINING_SMALL_MOLECULE_METABOLIC_PROCESS					10	IGF1,NT5E,IDO1,KYNU,UAP1,AOX1,UGDH,SMPDL3A,PTGIS,GFPT2	0.00923836	0.0246115
GO_BP	GO:0051047_POSITIVE_REGULATION_OF_SECRETION					7	TTN,IGF1,CXCL12,F2RL1,HTR2B,CD14,RAB27B	0.00919868	0.0245332
GO_BP	GO:0060548_NEGATIVE_REGULATION_OF_CELL_DEATH					14	IGF1,SFRP2,CXCL12,CHL1,SERPINF1,PDPN,IDO1,HTR2B,CCN5,DOCK8,DAB2,KLF4,TWIST2,DKK1	0.00919513	0.0245332
GO_BP	GO:0032623_INTERLEUKIN_2_PRODUCTION					2	VSIG4,IL20RB	0.00897294	0.0243087
GO_BP	GO:2000242_NEGATIVE_REGULATION_OF_REPRODUCTIVE_PROCESS					2	IGF1,SERPINF1	0.00897294	0.0243087
GO_BP	GO:0032757_POSITIVE_REGULATION_OF_INTERLEUKIN_8_PRODUCTION					2	F2RL1,CD14	0.00897294	0.0243087
GO_BP	GO:0006909_PHAGOCYTOSIS					6	IGHG1,FCGR3A,F2RL1,CD14,C3,IL15RA	0.00893572	0.0243087
GO_BP	GO:0002793_POSITIVE_REGULATION_OF_PEPTIDE_SECRETION					5	TTN,IGF1,F2RL1,HTR2B,CD14	0.00857241	0.0237137
GO_BP	GO:0002704_NEGATIVE_REGULATION_OF_LEUKOCYTE_MEDIATED_IMMUNITY					2	CR1,IL20RB	0.00851461	0.0235812
GO_BP	GO:0042102_POSITIVE_REGULATION_OF_T_CELL_PROLIFERATION					3	IGF1,CD55,IL2RA	0.00846607	0.0235015
GO_BP	GO:0051604_PROTEIN_MATURATION					6	CPA3,ADAMTS2,CLEC3B,PCSK6,C1R,CPZ	0.00846352	0.0235015
GO_BP	GO:0071675_REGULATION_OF_MONONUCLEAR_CELL_MIGRATION					2	CXCL12,CXCL10	0.00807039	0.0226121
GO_BP	GO:0035272_EXOCRINE_SYSTEM_DEVELOPMENT					2	SEMA3C,NTN4	0.00764017	0.0219516
GO_BP	GO:0072523_PURINE_CONTAINING_COMPOUND_CATABOLIC_PROCESS					2	NT5E,AOX1	0.00764017	0.0219516
GO_BP	GO:0003044_REGULATION_OF_SYSTEMIC_ARTERIAL_BLOOD_PRESSURE_MEDIATED_BY_A_CHEMICAL_SIGNAL					2	CPA3,F2RL1	0.00764017	0.0219516
GO_BP	GO:0046620_REGULATION_OF_ORGAN_GROWTH					3	IGF1,TGFBR3,WNT2	0.00761046	0.0219516
GO_BP	GO:0035567_NON_CANONICAL_WNT_SIGNALING_PATHWAY					4	SFRP2,DAB2,SMURF2,DKK1	0.00741572	0.0214362
GO_BP	GO:0009952_ANTERIOR_POSTERIOR_PATTERN_SPECIFICATION					5	SEMA3C,SFRP2,PCSK6,WNT2,DKK1	0.00735889	0.0213237
GO_BP	GO:0043542_ENDOTHELIAL_CELL_MIGRATION					5	CXCL13,DPP4,SERPINF1,KLF4,DCN	0.00735889	0.0213237
GO_BP	GO:0048546_DIGESTIVE_TRACT_MORPHOGENESIS					2	SFRP2,PDGFRA	0.00722387	0.0210093
GO_BP	GO:0002706_REGULATION_OF_LYMPHOCYTE_MEDIATED_IMMUNITY					4	IL1R1,CR1,IL20RB,C3	0.00721431	0.0210072
GO_BP	GO:0030178_NEGATIVE_REGULATION_OF_WNT_SIGNALING_PATHWAY					5	SFRP2,ALPK2,DAB2,IGFBP6,DKK1	0.00719629	0.0209914
GO_BP	GO:0051651_MAINTENANCE_OF_LOCATION_IN_CELL					5	CXCL11,CXCL10,CXCL9,HTR2B,CLIC2	0.00687892	0.0206108
GO_BP	GO:0035107_APPENDAGE_MORPHOGENESIS					4	SEMA3C,SFRP2,FRAS1,DKK1	0.00682303	0.0204691
GO_BP	GO:0001935_ENDOTHELIAL_CELL_PROLIFERATION					4	VEGFD,CXCL12,HTR2B,WNT2	0.00682303	0.0204691
GO_BP	GO:0010171_BODY_MORPHOGENESIS					2	PDGFRA,DKK1	0.00682136	0.0204691
GO_BP	GO:0002820_NEGATIVE_REGULATION_OF_ADAPTIVE_IMMUNE_RESPONSE					2	CR1,IL20RB	0.00682136	0.0204691
GO_BP	GO:0010718_POSITIVE_REGULATION_OF_EPITHELIAL_TO_MESENCHYMAL_TRANSITION					2	PDPN,DAB2	0.00682136	0.0204691
GO_BP	GO:1903727_POSITIVE_REGULATION_OF_PHOSPHOLIPID_METABOLIC_PROCESS					2	HTR2B,PDGFRA	0.00682136	0.0204691
GO_BP	GO:0006873_CELLULAR_ION_HOMEOSTASIS					11	CXCL13,CXCL11,CXCL12,CXCL10,F2RL1,CXCL9,SCARA5,HTR2B,CLIC2,PDGFRA,CD55	0.00670148	0.0202835
GO_BP	GO:0044409_ENTRY_INTO_HOST					4	DPP4,MRC1,CR1,CD55	0.00663308	0.020102
GO_BP	GO:0002703_REGULATION_OF_LEUKOCYTE_MEDIATED_IMMUNITY					5	F2RL1,IL1R1,CR1,IL20RB,C3	0.00657183	0.0199418
GO_BP	GO:0050764_REGULATION_OF_PHAGOCYTOSIS					3	F2RL1,C3,IL15RA	0.00656115	0.0199349
GO_BP	GO:0042551_NEURON_MATURATION					2	C3,NTN4	0.00643255	0.0195942
GO_BP	GO:0006692_PROSTANOID_METABOLIC_PROCESS					2	PTGES,PTGIS	0.00643255	0.0195942
GO_BP	GO:0060419_HEART_GROWTH					3	IGF1,TGFBR3,WNT2	0.00631474	0.0193914
GO_BP	GO:0001738_MORPHOGENESIS_OF_A_POLARIZED_EPITHELIUM					4	SFRP2,DAB2,SMURF2,DKK1	0.00626436	0.0193914
GO_BP	GO:0050729_POSITIVE_REGULATION_OF_INFLAMMATORY_RESPONSE					4	CTSC,IDO1,C3,PLA2G2A	0.00626436	0.0193914
GO_BP	GO:0060541_RESPIRATORY_SYSTEM_DEVELOPMENT					5	PDPN,ADAMTS2,WNT2,PDGFRA,ALDH1A3	0.00613006	0.0193914
GO_BP	GO:0002673_REGULATION_OF_ACUTE_INFLAMMATORY_RESPONSE					2	IL20RB,C3	0.00605731	0.0192909
GO_BP	GO:0030100_REGULATION_OF_ENDOCYTOSIS					5	F2RL1,CD14,DAB2,C3,DKK1	0.00584785	0.0186488
GO_BP	GO:1903725_REGULATION_OF_PHOSPHOLIPID_METABOLIC_PROCESS					3	HTR2B,PDGFRA,KLF4	0.00584052	0.0186488
GO_BP	GO:0070303_NEGATIVE_REGULATION_OF_STRESS_ACTIVATED_PROTEIN_KINASE_SIGNALING_CASCADE					2	SFRP2,F2RL1	0.00569551	0.0182364
GO_BP	GO:0050654_CHONDROITIN_SULFATE_PROTEOGLYCAN_METABOLIC_PROCESS					2	UGDH,DCN	0.00534704	0.0177396
GO_BP	GO:0050982_DETECTION_OF_MECHANICAL_STIMULUS					2	TTN,CXCL12	0.00534704	0.0177396
GO_BP	GO:0061053_SOMITE_DEVELOPMENT					3	SEMA3C,SFRP2,DKK1	0.00517469	0.0172417
GO_BP	GO:0009101_GLYCOPROTEIN_BIOSYNTHETIC_PROCESS					7	IGF1,HS6ST2,TMTC1,GALNT12,UGDH,DCN,GFPT2	0.00501691	0.0167629
GO_BP	GO:0061756_LEUKOCYTE_ADHESION_TO_VASCULAR_ENDOTHELIAL_CELL					2	CXCL12,KLF4	0.00501175	0.0167629
GO_BP	GO:0002369_T_CELL_CYTOKINE_PRODUCTION					2	IL1R1,CD55	0.00501175	0.0167629
GO_BP	GO:0014896_MUSCLE_HYPERTROPHY					3	TTN,IGF1,HTR2B	0.0049646	0.0167055
GO_BP	GO:0007626_LOCOMOTORY_BEHAVIOR					5	CXCL12,CHL1,DPP4,IDO1,ALDH1A3	0.00493456	0.0166279
GO_BP	GO:0009582_DETECTION_OF_ABIOTIC_STIMULUS					4	TTN,CXCL12,LXN,CDS1	0.00493295	0.0166279
GO_BP	GO:0060070_CANONICAL_WNT_SIGNALING_PATHWAY					7	SFRP2,WNT2,DAB2,SMURF2,KLF4,IGFBP6,DKK1	0.00492663	0.0166279
GO_BP	GO:0009100_GLYCOPROTEIN_METABOLIC_PROCESS					8	IGF1,HS6ST2,TMTC1,PCSK6,GALNT12,UGDH,DCN,GFPT2	0.00481905	0.0163312
GO_BP	GO:2000106_REGULATION_OF_LEUKOCYTE_APOPTOTIC_PROCESS					3	CXCL12,IDO1,DOCK8	0.00476031	0.0161783
GO_BP	GO:0002444_MYELOID_LEUKOCYTE_MEDIATED_IMMUNITY					10	CTSC,F2RL1,TNFAIP6,CXCL1,CFD,CD14,CR1,CRACR2A,C3,CD55	0.00473224	0.0161783
GO_BP	GO:0002707_NEGATIVE_REGULATION_OF_LYMPHOCYTE_MEDIATED_IMMUNITY					2	CR1,IL20RB	0.0046895	0.0161783
GO_BP	GO:0050673_EPITHELIAL_CELL_PROLIFERATION					8	VEGFD,IGF1,SFRP2,CXCL12,SERPINF1,HTR2B,TGFBR3,WNT2	0.00466416	0.0161783
GO_BP	GO:0030162_REGULATION_OF_PROTEOLYSIS					12	SFRP2,CTSC,SERPINF1,LXN,CLEC3B,CR1,RARRES1,SERPING1,DAB2,TFPI,C3,KLF4	0.00458522	0.0161365
GO_BP	GO:0110110_POSITIVE_REGULATION_OF_ANIMAL_ORGAN_MORPHOGENESIS					3	SEMA3C,WNT2,DKK1	0.00456175	0.0160776
GO_BP	GO:0050679_POSITIVE_REGULATION_OF_EPITHELIAL_CELL_PROLIFERATION					5	VEGFD,IGF1,CXCL12,HTR2B,WNT2	0.00446239	0.0157742
GO_BP	GO:0006040_AMINO_SUGAR_METABOLIC_PROCESS					2	UAP1,GFPT2	0.00438014	0.0155065
GO_BP	GO:0001709_CELL_FATE_DETERMINATION					2	EBF2,KLF4	0.00438014	0.0155065
GO_BP	GO:1903053_REGULATION_OF_EXTRACELLULAR_MATRIX_ORGANIZATION					2	DPP4,PDPN	0.00438014	0.0155065
GO_BP	GO:1902622_REGULATION_OF_NEUTROPHIL_MIGRATION					2	DPP4,IL1R1	0.00438014	0.0155065
GO_BP	GO:0010324_MEMBRANE_INVAGINATION					3	IGHG1,F2RL1,C3	0.00436885	0.0155065
GO_BP	GO:0010941_REGULATION_OF_CELL_DEATH					22	IGF1,SFRP2,CTSC,CXCL12,CXCL10,CHL1,ALPK2,SERPINF1,PDPN,IDO1,HTR2B,CCN5,DOCK8,RRAS2,DAB2,CD248,CARD6,KLF4,TWIST2,PTGIS,ALDH1A3,DKK1	0.00432189	0.0154613
GO_BP	GO:0042742_DEFENSE_RESPONSE_TO_BACTERIUM					6	IGHG1,JCHAIN,CXCL13,F2RL1,ADAMTS5,PLA2G2A	0.00421821	0.0151359
GO_BP	GO:0022617_EXTRACELLULAR_MATRIX_DISASSEMBLY					3	DPP4,PDPN,ADAMTS5	0.00418152	0.015027
GO_BP	GO:0048144_FIBROBLAST_PROLIFERATION					3	IGF1,WNT2,PDGFRA	0.00418152	0.015027
GO_BP	GO:0032637_INTERLEUKIN_8_PRODUCTION					3	F2RL1,CD14,KLF4	0.00418152	0.015027
GO_BP	GO:0009072_AROMATIC_AMINO_ACID_FAMILY_METABOLIC_PROCESS					2	IDO1,KYNU	0.00408353	0.014764
GO_BP	GO:0001990_REGULATION_OF_SYSTEMIC_ARTERIAL_BLOOD_PRESSURE_BY_HORMONE					2	CPA3,F2RL1	0.00408353	0.014764
GO_BP	GO:1904018_POSITIVE_REGULATION_OF_VASCULATURE_DEVELOPMENT					5	VEGFD,SFRP2,C3,KLF4,PTGIS	0.00392014	0.0147126
GO_BP	GO:2000826_REGULATION_OF_HEART_MORPHOGENESIS					2	SEMA3C,DKK1	0.00379949	0.0143933
GO_BP	GO:1902229_REGULATION_OF_INTRINSIC_APOPTOTIC_SIGNALING_PATHWAY_IN_RESPONSE_TO_DNA_DAMAGE					2	SFRP2,CXCL12	0.00379949	0.0143933
GO_BP	GO:0007431_SALIVARY_GLAND_DEVELOPMENT					2	SEMA3C,NTN4	0.00379949	0.0143933
GO_BP	GO:0051924_REGULATION_OF_CALCIUM_ION_TRANSPORT					6	CXCL11,CXCL12,CXCL10,CXCL9,CLIC2,CRACR2A	0.00361294	0.0137743
GO_BP	GO:0034122_NEGATIVE_REGULATION_OF_TOLL_LIKE_RECEPTOR_SIGNALING_PATHWAY					2	F2RL1,CD14	0.00352787	0.0134716
GO_BP	GO:0001816_CYTOKINE_PRODUCTION					13	IGF1,LUM,F2RL1,IDO1,HTR2B,VSIG4,CD14,IL1R1,LRRC32,IL20RB,C3,CD55,KLF4	0.00336575	0.0129805
GO_BP	GO:0019221_CYTOKINE_MEDIATED_SIGNALING_PATHWAY					13	IGHG1,CXCL13,CXCL11,CXCL12,CXCL10,F2RL1,CXCL9,F13A1,CXCL1,IL1R1,IL20RB,IL15RA,IL2RA	0.00328759	0.0129805
GO_BP	GO:0030212_HYALURONAN_METABOLIC_PROCESS					2	LYVE1,HAS1	0.0032685	0.0129805
GO_BP	GO:0046329_NEGATIVE_REGULATION_OF_JNK_CASCADE					2	SFRP2,F2RL1	0.0032685	0.0129805
GO_BP	GO:0040019_POSITIVE_REGULATION_OF_EMBRYONIC_DEVELOPMENT					2	IGF1,WNT2	0.0032685	0.0129805
GO_BP	GO:0071604_TRANSFORMING_GROWTH_FACTOR_BETA_PRODUCTION					2	LUM,LRRC32	0.0032685	0.0129805
GO_BP	GO:0007164_ESTABLISHMENT_OF_TISSUE_POLARITY					4	SFRP2,DAB2,SMURF2,DKK1	0.00321783	0.0129805
GO_BP	GO:0003156_REGULATION_OF_ANIMAL_ORGAN_FORMATION					2	WNT2,DKK1	0.00302118	0.0122652
GO_BP	GO:0045730_RESPIRATORY_BURST					2	JCHAIN,CD55	0.00302118	0.0122652
GO_BP	GO:0034142_TOLL_LIKE_RECEPTOR_4_SIGNALING_PATHWAY					2	F2RL1,CD14	0.00302118	0.0122652
GO_BP	GO:0031128_DEVELOPMENTAL_INDUCTION					2	WNT2,DKK1	0.00278574	0.0114315
GO_BP	GO:0060323_HEAD_MORPHOGENESIS					2	PDGFRA,DKK1	0.00278574	0.0114315
GO_BP	GO:0048009_INSULIN_LIKE_GROWTH_FACTOR_RECEPTOR_SIGNALING_PATHWAY					2	IGF1,IGFBP6	0.00278574	0.0114315
GO_BP	GO:0010092_SPECIFICATION_OF_ANIMAL_ORGAN_IDENTITY					2	WNT2,DKK1	0.00278574	0.0114315
GO_BP	GO:0051346_NEGATIVE_REGULATION_OF_HYDROLASE_ACTIVITY					9	SFRP2,SERPINF1,LXN,CR1,RARRES1,SERPING1,TFPI,C3,KLF4	0.00277896	0.0114315
GO_BP	GO:0060401_CYTOSOLIC_CALCIUM_ION_TRANSPORT					5	CXCL11,CXCL10,CXCL9,HTR2B,CLIC2	0.00273911	0.0114315
GO_BP	GO:0070227_LYMPHOCYTE_APOPTOTIC_PROCESS					3	IDO1,DOCK8,IL2RA	0.00273395	0.0114315
GO_BP	GO:0002888_POSITIVE_REGULATION_OF_MYELOID_LEUKOCYTE_MEDIATED_IMMUNITY					2	F2RL1,C3	0.00256198	0.0111019
GO_BP	GO:0045066_REGULATORY_T_CELL_DIFFERENTIATION					2	CR1,IL2RA	0.00256198	0.0111019
GO_BP	GO:0052547_REGULATION_OF_PEPTIDASE_ACTIVITY					9	SFRP2,SERPINF1,LXN,CR1,RARRES1,SERPING1,TFPI,C3,KLF4	0.00247275	0.0107741
GO_BP	GO:0032103_POSITIVE_REGULATION_OF_RESPONSE_TO_EXTERNAL_STIMULUS					10	VEGFD,CXCL13,CTSC,CXCL12,CXCL10,F2RL1,IDO1,THBD,C3,PLA2G2A	0.00247021	0.0107741
GO_BP	GO:0018149_PEPTIDE_CROSS_LINKING					2	F13A1,DCN	0.0023497	0.0102945
GO_BP	GO:0002691_REGULATION_OF_CELLULAR_EXTRAVASATION					2	CXCL12,IL1R1	0.0023497	0.0102945
GO_BP	GO:0070232_REGULATION_OF_T_CELL_APOPTOTIC_PROCESS					2	IDO1,DOCK8	0.0023497	0.0102945
GO_BP	GO:0050663_CYTOKINE_SECRETION					4	F2RL1,HTR2B,CD14,LRRC32	0.00231596	0.0102031
GO_BP	GO:0001756_SOMITOGENESIS					3	SEMA3C,SFRP2,DKK1	0.00221857	0.00991153
GO_BP	GO:0002274_MYELOID_LEUKOCYTE_ACTIVATION					12	CTSC,F2RL1,TNFAIP6,CXCL1,CFD,VSIG4,CD14,CR1,CRACR2A,C3,CD55,PLA2G2A	0.0021775	0.00991153
GO_BP	GO:0060317_CARDIAC_EPITHELIAL_TO_MESENCHYMAL_TRANSITION					2	TGFBR3,WNT2	0.0021487	0.00991153
GO_BP	GO:0030201_HEPARAN_SULFATE_PROTEOGLYCAN_METABOLIC_PROCESS					2	HS6ST2,UGDH	0.0021487	0.00991153
GO_BP	GO:0034367_PROTEIN_CONTAINING_COMPLEX_REMODELING					2	PLTP,PLA2G2A	0.0021487	0.00991153
GO_BP	GO:0010165_RESPONSE_TO_X_RAY					2	SFRP2,THBD	0.0021487	0.00991153
GO_BP	GO:0042698_OVULATION_CYCLE					3	SERPINF1,HAS1,PDGFRA	0.00210107	0.00991153
GO_BP	GO:0016485_PROTEIN_PROCESSING					6	CPA3,ADAMTS2,CLEC3B,PCSK6,C1R,CPZ	0.00197453	0.0094706
GO_BP	GO:0050650_CHONDROITIN_SULFATE_PROTEOGLYCAN_BIOSYNTHETIC_PROCESS					2	UGDH,DCN	0.00195875	0.00943295
GO_BP	GO:1902230_NEGATIVE_REGULATION_OF_INTRINSIC_APOPTOTIC_SIGNALING_PATHWAY_IN_RESPONSE_TO_DNA_DAMAGE					2	SFRP2,CXCL12	0.00195875	0.00943295
GO_BP	GO:0070229_NEGATIVE_REGULATION_OF_LYMPHOCYTE_APOPTOTIC_PROCESS					2	IDO1,DOCK8	0.00195875	0.00943295
GO_BP	GO:0150077_REGULATION_OF_NEUROINFLAMMATORY_RESPONSE					2	IGF1,CTSC	0.00195875	0.00943295
GO_BP	GO:0050766_POSITIVE_REGULATION_OF_PHAGOCYTOSIS					3	F2RL1,C3,IL15RA	0.0018791	0.00914186
GO_BP	GO:0032609_INTERFERON_GAMMA_PRODUCTION					4	F2RL1,CD14,IL1R1,IL20RB	0.00182751	0.00896419
GO_BP	GO:0009408_RESPONSE_TO_HEAT					5	IGF1,CXCL12,CXCL10,SCARA5,CD14	0.00178955	0.00881437
GO_BP	GO:0061311_CELL_SURFACE_RECEPTOR_SIGNALING_PATHWAY_INVOLVED_IN_HEART_DEVELOPMENT					2	ALPK2,DKK1	0.00177965	0.00879231
GO_BP	GO:0010453_REGULATION_OF_CELL_FATE_COMMITMENT					2	SFRP2,DKK1	0.00177965	0.00879231
GO_BP	GO:0050817_COAGULATION					8	F2RL1,PDPN,F13A1,DOCK8,SERPING1,TFPI,THBD,PDGFRA	0.00171508	0.00870452
GO_BP	GO:0071887_LEUKOCYTE_APOPTOTIC_PROCESS					4	CXCL12,IDO1,DOCK8,IL2RA	0.00168291	0.00870452
GO_BP	GO:0022409_POSITIVE_REGULATION_OF_CELL_CELL_ADHESION					7	IGF1,CXCL13,DPP4,PDPN,DOCK8,CD55,IL2RA	0.00166302	0.00870452
GO_BP	GO:0050820_POSITIVE_REGULATION_OF_COAGULATION					2	PDPN,THBD	0.00161114	0.00861328
GO_BP	GO:0060142_REGULATION_OF_SYNCYTIUM_FORMATION_BY_PLASMA_MEMBRANE_FUSION					2	CXCL10,CXCL9	0.00161114	0.00861328
GO_BP	GO:0044283_SMALL_MOLECULE_BIOSYNTHETIC_PROCESS					13	NT5E,IDO1,PTGES,KYNU,HAS1,PLTP,MOXD1,UGDH,DCN,SMPDL3A,HSD3B7,PTGIS,ALDH1A3	0.00156834	0.00849904
GO_BP	GO:0048592_EYE_MORPHOGENESIS					5	MFAP5,WNT2,FBN1,EFEMP1,ALDH1A3	0.00151985	0.00827395
GO_BP	GO:0009074_AROMATIC_AMINO_ACID_FAMILY_CATABOLIC_PROCESS					2	IDO1,KYNU	0.00145301	0.00792824
GO_BP	GO:0050710_NEGATIVE_REGULATION_OF_CYTOKINE_SECRETION					2	F2RL1,LRRC32	0.00145301	0.00792824
GO_BP	GO:0046457_PROSTANOID_BIOSYNTHETIC_PROCESS					2	PTGES,PTGIS	0.00145301	0.00792824
GO_BP	GO:0001818_NEGATIVE_REGULATION_OF_CYTOKINE_PRODUCTION					7	IGF1,F2RL1,IDO1,VSIG4,LRRC32,IL20RB,KLF4	0.00144503	0.00792824
GO_BP	GO:0046649_LYMPHOCYTE_ACTIVATION					13	IGHG1,IGF1,F2RL1,DPP4,APBB1IP,IDO1,VSIG4,LRRC32,CR1,DOCK8,IL20RB,CD55,IL2RA	0.00140804	0.00775397
GO_BP	GO:0002456_T_CELL_MEDIATED_IMMUNITY					4	CTSC,IL1R1,IL20RB,CD55	0.00135829	0.00749738
GO_BP	GO:0045824_NEGATIVE_REGULATION_OF_INNATE_IMMUNE_RESPONSE					3	VSIG4,CR1,SERPING1	0.0013112	0.00734515
GO_BP	GO:1904994_REGULATION_OF_LEUKOCYTE_ADHESION_TO_VASCULAR_ENDOTHELIAL_CELL					2	CXCL12,KLF4	0.001305	0.00734515
GO_BP	GO:0051250_NEGATIVE_REGULATION_OF_LYMPHOCYTE_ACTIVATION					5	IDO1,VSIG4,LRRC32,IL20RB,IL2RA	0.0012384	0.00734515
GO_BP	GO:0035924_CELLULAR_RESPONSE_TO_VASCULAR_ENDOTHELIAL_GROWTH_FACTOR_STIMULUS					3	VEGFD,PDGFRA,DCN	0.00122993	0.00734515
GO_BP	GO:0035282_SEGMENTATION					4	SEMA3C,SFRP2,PCSK6,DKK1	0.00118721	0.00722349
GO_BP	GO:0030206_CHONDROITIN_SULFATE_BIOSYNTHETIC_PROCESS					2	UGDH,DCN	0.00116686	0.00713615
GO_BP	GO:0035640_EXPLORATION_BEHAVIOR					2	CHL1,DPP4	0.00116686	0.00713615
GO_BP	GO:0042730_FIBRINOLYSIS					2	SERPING1,THBD	0.00116686	0.00713615
GO_BP	GO:0015012_HEPARAN_SULFATE_PROTEOGLYCAN_BIOSYNTHETIC_PROCESS					2	HS6ST2,UGDH	0.00116686	0.00713615
GO_BP	GO:0002861_REGULATION_OF_INFLAMMATORY_RESPONSE_TO_ANTIGENIC_STIMULUS					2	IL20RB,C3	0.00116686	0.00713615
GO_BP	GO:0090025_REGULATION_OF_MONOCYTE_CHEMOTAXIS					2	CXCL12,CXCL10	0.00116686	0.00713615
GO_BP	GO:0003081_REGULATION_OF_SYSTEMIC_ARTERIAL_BLOOD_PRESSURE_BY_RENIN_ANGIOTENSIN					2	CPA3,F2RL1	0.00116686	0.00713615
GO_BP	GO:0002507_TOLERANCE_INDUCTION					2	IDO1,IL2RA	0.00116686	0.00713615
GO_BP	GO:1903169_REGULATION_OF_CALCIUM_ION_TRANSMEMBRANE_TRANSPORT					5	CXCL11,CXCL10,CXCL9,CLIC2,CRACR2A	0.00115408	0.00713615
GO_BP	GO:0002437_INFLAMMATORY_RESPONSE_TO_ANTIGENIC_STIMULUS					3	IL20RB,C3,IL2RA	0.00115226	0.00713615
GO_BP	GO:0032613_INTERLEUKIN_10_PRODUCTION					3	F2RL1,IDO1,IL20RB	0.00115226	0.00713615
GO_BP	GO:0006508_PROTEOLYSIS					25	CPA3,SFRP2,CTSC,DPP4,SERPINF1,LXN,CFD,ADAMTS2,CLEC3B,CR1,PCSK6,XPNPEP2,C1R,ADAMTS5,RARRES1,SERPING1,DAB2,SMURF2,C1S,TFPI,CPZ,C3,CFB,KLF4,HTRA3	0.00109783	0.00700198
GO_BP	GO:0010522_REGULATION_OF_CALCIUM_ION_TRANSPORT_INTO_CYTOSOL					4	CXCL11,CXCL10,CXCL9,CLIC2	0.00108239	0.00692208
GO_BP	GO:0006576_CELLULAR_BIOGENIC_AMINE_METABOLIC_PROCESS					3	IDO1,KYNU,MOXD1	0.00107809	0.00691315
GO_BP	GO:0042537_BENZENE_CONTAINING_COMPOUND_METABOLIC_PROCESS					2	IDO1,KYNU	0.00103833	0.00667619
GO_BP	GO:0045992_NEGATIVE_REGULATION_OF_EMBRYONIC_DEVELOPMENT					2	SFRP2,DKK1	0.00103833	0.00667619
GO_BP	GO:0042104_POSITIVE_REGULATION_OF_ACTIVATED_T_CELL_PROLIFERATION					2	IGF1,IL2RA	0.00103833	0.00667619
GO_BP	GO:0071677_POSITIVE_REGULATION_OF_MONONUCLEAR_CELL_MIGRATION					2	CXCL12,CXCL10	0.00103833	0.00667619
GO_BP	GO:1901623_REGULATION_OF_LYMPHOCYTE_CHEMOTAXIS					2	CXCL13,CXCL10	0.00103833	0.00667619
GO_BP	GO:0007189_ADENYLATE_CYCLASE_ACTIVATING_G_PROTEIN_COUPLED_RECEPTOR_SIGNALING_PATHWAY					5	CXCL11,CXCL10,CXCL9,ADGRG2,ADGRD1	0.00103594	0.00667619
GO_BP	GO:0050921_POSITIVE_REGULATION_OF_CHEMOTAXIS					5	VEGFD,CXCL13,CXCL12,CXCL10,F2RL1	0.00103594	0.00667619
GO_BP	GO:0002832_NEGATIVE_REGULATION_OF_RESPONSE_TO_BIOTIC_STIMULUS					4	VSIG4,CR1,SERPING1,IL2RA	0.000984599	0.00650656
GO_BP	GO:0001938_POSITIVE_REGULATION_OF_ENDOTHELIAL_CELL_PROLIFERATION					4	VEGFD,CXCL12,HTR2B,WNT2	0.000984599	0.00650656
GO_BP	GO:2000027_REGULATION_OF_ANIMAL_ORGAN_MORPHOGENESIS					7	SEMA3C,SFRP2,WNT2,DAB2,SMURF2,NTN4,DKK1	0.000972922	0.00646531
GO_BP	GO:0062149_DETECTION_OF_STIMULUS_INVOLVED_IN_SENSORY_PERCEPTION_OF_PAIN					2	CXCL12,LXN	0.00091914	0.00632343
GO_BP	GO:0042430_INDOLE_CONTAINING_COMPOUND_METABOLIC_PROCESS					2	IDO1,KYNU	0.00091914	0.00632343
GO_BP	GO:2000679_POSITIVE_REGULATION_OF_TRANSCRIPTION_REGULATORY_REGION_DNA_BINDING					2	IGF1,KLF4	0.00091914	0.00632343
GO_BP	GO:0010524_POSITIVE_REGULATION_OF_CALCIUM_ION_TRANSPORT_INTO_CYTOSOL					3	CXCL11,CXCL10,CXCL9	0.00087573	0.00632343
GO_BP	GO:0048017_INOSITOL_LIPID_MEDIATED_SIGNALING					6	IGF1,F2RL1,HTR2B,PDGFRA,KLF4,DCN	0.000815916	0.00610398
GO_BP	GO:0002438_ACUTE_INFLAMMATORY_RESPONSE_TO_ANTIGENIC_STIMULUS					2	IL20RB,C3	0.000809009	0.0060714
GO_BP	GO:0009310_AMINE_CATABOLIC_PROCESS					2	IDO1,KYNU	0.000809009	0.0060714
GO_BP	GO:0060445_BRANCHING_INVOLVED_IN_SALIVARY_GLAND_MORPHOGENESIS					2	SEMA3C,NTN4	0.000809009	0.0060714
GO_BP	GO:0035743_CD4_POSITIVE_ALPHA_BETA_T_CELL_CYTOKINE_PRODUCTION					2	IL1R1,CD55	0.000809009	0.0060714
GO_BP	GO:0033622_INTEGRIN_ACTIVATION					2	CXCL13,CXCL12	0.000809009	0.0060714
GO_BP	GO:0001759_ORGAN_INDUCTION					2	WNT2,DKK1	0.000809009	0.0060714
GO_BP	GO:0043567_REGULATION_OF_INSULIN_LIKE_GROWTH_FACTOR_RECEPTOR_SIGNALING_PATHWAY					2	IGF1,IGFBP6	0.000809009	0.0060714
GO_BP	GO:0062009_SECONDARY_PALATE_DEVELOPMENT					2	LRRC32,TGFBR3	0.000809009	0.0060714
GO_BP	GO:0050951_SENSORY_PERCEPTION_OF_TEMPERATURE_STIMULUS					2	CXCL12,LXN	0.000809009	0.0060714
GO_BP	GO:0097553_CALCIUM_ION_TRANSMEMBRANE_IMPORT_INTO_CYTOSOL					5	CXCL11,CXCL10,CXCL9,HTR2B,CLIC2	0.000796396	0.0060714
GO_BP	GO:0060021_ROOF_OF_MOUTH_DEVELOPMENT					4	LRRC32,TGFBR3,FRAS1,PDGFRA	0.000768877	0.00597764
GO_BP	GO:0016048_DETECTION_OF_TEMPERATURE_STIMULUS					2	CXCL12,LXN	0.000707653	0.00555613
GO_BP	GO:0032703_NEGATIVE_REGULATION_OF_INTERLEUKIN_2_PRODUCTION					2	VSIG4,IL20RB	0.000707653	0.00555613
GO_BP	GO:1901739_REGULATION_OF_MYOBLAST_FUSION					2	CXCL10,CXCL9	0.000707653	0.00555613
GO_BP	GO:0050873_BROWN_FAT_CELL_DIFFERENTIATION					3	EBF2,DIO2,METRNL	0.000701742	0.00555613
GO_BP	GO:0048146_POSITIVE_REGULATION_OF_FIBROBLAST_PROLIFERATION					3	IGF1,WNT2,PDGFRA	0.000701742	0.00555613
GO_BP	GO:0014068_POSITIVE_REGULATION_OF_PHOSPHATIDYLINOSITOL_3_KINASE_SIGNALING					4	IGF1,F2RL1,PDGFRA,DCN	0.000693319	0.00553492
GO_BP	GO:0072507_DIVALENT_INORGANIC_CATION_HOMEOSTASIS					11	CXCL13,CXCL11,CXCL12,CXCL10,F2RL1,CXCL9,HTR2B,CLIC2,PDGFRA,CD55,FAM20A	0.000665405	0.00534797
GO_BP	GO:2000107_NEGATIVE_REGULATION_OF_LEUKOCYTE_APOPTOTIC_PROCESS					3	CXCL12,IDO1,DOCK8	0.000649642	0.00523898
GO_BP	GO:0055065_METAL_ION_HOMEOSTASIS					13	STEAP4,CXCL13,CXCL11,CXCL12,CXCL10,F2RL1,CXCL9,SCARA5,HTR2B,CLIC2,PDGFRA,CD55,FAM20A	0.000635441	0.00516379
GO_BP	GO:0033630_POSITIVE_REGULATION_OF_CELL_ADHESION_MEDIATED_BY_INTEGRIN					2	CXCL13,SFRP2	0.000614776	0.00516379
GO_BP	GO:0070231_T_CELL_APOPTOTIC_PROCESS					3	IDO1,DOCK8,IL2RA	0.000600343	0.00516379
GO_BP	GO:0045087_INNATE_IMMUNE_RESPONSE					16	IGHG1,JCHAIN,F2RL1,MRC1,C1QB,CFD,VSIG4,CD14,KYNU,CR1,C1R,SERPING1,C1S,C3,CFB,CD55	0.000573342	0.00510854
GO_BP	GO:0050867_POSITIVE_REGULATION_OF_CELL_ACTIVATION					9	IGHG1,IGF1,CTSC,F2RL1,DPP4,PDPN,DOCK8,CD55,IL2RA	0.00057105	0.00510724
GO_BP	GO:0060324_FACE_DEVELOPMENT					3	PDGFRA,ALDH1A3,DKK1	0.000553759	0.00497129
GO_BP	GO:0033628_REGULATION_OF_CELL_ADHESION_MEDIATED_BY_INTEGRIN					3	CXCL13,SFRP2,DPP4	0.000553759	0.00497129
GO_BP	GO:0070663_REGULATION_OF_LEUKOCYTE_PROLIFERATION					7	IGF1,IDO1,VSIG4,LRRC32,IL20RB,CD55,IL2RA	0.000549644	0.00497129
GO_BP	GO:0016053_ORGANIC_ACID_BIOSYNTHETIC_PROCESS					9	IDO1,PTGES,KYNU,HAS1,UGDH,DCN,HSD3B7,PTGIS,ALDH1A3	0.00053431	0.0048702
GO_BP	GO:0060216_DEFINITIVE_HEMOPOIESIS					2	MFAP5,TGFBR3	0.000530075	0.00485018
GO_BP	GO:0051480_REGULATION_OF_CYTOSOLIC_CALCIUM_ION_CONCENTRATION					9	CXCL13,CXCL11,CXCL10,F2RL1,CXCL9,HTR2B,CLIC2,PDGFRA,CD55	0.000510924	0.00471119
GO_BP	GO:0014066_REGULATION_OF_PHOSPHATIDYLINOSITOL_3_KINASE_SIGNALING					5	IGF1,F2RL1,PDGFRA,KLF4,DCN	0.000487501	0.0045127
GO_BP	GO:0032682_NEGATIVE_REGULATION_OF_CHEMOKINE_PRODUCTION					2	F2RL1,KLF4	0.000453235	0.00427876
GO_BP	GO:0010544_NEGATIVE_REGULATION_OF_PLATELET_ACTIVATION					2	THBD,PDGFRA	0.000453235	0.00427876
GO_BP	GO:0070233_NEGATIVE_REGULATION_OF_T_CELL_APOPTOTIC_PROCESS					2	IDO1,DOCK8	0.000453235	0.00427876
GO_BP	GO:0090026_POSITIVE_REGULATION_OF_MONOCYTE_CHEMOTAXIS					2	CXCL12,CXCL10	0.000453235	0.00427876
GO_BP	GO:0001991_REGULATION_OF_SYSTEMIC_ARTERIAL_BLOOD_PRESSURE_BY_CIRCULATORY_RENIN_ANGIOTENSIN					2	CPA3,F2RL1	0.000453235	0.00427876
GO_BP	GO:0050798_ACTIVATED_T_CELL_PROLIFERATION					3	IGF1,LRRC32,IL2RA	0.000429425	0.00413604
GO_BP	GO:0051208_SEQUESTERING_OF_CALCIUM_ION					5	CXCL11,CXCL10,CXCL9,HTR2B,CLIC2	0.000408717	0.00396873
GO_BP	GO:0051928_POSITIVE_REGULATION_OF_CALCIUM_ION_TRANSPORT					5	CXCL11,CXCL12,CXCL10,CXCL9,CRACR2A	0.000390673	0.00382474
GO_BP	GO:0045861_NEGATIVE_REGULATION_OF_PROTEOLYSIS					9	SFRP2,SERPINF1,LXN,CR1,RARRES1,SERPING1,TFPI,C3,KLF4	0.00038775	0.00382474
GO_BP	GO:0050961_DETECTION_OF_TEMPERATURE_STIMULUS_INVOLVED_IN_SENSORY_PERCEPTION					2	CXCL12,LXN	0.000383936	0.00381396
GO_BP	GO:0051279_REGULATION_OF_RELEASE_OF_SEQUESTERED_CALCIUM_ION_INTO_CYTOSOL					4	CXCL11,CXCL10,CXCL9,CLIC2	0.000372125	0.00381396
GO_BP	GO:0033631_CELL_CELL_ADHESION_MEDIATED_BY_INTEGRIN					2	CXCL13,DPP4	0.000321845	0.00344896
GO_BP	GO:0006586_INDOLALKYLAMINE_METABOLIC_PROCESS					2	IDO1,KYNU	0.000321845	0.00344896
GO_BP	GO:0048535_LYMPH_NODE_DEVELOPMENT					2	PDPN,CD248	0.000321845	0.00344896
GO_BP	GO:0070206_PROTEIN_TRIMERIZATION					2	STEAP4,SCARA5	0.000321845	0.00344896
GO_BP	GO:0002643_REGULATION_OF_TOLERANCE_INDUCTION					2	IDO1,IL2RA	0.000321845	0.00344896
GO_BP	GO:0038084_VASCULAR_ENDOTHELIAL_GROWTH_FACTOR_SIGNALING_PATHWAY					3	VEGFD,PDGFRA,DCN	0.000296413	0.00327984
GO_BP	GO:0046903_SECRETION					25	VEGFD,TTN,IGF1,CTSC,CXCL12,F2RL1,DPP4,TNFAIP6,STXBP6,F13A1,CXCL1,CFD,HTR2B,CLEC3B,CD14,LRRC32,CR1,LTBP2,PCSK6,RAB27B,CRACR2A,SERPING1,C3,CD55,PLA2G2A	0.000293477	0.00327785
GO_BP	GO:0010633_NEGATIVE_REGULATION_OF_EPITHELIAL_CELL_MIGRATION					4	CXCL13,SERPINF1,KLF4,DCN	0.00027085	0.00303939
GO_BP	GO:0051281_POSITIVE_REGULATION_OF_RELEASE_OF_SEQUESTERED_CALCIUM_ION_INTO_CYTOSOL					3	CXCL11,CXCL10,CXCL9	0.000268444	0.00302668
GO_BP	GO:0051249_REGULATION_OF_LYMPHOCYTE_ACTIVATION					11	IGHG1,IGF1,DPP4,IDO1,VSIG4,LRRC32,CR1,DOCK8,IL20RB,CD55,IL2RA	0.000266715	0.00302149
GO_BP	GO:0010715_REGULATION_OF_EXTRACELLULAR_MATRIX_DISASSEMBLY					2	DPP4,PDPN	0.000266623	0.00302149
GO_BP	GO:1905153_REGULATION_OF_MEMBRANE_INVAGINATION					2	F2RL1,C3	0.000266623	0.00302149
GO_BP	GO:2000380_REGULATION_OF_MESODERM_DEVELOPMENT					2	SFRP2,DKK1	0.000266623	0.00302149
GO_BP	GO:0010819_REGULATION_OF_T_CELL_CHEMOTAXIS					2	CXCL13,CXCL10	0.000266623	0.00302149
GO_BP	GO:0006047_UDP_N_ACETYLGLUCOSAMINE_METABOLIC_PROCESS					2	UAP1,GFPT2	0.000266623	0.00302149
GO_BP	GO:0051240_POSITIVE_REGULATION_OF_MULTICELLULAR_ORGANISMAL_PROCESS					27	VEGFD,SEMA3C,IGF1,LUM,SFRP2,EBF2,DIO2,CXCL12,F2RL1,SERPINF1,PDPN,IDO1,HTR2B,CD14,IL1R1,TGFBR3,WNT2,PLXNC1,IL20RB,DAB2,SMURF2,THBD,C3,IL2RA,KLF4,PTGIS,DKK1	0.000264328	0.00302149
GO_BP	GO:0033627_CELL_ADHESION_MEDIATED_BY_INTEGRIN					4	CXCL13,SFRP2,DPP4,FBN1	0.000253406	0.00296972
GO_BP	GO:0009225_NUCLEOTIDE_SUGAR_METABOLIC_PROCESS					3	UAP1,UGDH,GFPT2	0.000242423	0.00286927
GO_BP	GO:1904427_POSITIVE_REGULATION_OF_CALCIUM_ION_TRANSMEMBRANE_TRANSPORT					4	CXCL11,CXCL10,CXCL9,CRACR2A	0.00023683	0.0028171
GO_BP	GO:0045600_POSITIVE_REGULATION_OF_FAT_CELL_DIFFERENTIATION					4	SFRP2,METRNL,MEDAG,CDS1	0.00023683	0.0028171
GO_BP	GO:0050777_NEGATIVE_REGULATION_OF_IMMUNE_RESPONSE					6	VSIG4,CR1,IL20RB,SERPING1,CD55,IL2RA	0.000216911	0.0026358
GO_BP	GO:0014065_PHOSPHATIDYLINOSITOL_3_KINASE_SIGNALING					6	IGF1,F2RL1,HTR2B,PDGFRA,KLF4,DCN	0.000208176	0.00255284
GO_BP	GO:0010470_REGULATION_OF_GASTRULATION					3	SFRP2,KLF4,DKK1	0.000195891	0.00243992
GO_BP	GO:0010543_REGULATION_OF_PLATELET_ACTIVATION					3	PDPN,THBD,PDGFRA	0.000195891	0.00243992
GO_BP	GO:0002683_NEGATIVE_REGULATION_OF_IMMUNE_SYSTEM_PROCESS					11	CXCL12,DPP4,IDO1,VSIG4,LRRC32,CR1,FBN1,IL20RB,SERPING1,CD55,IL2RA	0.000194907	0.00243992
GO_BP	GO:0050866_NEGATIVE_REGULATION_OF_CELL_ACTIVATION					7	IDO1,VSIG4,LRRC32,IL20RB,THBD,PDGFRA,IL2RA	0.000193615	0.00243992
GO_BP	GO:0050930_INDUCTION_OF_POSITIVE_CHEMOTAXIS					2	VEGFD,CXCL12	0.000175369	0.00225516
GO_BP	GO:0002864_REGULATION_OF_ACUTE_INFLAMMATORY_RESPONSE_TO_ANTIGENIC_STIMULUS					2	IL20RB,C3	0.000175369	0.00225516
GO_BP	GO:0072525_PYRIDINE_CONTAINING_COMPOUND_BIOSYNTHETIC_PROCESS					3	IDO1,KYNU,PTGIS	0.000175218	0.00225516
GO_BP	GO:0070661_LEUKOCYTE_PROLIFERATION					9	IGF1,F2RL1,IDO1,VSIG4,LRRC32,DOCK8,IL20RB,CD55,IL2RA	0.000169071	0.00221001
GO_BP	GO:2000401_REGULATION_OF_LYMPHOCYTE_MIGRATION					4	CXCL13,CXCL12,CXCL10,DOCK8	0.000142673	0.00190685
GO_BP	GO:0060795_CELL_FATE_COMMITMENT_INVOLVED_IN_FORMATION_OF_PRIMARY_GERM_LAYER					3	SFRP2,KLF4,DKK1	0.00013866	0.00186369
GO_BP	GO:0046349_AMINO_SUGAR_BIOSYNTHETIC_PROCESS					2	UAP1,GFPT2	0.000138609	0.00186369
GO_BP	GO:0072567_CHEMOKINE_C_X_C_MOTIF_LIGAND_2_PRODUCTION					2	F2RL1,KLF4	0.000138609	0.00186369
GO_BP	GO:0016322_NEURON_REMODELING					2	C3,NTN4	0.000138609	0.00186369
GO_BP	GO:2000052_POSITIVE_REGULATION_OF_NON_CANONICAL_WNT_SIGNALING_PATHWAY					2	DAB2,DKK1	0.000138609	0.00186369
GO_BP	GO:0060100_POSITIVE_REGULATION_OF_PHAGOCYTOSIS_ENGULFMENT					2	F2RL1,C3	0.000138609	0.00186369
GO_BP	GO:0009886_POST_EMBRYONIC_ANIMAL_MORPHOGENESIS					2	FBN1,EFEMP1	0.000138609	0.00186369
GO_BP	GO:0042659_REGULATION_OF_CELL_FATE_SPECIFICATION					2	SFRP2,DKK1	0.000138609	0.00186369
GO_BP	GO:0042110_T_CELL_ACTIVATION					12	IGF1,F2RL1,DPP4,APBB1IP,IDO1,VSIG4,LRRC32,CR1,DOCK8,IL20RB,CD55,IL2RA	0.000117218	0.00167989
GO_BP	GO:0002690_POSITIVE_REGULATION_OF_LEUKOCYTE_CHEMOTAXIS					5	VEGFD,CXCL13,CXCL12,CXCL10,F2RL1	0.000113082	0.00163044
GO_BP	GO:0006887_EXOCYTOSIS					18	VEGFD,TTN,IGF1,CTSC,F2RL1,TNFAIP6,STXBP6,F13A1,CXCL1,CFD,CLEC3B,CD14,CR1,RAB27B,CRACR2A,SERPING1,C3,CD55	0.000110725	0.00160619
GO_BP	GO:0007501_MESODERMAL_CELL_FATE_SPECIFICATION					2	SFRP2,DKK1	0.000107256	0.00157508
GO_BP	GO:0002517_T_CELL_TOLERANCE_INDUCTION					2	IDO1,IL2RA	0.000107256	0.00157508
GO_BP	GO:0006568_TRYPTOPHAN_METABOLIC_PROCESS					2	IDO1,KYNU	0.000107256	0.00157508
GO_BP	GO:1905330_REGULATION_OF_MORPHOGENESIS_OF_AN_EPITHELIUM					7	SFRP2,CXCL10,WNT2,DAB2,SMURF2,NTN4,DKK1	0.00010364	0.00155069
GO_BP	GO:0048247_LYMPHOCYTE_CHEMOTAXIS					4	CXCL13,CXCL11,CXCL10,HSD3B7	9.5352e-05	0.00143571
GO_BP	GO:0002253_ACTIVATION_OF_IMMUNE_RESPONSE					12	IGHG1,FCGR3A,C1QB,CFD,VSIG4,CR1,C1R,SERPING1,C1S,C3,CFB,CD55	9.26231e-05	0.0014035
GO_BP	GO:0022408_NEGATIVE_REGULATION_OF_CELL_CELL_ADHESION					7	CXCL12,IDO1,VSIG4,LRRC32,IL20RB,IL2RA,KLF4	8.85423e-05	0.00135027
GO_BP	GO:0009266_RESPONSE_TO_TEMPERATURE_STIMULUS					8	IGF1,CXCL12,CXCL10,LXN,SCARA5,HTR2B,CD14,METRNL	8.38253e-05	0.00129494
GO_BP	GO:0009435_NAD_BIOSYNTHETIC_PROCESS					3	IDO1,KYNU,PTGIS	8.25239e-05	0.00128316
GO_BP	GO:0019371_CYCLOOXYGENASE_PATHWAY					2	PTGES,PTGIS	8.09207e-05	0.00126651
GO_BP	GO:0070189_KYNURENINE_METABOLIC_PROCESS					2	IDO1,KYNU	8.09207e-05	0.00126651
GO_BP	GO:0010454_NEGATIVE_REGULATION_OF_CELL_FATE_COMMITMENT					2	SFRP2,DKK1	8.09207e-05	0.00126651
GO_BP	GO:0033632_REGULATION_OF_CELL_CELL_ADHESION_MEDIATED_BY_INTEGRIN					2	CXCL13,DPP4	8.09207e-05	0.00126651
GO_BP	GO:0006048_UDP_N_ACETYLGLUCOSAMINE_BIOSYNTHETIC_PROCESS					2	UAP1,GFPT2	8.09207e-05	0.00126651
GO_BP	GO:0003306_WNT_SIGNALING_PATHWAY_INVOLVED_IN_HEART_DEVELOPMENT					2	ALPK2,DKK1	8.09207e-05	0.00126651
GO_BP	GO:0050778_POSITIVE_REGULATION_OF_IMMUNE_RESPONSE					15	IGHG1,FCGR3A,F2RL1,IDO1,C1QB,CFD,VSIG4,IL1R1,CR1,C1R,SERPING1,C1S,C3,CFB,CD55	7.88101e-05	0.00126651
GO_BP	GO:0045995_REGULATION_OF_EMBRYONIC_DEVELOPMENT					6	IGF1,SFRP2,WNT2,LAMA2,KLF4,DKK1	7.68658e-05	0.00126651
GO_BP	GO:0072376_PROTEIN_ACTIVATION_CASCADE					3	F13A1,SERPING1,TFPI	7.15886e-05	0.00120787
GO_BP	GO:0050920_REGULATION_OF_CHEMOTAXIS					8	VEGFD,SEMA3C,CXCL13,CXCL12,CXCL10,F2RL1,DPP4,PDGFRA	7.04479e-05	0.00119711
GO_BP	GO:0080134_REGULATION_OF_RESPONSE_TO_STRESS					25	IGF1,SFRP2,CTSC,CXCL12,F2RL1,SERPINF1,NT5E,PDPN,TNFAIP6,IDO1,VSIG4,IL1R1,CR1,IL20RB,SERPING1,TFPI,THBD,C3,METRNL,PDGFRA,IL2RA,KLF4,PLA2G2A,PTGIS,DKK1	6.86081e-05	0.00117424
GO_BP	GO:0050819_NEGATIVE_REGULATION_OF_COAGULATION					4	SERPING1,TFPI,THBD,PDGFRA	6.70646e-05	0.00115613
GO_BP	GO:0002443_LEUKOCYTE_MEDIATED_IMMUNITY					17	IGHG1,CTSC,F2RL1,TNFAIP6,C1QB,CXCL1,CFD,CD14,IL1R1,CR1,C1R,CRACR2A,IL20RB,SERPING1,C1S,C3,CD55	6.67937e-05	0.00115613
GO_BP	GO:0050863_REGULATION_OF_T_CELL_ACTIVATION					10	IGF1,DPP4,IDO1,VSIG4,LRRC32,CR1,DOCK8,IL20RB,CD55,IL2RA	6.38226e-05	0.00112469
GO_BP	GO:0002698_NEGATIVE_REGULATION_OF_IMMUNE_EFFECTOR_PROCESS					6	VSIG4,CR1,IL20RB,SERPING1,CD55,IL2RA	6.27566e-05	0.00111416
GO_BP	GO:0097278_COMPLEMENT_DEPENDENT_CYTOTOXICITY					2	C3,CD55	5.92015e-05	0.00105895
GO_BP	GO:0042436_INDOLE_CONTAINING_COMPOUND_CATABOLIC_PROCESS					2	IDO1,KYNU	5.92015e-05	0.00105895
GO_BP	GO:0002664_REGULATION_OF_T_CELL_TOLERANCE_INDUCTION					2	IDO1,IL2RA	5.92015e-05	0.00105895
GO_BP	GO:0071621_GRANULOCYTE_CHEMOTAXIS					6	CXCL13,CXCL11,CXCL10,DPP4,CXCL9,CXCL1	5.3629e-05	0.000989173
GO_BP	GO:0002688_REGULATION_OF_LEUKOCYTE_CHEMOTAXIS					6	VEGFD,CXCL13,CXCL12,CXCL10,F2RL1,DPP4	5.3629e-05	0.000989173
GO_BP	GO:0050926_REGULATION_OF_POSITIVE_CHEMOTAXIS					3	VEGFD,CXCL12,F2RL1	5.29306e-05	0.000989173
GO_BP	GO:0010818_T_CELL_CHEMOTAXIS					3	CXCL13,CXCL11,CXCL10	5.29306e-05	0.000989173
GO_BP	GO:0070664_NEGATIVE_REGULATION_OF_LEUKOCYTE_PROLIFERATION					5	IDO1,VSIG4,LRRC32,IL20RB,IL2RA	5.26443e-05	0.000989173
GO_BP	GO:0034097_RESPONSE_TO_CYTOKINE					22	IGHG1,CXCL13,CXCL11,CXCL12,CXCL10,F2RL1,CXCL9,MRC1,F13A1,CXCL1,PTGES,CD14,KYNU,IL1R1,DOCK8,IL20RB,TFPI,IL15RA,IL2RA,KLF4,PTGIS,GFPT2	5.13235e-05	0.000989173
GO_BP	GO:0002685_REGULATION_OF_LEUKOCYTE_MIGRATION					8	VEGFD,CXCL13,CXCL12,CXCL10,F2RL1,DPP4,IL1R1,DOCK8	4.37834e-05	0.000875301
GO_BP	GO:0001775_CELL_ACTIVATION					25	IGHG1,IGF1,CTSC,CXCL10,F2RL1,DPP4,PDPN,TNFAIP6,APBB1IP,IDO1,CXCL1,CFD,VSIG4,CD14,LRRC32,CR1,DOCK8,CRACR2A,IL20RB,THBD,C3,PDGFRA,CD55,IL2RA,PLA2G2A	4.26593e-05	0.000860055
GO_BP	GO:0002524_HYPERSENSITIVITY					2	IL20RB,C3	4.16877e-05	0.000857026
GO_BP	GO:2000096_POSITIVE_REGULATION_OF_WNT_SIGNALING_PATHWAY_PLANAR_CELL_POLARITY_PATHWAY					2	DAB2,DKK1	4.16877e-05	0.000857026
GO_BP	GO:1904338_REGULATION_OF_DOPAMINERGIC_NEURON_DIFFERENTIATION					2	SFRP2,DKK1	4.16877e-05	0.000857026
GO_BP	GO:0045785_POSITIVE_REGULATION_OF_CELL_ADHESION					12	IGF1,CXCL13,SFRP2,CXCL12,DPP4,PDPN,APBB1IP,FBLN2,DOCK8,ABI3BP,CD55,IL2RA	3.58865e-05	0.000769135
GO_BP	GO:0050776_REGULATION_OF_IMMUNE_RESPONSE					19	IGHG1,CXCL13,FCGR3A,F2RL1,IDO1,C1QB,CFD,VSIG4,IL1R1,CR1,CLEC2B,C1R,IL20RB,SERPING1,C1S,C3,CFB,CD55,IL2RA	3.47607e-05	0.00075178
GO_BP	GO:0009226_NUCLEOTIDE_SUGAR_BIOSYNTHETIC_PROCESS					3	UAP1,UGDH,GFPT2	3.19468e-05	0.000697261
GO_BP	GO:2000050_REGULATION_OF_NON_CANONICAL_WNT_SIGNALING_PATHWAY					3	SFRP2,DAB2,DKK1	3.19468e-05	0.000697261
GO_BP	GO:0072676_LYMPHOCYTE_MIGRATION					6	CXCL13,CXCL11,CXCL12,CXCL10,DOCK8,HSD3B7	2.8918e-05	0.000642952
GO_BP	GO:0035754_B_CELL_CHEMOTAXIS					2	CXCL13,HSD3B7	2.79573e-05	0.000627456
GO_BP	GO:0048563_POST_EMBRYONIC_ANIMAL_ORGAN_MORPHOGENESIS					2	FBN1,EFEMP1	2.79573e-05	0.000627456
GO_BP	GO:0003307_REGULATION_OF_WNT_SIGNALING_PATHWAY_INVOLVED_IN_HEART_DEVELOPMENT					2	ALPK2,DKK1	2.79573e-05	0.000627456
GO_BP	GO:0010466_NEGATIVE_REGULATION_OF_PEPTIDASE_ACTIVITY					9	SFRP2,SERPINF1,LXN,CR1,RARRES1,SERPING1,TFPI,C3,KLF4	2.75148e-05	0.000627456
GO_BP	GO:2000404_REGULATION_OF_T_CELL_MIGRATION					4	CXCL13,CXCL12,CXCL10,DOCK8	2.40018e-05	0.000559806
GO_BP	GO:0042098_T_CELL_PROLIFERATION					8	IGF1,IDO1,VSIG4,LRRC32,DOCK8,IL20RB,CD55,IL2RA	2.31403e-05	0.000545058
GO_BP	GO:0097530_GRANULOCYTE_MIGRATION					7	CXCL13,CXCL11,CXCL10,DPP4,CXCL9,CXCL1,IL1R1	2.10619e-05	0.000506123
GO_BP	GO:0072524_PYRIDINE_CONTAINING_COMPOUND_METABOLIC_PROCESS					4	IDO1,KYNU,AOX1,PTGIS	1.89297e-05	0.000464265
GO_BP	GO:0061844_ANTIMICROBIAL_HUMORAL_IMMUNE_RESPONSE_MEDIATED_BY_ANTIMICROBIAL_PEPTIDE					5	CXCL13,CXCL11,CXCL10,CXCL9,CXCL1	1.80524e-05	0.00044736
GO_BP	GO:0002544_CHRONIC_INFLAMMATORY_RESPONSE					3	CXCL13,IDO1,PTGES	1.7812e-05	0.000446049
GO_BP	GO:0034354_DE_NOVO_NAD_BIOSYNTHETIC_PROCESS_FROM_TRYPTOPHAN					2	IDO1,KYNU	1.75774e-05	0.000444857
GO_BP	GO:2000381_NEGATIVE_REGULATION_OF_MESODERM_DEVELOPMENT					2	SFRP2,DKK1	1.75774e-05	0.000444857
GO_BP	GO:0003308_NEGATIVE_REGULATION_OF_WNT_SIGNALING_PATHWAY_INVOLVED_IN_HEART_DEVELOPMENT					2	ALPK2,DKK1	1.75774e-05	0.000444857
GO_BP	GO:0002687_POSITIVE_REGULATION_OF_LEUKOCYTE_MIGRATION					7	VEGFD,CXCL13,CXCL12,CXCL10,F2RL1,IL1R1,DOCK8	1.71457e-05	0.000444857
GO_BP	GO:0071216_CELLULAR_RESPONSE_TO_BIOTIC_STIMULUS					9	CXCL13,CXCL11,CXCL10,CXCL9,MRC1,CXCL1,CD14,TFPI,CD55	1.71279e-05	0.000444857
GO_BP	GO:0150146_CELL_JUNCTION_DISASSEMBLY					3	C1QB,C3,DKK1	1.43393e-05	0.000387651
GO_BP	GO:0072678_T_CELL_MIGRATION					5	CXCL13,CXCL11,CXCL12,CXCL10,DOCK8	1.38965e-05	0.000384417
GO_BP	GO:0098542_DEFENSE_RESPONSE_TO_OTHER_ORGANISM					22	IGHG1,JCHAIN,CXCL13,CXCL10,F2RL1,CXCL9,MRC1,C1QB,CFD,VSIG4,CD14,KYNU,CR1,C1R,ADAMTS5,SERPING1,C1S,C3,CFB,CD55,IL2RA,PLA2G2A	1.31483e-05	0.000367997
GO_BP	GO:0030593_NEUTROPHIL_CHEMOTAXIS					6	CXCL13,CXCL11,CXCL10,DPP4,CXCL9,CXCL1	1.2622e-05	0.000357474
GO_BP	GO:0048048_EMBRYONIC_EYE_MORPHOGENESIS					4	MFAP5,FBN1,EFEMP1,ALDH1A3	1.13002e-05	0.000323894
GO_BP	GO:2000403_POSITIVE_REGULATION_OF_LYMPHOCYTE_MIGRATION					4	CXCL13,CXCL12,CXCL10,DOCK8	1.13002e-05	0.000323894
GO_BP	GO:2000542_NEGATIVE_REGULATION_OF_GASTRULATION					2	SFRP2,DKK1	1.01041e-05	0.000300469
GO_BP	GO:0048050_POST_EMBRYONIC_EYE_MORPHOGENESIS					2	FBN1,EFEMP1	1.01041e-05	0.000300469
GO_BP	GO:1905902_REGULATION_OF_MESODERM_FORMATION					2	SFRP2,DKK1	1.01041e-05	0.000300469
GO_BP	GO:1905770_REGULATION_OF_MESODERMAL_CELL_DIFFERENTIATION					2	SFRP2,DKK1	1.01041e-05	0.000300469
GO_BP	GO:0044691_TOOTH_ERUPTION					2	ADAMTS5,FAM20A	1.01041e-05	0.000300469
GO_BP	GO:0071542_DOPAMINERGIC_NEURON_DIFFERENTIATION					4	VEGFD,SFRP2,WNT2,DKK1	9.83678e-06	0.000300469
GO_BP	GO:0019730_ANTIMICROBIAL_HUMORAL_RESPONSE					7	JCHAIN,CXCL13,CXCL11,CXCL10,CXCL9,CXCL1,PLA2G2A	9.38143e-06	0.000300469
GO_BP	GO:0001710_MESODERMAL_CELL_FATE_COMMITMENT					3	SFRP2,KLF4,DKK1	8.91619e-06	0.00029057
GO_BP	GO:0042130_NEGATIVE_REGULATION_OF_T_CELL_PROLIFERATION					5	IDO1,VSIG4,LRRC32,IL20RB,IL2RA	8.70645e-06	0.000287675
GO_BP	GO:0002252_IMMUNE_EFFECTOR_PROCESS					24	IGHG1,CTSC,FCGR3A,CXCL10,F2RL1,CXCL9,TNFAIP6,APBB1IP,C1QB,CXCL1,CFD,VSIG4,CD14,IL1R1,CR1,C1R,CRACR2A,IL20RB,SERPING1,C1S,C3,CFB,CD55,IL2RA	8.57604e-06	0.000287358
GO_BP	GO:0097529_MYELOID_LEUKOCYTE_MIGRATION					9	VEGFD,CXCL13,CXCL11,CXCL12,CXCL10,DPP4,CXCL9,CXCL1,IL1R1	8.39861e-06	0.000285433
GO_BP	GO:0022407_REGULATION_OF_CELL_CELL_ADHESION					13	IGF1,CXCL13,CXCL12,DPP4,PDPN,IDO1,VSIG4,LRRC32,DOCK8,IL20RB,CD55,IL2RA,KLF4	7.13932e-06	0.000249771
GO_BP	GO:1904948_MIDBRAIN_DOPAMINERGIC_NEURON_DIFFERENTIATION					3	SFRP2,WNT2,DKK1	6.86125e-06	0.000243625
GO_BP	GO:1903038_NEGATIVE_REGULATION_OF_LEUKOCYTE_CELL_CELL_ADHESION					7	CXCL12,IDO1,VSIG4,LRRC32,IL20RB,IL2RA,KLF4	6.58055e-06	0.000237199
GO_BP	GO:0071219_CELLULAR_RESPONSE_TO_MOLECULE_OF_BACTERIAL_ORIGIN					9	CXCL13,CXCL11,CXCL10,CXCL9,MRC1,CXCL1,CD14,TFPI,CD55	6.5159e-06	0.000237199
GO_BP	GO:0050818_REGULATION_OF_COAGULATION					6	F2RL1,PDPN,SERPING1,TFPI,THBD,PDGFRA	6.08529e-06	0.000226202
GO_BP	GO:0071772_RESPONSE_TO_BMP					8	SFRP2,FSTL1,TGFBR3,PCSK6,FBN1,SMURF2,HTRA3,DKK1	5.20752e-06	0.000196646
GO_BP	GO:0048569_POST_EMBRYONIC_ANIMAL_ORGAN_DEVELOPMENT					3	FBN1,EFEMP1,KLF4	5.17838e-06	0.000196646
GO_BP	GO:2000095_REGULATION_OF_WNT_SIGNALING_PATHWAY_PLANAR_CELL_POLARITY_PATHWAY					3	SFRP2,DAB2,DKK1	5.17838e-06	0.000196646
GO_BP	GO:1904995_NEGATIVE_REGULATION_OF_LEUKOCYTE_ADHESION_TO_VASCULAR_ENDOTHELIAL_CELL					2	CXCL12,KLF4	5.08214e-06	0.000196646
GO_BP	GO:0042661_REGULATION_OF_MESODERMAL_CELL_FATE_SPECIFICATION					2	SFRP2,DKK1	5.08214e-06	0.000196646
GO_BP	GO:1904956_REGULATION_OF_MIDBRAIN_DOPAMINERGIC_NEURON_DIFFERENTIATION					2	SFRP2,DKK1	5.08214e-06	0.000196646
GO_BP	GO:0019441_TRYPTOPHAN_CATABOLIC_PROCESS_TO_KYNURENINE					2	IDO1,KYNU	5.08214e-06	0.000196646
GO_BP	GO:0007159_LEUKOCYTE_CELL_CELL_ADHESION					12	IGF1,CXCL12,DPP4,NT5E,IDO1,VSIG4,LRRC32,DOCK8,IL20RB,CD55,IL2RA,KLF4	4.58588e-06	0.000194818
GO_BP	GO:0050900_LEUKOCYTE_MIGRATION					14	VEGFD,JCHAIN,CXCL13,CXCL11,CXCL12,CXCL10,F2RL1,DPP4,CXCL9,CXCL1,IL1R1,DOCK8,THBD,HSD3B7	4.4799e-06	0.000193776
GO_BP	GO:1990266_NEUTROPHIL_MIGRATION					7	CXCL13,CXCL11,CXCL10,DPP4,CXCL9,CXCL1,IL1R1	4.23879e-06	0.000186742
GO_BP	GO:0060326_CELL_CHEMOTAXIS					11	VEGFD,CXCL13,CXCL11,CXCL12,CXCL10,F2RL1,DPP4,CXCL9,CXCL1,PDGFRA,HSD3B7	3.90366e-06	0.000181741
GO_BP	GO:2000406_POSITIVE_REGULATION_OF_T_CELL_MIGRATION					4	CXCL13,CXCL12,CXCL10,DOCK8	3.86613e-06	0.000181741
GO_BP	GO:0002250_ADAPTIVE_IMMUNE_RESPONSE					14	IGHG1,JCHAIN,CXCL13,CTSC,C1QB,IL1R1,CR1,C1R,CRACR2A,IL20RB,SERPING1,C1S,C3,CD55	3.24392e-06	0.000160777
GO_BP	GO:0019724_B_CELL_MEDIATED_IMMUNITY					8	IGHG1,C1QB,CR1,C1R,SERPING1,C1S,C3,CD55	2.27849e-06	0.000120456
GO_BP	GO:0051272_POSITIVE_REGULATION_OF_CELLULAR_COMPONENT_MOVEMENT					16	VEGFD,SEMA3C,IGF1,CXCL13,CXCL12,CXCL10,F2RL1,PDPN,TNFAIP6,IL1R1,DOCK8,RRAS2,DAB2,SMURF2,PDGFRA,TWIST2	2.24897e-06	0.000120456
GO_BP	GO:0002449_LYMPHOCYTE_MEDIATED_IMMUNITY					11	IGHG1,CTSC,C1QB,IL1R1,CR1,C1R,IL20RB,SERPING1,C1S,C3,CD55	2.08346e-06	0.000115269
GO_BP	GO:0009996_NEGATIVE_REGULATION_OF_CELL_FATE_SPECIFICATION					2	SFRP2,DKK1	2.04497e-06	0.000115269
GO_BP	GO:0031347_REGULATION_OF_DEFENSE_RESPONSE					18	IGF1,CTSC,F2RL1,SERPINF1,NT5E,TNFAIP6,IDO1,VSIG4,IL1R1,CR1,IL20RB,SERPING1,C3,METRNL,IL2RA,KLF4,PLA2G2A,PTGIS	2.00068e-06	0.000115269
GO_BP	GO:0002682_REGULATION_OF_IMMUNE_SYSTEM_PROCESS					29	VEGFD,IGHG1,IGF1,CXCL13,CTSC,CXCL12,FCGR3A,CXCL10,F2RL1,DPP4,IDO1,C1QB,CFD,VSIG4,IL1R1,LRRC32,CR1,DOCK8,CLEC2B,C1R,FBN1,IL20RB,SERPING1,C1S,C3,CFB,CD55,IL2RA,PLA2G2A	1.94893e-06	0.000115269
GO_BP	GO:0030595_LEUKOCYTE_CHEMOTAXIS					10	VEGFD,CXCL13,CXCL11,CXCL12,CXCL10,F2RL1,DPP4,CXCL9,CXCL1,HSD3B7	1.74587e-06	0.000109301
GO_BP	GO:0030514_NEGATIVE_REGULATION_OF_BMP_SIGNALING_PATHWAY					5	SFRP2,FBN1,SMURF2,HTRA3,DKK1	1.56462e-06	0.000100601
GO_BP	GO:0098883_SYNAPSE_PRUNING					3	C1QB,C3,DKK1	1.28381e-06	8.48386e-05
GO_BP	GO:0002697_REGULATION_OF_IMMUNE_EFFECTOR_PROCESS					14	IGHG1,F2RL1,C1QB,VSIG4,IL1R1,CR1,C1R,IL20RB,SERPING1,C1S,C3,CFB,CD55,IL2RA	1.21983e-06	8.42346e-05
GO_BP	GO:0002576_PLATELET_DEGRANULATION					8	VEGFD,TTN,IGF1,F13A1,CFD,CLEC3B,RAB27B,SERPING1	9.56929e-07	6.89859e-05
GO_BP	GO:0050865_REGULATION_OF_CELL_ACTIVATION					17	IGHG1,IGF1,CTSC,F2RL1,DPP4,PDPN,IDO1,VSIG4,LRRC32,CR1,DOCK8,IL20RB,THBD,PDGFRA,CD55,IL2RA,PLA2G2A	8.14564e-07	6.25112e-05
GO_BP	GO:1990868_RESPONSE_TO_CHEMOKINE					7	CXCL13,CXCL11,CXCL12,CXCL10,CXCL9,CXCL1,DOCK8	7.16762e-07	5.68392e-05
GO_BP	GO:0002237_RESPONSE_TO_MOLECULE_OF_BACTERIAL_ORIGIN					13	CXCL13,CXCL11,CXCL10,CXCL9,IDO1,MRC1,CXCL1,PTGES,CD14,TFPI,THBD,CD55,DCN	5.90536e-07	4.84443e-05
GO_BP	GO:0030451_REGULATION_OF_COMPLEMENT_ACTIVATION_ALTERNATIVE_PATHWAY					2	VSIG4,CR1	5.14293e-07	4.36965e-05
GO_BP	GO:0002460_ADAPTIVE_IMMUNE_RESPONSE_BASED_ON_SOMATIC_RECOMBINATION_OF_IMMUNE_RECEPTORS_BUILT_FROM_IMMUNOGLOBULIN_SUPERFAMILY_DOMAINS					12	IGHG1,CXCL13,CTSC,C1QB,IL1R1,CR1,C1R,IL20RB,SERPING1,C1S,C3,CD55	4.50637e-07	3.97061e-05
GO_BP	GO:0030510_REGULATION_OF_BMP_SIGNALING_PATHWAY					7	SFRP2,FSTL1,PCSK6,FBN1,SMURF2,HTRA3,DKK1	4.2275e-07	3.86816e-05
GO_BP	GO:0002684_POSITIVE_REGULATION_OF_IMMUNE_SYSTEM_PROCESS					24	VEGFD,IGHG1,IGF1,CXCL13,CTSC,CXCL12,FCGR3A,CXCL10,F2RL1,DPP4,IDO1,C1QB,CFD,VSIG4,IL1R1,CR1,DOCK8,C1R,SERPING1,C1S,C3,CFB,CD55,IL2RA	2.68819e-07	2.55809e-05
GO_BP	GO:0050728_NEGATIVE_REGULATION_OF_INFLAMMATORY_RESPONSE					9	IGF1,SERPINF1,NT5E,TNFAIP6,IL20RB,METRNL,IL2RA,KLF4,PTGIS	2.30626e-07	2.28608e-05
GO_BP	GO:0050727_REGULATION_OF_INFLAMMATORY_RESPONSE					14	IGF1,CTSC,SERPINF1,NT5E,TNFAIP6,IDO1,IL1R1,IL20RB,C3,METRNL,IL2RA,KLF4,PLA2G2A,PTGIS	2.2081e-07	2.28394e-05
GO_BP	GO:0048585_NEGATIVE_REGULATION_OF_RESPONSE_TO_STIMULUS					34	SEMA3C,IGF1,CXCL13,SFRP2,CXCL12,F2RL1,ALPK2,DPP4,SERPINF1,NT5E,TNFAIP6,HTR2B,VSIG4,CD14,CR1,TGFBR3,CLIC2,FBN1,IL20RB,SERPING1,DAB2,SMURF2,TFPI,THBD,METRNL,PDGFRA,CD55,IL2RA,KLF4,DCN,IGFBP6,PTGIS,HTRA3,DKK1	3.90011e-08	4.41827e-06
GO_BP	GO:0002921_NEGATIVE_REGULATION_OF_HUMORAL_IMMUNE_RESPONSE					4	VSIG4,CR1,SERPING1,CD55	3.89985e-08	4.41827e-06
GO_BP	GO:0009607_RESPONSE_TO_BIOTIC_STIMULUS					32	VEGFD,IGHG1,JCHAIN,CXCL13,CXCL11,CXCL12,CXCL10,F2RL1,CXCL9,IDO1,MRC1,C1QB,CXCL1,PTGES,CFD,VSIG4,CD14,KYNU,CR1,C1R,ADAMTS5,SERPING1,C1S,TFPI,THBD,C3,CFB,CD55,IL2RA,DCN,PLA2G2A,FAM20A	2.72487e-08	3.60137e-06
GO_BP	GO:0031348_NEGATIVE_REGULATION_OF_DEFENSE_RESPONSE					12	IGF1,SERPINF1,NT5E,TNFAIP6,VSIG4,CR1,IL20RB,SERPING1,METRNL,IL2RA,KLF4,PTGIS	1.86483e-08	2.60966e-06
GO_BP	GO:0009617_RESPONSE_TO_BACTERIUM					21	VEGFD,IGHG1,JCHAIN,CXCL13,CXCL11,CXCL10,F2RL1,CXCL9,IDO1,MRC1,CXCL1,PTGES,CD14,ADAMTS5,TFPI,THBD,C3,CD55,DCN,PLA2G2A,FAM20A	4.35853e-09	6.48059e-07
GO_BP	GO:0045916_NEGATIVE_REGULATION_OF_COMPLEMENT_ACTIVATION					4	VSIG4,CR1,SERPING1,CD55	3.91885e-09	6.21529e-07
GO_BP	GO:0002455_HUMORAL_IMMUNE_RESPONSE_MEDIATED_BY_CIRCULATING_IMMUNOGLOBULIN					8	IGHG1,C1QB,CR1,C1R,SERPING1,C1S,C3,CD55	3.72797e-09	6.21529e-07
GO_BP	GO:0006954_INFLAMMATORY_RESPONSE					23	IGF1,CXCL13,CTSC,CXCL11,CXCL10,F2RL1,SERPINF1,CXCL9,NT5E,TNFAIP6,IDO1,CXCL1,LXN,PTGES,CD14,IL1R1,IL20RB,C3,METRNL,IL2RA,KLF4,PLA2G2A,PTGIS	3.70307e-09	6.21529e-07
GO_BP	GO:0006957_COMPLEMENT_ACTIVATION_ALTERNATIVE_PATHWAY					5	CFD,VSIG4,CR1,C3,CFB	1.17357e-09	2.79192e-07
GO_BP	GO:0032101_REGULATION_OF_RESPONSE_TO_EXTERNAL_STIMULUS					29	VEGFD,SEMA3C,IGF1,CXCL13,CTSC,CXCL12,CXCL10,F2RL1,DPP4,SERPINF1,NT5E,PDPN,TNFAIP6,IDO1,VSIG4,IL1R1,CR1,IL20RB,SERPING1,TFPI,THBD,C3,METRNL,PDGFRA,CD55,IL2RA,KLF4,PLA2G2A,PTGIS	4.10983e-10	1.22216e-07
GO_BP	GO:0032102_NEGATIVE_REGULATION_OF_RESPONSE_TO_EXTERNAL_STIMULUS					18	SEMA3C,IGF1,CXCL13,DPP4,SERPINF1,NT5E,TNFAIP6,VSIG4,CR1,IL20RB,SERPING1,TFPI,THBD,METRNL,PDGFRA,IL2RA,KLF4,PTGIS	1.47651e-10	5.01804e-08
GO_BP	GO:0006952_DEFENSE_RESPONSE					39	IGHG1,JCHAIN,IGF1,CXCL13,CTSC,CXCL11,CXCL12,CXCL10,F2RL1,DPP4,SERPINF1,CXCL9,NT5E,TNFAIP6,IDO1,MRC1,C1QB,CXCL1,LXN,PTGES,CFD,VSIG4,CD14,KYNU,IL1R1,CR1,C1R,ADAMTS5,IL20RB,SERPING1,C1S,C3,CFB,METRNL,CD55,IL2RA,KLF4,PLA2G2A,PTGIS	5.6208e-11	2.22865e-08
GO_BP	GO:0006956_COMPLEMENT_ACTIVATION					11	IGHG1,C1QB,CFD,VSIG4,CR1,C1R,SERPING1,C1S,C3,CFB,CD55	6.76488e-12	3.21873e-09
GO_BP	GO:0002920_REGULATION_OF_HUMORAL_IMMUNE_RESPONSE					11	IGHG1,CXCL13,C1QB,VSIG4,CR1,C1R,SERPING1,C1S,C3,CFB,CD55	2.47756e-12	1.47353e-09
GO_BP	GO:0006959_HUMORAL_IMMUNE_RESPONSE					18	IGHG1,JCHAIN,CXCL13,CXCL11,CXCL10,CXCL9,C1QB,CXCL1,CFD,VSIG4,CR1,C1R,SERPING1,C1S,C3,CFB,CD55,PLA2G2A	1.01039e-12	8.0124e-10
