# Supplementary material for: CSPG4 expression in soft tissue sarcomas is associated with poor prognosis and low cytotoxic immune response
Source: J Transl Med. 2022 Oct 11;20:464. doi: 10.1186/s12967-022-03679-y (PMC9552405; doi:10.1186/s12967-022-03679-y)
Supplement: Supplementary file 13 — Additional file 13: Table S8. (File format .xls). Expression data of each tumor normalised and used for the paper. [file 12967_2022_3679_MOESM13_ESM.xlsx]

## Sheet: Table S5
Table S5: Expression data of each tumor normalised and used for the paper.
Experiment ID	Cohort	TILs, TILscore	TILs, Lymphoids score	TILs, Myeloids score	Bindea, B cells	Bindea, T cells	Bindea, T helper cells	Bindea, Tcm	Bindea, Tem	Bindea, Th1 cells	Bindea, Th2 cells	Bindea, TFH	Bindea, Th17 cells	Bindea, TReg	Bindea, CD8 T cells	Bindea, Tgd	Bindea, Cytotoxic cells	Bindea, NK cells	Bindea, NK CD56dim cells	Bindea, NK CD56bright cells	Bindea, DC	Bindea, iDC	Bindea, aDC	Bindea, pDC	Bindea, Eosinophils	Bindea, Macrophages	Bindea, Mast_cells	Bindea, Neutrophils	Bindea, Blood vessels	Bindea, Lymph vessels	Gatza, Acidosis	Gatza, Hypoxia	Gatza, LacticAcidosis	Rooney, Cytolytic activity	APMS score	ICR score	TIS score	TLS score	Kinche, Myofibroblast IBD	Kinchen, Stromal1 IBD	Kinchen, Stromal2 IBD	Kinchen, Stromal3 IBD	Kinchen, Stromal4 IBD	Tuveson; apCAF	Tuveson, iCAF	Tuveson, myCAF	CSPG4 mRNA (log2)	CSPG4 mRNA status
GSM77761	Nielsen	0.343026	0.557834	-0.0936797	-0.22567	0.30609	0.00859971	0.738801	0.667172	-0.265608	0.200946	0.0214362	0.357605	NA	-0.314015	-0.75565	0.0544954	0.14006	-0.271169	0.0523188	0.524383	0.100717	-0.503466	NA	0.16718	-0.100352	-0.230447	0.337196	-0.44518	-0.165116	0.868053	0.368145	0.731267	-0.208628	-0.0885125	-0.185601	0.0743592	-0.177682	-0.003	0.134	0.091	-0.068	-0.008	-0.22	-0.1	0.367	13.6188	high
GSM77762	Nielsen	0.368395	0.410178	-0.00221056	-0.509768	0.930135	0.14245	0.190539	0.333003	-0.125663	-0.0872025	0.00301784	-1.59729	NA	-0.37882	1.29563	-0.353159	0.220053	-0.0406906	-0.0617896	-0.244995	-0.237678	-0.0106141	NA	0.379761	-0.0380683	-0.0207106	0.25438	0.255511	0.0847392	0.653933	0.233669	0.620544	-1.05234	-0.612802	0.0324304	-0.125557	-0.153044	0.103	0.199	0.094	0.156	0.182	0.018	-0.065	-0.135	12.7128	high
GSM77777	Nielsen	-0.132098	-0.159722	-0.136419	0.045888	-0.500769	-0.0394923	0.00111596	-0.2641	0.257868	-0.0597913	-0.359832	NA	NA	0.192307	0.16106	-0.0651052	0.166228	-0.11902	0.00824005	0.322776	-0.216861	0.349918	NA	0.428323	-0.183871	0.183567	0.113543	-1.98738	-0.239557	0.133986	0.495274	0.184499	0.826264	-4.09912	0.107947	-0.250758	-0.166447	0.027	0.107	-0.019	-0.008	-0.033	-0.967	-0.535	0.071	11.4286	low
GSM77778	Nielsen	-0.130867	0.278811	-0.405142	-0.194476	-0.790087	-0.991823	-0.253671	-0.216977	-0.201669	0.0867732	-0.0232295	NA	NA	0.252857	0.0398073	0.128335	0.180129	0.135212	-0.150232	-0.301813	-0.338059	0.214523	NA	0.412416	-0.129348	0.458308	0.10812	0.31863	-0.373354	0.294908	0.158519	0.99787	0.799545	-0.250273	0.494548	0.432443	0.415996	-0.056	-0.127	-0.053	-0.195	0.032	-0.14	0.193	0.005	10.0294	low
GSM77779	Nielsen	0.208763	0.0188624	-0.222698	-0.142716	-0.766314	-0.326726	0.335377	-0.127434	-0.158246	-0.377946	0.114196	NA	NA	-1.87947e-05	-0.50229	0.0559969	0.348346	-0.177257	0.1654	0.640078	-0.53048	0.665006	NA	0.0896775	-0.336566	0.188276	-0.353932	-0.0433624	-0.779456	0.528601	0.425926	0.86842	1.35589	-2.07186	0.309516	0.0252989	0.0529347	-0.033	0.09	-0.026	0.015	-0.009	-0.182	0.029	-0.28	10.4848	low
GSM77782	Nielsen	-0.133021	-0.154152	-0.241764	-0.285659	0.734835	-0.1477	0.368168	-0.310897	0.226467	-0.56657	-0.238362	NA	NA	-0.103303	-0.521009	0.158097	0.600845	-0.326634	0.341738	0.970738	-0.390289	1.0279	NA	0.445637	0.0548055	0.136423	0.191671	-1.34273	-0.700431	0.139717	0.643918	0.190022	0.910491	-2.52459	-0.0265906	0.0206784	0.131818	-0.083	0.205	-0.019	-0.007	-0.07	-0.541	0.315	-0.109	11.0862	low
GSM77758	Nielsen	-0.216966	0.177439	-0.553808	0.228856	0.116606	-0.00226066	-0.0200489	-0.515531	0.076882	0.493216	-0.304336	0.807025	NA	0.319384	-0.332544	0.212482	0.136187	-0.0108998	0.750527	0.166178	0.113054	0.321808	NA	-0.130606	0.00149219	-0.27137	-0.371469	-1.26477	-1.35454	0.548851	0.930787	0.853133	0.407565	-0.940049	-0.260517	-1.06519	-0.0550983	-0.065	0.049	0.051	0.117	-0.029	0.105	-0.605	-0.048	11.1843	low
GSM77784	Nielsen	-0.192828	0.36575	-0.731574	-0.23049	0.253768	-0.132607	-0.146852	-0.0801911	0.0641927	0.65405	0.334554	-0.450304	NA	0.2738	-0.147529	-0.529474	0.0893559	0.122821	0.436668	0.376369	-0.073321	0.20656	NA	-0.219962	-0.498534	0.0706777	0.0830222	2.22055	-0.699432	0.886541	0.61928	0.308561	-0.628053	-0.988046	-0.194605	-0.366031	-0.174832	-0.097	-0.001	-0.055	-0.147	-0.036	0.287	-0.186	-0.251	10.7034	low
GSM77753	Nielsen	0.0134976	-0.366507	-0.0188411	0.2649	-0.391507	-0.180965	-0.210816	-0.37813	0.137583	-0.0403363	-0.439583	-0.257636	NA	0.328939	-0.467365	0.215189	-0.0775248	0.178146	-0.710036	-0.0788246	-0.123661	0.123212	NA	-0.293995	0.0112897	-0.00415278	0.155538	0.569593	-0.773731	0.990206	0.328213	0.25822	0.710379	-0.669951	-0.0535864	0.377886	-0.468467	0.131	0.066	-0.091	0.082	-0.123	0.167	-0.111	0.037	14.321	high
GSM77796	Nielsen	0.372552	-0.178357	0.372733	-0.0345857	-0.253861	-0.10551	-0.455835	-0.116227	0.00464876	-0.136314	-0.24513	0.381532	NA	0.262832	-0.12754	0.471139	0.348403	0.397949	-0.714463	0.115168	0.150534	-0.521773	NA	-0.115124	0.598783	0.0302799	0.227556	2.05846	-0.661684	0.937236	0.54821	0.198713	-0.199405	-2.42686	0.204722	-0.230221	0.843143	0.046	-0.021	-0.012	0.131	-0.113	0.194	-0.234	-0.217	14.0945	high
GSM77798	Nielsen	0.172769	-0.319023	-0.217543	-0.0936061	0.0174581	0.00123116	-0.162202	-0.553025	-0.484947	0.187133	0.0289943	0.468918	NA	-0.127606	-0.974762	0.637479	0.4585	-0.0544488	-0.328947	-0.0810156	-0.196316	-0.0937315	NA	-0.581714	0.031634	0.225327	-0.180956	NA	-0.00419444	0.662111	0.818852	0.417509	0.907923	-2.59719	0.0680746	0.0967432	0.501905	0.036	-0.022	-0.067	0.14	-0.134	0.29	-0.57	0.018	13.1332	high
GSM77759	Nielsen	-0.189349	0.48971	-0.423167	0.273256	-0.136944	0.0637008	0.103107	0.17751	0.237104	-0.0806472	0.313257	1.45909	NA	-0.483077	-1.01409	0.240072	-0.0305849	-0.252676	-0.641366	-0.152885	0.148524	-0.645258	NA	-0.0333884	-0.0903585	-0.349964	0.0804436	-1.183	0.646424	0.685946	0.361258	0.156931	-0.929009	0.529235	-0.437878	-0.244732	-0.140699	-0.117	-0.031	0.043	-0.017	0.016	-0.003	0.133	-0.17	11.663	low
GSM77766	Nielsen	-0.229519	0.681347	-0.564478	-0.446524	0.278697	0.270292	0.256176	-0.17842	0.186341	-0.183234	0.032035	0.678084	NA	-0.194411	0.26999	-0.0556775	-0.501457	0.569426	-1.50253	-0.154899	0.000331853	0.915482	NA	0.100879	-0.240691	0.534437	-0.021006	0.0405665	-0.00646609	0.449393	0.375117	0.240465	-0.745593	2.06636	0.0498252	0.199374	0.375695	-0.148	0.075	-0.022	0.08	-0.134	-0.035	0.088	-0.079	11.8216	high
GSM77767	Nielsen	-0.243112	0.737951	-0.583582	-0.216867	0.0859633	0.219996	0.0209876	-0.311882	0.202168	0.0633336	0.280926	0.597206	NA	-0.222338	-0.93845	0.0483805	-0.130989	-0.423259	-0.810719	-0.270675	0.129918	1.1332	NA	-0.000140536	0.0212484	-0.258763	0.0196037	0.0590863	-1.60658	0.599088	0.49987	0.401904	-1.22035	-1.16035	0.158498	0.353538	0.123854	-0.02	-0.017	-0.006	0.08	0.079	0.053	-0.065	0.365	11.3204	low
GSM77769	Nielsen	-0.303259	0.721456	-0.64185	-0.477494	0.231697	0.219626	0.146937	0.194867	0.172745	0.0666414	0.0987304	1.17079	NA	-0.257284	-0.441012	0.0911962	-0.00783654	-0.0998059	-0.77712	-0.0851106	0.143876	0.355016	NA	-0.0129042	-0.102252	0.022132	-0.0464005	-0.220209	0.757111	0.206439	0.251842	0.420804	-1.22059	1.63739	-0.00404292	0.053734	-0.119696	-0.107	0.038	0.027	0.063	-0.029	0.14	-0.075	-0.278	11.6472	low
GSM77775	Nielsen	0.0234643	0.722717	-0.388674	-0.0815368	0.439752	0.0481442	-0.0397331	-0.394325	0.458236	-0.502137	-0.236328	-0.994735	NA	-0.183872	-1.05312	0.0874759	-0.425158	-0.510149	-0.760401	0.0248894	0.302164	0.731161	NA	0.234029	0.165642	-0.0520459	-0.0713358	0.124264	0.409981	0.449832	0.918086	0.212907	-0.474672	0.294218	0.00209879	0.135523	0.0455902	-0.035	0.033	0.126	0.103	0.003	-0.792	-0.213	0.147	11.9529	high
GSM77780	Nielsen	-0.00936853	0.751478	-0.509084	-0.361109	0.256366	-0.0359356	0.0962427	-0.0687246	0.267841	-0.291973	0.207374	0.746667	NA	-0.0604588	-0.743276	0.355489	0.168117	-0.0954241	-0.702344	-0.455098	0.0649062	0.588765	NA	-0.022113	0.052967	-0.0910607	-0.0746019	0.54047	0.193842	0.620973	0.351262	0.25042	-0.602558	0.101877	0.0872003	0.0190646	0.207965	-0.07	0.094	0.064	0.237	-0.011	-0.376	0.081	0.157	12.0853	high
GSM77790	Nielsen	-0.275398	0.618783	-0.507447	-0.396597	0.160719	0.299872	-0.154978	-0.278633	0.293354	0.064671	0.107633	-0.0497163	NA	-0.218801	-0.64807	0.3649	0.258433	-0.00747532	-0.348354	-1.05003	-0.135486	0.882709	NA	0.12196	-0.21706	-0.282644	-0.0719186	0.16453	0.706693	0.511392	0.232722	0.479151	-0.537891	-3.59338	0.0267083	0.00121099	-0.154674	-0.079	0.011	0.085	0.041	-0.114	0.084	-0.123	0.229	11.1651	low
GSM77791	Nielsen	-0.599032	0.436593	-0.557023	-0.0685778	0.594549	-0.195844	-0.0865724	0.0535723	-0.168853	-0.152225	0.081791	0.293947	NA	-0.380824	-0.901508	0.0149721	-0.285494	-0.29025	-1.08732	-0.114427	-0.0961401	0.829282	NA	0.110678	0.0417391	0.37621	-0.0742615	-0.572836	1.67783	0.276907	0.730806	0.326223	-0.858076	0.492103	-0.14532	0.399038	0.329843	-0.054	-0.077	0.018	0.041	0.018	-0.007	-0.173	0.075	11.4413	low
GSM77797	Nielsen	-0.083119	0.630963	-0.539268	0.255289	-0.0695499	-0.0634376	-0.0196278	-0.229546	0.435728	0.220119	-0.106996	0.130303	NA	-0.13163	-0.816881	-0.343384	0.0128728	-0.184554	-0.313736	-0.186199	0.167284	-0.213694	NA	-0.0833671	-0.0788455	0.560401	-0.153836	-0.180591	-1.90976	0.987634	0.762269	0.103577	-0.876952	1.25194	-0.412616	0.212555	-0.349712	-0.011	0.031	0.042	0.117	-0.05	-0.391	-0.116	0.207	11.6952	high
GSM77754	Nielsen	-0.27226	-0.178275	-0.389671	-0.000891678	0.0658268	0.115224	-0.259505	0.26265	-0.0715905	0.116967	0.298596	-1.33153	NA	-0.0593743	0.539817	-0.00923128	-0.0614914	0.105724	0.284331	-0.317781	0.313238	-0.58433	NA	-0.0977474	-0.0676971	-0.357215	-0.124375	-0.144575	0.430351	0.0821198	0.146075	0.626939	0.291162	4.38496	-0.325119	-0.256941	0.308999	0.111	0.052	-0.001	-0.105	0.063	0.595	0.502	-0.167	12.8002	high
GSM77756	Nielsen	-0.422285	-0.340883	-0.309355	0.0423076	-0.144532	-0.245338	-0.353944	-0.179467	0.104445	-0.107988	0.0284305	-0.824896	NA	0.0956587	0.640902	-0.20951	0.0398955	-0.42568	0.402741	0.081571	0.306789	-0.692232	NA	-0.479405	-0.232168	-0.00324001	0.328872	-0.189691	0.417026	0.316201	0.813056	0.0330046	-0.413869	1.81562	0.251204	0.13868	0.203912	0.032	-0.092	0.023	-0.057	0.172	-0.084	0.424	-0.358	12.7447	high
GSM77757	Nielsen	-0.0746456	-0.219843	-0.0558334	0.00764609	0.177555	0.117915	0.118561	-0.0258411	0.218228	0.0112466	-0.0455105	-0.811076	NA	-0.312513	0.572936	-0.583369	0.0651088	0.217103	0.599876	0.198876	0.0365487	-0.0460142	NA	-0.0407766	-0.127726	-0.253921	0.00337678	-0.312921	0.493218	0.0620993	0.0665038	0.408769	-0.800599	3.36571	0.0466994	-0.479486	0.0102418	0.036	-0.072	-0.06	-0.096	0.08	0.541	0.234	-0.47	12.6291	high
GSM77760	Nielsen	0.0511184	0.125094	-0.39912	0.218303	0.409201	-0.163913	0.0410826	0.29584	0.320756	0.0995059	-0.0480546	-0.730856	NA	-0.0652794	0.482064	-0.609841	0.0100731	0.364781	0.388739	0.922449	-0.23454	0.137112	NA	0.429523	0.197055	-0.462225	-0.121797	0.226905	-0.156165	0.101262	0.0205667	0.687617	-0.311458	6.02538	-0.117048	-0.0241575	-0.0359235	-0.016	-0.248	-0.088	-0.048	-0.145	0.133	0.301	-0.031	12.153	high
GSM77763	Nielsen	-0.198805	-0.181781	-0.293572	-0.155981	-0.134851	0.00851218	0.223737	0.368417	-0.0613419	-0.0615693	0.220001	-0.217618	NA	0.0139442	-0.0564668	0.225596	-0.258884	0.0979322	0.340782	-0.412467	0.456242	-0.855352	NA	-0.107228	0.186631	0.0279653	-0.060925	-0.951102	0.835248	0.774612	0.977964	0.348814	0.194312	1.81136	-0.124111	0.324173	0.107993	0.075	0.101	-0.016	-0.034	0.188	-0.201	0.242	0.049	12.7789	high
GSM77764	Nielsen	-0.388631	-0.305346	-0.56074	-0.00676893	-0.152906	0.156906	0.0534248	-0.087351	-0.484331	0.0030232	0.185784	-0.758675	NA	0.197289	0.365218	0.231026	-0.0345199	0.541672	0.0580232	0.540615	0.0178443	-0.140834	NA	-0.28434	0.120258	0.483774	0.159876	-0.57838	-0.0759913	0.584851	0.509385	0.381389	0.524087	-0.273948	0.350674	-0.167221	0.0119042	0.048	0.081	-0.006	-0.052	-0.004	-0.316	0.704	0.073	12.8161	high
GSM77783	Nielsen	-0.361514	-0.0791963	-0.585634	-0.149438	-0.327896	0.264965	-0.183334	-0.0786365	0.0520945	0.0612506	-0.0382944	0.0807714	NA	0.183329	0.454985	-0.469785	-0.0117969	0.169431	0.507392	0.339997	-0.0368132	-0.246981	NA	-0.17476	0.0710301	-0.0863173	0.149486	-0.505295	-0.0708818	0.0612104	0.858178	0.94211	-0.489723	3.98693	0.275326	-0.422613	-0.122138	0.026	-0.095	-0.114	0.008	0.156	0.317	0.326	0.015	13.2553	high
GSM77787	Nielsen	-0.543882	0.0212847	-0.627235	-0.102132	0.176837	-0.188581	-0.316476	-0.132916	0.0423285	0.124579	0.119473	-1.01764	NA	0.189529	0.269399	0.25641	-0.29718	-0.473587	0.138838	-0.227682	0.100198	0.554356	NA	-0.190346	-0.0921164	0.0763373	-0.035348	-0.426875	0.255379	0.218031	0.209116	0.581702	0.0361832	6.16813	-0.0788342	0.179167	0.0176775	0.129	-0.147	-0.011	-0.054	0.028	0.344	0.039	0.011	12.4134	high
GSM77789	Nielsen	-0.667951	-0.648816	-0.294161	-0.169357	-0.297124	0.0969187	0.158212	0.214784	-0.0497308	0.233895	0.248129	-0.137723	NA	0.0497903	0.0129822	-0.127416	-0.373437	0.077324	0.461936	0.165112	0.225886	0.416589	NA	-0.110523	-0.0976792	-0.0960106	-0.188395	-0.238499	0.503828	0.456781	0.902643	0.993716	0.0184445	2.25265	-0.00470695	0.0446741	-0.000774554	0.015	0.084	0.024	-0.113	0.036	0.088	0.048	-0.274	12.6547	high
GSM77765	Nielsen	0.286643	0.296219	-0.384917	0.290536	-0.0103424	-0.267016	-0.454229	0.63811	-0.395934	0.132131	-0.551046	-0.869221	NA	0.144605	-0.106706	0.312265	-0.300447	0.620312	0.480492	-0.099529	-0.513636	-0.677534	NA	0.215744	-0.0144877	0.144548	-0.0933255	-0.101568	0.48638	0.626427	0.671034	0.906661	0.29237	-2.66624	-0.558632	0.0386366	-1.03436	-0.132	-0.018	-0.044	-0.009	0.012	0.4	-0.951	-0.039	11.0735	low
GSM77781	Nielsen	0.153342	0.361437	-0.467648	0.314614	0.599648	-0.210348	0.149436	0.434548	-0.370088	0.0490072	-0.0721272	-0.166401	NA	0.0259835	0.640505	0.0748139	-0.0206798	-0.382413	-0.164982	-0.481124	0.0281772	-0.0339845	NA	0.16324	0.157284	0.173477	-0.234848	0.298274	0.198351	0.518635	0.481513	0.414594	1.25801	-1.56019	0.0202022	-0.107381	-0.195062	0.044	-0.019	0.018	-0.129	-0.148	0.422	-0.295	-0.002	11.4255	low
GSM52571	Detwiller	-0.800815	-0.299914	-0.556557	-0.136995	-0.243914	0.0905168	-0.129622	-0.372388	0.0979803	0.402848	-0.211392	0.380327	0.590419	0.0488822	-0.0123902	-0.293472	-0.106584	0.130255	-0.00740389	0.0654488	0.0325935	0.36827	-0.703711	-0.247373	0.146154	-0.110703	0.0887826	-2.42937	-0.0119317	0.178179	0.672541	0.426173	-0.447049	0.665291	0.528546	0.153187	0.354443	-0.166	-0.316	0.04	0.115	0.047	-0.159	-0.751	-0.44	12.7342	high
GSM52572	Detwiller	0.0276376	0.417433	-0.433106	0.683393	0.988111	0.438092	0.273319	0.48095	0.340097	0.12154	0.333041	-0.22504	-0.253833	0.550193	0.925839	0.671934	0.0371992	0.243257	-0.117844	-0.261436	0.149535	1.09555	1.41774	-0.276171	0.140044	-0.350813	0.297698	2.65951	0.466542	0.190749	0.347203	0.103644	2.03793	4.65628	1.51283	1.26028	1.20608	0.078	0.093	0.151	0.295	0.155	-0.246	-0.459	0.101	8.3198	low
GSM52573	Detwiller	-0.240813	0.35591	-0.663025	-0.164552	0.315637	0.466098	0.290991	0.337346	0.0351676	0.243077	0.218209	-0.167686	0.762496	0.0697132	0.326072	0.237504	0.0457908	0.116481	-0.170209	-0.51706	-0.471943	-0.149929	-1.54006	-0.153575	-0.453123	-0.378496	-0.789471	-1.56731	-0.84956	0.0562079	0.321853	0.136702	0.635207	2.13873	0.501206	-0.0600642	0.297645	-0.063	-0.083	0.04	0.002	0.047	-0.675	-1.173	-0.786	6.08617	low
GSM52574	Detwiller	-1.05582	-0.413306	-0.713909	-0.34785	-0.799711	0.258163	0.260115	0.0149884	-0.318717	-0.0653453	-0.162677	0.919029	-0.97333	0.0467266	0.427779	-0.811934	0.0409485	-0.189949	-0.181294	-0.585971	-0.456228	-0.665507	-0.464228	0.0462209	-0.3503	-0.244472	-0.643534	0.527916	0.226815	0.0859475	0.557596	0.354229	-0.919644	-2.22861	-0.86746	-0.716393	-0.921597	-0.009	0.037	0.108	-0.049	-0.036	-0.5	-0.502	0.047	6.24204	low
GSM52575	Detwiller	-1.05701	-0.49932	-0.619652	-0.142704	-0.512572	-0.0936592	-0.430031	-0.103016	-0.0937466	0.275008	0.136039	-0.702852	0.756043	0.282433	-0.369627	-0.694819	-0.118094	-0.427951	-0.150597	-0.481033	-0.112831	-0.641255	-1.1112	-0.0520902	0.111779	-0.00934875	-0.259695	-0.683761	-0.701205	0.119001	0.702632	0.161278	-1.31105	-0.97878	-0.620048	-0.928468	-0.787165	0.027	-0.004	0.052	0.187	0.142	-0.087	-0.219	0.19	11.3121	low
GSM52576	Detwiller	-0.770474	-0.177059	-0.659351	-0.0185581	0.184941	-0.230897	-0.100833	-0.107318	0.221364	0.148418	0.0204871	-0.718778	0.361341	-0.0934018	0.0629473	-0.22923	-0.0359557	-0.54381	-0.194299	-0.393133	0.012482	-0.273713	-1.00804	0.057749	0.242935	0.569193	-0.0772548	-0.365551	-0.278986	0.193008	0.560387	0.432301	0.410427	0.766545	-0.0622424	-0.0810079	0.029727	-0.128	0.288	-0.055	-0.05	-0.002	0.042	0.133	0.474	10.3563	low
GSM52577	Detwiller	-0.563424	-0.298111	-0.294791	-0.3591	-0.540185	0.0340329	0.0102738	0.399893	-0.00502642	0.0102022	-0.115173	-0.0805059	0.403285	-0.0858237	-0.992006	-0.175433	0.34795	-0.395953	-0.100658	0.636256	0.0775511	-1.09754	-0.592443	-0.138491	0.0665894	-0.458408	-0.314066	-0.725914	-0.790053	0.124385	0.372584	0.586003	-0.427917	1.55196	-0.470372	-0.559851	-0.642748	0	0.376	0.138	0.039	0.021	-0.434	-0.228	0.26	14.0675	high
GSM52580	Detwiller	-0.47657	-0.216195	-0.289306	-0.10079	0.0593817	0.309587	5.89891e-05	0.0572708	-0.159061	0.206175	0.148248	-0.764017	0.194642	-0.0326194	0.213792	0.0503159	0.183105	-0.611091	-0.561034	0.204644	0.328255	0.291327	0.599812	0.0614067	0.328568	0.309717	-0.190498	-0.0655246	-0.319649	0.653104	0.535154	0.196266	-0.37873	5.22282	-0.0497769	0.297479	0.213525	0.482	0.056	-0.091	0.164	0.183	0.355	-0.02	0.201	11.7462	high
GSM52581	Detwiller	-0.352932	0.0622258	-0.461286	0.0489998	0.337298	0.204168	0.039777	0.088506	0.190433	0.353106	-0.241662	0.163967	0.292511	-0.207066	0.472859	0.397527	-0.124812	-0.572282	0.0621966	0.380444	0.36849	0.477514	0.859927	0.0920286	0.436008	0.41325	0.094846	0.667598	-0.161685	0.83913	0.926751	0.230004	0.946855	2.548	0.20501	0.406987	0.846777	0.418	0.221	-0.011	0.294	0.102	0.139	0.373	0.44	11.6587	low
GSM52582	Detwiller	-0.939173	-0.248934	-0.766932	-0.147403	-0.404318	0.148105	-0.0437767	0.335388	-0.0595206	0.489017	-0.443228	-1.34798	1.11525	-0.569758	-0.8746	-0.775694	0.304524	-0.270312	-0.472732	-0.948574	-0.271865	-0.345412	1.28879	-0.441249	-0.488854	-0.162944	-0.455838	-1.5483	-0.587902	0.677362	0.3091	0.398085	-1.24928	2.58217	-0.658167	-0.942692	-0.892849	0.447	-0.266	-0.08	-0.014	-0.144	-0.554	-0.43	0.161	14.2658	high
GSM52583	Detwiller	-0.611262	-0.207664	-0.448443	0.106563	-0.443469	-0.128804	-0.102166	-0.266901	-0.0304601	0.598234	-0.0744025	-0.277388	0.576438	-0.229912	0.0794921	-0.420952	0.445828	0.000479738	0.0884959	-0.65826	-0.0520958	-0.241514	0.548968	-0.0704403	0.170394	-0.173709	-0.0197692	-0.652353	0.18204	0.343813	0.548047	0.156121	0.400131	2.03636	0.104891	0.351851	0.167118	0.301	0.023	-0.003	0.088	0.04	0.103	-0.023	0.418	13.1722	high
GSM52584	Detwiller	-0.679082	-0.174874	-0.560231	0.103119	-0.000512709	-0.152214	0.0215463	-0.273957	0.0397891	-0.000397323	-0.274728	0.10363	-2.05741	-0.174408	-0.00230222	-0.0471131	0.104444	-0.364758	-0.0990216	-0.765052	-0.0745651	0.275467	0.694131	-0.193522	-0.0335922	-0.206305	0.0848797	-0.0580859	-0.724773	0.478659	0.432075	0.737962	0.104175	-0.18665	-0.0876179	0.300957	-0.199828	0.211	-0.187	-0.1	-0.214	-0.146	-0.181	-0.264	0.381	11.3031	low
GSM52585	Detwiller	-0.0798159	0.257815	-0.375146	0.548214	0.592059	-0.0103438	-0.0210536	0.0228896	-0.121487	0.0188306	-0.139081	-0.133237	0.165604	0.0672433	1.03892	0.663693	0.387415	-0.537194	-0.0916647	0.4614	0.0655787	0.967085	0.0309485	-0.228986	0.565362	-0.0482195	-0.0311341	-1.2367	-0.694262	0.807825	0.38503	0.575735	1.11767	3.04211	0.663566	0.997722	0.830687	0.337	-0.018	-0.122	-0.076	0.032	0.213	0.062	0.431	11.2593	low
GSM52586	Detwiller	0.898808	1.02841	-0.143999	1.32124	1.7489	0.267682	0.473588	0.396006	0.229841	-0.0293964	0.103397	-0.0613475	1.13139	0.18017	0.744973	0.674894	-0.229645	-0.0698047	-0.151034	0.176971	0.283046	0.691723	1.31973	-0.136978	0.18432	0.264499	0.028001	0.0386168	-0.266188	0.494852	0.803025	0.252125	2.05986	2.47284	1.39649	1.41223	1.6541	-0.341	0.009	-0.412	-0.123	-0.169	0.144	0.238	-0.039	5.74739	low
GSM52587	Detwiller	-0.373104	-0.0334109	-0.377437	-0.0854846	-0.306038	0.0207632	0.26239	0.0593805	-0.248662	-0.239543	-0.151528	0.266287	-1.35835	0.0526697	-0.0145066	-0.000255292	0.306935	-0.344889	0.113519	-0.119171	-0.184159	-0.599364	1.7147	0.102047	-0.0635317	0.11687	-0.252983	1.43626	0.470304	0.859724	0.720685	0.873117	-0.149326	-0.745842	-0.358216	0.0468081	-0.16365	0.499	0.272	0.137	0.275	0.044	0.571	0.573	0.278	11.973	high
GSM52588	Detwiller	-0.791882	-0.169262	-0.6918	-0.132678	-0.06353	0.0344044	-0.0831739	0.369224	-0.139982	0.369998	0.152336	0.30539	1.21097	-0.271985	0.254603	-0.29985	0.284472	-0.0315635	0.273603	0.280011	-0.0398301	-1.03175	1.77291	0.0383694	0.209695	-0.00462937	-0.128204	0.953574	1.05442	0.559132	0.1432	0.434622	-0.517667	-2.62993	-0.318011	-0.30352	-0.402087	0.011	0.348	0.12	-0.036	-0.092	-0.12	0.722	0.596	13.265	high
GSM52589	Detwiller	-0.406415	-0.186144	-0.244745	-0.227482	-0.321177	-0.138047	-0.187007	0.0823388	0.0750195	-0.0137499	-0.0624745	-0.742425	0.847459	-0.21906	-0.412537	-0.323805	0.0286469	0.24987	-0.917159	-0.0369712	-0.0734866	-0.435287	-0.898981	-0.0316401	0.219169	0.0743902	0.165156	-0.903615	0.566738	0.336281	0.92118	0.197235	0.0242421	-0.996918	-0.00279873	-0.405091	-0.238565	-0.076	0.153	-0.116	-0.108	-0.027	-0.323	-0.149	1.134	12.4624	high
GSM52590	Detwiller	-0.624836	-0.3231	-0.335263	-0.207468	0.0334412	-0.134943	-0.288281	-0.137606	0.0595327	0.096724	0.072535	0.338555	0.184963	-0.0429199	-0.0869626	-0.313614	0.124469	0.405554	0.250049	0.482888	0.597893	-0.126027	-0.953509	0.0972285	0.264469	0.0270161	-0.0850411	0.393194	-0.228003	0.450386	0.73357	0.455344	-0.702117	-3.30259	-0.615062	-0.716228	-0.310559	0.15	0.062	0.114	0.109	0.074	-0.182	0.356	-0.112	14.5969	high
GSM52591	Detwiller	-0.250604	-0.222969	-0.0307051	0.0358985	0.131996	-0.142305	-0.133832	0.172394	0.0893687	0.18378	-0.283315	-0.147845	-0.372136	-0.0629178	-0.533141	-0.0773352	0.00507054	0.0252301	-0.266879	0.379205	0.31725	0.566128	-0.105372	0.234073	0.545943	-0.189556	0.443817	-0.291991	0.50225	0.476775	0.775591	0.269335	0.502733	0.771993	0.0462584	0.423916	0.604706	-0.108	0.088	0.026	0.019	0.06	0.289	0.604	0.165	12.5513	high
GSM52592	Detwiller	-0.446047	-0.43929	-0.00750772	-0.369876	-0.344453	0.262661	-0.195624	-0.0702436	0.426385	0.16993	0.0465128	-0.560263	0.451682	-0.0155834	-0.226918	-0.167343	0.389685	-0.254711	-0.20032	-0.0344168	-0.205542	0.0930276	1.18341	-0.0263591	0.496211	-0.360894	0.386323	1.04862	1.27585	0.380794	0.972608	0.490767	0.00285288	3.30205	0.152851	0.140114	0.164186	-0.138	0.103	0.124	0.225	0.01	0.108	0.462	0.098	9.97635	low
GSM52593	Detwiller	-0.577714	-0.368477	-0.232485	-0.286614	-0.276099	0.346897	0.148334	-0.142795	-0.022722	0.343276	-0.142641	-0.126856	-0.0107747	-0.0287107	-0.124177	-0.0223812	-0.0434614	-0.226258	-0.515151	0.401253	0.074038	-0.0754218	-1.33594	0.0195974	0.373991	-0.289401	0.228891	-0.537467	0.278552	0.178196	0.0961268	0.081313	-0.229972	1.99615	-0.130555	0.0352249	0.302798	0.111	0.37	0.091	0.238	0.259	0.222	0.795	-0.188	8.91363	low
GSM52594	Detwiller	-0.741767	-0.309749	-0.48002	-0.38972	-0.345479	0.584554	0.0217523	-0.0258106	-0.0250527	0.387009	-0.245665	-0.346808	0.52589	0.339931	-0.541099	-0.189296	0.0164437	-0.189262	-1.18012	-0.0976101	-0.0206218	0.604136	0.475281	-0.165114	0.330311	-0.649017	0.0854646	0.647762	1.2299	0.11849	0.213695	0.0114135	0.184891	5.59606	0.107505	0.236909	0.334387	0.083	0.375	0.139	0.314	0.357	0.047	0.88	-0.156	9.33485	low
GSM52595	Detwiller	-0.530605	-0.146577	-0.426698	-0.347372	-0.341788	0.302497	0.258593	0.0953537	-0.125924	0.618481	0.04087	-0.158921	0.585041	0.033203	-0.0870525	-0.524851	0.237403	0.01244	-0.627491	0.0234372	-0.0436506	0.0578888	0.996985	0.021613	0.284435	-0.223312	0.116997	0.433693	1.74738	0.296246	0.304206	0.0453642	-0.469149	2.34915	-0.140041	0.116101	0.0378983	0.154	0.547	0.216	0.309	0.37	0.026	1.093	-0.139	9.43275	low
GSM52596	Detwiller	-0.848085	-0.177577	-0.745009	-0.255429	-0.26772	0.507771	0.329255	0.130159	0.0852807	1.01109	-0.118553	-0.341384	0.262397	-0.146759	0.114017	0.234076	-0.163826	0.000700712	-0.325431	0.195824	-0.136294	-0.750372	-1.45237	-0.268457	0.027198	-0.00181633	0.0672433	-1.20199	1.16585	0.226544	0.292212	0.0262561	0.473231	3.0695	0.0486736	-0.263674	-0.0255632	0.285	0.583	0.164	0.34	0.257	-0.316	0.869	-0.247	8.53106	low
GSM52597	Detwiller	0.0336292	0.469176	-0.483941	0.244855	0.958505	0.314437	0.255721	0.0126409	0.327311	0.458395	0.024773	0.682076	0.466739	-0.0132015	0.300283	0.568901	-0.0984942	0.063139	0.0882293	0.951773	0.223142	0.668785	-0.0950562	-0.0577274	0.4117	0.532028	0.27184	1.02631	1.26989	0.476128	0.158545	0.455797	1.25353	0.589921	0.899236	1.30804	1.44808	-0.025	0.308	0.06	0.001	-0.009	0.081	0.773	0.418	8.99607	low
GSM52598	Detwiller	-0.301488	0.0524072	-0.393217	0.0626	0.17217	0.135416	0.0379048	-0.66066	0.215966	0.371645	0.122336	0.143559	1.0475	-0.0795245	-0.380564	0.257278	-0.101812	0.27493	0.158767	0.200532	0.0391656	0.692682	1.28584	-0.302603	0.157002	-0.21696	0.287369	-0.782943	0.964946	0.454987	0.891867	0.610972	0.564968	-0.126319	0.900429	0.834509	0.897368	-0.038	-0.144	-0.041	0.053	-0.05	0.318	-0.268	0.194	12.5758	high
GSM52599	Detwiller	-0.635736	-0.330879	-0.33873	-0.476876	-0.60778	0.286955	-0.0127945	0.104284	0.46012	0.11583	-0.216966	0.341177	-1.62292	-0.311007	-1.45505	-0.480981	0.0504186	-0.146516	-0.82703	0.118714	0.336973	0.197233	-0.382435	-0.121088	0.50009	0.124693	0.477828	-0.754842	0.331578	0.174232	0.660167	0.142707	-0.80412	-0.555749	-0.381975	-0.295705	0.342314	-0.028	0.082	0.12	0.08	0.201	-0.189	-0.584	0.289	10.8265	low
GSM52600	Detwiller	-0.547929	-0.141753	-0.451307	-0.46476	-0.330225	0.467384	0.331831	0.212021	0.0493313	0.133806	-0.130798	-0.659133	0.255944	-0.169416	-0.747017	-0.0297569	-0.179899	-0.0650478	0.325815	-0.732745	-0.186247	-0.41847	0.0935824	-0.106368	0.0692563	0.0235606	-0.0409175	-0.785423	0.52446	0.124	0.555584	0.525665	0.0426049	-2.84543	0.0113661	0.198022	0.390845	0.14	0.189	0.178	0.205	0.119	0.019	0.027	0.493	12.7523	high
GSM52601	Detwiller	-0.236383	0.382455	-0.687598	-0.317101	0.740488	0.588897	-0.0159294	0.439792	0.0492788	0.38193	0.0570257	0.0773385	0.589343	0.278042	-0.985703	0.635493	0.015332	-0.112663	0.0914671	0.46347	-0.00408254	1.08429	-1.31384	-0.19417	0.360009	-0.050682	0.0529693	-0.23992	-0.083014	0.249266	0.0548008	0.295463	1.11729	4.49024	0.956873	1.33044	1.05428	0.166	0.478	0.136	0.299	0.253	0.258	0.89	0.024	10.6037	low
GSM52602	Detwiller	-0.693482	-0.0683406	-0.694601	-0.0545459	-0.0427756	0.206442	0.057265	-0.37996	0.175921	0.0657932	0.167396	-0.717872	0.03332	-0.180456	-0.735166	-0.491862	-0.24349	0.400144	-0.25331	0.176715	-0.0557893	0.228071	-0.0073687	0.492252	-0.178328	0.0849299	-0.114755	0.756036	0.246284	0.124881	0.750936	0.136167	-0.769976	-1.37429	-0.315583	-0.32073	-0.382083	-0.056	0.012	0.022	0.069	0.178	-0.767	-0.552	-0.478	12.2254	high
GSM52603	Detwiller	-0.807853	-0.262637	-0.605795	0.0616117	-0.164547	-0.0762145	0.208557	-0.426195	0.087477	-0.0457669	0.130157	-0.205699	-0.700158	-0.305014	0.668675	-0.50799	-0.245816	0.126458	0.0811223	0.50933	0.0510435	0.0257879	0.0987405	0.349367	-0.332758	-0.0956605	0.349447	0.76926	0.15839	0.390384	0.834206	0.351449	-0.564526	-6.59906	-0.270331	-0.536033	-0.555991	-0.451	-0.289	-0.288	-0.462	-0.536	-0.667	-0.648	-0.117	12.3156	high
GSM52604	Detwiller	-0.567481	-0.314214	-0.281408	-0.0447626	-0.368536	0.358583	-0.18014	-0.484963	-0.0104452	0.00855136	-0.0708448	-0.386347	0.0118104	-0.265644	-0.502157	-1.05853	-0.0635266	0.0902192	-0.00069465	-0.333934	-0.0558178	-0.322109	-1.07878	0.111067	-0.38673	0.0829089	-0.135714	0.0989527	-0.431992	0.0785293	0.801766	0.239637	-0.979733	0.888748	-0.370909	-0.677185	-0.50168	0.053	0.038	-0.041	0.018	0.124	-1.142	-0.974	-0.465	13.4685	high
GSM52605	Detwiller	-0.54338	-0.172078	-0.412558	0.0742953	-0.132286	0.140103	-0.0950037	-0.19462	0.025349	-0.0754141	-0.0086686	0.521396	-1.60249	-0.165691	-0.362201	-0.0632193	0.0105896	-0.108936	0.00812498	0.273639	-0.0877197	-0.152372	0.00442122	0.273612	-0.178936	0.0978733	-0.213571	1.78836	0.121505	0.438768	0.994843	0.590705	0.0589589	0.935265	-0.117214	-0.324802	0.107714	0.226	0.166	-0.045	0.273	0.131	-0.296	-0.304	0.161	13.6179	high
GSM52606	Detwiller	-1.05532	-0.536236	-0.576764	-0.401904	-0.872705	-0.108885	0.0367587	0.247689	-0.375061	-0.251007	-0.24337	-0.680565	-0.431288	0.0612623	-0.753018	-0.242293	0.0429943	-0.480277	-0.192106	-0.47343	-0.316164	-0.683853	-1.28805	-0.215393	0.00451746	-0.28874	-0.441319	0.589905	-0.559552	0.264664	0.499109	0.552667	-1.28535	-2.74235	-0.956843	-0.813902	-0.711205	0.09	0.113	0.029	-0.135	-0.024	-0.109	-0.113	0.449	11.7411	high
GSM52607	Detwiller	-0.741381	-0.239291	-0.557878	-0.361274	-0.584166	0.219884	0.284673	-0.0800447	-0.531124	-0.0877431	-0.176807	0.529283	0.358115	-0.0894769	-0.573136	-0.345696	0.00185068	-0.347228	0.0379306	-0.416328	-0.31029	-0.500956	-1.35658	-0.20176	-0.258148	-0.500584	-0.264453	-0.720128	-1.52536	0.263971	0.228321	0.524642	-0.961399	-1.36031	-0.507333	-0.35224	-0.825597	0.006	-0.2	-0.007	-0.175	-0.08	-0.076	-1.207	-0.154	9.0257	low
GSM52608	Detwiller	-0.982636	-0.516047	-0.518432	-0.172411	-0.716751	-0.107018	-0.0417454	0.275787	-0.0627734	-0.00161559	0.204891	-0.0219813	1.74764	0.111314	0.167654	-0.446434	0.357907	0.0812517	0.0146294	-0.48899	-0.371806	-1.27958	-1.10383	-0.199435	-0.360791	-0.309331	-0.538462	-1.12843	-0.837714	0.214631	0.351737	0.687486	-0.993312	-3.44665	-0.517713	-1.02639	-0.887031	0.049	-0.223	0.019	-0.288	-0.18	-0.669	-0.703	-0.164	9.31553	low
GSM52609	Detwiller	-0.924863	-0.218226	-0.785152	-0.3431	-0.851691	0.000478611	0.450402	-0.0496045	-0.440792	-0.0859264	0.0158019	-0.063557	-0.718441	0.057687	0.130528	-0.402618	0.201997	-0.206794	0.038316	-0.677437	-0.422579	-0.843428	-1.58353	-0.0289421	-0.436757	-0.490158	-0.590675	0.578334	-0.766441	0.235247	0.508162	0.484126	-0.698582	-0.0373872	-0.866703	-1.05293	-0.602021	-0.001	-0.198	-0.02	-0.198	-0.151	-0.601	-0.789	-0.064	9.99953	low
DG01039447300103	Henderson	-0.882419	-0.421461	-0.512176	-0.410753	-0.559227	0.802012	0.350818	-0.335747	-0.225568	0.120871	-0.133766	-1.05846	-0.401633	0.190753	1.50618	-0.678326	-0.280084	-0.932335	-0.546535	-0.558148	-0.521847	0.232837	-1.31664	-0.406733	-0.580527	-0.299179	-0.483965	-0.698158	0.929774	0.340188	0.779816	0.258835	-0.671274	3.8172	-0.702729	-0.6745	-0.606533	-0.058	-0.001	-0.065	-0.079	-0.06	-0.447	-0.352	-0.497	13.422	high
DG02043833Rescan300103	Henderson	-0.933812	-0.569438	-0.40486	0.112772	-0.475134	0.372077	-0.0329248	-0.645817	0.123488	-0.018837	-0.269668	-0.100426	-0.133705	0.0319461	0.559733	-0.111483	0.234059	0.0973658	-0.387336	0.0852321	0.117473	-0.50914	-0.182159	-0.0421035	-0.238973	-0.0714785	-0.170684	-0.772621	-0.762042	0.892601	0.171665	0.672925	-0.568932	-0.465263	-0.581959	-0.370156	-0.561339	0.513	-0.154	0.09	0.095	0.113	0.22	-0.218	0.518	14.2169	high
DGOXF2589110303	Henderson	-0.515918	-0.310474	-0.228272	0.166087	0.409091	-0.0901314	-0.377512	0.106988	-0.00996946	0.0317158	0.152745	0.430081	0.0264993	-0.134061	0.348128	0.731555	0.131217	0.716865	0.0399632	0.108289	0.343361	0.233504	-0.0768797	0.0279512	0.648849	0.157679	0.505205	1.52296	0.812443	0.497299	0.171665	0.588672	0.840012	4.22626	0.574844	0.694955	0.311084	-0.02	0.072	0.196	0.123	0.157	0.209	0.015	0.404	12.7057	high
DGOXF2916110303	Henderson	-0.620954	-0.488421	-0.147259	-0.122553	0.00920453	0.195509	0.0769356	0.0720791	0.182638	0.144295	-0.338937	0.539285	-0.128181	-0.114758	0.0373861	-0.0859431	-0.23909	0.112347	-0.315167	0.725059	0.0848815	0.0772455	-0.178529	-0.0497508	0.47601	0.54397	0.378391	-0.161355	1.28439	0.611871	0.171665	0.565124	0.731133	0.877574	0.474702	0.568891	0.663029	-0.08	0.246	0.117	0.139	0.017	0.355	0.44	-0.1	10.673	low
DGSTM_104_MSS180903	Henderson	-0.970938	-0.590653	-0.422539	-0.141425	-0.559309	0.249199	-0.0644754	-0.281557	-0.000663926	0.144576	-0.268948	-0.236451	-0.122656	0.24232	0.0740925	0.0265692	-0.175706	-0.0815001	-0.299155	-0.333696	0.0418183	-0.323762	-1.15509	-0.0784503	-0.222867	-0.12022	-0.411187	-1.07714	-0.125787	0.227294	0.343749	0.610329	-0.649775	2.07517	-0.44758	-0.247828	-0.719249	-0.18	-0.401	0.085	0.041	0.241	0.779	-0.695	0.095	13.2152	high
DGSTM_124_WLS151003	Henderson	-0.627836	-0.268649	-0.399097	0.49079	0.888256	-0.0619895	-0.0476503	0.0797848	0.0168687	-0.315532	0.3049	0.185502	-0.0563649	0.352934	0.366743	0.565505	-0.0228245	0.0948692	0.0244682	0.989115	0.270305	1.13156	3.32474	0.0422977	-0.0366443	0.0585645	0.248289	2.18591	-0.446133	0.829583	0.790968	0.779621	0.804135	-1.50503	0.737182	0.739894	0.683073	0.142	0.197	0.012	0.088	-0.002	0.193	0.739	-0.089	13.9806	high
DGSTM_126_MSS260903	Henderson	-1.08049	-0.580585	-0.555446	-0.209186	-0.473843	0.0174152	0.241233	0.263046	-0.170842	-0.162176	0.19101	-0.140091	-0.304958	0.063364	-0.53487	-0.0715969	-0.0595584	-0.470413	0.801812	-0.366798	-0.305725	-0.737391	-1.44733	0.113644	-0.340495	-0.456766	-0.392471	-0.00631526	-0.54905	0.205448	0.26755	0.885853	-0.802488	-5.32088	-0.791951	-0.751123	-1.07495	0.13	-0.007	0.083	0.013	-0.029	-0.098	-0.315	-0.242	11.575	low
DGSTM_128_MST170903	Henderson	-0.950953	-0.562951	-0.431113	-0.21337	-0.644437	-0.0258051	0.284042	-0.236518	-0.517895	0.0397486	0.0738368	-1.16533	-0.478972	-0.12159	-0.794139	-0.642393	-0.440144	-1.02562	-0.317971	-0.66659	-0.349508	-0.579104	-0.41087	-0.429855	-0.587973	-0.280455	-0.247082	0.173175	0.0948937	0.123492	0.977891	0.331574	-0.789495	-9.17749	-0.702842	-0.763068	-0.791214	-0.244	0.018	-0.063	-0.112	-0.29	-0.519	-0.421	-0.202	12.6212	high
DGSTM_133_WLS300903	Henderson	-0.60213	-0.371904	-0.255807	-0.0405525	0.240496	-1.16282	-0.602646	0.395171	-0.0039807	-0.778821	-0.0653224	-0.731239	9.37358	-0.5523	-0.644384	-0.184429	0.805261	-0.34838	1.68785	1.40138	-0.278509	1.93665	-0.372751	-0.345656	-0.40033	0.240252	0.172361	1.46684	-0.347797	0.984254	0.48149	0.956604	-0.242877	-3.95129	0.940397	-0.600278	0.278977	-0.626	-0.621	-0.572	-0.575	-0.779	0.633	0.609	-0.575	13.3428	high
DGSTM_134_LMS260903	Henderson	-1.07415	-0.583419	-0.545259	-0.148454	-0.385184	0.241466	0.0631379	-0.113149	0.0540979	0.258514	-0.17859	-0.0737659	-0.0922728	-0.0430548	-0.366334	-0.472302	-0.227118	0.455622	0.113031	-0.291972	0.0386112	-0.0107293	-0.156747	-0.221499	-0.337396	-0.187047	0.178804	-0.279718	-0.109434	0.314184	0.171665	0.696255	-0.744892	-2.50205	-0.313012	-0.371629	-0.472206	-0.166	0.246	0.066	-0.057	-0.115	-0.213	0.143	0.196	12.3879	high
DGSTM_136_MSS180903	Henderson	-1.04791	-0.557857	-0.544507	-0.25011	-0.519437	0.33406	0.195837	-0.00341762	-0.477542	-0.0100567	0.219113	-0.643207	-0.277336	-0.0397457	-0.701277	-0.451967	-0.383531	-0.405796	-0.540245	-0.420847	-0.454039	-0.483153	-1.55079	-0.0777021	-0.354332	-0.461203	-0.313807	0.261531	-0.899219	0.284822	0.419935	0.805149	-0.791927	-1.22421	-0.646794	-0.653933	-1.00647	0.153	-0.15	0.077	0.068	-0.032	-0.324	-0.55	0.065	10.9092	low
DGSTM_137_MSS151003	Henderson	-0.975064	-0.515413	-0.510723	0.0126546	-0.13525	0.591025	0.503601	0.0492712	-0.331867	-0.237621	0.0793562	-0.490212	-0.128181	0.151402	-0.53071	-0.130749	0.078283	0.225598	-0.345117	-0.213901	-0.184429	-0.488555	-0.180344	0.104866	-0.496547	-0.0978051	-0.0225153	1.11842	0.413708	0.295509	0.843567	0.576743	-0.398176	-0.589292	-0.397622	-0.54947	-0.831084	0.05	0.01	0.059	0.108	0.033	-0.146	-0.276	-0.074	14.9415	high
DGSTM_13_MLS300903	Henderson	-0.75112	-0.492043	-0.287863	-0.0648742	-0.0368826	0.0750025	0.362709	-0.452685	0.156178	-0.114167	-0.133507	-0.515479	-0.183423	0.196859	-0.50581	-0.0456619	-0.41903	-0.167438	-0.255497	0.530391	-0.0306951	1.3999	-0.617798	0.209466	-0.122541	0.86458	-0.270604	1.59131	2.19128	0.603103	0.882554	0.227885	-0.10989	3.68037	0.55318	0.279206	1.02278	0.152	0.183	-0.077	0.139	0.145	-0.191	0.569	-0.443	12.0347	high
DGSTM_15_MSS160903	Henderson	-0.965226	-0.51827	-0.496617	0.678482	-0.181737	0.119634	0.152974	0.0194562	0.0555758	0.3099	0.737072	0.727826	0.217087	-0.136334	0.357785	0.235798	0.27434	0.556348	0.110971	-0.123721	-0.143238	0.0468088	0.0465514	0.641742	-0.183537	-0.0296555	0.0414396	-0.728721	-0.360755	0.240939	0.908802	0.253215	-0.634397	-7.31475	-0.0820611	-0.189524	-0.490559	0.052	-0.168	0.124	0.114	0.171	-0.254	-0.54	-0.341	11.9041	high
DGSTM_183_WLS201103	Henderson	-0.841058	-0.46011	-0.423277	-0.107306	0.0756157	-0.337067	0.227657	0.0343305	0.141756	-0.388304	-0.0335714	1.3708	-0.0812242	0.0618995	0.00814306	0.261282	0.163375	0.22446	0.636828	0.834908	0.0461754	-0.09679	3.332	0.108072	0.00988874	0.972797	-0.036779	1.90973	0.586928	0.989621	0.972711	0.962929	-0.128855	-3.98879	-0.196424	-0.282007	0.0517584	0.055	0.195	-0.169	-0.166	-0.183	0.12	1.507	-0.584	12.1502	high
DGSTM_19_PMS060104	Henderson	-0.862977	-0.547968	-0.35001	0.0598805	-0.138785	-0.54785	0.177651	0.134133	-0.130586	-0.0548399	-0.0361267	-0.14529	0.360718	0.0075577	-0.375983	-0.165467	0.351134	-0.105062	-0.122808	-0.14243	-0.108414	-0.190131	-0.174899	0.491232	-0.109404	-0.139713	-0.222244	-1.00212	0.992074	0.714099	0.769585	0.473082	-0.462083	-1.06486	-0.0642296	-0.325792	-0.125351	-0.171	0.36	-0.015	0.065	-0.072	-0.153	1.086	-0.211	14.5097	high
DGSTM_210_MST180903	Henderson	-1.00847	-0.540002	-0.52052	0.0578004	-0.349906	0.293003	0.318347	-0.15267	-0.303433	0.0445916	0.27072	0.0725215	-0.0701756	0.125263	-0.295646	-0.163282	0.0228963	0.0639344	-0.169744	-0.0996881	-0.214352	-0.402109	-1.12967	0.13811	-0.233194	-0.0764799	-0.377508	0.0203582	-0.255272	0.361497	0.175013	0.50479	-0.564599	-4.08979	-0.429961	-0.358755	-0.840842	0.109	0.115	0.064	0.047	0.014	-0.774	-0.173	-0.249	11.3538	low
DGSTM_221_LMS170903	Henderson	-0.0606106	-0.0362251	-0.027095	0.149849	1.28209	-0.240335	-0.134631	0.158399	0.134617	-0.00626526	-0.0413439	0.280446	-0.205521	0.136816	-0.148284	1.42665	0.0515297	0.47691	0.714148	0.278546	0.269266	0.823941	0.0792243	-0.309182	0.774001	-0.12218	0.908647	-0.798183	0.240303	0.662816	0.171665	0.748658	2.09882	2.24294	1.68773	1.54601	2.14515	-0.284	-0.383	-0.006	0.006	-0.038	0.638	-0.12	0.202	12.0385	high
DGSTM_227_LMS191203	Henderson	-0.595864	-0.537488	-0.0648614	0.0819915	-0.0334788	-0.10079	0.0331511	-0.190898	0.664789	-0.135698	-0.0305752	0.738113	0.0900285	-0.0952969	0.245672	-0.231946	-0.172531	0.410401	0.357576	1.66712	0.367865	0.849685	-0.0369461	0.0906556	0.378265	0.472204	0.136735	-0.260824	0.618718	0.0841825	0.540524	0.451305	-0.479601	4.21501	0.0177692	-0.228915	0.25662	0.067	-0.02	0.242	0.282	0.236	0.003	-0.409	0.127	12.8748	high
DGSTM_254_PMS070104	Henderson	-0.961041	-0.559013	-0.446698	-0.0947253	-0.437067	0.0145217	-0.366996	-0.171448	0.123449	0.723656	-0.357501	-0.315034	-0.0784621	-0.252801	0.395007	-0.227485	0.022196	0.19819	-0.136122	-0.2107	0.0156701	-0.398375	-0.750305	-0.150266	-0.0897027	-0.268957	0.232223	0.739986	0.546581	0.344949	0.500378	0.452362	-0.352369	5.38932	-0.239797	-0.320542	-0.52792	0.234	0.039	0.2	0.203	0.236	-0.318	-0.296	0.21	13.1639	high
DGSTM_315_MLS300903	Henderson	-0.657318	-0.436736	-0.245091	-0.169951	0.394021	0.0908298	0.119465	-0.411687	-0.153511	-0.465825	-0.113378	0.0542871	-0.108846	0.11183	-0.42986	-0.178687	-0.188428	-0.171052	0.041883	0.408851	-0.187223	-0.00985995	0.0102481	0.0313439	-0.427714	0.0577478	-0.302467	-1.02824	-0.345451	0.836789	0.999883	0.704184	-0.707025	-3.68851	-0.265109	-0.362848	-0.249438	-0.021	-0.072	-0.136	-0.039	-0.073	-0.651	-0.554	-0.878	13.5066	high
DGSTM_370_LMS080104	Henderson	-0.796327	-0.573967	-0.247067	-0.0077591	-0.334392	0.281784	0.0377215	0.0984192	0.400002	0.202544	-0.177591	0.157294	-0.0729378	-0.173057	-0.451388	0.141158	-0.222444	0.0284857	-0.155591	-0.33009	-0.10729	-0.209002	-0.677699	0.00520655	0.689498	-0.193397	0.678804	1.11675	0.486372	0.214088	0.317731	0.256664	1.18378	2.48723	0.179938	0.0569466	0.0698082	0.011	0.106	0.147	0.163	0.207	-0.099	0.015	0.242	11.8248	high
DGSTM_37_MLS300903	Henderson	-0.894851	-0.457135	-0.486352	-0.426159	0.248885	0.31043	0.379963	-0.271765	-0.32169	-0.205796	-0.225293	-0.729897	-0.393346	-0.0281658	-0.812202	-0.722754	-0.315382	-0.908638	-0.353768	0.172481	-0.376347	-0.679678	-1.30938	0.182262	-0.556371	-0.575965	-0.609151	0.308765	-0.127563	0.285389	0.822611	0.304136	-0.769825	3.17176	-0.756088	-0.666462	-0.836945	0.041	-0.084	-0.208	-0.101	0.013	-0.612	-0.457	-0.736	11.4859	low
DGSTM_411_LMS080104	Henderson	-0.576264	-0.517849	-0.0649061	0.244079	0.706557	0.491256	-0.193083	-0.141262	0.353332	0.691244	-0.0620424	0.421084	0.200514	-0.0153128	0.801738	0.815662	-0.365878	0.275608	-0.443541	0.17415	0.139421	0.291616	0.00480262	0.150901	0.562287	0.0161618	1.16599	-0.587018	0.288258	0.134159	0.978884	0.0197071	1.19129	2.11457	1.15821	0.842807	1.55341	0.132	-0.249	0.085	0.173	0.247	-0.178	-0.672	-1.363	10.1771	low
DGSTM_425_PMS080104	Henderson	-0.188663	-0.05302	-0.150714	0.417675	1.23915	-1.47888e-05	-0.082871	0.0431957	0.0851694	-0.100554	-0.12883	-0.00355237	-0.205521	0.157454	-0.291948	0.338643	-0.345089	-0.217097	-0.411987	1.21299	0.122557	0.654211	0.344238	-0.172781	0.6195	1.24565	0.443472	0.689417	2.05828	0.626288	0.196691	0.325055	2.14182	3.36668	0.656782	1.09482	1.30581	-0.119	0.173	-0.086	0.105	-0.012	0.455	1.075	-0.06	9.84645	low
DGSTM_42_MLS170903	Henderson	-0.952582	-0.533966	-0.465129	0.0558135	0.0710263	0.401767	0.483586	-0.340013	-0.092236	-0.245256	0.331177	-0.0638656	-0.0536028	-0.27625	-0.340727	-0.0586234	-0.030136	0.0690094	0.00293056	0.442225	-0.0592718	0.588528	-0.129519	0.533623	-0.204967	0.139688	-0.129735	1.26401	-0.138879	0.619019	0.76573	0.371864	-0.267129	-3.20597	0.185791	-0.171428	0.0223699	0.021	-0.03	-0.012	0.039	-0.056	-0.481	-0.19	-0.639	13.5594	high
DGSTM_66942_MST161003	Henderson	-0.925034	-0.509844	-0.461321	-0.100127	-0.312731	-0.031173	-0.0924724	0.354947	-0.264346	-0.0896851	0.178241	-0.0124336	-0.349152	-0.0638357	-0.57188	-0.296557	-0.284411	-0.335055	0.199915	-0.315639	-0.0535766	-0.344389	-0.323742	-0.295617	-0.324597	-0.231795	-0.229923	0.0748165	-0.708644	0.261413	0.299511	0.711397	-0.586398	-4.84509	-0.406266	-0.389119	-0.444473	-0.193	0.066	0.038	-0.053	-0.129	-0.199	-0.071	0.254	12.7397	high
DGSTM_79_MST170903	Henderson	-1.01448	-0.585612	-0.47652	-0.330539	-0.468445	0.361805	-0.542041	-0.0959691	-0.561207	0.252524	0.307909	-0.914275	-0.465162	-0.169141	-0.960794	-0.330408	-0.20795	-1.13307	-0.661223	-0.701293	-0.354142	-0.71427	-1.41284	-0.361556	-0.488505	-0.129014	-0.593938	-1.00713	0.421823	0.0551684	0.171665	0.0588258	-0.737506	-4.82389	-0.720205	-0.777931	-0.601423	-0.202	0	0.006	-0.064	-0.04	-0.293	-0.06	-0.346	12.5049	high
NP03_65_MLS	Henderson	-0.791803	-0.413376	-0.420475	-0.209245	-0.100514	-0.00979227	0.0525868	-0.300503	-0.266147	-0.528653	-0.0514288	-0.701172	-0.332579	-0.0204155	-0.77607	-0.383029	0.30222	-0.613178	-0.531125	0.227163	-0.252658	0.676828	-0.314666	0.259313	-0.393722	0.146154	-0.22833	1.65911	-0.232659	0.505763	0.477554	0.282421	-0.305512	3.01938	0.0128831	-0.436848	-0.103583	-0.014	-0.144	-0.204	-0.061	-0.101	-0.487	-0.376	-0.588	13.0522	high
NP04_1293_MSS	Henderson	-1.0773	-0.616344	-0.512178	-0.0384745	-0.333429	0.107366	0.00646797	0.02863	-0.0221543	0.0539198	0.464222	-0.249827	-0.125418	0.214639	-0.202597	-0.578373	0.240765	0.117094	0.0959023	-0.521082	-0.147383	-0.454486	1.04308	0.241078	-0.626128	-0.329571	-0.295982	-1.03547	-0.108591	0.267017	0.252209	0.162812	-0.571946	-1.78058	-0.423636	-0.368329	-0.689134	-0.001	-0.3	0.112	0.01	0.023	-0.459	-0.333	-0.198	11.504	low
NPARMS_01_S_885240804	Henderson	-1.05476	-0.571451	-0.537013	-0.474367	-0.421359	0.242361	0.127187	-0.218718	-0.716901	0.487638	0.0315578	-1.27563	-0.404395	0.213848	-0.859006	-0.679412	-0.135822	-0.703783	-0.571259	-0.69862	-0.410141	-0.77072	0.278892	-0.289749	-0.563556	-0.138904	-0.557018	-0.829858	-1.16044	0.122033	0.405459	0.0318028	-0.50343	0.140086	-0.673586	-0.753014	-0.644718	-0.035	-0.469	-0.299	-0.117	0.013	-0.07	-0.826	-0.616	11.2708	low
NPARMS_02_S_0863010904	Henderson	-1.03282	-0.585704	-0.496799	-0.266467	-0.3615	0.255696	0.192858	-0.290465	-0.390156	0.435262	0.0450192	-0.543074	-0.238666	-0.0166868	-0.540904	-0.0576855	-0.0176633	0.0579645	-0.206579	-0.187645	-0.0226659	-0.57864	2.11765	-0.117005	-0.673918	0.26292	-0.200996	-1.57449	-0.377488	0.232611	0.993956	0.144219	-0.491772	-3.71272	-0.282254	-0.449759	-0.637618	-0.171	-0.241	-0.18	-0.042	-0.2	-0.64	-0.647	-0.484	12.665	high
NPARMS_96_S_592240804	Henderson	-1.17148	-0.596122	-0.639287	0.134487	-0.26939	0.573639	0.195066	0.501725	-0.588249	0.525061	0.0166036	-0.304716	-0.0756999	0.100342	-0.348099	-0.346793	0.281047	-0.137711	0.00316726	-0.513791	-0.371214	0.11905	-0.145856	-0.0583049	-0.775024	0.146796	-0.240449	-0.751505	-0.255908	0.116581	0.171665	0.0255054	-0.439667	0.539269	-0.397734	-0.621293	-0.732921	-0.119	-0.595	-0.053	-0.127	0.082	-0.29	-0.786	-0.892	12.8069	high
NPERMS_00_S_1173010904	Henderson	-0.925047	-0.50715	-0.464329	0.173915	0.196618	0.539832	0.211462	-0.253018	0.000998245	0.599362	0.065243	0.396911	-0.0425542	-0.183972	-0.0183816	-0.111971	-0.0461188	0.186214	0.0461631	-0.15254	0.0375255	-0.0867152	1.42063	0.119831	-0.31578	-0.110161	-0.0925506	-1.07214	-0.62843	0.0547407	0.314502	0.0374095	-0.447655	-6.4504	-0.219901	-0.345094	-0.530824	-0.137	0.104	-0.088	-0.145	-0.104	-0.776	-0.334	-0.435	12.5155	high
NPERMS_03_S_187010904	Henderson	-1.03108	-0.561767	-0.521457	-0.324228	-0.338913	0.720338	0.779065	-0.300961	-0.466663	0.800297	0.226055	-0.678969	-0.291147	-0.253131	-0.723533	-0.55072	-0.248873	-0.558113	0.398091	-0.638658	-0.340261	-0.469261	-0.287439	-0.1364	-0.594317	-0.323401	-0.478163	-1.73953	-0.762398	0.0166581	0.377374	0.0197071	-0.646551	-6.59036	-0.459574	-0.578215	-0.547626	-0.185	-0.181	-0.111	-0.097	-0.164	-0.974	-0.713	-0.672	12.9186	high
NPERMS_03_S_3039240804	Henderson	-1.05085	-0.626053	-0.471997	-0.118202	-0.289968	0.335317	0.249477	-0.228085	-0.464807	0.82109	-0.122795	-0.410386	-0.23038	0.257141	-0.560877	-0.473869	0.124402	-0.286303	-0.0175092	-0.486517	-0.346194	-0.581452	-0.24569	0.0780032	-0.460378	-0.443057	-0.423642	-1.2583	-0.960505	0.0330386	0.191065	0.0197071	-0.589264	-1.98008	-0.498993	-0.564745	-0.442243	-0.09	-0.008	-0.054	0.031	0.104	-0.56	-0.62	-0.506	12.5932	high
NPICH_01_S_0461_ARMS261104	Henderson	-0.937793	-0.51991	-0.464315	-0.138733	-0.396339	0.00796639	0.258656	-0.285349	-0.395776	0.825832	0.0502317	-0.834319	-0.351914	-0.290445	-0.749563	-0.397902	-0.237107	-0.67999	-0.424504	-0.625645	-0.326255	-0.73018	-0.325557	-0.0738392	-0.456432	-0.243826	-0.614187	-1.53393	-0.437526	0.0769525	0.171665	0.030421	-0.594588	-7.54815	-0.563792	-0.710925	-0.736775	-0.243	-0.06	-0.177	-0.198	-0.116	-0.943	-0.361	-0.891	13.536	high
NPSTM_04-1242_LMS171104	Henderson	-0.989617	-0.562708	-0.474343	-0.3785	-0.229259	-0.267999	-0.400798	-0.0211547	-0.139634	-0.0245456	-0.137983	-1.17695	-0.404395	-0.228539	-0.425003	-0.512007	-0.141557	-0.647464	-0.2985	-0.591498	-0.278909	-0.591815	-0.712187	-0.432412	0.307167	-0.34173	-0.100263	0.645517	0.83231	0.64114	0.461866	0.331691	-0.161869	1.58626	-0.277924	-0.382197	0.333168	0.087	0.167	-0.062	-0.077	-0.013	-0.119	0.207	0.74	12.8001	high
NPSTM_244_SS081004	Henderson	-1.03124	-0.504566	-0.585188	-0.0658427	-0.235241	-0.204927	-0.0096148	0.136335	-0.158745	0.36181	0.0224973	0.0573258	0.258519	-0.0648239	-0.10941	0.0189174	0.154347	0.283393	1.04948	-0.153373	-0.41805	-0.179503	-0.131335	0.318319	-0.70674	-0.201522	-0.27274	-1.26275	-0.850383	0.134626	0.171665	0.596992	-0.433139	-8.62852	-0.284679	-0.41281	-0.63519	-0.052	-0.231	-0.11	-0.31	-0.254	-1.309	-0.665	-0.532	11.8701	high
NPSTM_674-1_MLS290404	Henderson	-0.741086	-0.482383	-0.287448	-0.393443	0.0386016	-0.163429	-0.235885	0.00298525	0.00417474	-0.00728923	-0.0643713	-0.304651	-0.293909	0.00302284	-0.211441	0.171405	0.063852	-0.38963	-0.185231	1.3975	0.262226	-0.515956	-0.287439	-0.118648	0.360777	0.530354	-0.0910275	1.48517	-0.295945	0.947413	0.663188	0.929384	0.163349	1.10543	-0.368442	-0.37386	-0.0442616	0.24	0.23	-0.086	-0.136	-0.02	0.33	1.198	0.001	13.1503	high
NPSTM_691_SS081004	Henderson	-0.98927	-0.529041	-0.511365	-0.106579	-0.28524	0.066934	0.437837	-0.0762656	-0.299909	-0.301223	0.186162	-0.0382649	-0.23038	0.160895	-0.252533	0.185009	0.270025	-0.306911	-0.302568	-0.149536	-0.269113	-0.575802	-0.247505	0.0724713	-0.362188	-0.413336	-0.348411	0.738874	-0.0912315	0.533013	0.399121	0.651381	-0.612108	-2.59447	-0.582469	-0.413225	-0.792691	0.152	-0.05	0.059	0.031	-0.089	-0.128	-0.499	-0.076	12.0732	high
NPSTM_692_SS081004	Henderson	-0.678081	-0.233668	-0.493792	-0.231416	0.363132	0.239944	-0.504627	-0.359417	-0.103249	0.538375	-0.246958	-0.315891	-0.186186	0.142334	0.352566	0.42045	0.254014	-0.0588227	-0.432823	-0.336129	-0.178412	-0.242896	-0.216647	-0.1122	0.152389	-0.379724	-0.0171986	-0.654813	0.0211822	0.195528	0.26422	0.0688358	2.31473	5.10977	0.79458	1.0419	0.581915	0.073	0.042	-0.022	0.194	0.144	-0.248	0.071	0.033	11.7939	high
GSM48681	Baird	-0.409291	-0.368202	-0.457191	-0.523687	-0.796143	-0.0742739	0.0776729	-0.344023	-0.376027	-0.444481	-0.102271	-1.68531	NA	-0.000855609	-0.179672	-0.509189	-0.179206	-0.266015	-0.0211509	-0.408276	-0.544148	-0.160496	NA	-0.636621	-0.229323	-0.545372	-0.58483	-0.211407	0.430071	0.36579	0.836983	0.961213	-1.42042	-3.94561	-0.619305	-0.397572	-0.464707	0.06	0.248	0.068	0.057	-0.084	-0.153	0.582	0.506	12.622	high
GSM48683	Baird	-0.342086	-0.248574	-0.443895	-0.00979506	-0.0537208	0.0518914	-0.00481981	0.0225508	-0.00472046	-0.119887	0.150596	0.631847	NA	0.164399	0.0571162	-0.382051	-0.0325401	-0.143659	-0.311767	-0.514261	-0.119155	-0.0158172	NA	0.450025	0.143203	-0.232846	-0.189879	-0.0758811	0.893171	0.459508	0.89665	0.603335	-0.854427	-4.65631	-0.0887074	-0.642551	-0.601708	0.056	0.275	0.085	0.124	0.091	0.203	-0.255	0.035	12.4059	high
GSM48684	Baird	0.734206	0.50219	0.161969	0.317788	1.14746	0.0725782	0.0242359	0.258606	0.232762	0.288572	0.241108	-0.035618	NA	0.509672	1.11381	1.32359	-0.402044	-0.10209	-0.472262	0.0123586	0.420326	0.790491	NA	0.0772268	0.562592	-0.136542	0.637325	-1.09115	0.157645	0.577147	0.464408	0.29143	1.19759	6.17026	1.49172	2.09779	1.06124	-0.137	-0.051	-0.119	0.015	0.007	0.631	0.363	-0.694	12.1492	high
GSM48685	Baird	0.555864	-0.137526	0.584432	0.347815	0.160747	-0.213044	0.231555	0.121105	0.243287	-0.405656	0.090689	0.0251275	NA	0.072976	0.0423611	0.441626	-0.258624	-0.0221368	0.731576	0.872301	0.382799	-0.238136	NA	0.206621	-0.0838836	0.843739	0.236229	2.27042	-0.637237	0.752436	0.83268	0.485422	-0.120674	-2.56345	-0.112335	-0.284906	-0.0612531	0.045	-0.175	-0.021	-0.006	-0.06	-0.368	-0.256	0.164	12.3615	high
GSM48686	Baird	0.222121	-0.326645	0.437095	0.229173	0.443871	0.208081	0.291385	-0.538143	0.277963	0.317222	0.550266	0.351954	NA	0.114071	0.0951595	0.33754	0.696641	-0.20117	-0.789495	0.628917	0.192924	-0.754136	NA	0.0984631	0.253805	0.252056	0.203149	-0.202226	1.01662	0.39435	0.373518	0.391626	0.6639	-3.43739	0.297821	-0.105596	0.272226	0.124	0.575	-0.006	0.129	0.196	0.148	0.933	0.027	12.1268	high
GSM48687	Baird	0.201204	-0.0524245	-0.0188744	0.0592909	0.0133591	-0.0437431	-0.4789	-0.11799	0.219239	0.0703499	-0.192966	0.0358142	NA	-0.198279	-0.537478	0.00997507	-0.257412	0.272105	-0.0359208	-0.354697	0.131208	0.237106	NA	-0.0435135	0.1788	-0.290376	0.0979691	-1.17118	0.405014	0.541002	0.339163	0.229871	0.32767	2.08266	0.410911	0.431684	0.352912	-0.261	-0.211	-0.02	-0.097	0.023	0.004	-0.181	0.078	12.0822	high
GSM48688	Baird	0.108272	-0.173145	0.0217107	0.62716	0.325152	-0.0598464	0.159029	0.431648	0.295397	0.204097	0.347609	1.91703	NA	-0.0433077	-0.245003	0.535062	0.110556	0.375674	0.358113	0.647812	0.836592	0.610704	NA	0.28547	0.165765	0.545978	0.297173	0.728981	1.05286	0.511139	0.0588516	0.762168	0.439777	-2.42302	0.434818	0.330096	0.169588	0.107	0.295	0.304	0.192	0.009	0.313	0.952	0.047	12.7153	high
GSM48689	Baird	0.0431673	-0.22935	-0.0673413	-0.0400666	0.290526	-0.00617451	0.146447	0.0288549	0.0441836	-0.215795	0.608382	0.114277	NA	0.239179	0.359111	0.031137	0.244167	0.534954	-0.149343	-0.408361	0.276102	-0.253608	NA	0.145401	0.202999	0.470798	0.330396	-0.465589	0.268154	0.536923	0.55757	0.380753	0.306971	-4.19554	0.349194	0.115991	0.479834	-0.023	0.065	0.034	0.157	0.103	0.902	-0.057	0.711	12.5009	high
GSM48690	Baird	-0.0469935	-0.32734	-0.2235	-0.158711	-0.521131	0.0534051	0.0448532	-0.497322	-0.23002	-0.197059	-0.433724	-1.22323	NA	-0.135034	-0.258872	-0.304262	-0.378538	0.151309	0.195676	0.588151	-0.0172117	-0.420367	NA	-0.431706	-0.13547	0.0955238	-0.225041	0.501108	0.33316	0.319817	0.554573	0.79262	-0.632804	1.99257	-0.439288	-0.388812	-0.241649	-0.048	-0.064	-0.153	-0.102	-0.154	-0.307	-0.008	0.045	11.9911	high
GSM48691	Baird	0.357947	-0.0779985	0.382933	1.42476	1.05367	1.19525	0.846984	1.01175	0.992851	0.929794	1.034	0.26988	NA	0.81903	1.52296	0.518498	0.874338	1.17287	1.38707	0.037683	0.276465	0.656415	NA	0.890945	0.521802	0.902091	0.581463	-0.301419	-0.456395	0.82027	0.381893	0.651981	1.11009	-0.842154	0.610139	0.457633	0.837614	0.825	0.585	0.725	0.88	0.786	-0.076	0.253	0.037	12.2987	high
GSM48692	Baird	-0.206118	-0.277545	-0.240802	-0.715056	-0.140505	-0.394017	-0.082742	-0.544269	0.071131	-0.258851	-0.149851	-0.0194881	NA	0.0516032	-0.831486	-0.0346853	-0.14647	-0.143055	-0.604645	0.492621	-0.111774	-0.149697	NA	-0.282752	0.285785	-0.16833	-0.493845	0.878912	-0.166473	0.421607	0.368624	0.621053	-0.152289	2.99397	-0.0895547	-0.117193	-0.549733	0.096	0.051	-0.058	0.043	-0.068	0.237	0.045	-0.06	12.2538	high
GSM48693	Baird	0.279634	-0.401888	0.511772	0.843525	-0.160289	-0.201121	0.233754	0.31928	0.0889153	0.104477	0.352068	0.443846	NA	0.0710203	0.224822	-0.0729776	0.124549	0.0691331	0.579009	-0.281321	0.194941	-0.378389	NA	0.111946	0.0110466	0.429743	0.367804	0.0601305	-0.448862	0.161393	0.360187	0.262989	0.483785	-0.970878	-0.0734399	-0.213665	0.0860176	-0.027	-0.034	0.044	0.099	0.142	0.202	-0.368	0.076	11.1317	low
GSM48695	Baird	0.390447	0.0568185	0.0446063	0.0853089	0.63362	-0.407267	0.258294	-0.136266	-0.20277	-0.25297	0.208019	0.510374	NA	0.368466	1.00747	0.655452	0.0748491	-0.144619	0.519737	1.25863	0.70853	0.302821	NA	0.0168735	0.465576	0.61805	0.386047	1.13888	0.649119	0.886673	0.0588516	0.353955	0.783504	0.510691	0.459538	0.348739	0.248047	0.079	0.432	-0.01	0.034	0.008	0.787	0.842	0.311	11.9619	high
GSM48696	Baird	-0.0755811	-0.236455	-0.0120419	-0.347068	-0.351245	-0.0249818	-0.164065	-0.375321	-0.128098	0.183074	-0.00144111	-0.246952	NA	-0.488958	-0.130121	-0.36038	-0.361473	-0.131845	-0.713669	0.0597163	-0.250912	-0.321491	NA	-0.48653	-0.077934	-0.653548	-0.0777036	-0.00364279	-0.136774	0.269725	0.638381	0.611285	-1.07829	2.28823	-0.505928	-0.448315	-0.364194	0.143	-0.153	-0.112	-0.12	-0.143	-0.201	-0.3	-0.242	11.1902	low
GSM48697	Baird	0.560001	-0.00629202	0.601	0.0760882	0.495175	-0.323989	-0.0978992	-0.466145	0.000195457	0.151359	-0.164909	-0.143081	NA	-0.0987496	0.233738	0.797539	-0.344471	-0.280056	-0.676902	0.392152	0.344436	0.180115	NA	0.0297455	0.52998	0.0342148	0.618172	0.130339	0.776222	0.344641	0.22344	0.64367	0.850584	4.1267	0.701003	0.536124	0.871504	-0.098	0.149	-0.104	-0.076	-0.053	0.166	1.064	-0.119	11.8928	high
GSM48698	Baird	0.147787	-0.297131	0.17418	-0.604599	-0.0676399	-0.463873	-0.312461	-0.233787	0.108706	0.173672	-0.13467	0.45598	NA	-0.203106	-0.801566	-0.0792741	-0.341643	0.201532	-0.653171	-0.485839	-0.192484	-0.827814	NA	-0.237286	0.0685826	-0.146726	-0.0812695	0.549454	1.31431	0.18951	0.0588516	0.812921	0.605498	1.61879	0.364158	0.527167	0.022297	-0.034	0.04	0.126	-0.02	-0.047	0.775	0.021	0.301	12.1947	high
GSM48699	Baird	0.138365	-0.310139	0.192458	0.0532757	-0.455753	-0.372051	-0.0964542	-0.149449	-0.290749	-0.769613	0.0694574	-0.167348	NA	0.0850826	1.51712	-0.228804	0.171638	-0.0732862	-0.213888	0.345397	0.0175832	-0.11269	NA	0.158125	-0.316817	-0.727902	-0.0860361	-0.838235	-0.339316	0.632921	0.666673	0.894107	-0.161762	0.843838	-0.295502	-0.472961	0.0464639	-0.062	0.002	-0.151	-0.114	-0.208	-0.089	-0.679	0.226	12.4145	high
GSM48700	Baird	0.268448	-0.290535	0.378659	-0.488681	-0.32165	-0.187432	-0.197345	-0.0724382	0.104849	-0.0134113	-0.244222	-0.358886	NA	-0.354656	-0.552505	-0.136546	-0.355572	-0.355351	-0.495656	0.173698	0.241247	-0.521628	NA	-0.43273	0.243926	-0.318005	0.0758652	-0.124507	1.3312	0.086929	0.469417	0.75781	-0.127638	0.592739	-0.432755	-0.302734	-0.0602914	-0.101	0.106	0.018	0.098	-0.094	-0.278	0.309	-0.45	11.3711	low
GSM48701	Baird	0.0571993	-0.11355	-0.0608213	0.146867	-0.0917987	-0.546345	-0.0600785	-0.414404	-0.0399299	-0.279138	-0.0320471	-0.396666	NA	-0.0382053	-0.00318028	-0.16796	-0.317795	0.24968	0.0370551	-0.235128	0.0483662	-0.546482	NA	-0.0808154	-0.281352	-0.0334623	-0.244848	0.154439	-0.804276	0.21822	0.751003	0.957924	-0.308167	-0.414393	-0.0981624	-0.685571	-0.443736	0.272	-0.182	-0.019	-0.109	0.006	-0.266	-0.227	-0.153	11.1435	low
GSM48702	Baird	0.366771	0.158687	-0.011306	0.0268165	0.592992	0.24181	0.0898305	-0.187708	0.0294473	-0.361328	-0.0096681	0.235134	NA	0.0896712	1.03058	0.656563	0.141914	0.244266	-0.0507391	0.532724	0.374452	0.712283	NA	0.0698621	0.111786	0.0703284	-0.0100605	-1.53423	-0.121875	0.278788	0.648372	0.588948	0.989911	6.54881	0.927873	1.24126	0.787248	-0.097	-0.081	-0.173	-0.063	0.021	0.234	0.156	0.009	13.0268	high
GSM48703	Baird	-0.250368	-0.59685	0.0477136	-0.162228	-0.805577	-0.374265	-0.281109	-0.0630712	-0.198079	-0.0177398	-0.415543	-1.63913	NA	-0.136102	-0.420068	-0.227862	-0.0864808	0.0250332	-0.639611	-0.00858364	-0.100093	0.231283	NA	-0.47658	-0.319629	-0.47743	-0.238466	-0.284436	0.143433	0.862883	0.856638	0.827861	-0.592724	5.46344	-0.577824	-0.520578	-0.0630163	0.277	-0.095	-0.017	0.134	-0.02	-0.362	0.231	0.266	12.5314	high
GSM48704	Baird	-0.158724	-0.38415	0.00621244	-0.621581	-0.20336	0.063322	-0.243057	0.165341	-0.0499653	0.0552568	-0.15969	0.342682	NA	-0.412086	-0.947837	-0.552465	-0.154816	-0.197865	-0.748083	0.406278	-0.147525	-0.256292	NA	-0.604428	-0.118127	-0.0318157	-0.325809	-0.930778	0.900955	0.167785	0.145829	0.291072	-0.667334	-3.17351	-0.878671	-0.927013	-0.287327	-0.002	0.346	0.036	0.018	-0.051	0.604	0.411	0.042	11.9119	high
GSM48706	Baird	-0.102729	-0.124323	-0.345409	0.00061061	-0.506495	0.0819394	-0.271584	0.373919	-0.633608	-0.16605	-0.320112	-0.340837	NA	-0.204313	-0.17812	-0.913501	0.0723178	0.144501	0.362716	-0.166729	-0.559593	-0.82657	NA	-0.117296	-0.320967	-0.394649	-0.435898	0.599689	-1.24622	0.575856	0.918795	0.0420246	-0.597923	-3.55449	-0.548176	-0.609572	-0.703707	-0.125	-0.349	-0.163	-0.275	-0.187	-0.64	-0.505	-0.28	11.9204	high
GSM48707	Baird	-0.0998231	-0.265184	-0.167575	-0.218035	-0.157995	-0.498718	-0.130091	0.0786093	-0.0318586	-0.0813008	0.0471756	-0.528517	NA	-0.327083	0.5768	-0.0587227	-0.00333197	0.153612	-0.25614	0.135858	0.0630587	-0.672194	NA	-0.117876	-0.000259077	0.189347	0.155723	0.492557	0.327511	0.624273	0.392335	0.760487	-0.315236	0.790568	-0.107864	-0.638837	0.109069	0.034	0.217	0.042	-0.055	-0.038	0.159	0.155	0.732	11.7815	high
GSM48709	Baird	-0.293145	-0.145346	-0.402017	-0.0312852	-0.576006	0.0093859	-0.246582	0.0915478	-0.0920181	0.00415771	-0.234638	-0.273421	NA	-0.260991	-0.556828	-1.02956	0.170192	-0.349888	-0.638421	-1.01905	-0.623685	-0.0598849	NA	-0.442732	-0.497379	-0.490251	-0.696618	-0.171693	-0.756941	0.815592	0.881563	0.464467	-0.852404	3.298	-0.534238	-0.571306	-0.824862	0.288	-0.268	-0.033	-0.118	0.035	-0.212	-0.52	-0.272	11.5449	low
GSM48711	Baird	0.210187	-0.395232	0.423465	-0.273025	0.195806	0.196548	-0.0206992	-0.20012	0.388424	0.188808	-0.0743693	0.245928	NA	-0.208592	-0.179274	0.715565	-0.159802	0.0358314	-0.69025	0.0657136	0.139405	0.134934	NA	0.163435	0.250851	0.0509641	0.185075	-1.53289	0.197491	0.604624	0.609177	0.464134	-0.00546867	-4.04117	0.332408	-0.207569	0.388917	0.028	0.523	-0.001	0.153	0.062	0.209	0.417	0.879	12.1543	high
GSM48715	Baird	-0.262287	-0.209344	-0.292487	-0.699599	-0.656788	0.0126742	-0.171942	0.014606	-0.613264	-0.157293	-0.294514	0.433351	NA	-0.544797	-1.32119	-0.833886	-0.207696	-0.225496	-0.062687	0.252485	-0.452696	-0.0729378	NA	-0.324647	-0.506358	-0.811418	-0.664145	0.877084	-0.810237	0.122646	0.84533	0.0765216	-2.67133	-0.342212	-1.04504	-0.956553	-0.976831	-0.058	-0.429	-0.143	-0.102	-0.153	-0.952	-0.421	-0.43	12.2201	high
GSM48716	Baird	0.56662	0.142544	0.195719	0.368312	1.15112	-0.0398701	0.252499	-0.227838	0.594089	0.512079	0.317573	-0.214201	NA	0.395008	0.855664	1.29062	0.545787	0.406643	0.203262	0.172275	0.302148	0.058017	NA	0.153349	0.136549	-0.112671	0.659371	0.717186	-0.205364	0.705181	0.155973	0.58306	1.63447	4.89527	1.00061	1.05716	0.965867	0.119	0.493	0.232	0.072	0.22	0.546	0.523	0.469	11.9279	high
GSM48718	Baird	-0.0826293	-0.331613	0.0201947	-0.0524986	-0.45427	-0.0516195	-0.218144	-0.457002	0.0566387	0.350998	-0.145907	0.1263	NA	-0.570903	-0.445265	-0.592977	0.117338	-0.128088	-0.773724	-0.200936	-0.288042	0.498049	NA	0.0246598	0.0790867	-0.0730167	-0.177584	-0.690561	0.182826	0.800434	0.385755	0.364128	-1.1625	2.1676	-0.135798	-0.45231	-0.452521	0.253	-0.215	-0.147	-0.217	-0.069	0.038	-0.102	-0.106	11.9034	high
GSM48720	Baird	0.0203124	-0.13561	-0.0780507	-0.0346986	-0.0300231	0.301206	-0.0274856	-0.0973692	-0.0750231	0.10449	-0.107512	-0.0989795	NA	-0.189833	0.345743	-0.847075	-0.060325	-0.346189	0.0599527	-0.403535	-0.488566	-0.642134	NA	-0.171916	-0.444092	-0.121323	-0.393593	-0.482184	-0.768783	0.110423	0.457244	0.800942	-0.111457	-5.51772	-0.716554	-0.480056	-0.840997	-0.184	-0.023	-0.222	-0.229	-0.384	-0.188	-0.307	-0.29	11.2126	low
GSM48721	Baird	0.224003	-0.265461	0.298652	-0.0831975	-0.20646	-0.0942942	-0.54814	-0.353807	0.0877652	-0.000188142	-0.391743	-0.0586888	NA	-0.240288	-0.664998	-0.316002	-0.0758463	-0.0472867	-0.822762	-0.507545	0.0830225	-0.70699	NA	-0.180068	0.106463	-0.0528279	0.211788	-0.497856	1.12876	0.185113	0.939286	0.0726535	-0.334803	-5.47374	0.0874093	-0.0818096	0.0849485	-0.014	0.003	0.003	0.26	-0.05	-0.164	-0.061	0.033	11.1974	low
GSM48722	Baird	0.307066	-0.00563004	0.101172	0.399961	0.50428	0.107858	0.149682	-0.125044	0.0501818	-0.116267	0.226914	0.488685	NA	-0.0188179	-0.0226842	0.157646	0.138943	0.330101	-0.29998	0.287791	0.468825	-0.0239548	NA	0.172638	0.249776	0.179212	0.357794	0.595067	0.693981	0.672276	0.104187	0.297794	0.0907564	-1.35778	0.333559	0.135274	0.53478	-0.041	0.262	0.098	-0.09	-0.022	0.199	-0.003	0.16	12.8105	high
GSM48723	Baird	-0.1568	-0.204057	-0.250106	-0.85905	-0.854401	-0.126588	0.0978129	-0.40756	-0.724614	-0.504485	-0.40104	-0.812461	NA	-0.328197	-1.32562	-0.984573	-0.376953	-0.173487	0.0193212	0.436131	-0.713684	-1.65007	NA	-0.36309	-0.517752	-0.847409	-0.91245	1.1459	-0.860564	0.376548	0.408792	0.574544	-1.69708	1.37405	-0.981764	-1.07107	-1.30121	-0.121	-0.351	-0.203	-0.113	-0.247	-0.463	-0.003	-0.645	11.6104	low
GSM48724	Baird	0.0338556	-0.18232	-0.0825467	0.0166738	-0.0569492	0.038682	0.47625	-0.148246	-0.16887	0.017556	0.0234426	-0.424609	NA	-0.224069	-0.326294	0.131235	-0.180852	0.178087	-0.0814551	0.0702805	-0.0617186	-0.446186	NA	0.0538421	-0.332302	-0.0933565	-0.111518	-0.379978	0.178534	0.609543	0.978218	0.268829	0.0719387	-3.31072	0.00100671	-0.39359	-0.155336	0.05	0.238	-0.133	-0.047	-0.206	-0.402	-0.153	-0.148	11.5709	low
GSM48725	Baird	-0.260706	-0.178198	-0.373162	-0.671137	-0.546507	-0.208742	-0.346359	0.0310935	-0.494609	-0.453324	-0.234173	0.587523	NA	-0.0660077	0.140448	-0.340598	-0.155152	0.433557	-0.787903	-0.650242	-0.600016	0.0787609	NA	-0.31706	-0.360816	-0.106015	-0.53793	-0.728925	-0.749521	0.746501	0.299515	0.411333	-0.0135853	-0.816833	-0.202337	-0.143387	-0.639184	0.339	-0.252	-0.204	-0.139	0.061	-0.107	-0.322	-0.381	11.5677	low
GSM48726	Baird	-0.252967	-0.389582	-0.171371	0.225273	0.0322873	0.182058	0.109733	0.341316	-0.0114836	0.0938172	-0.130569	-0.114962	NA	-0.182908	0.205477	0.278003	0.18222	-0.0564099	0.384582	-0.413303	-0.0685314	-0.313847	NA	-0.0926935	-0.184087	0.16406	-0.0115945	0.478174	-0.264484	0.125762	0.127954	0.0832599	-0.25755	-2.97231	-0.236508	-0.532197	-0.495861	-0.035	-0.067	0.006	-0.004	0.036	0.008	-0.249	0.268	12.0203	high
GSM48727	Baird	0.441279	0.0831429	0.11041	0.544472	1.18952	-0.324739	0.28037	0.0985382	0.396427	0.132204	0.573976	0.552396	NA	0.468718	0.983413	0.973478	0.151758	0.0640755	-0.00132543	1.10237	0.852777	0.299019	NA	0.535595	0.798571	1.41833	0.798223	0.339657	0.918633	0.981771	0.470766	0.823895	1.56832	1.93134	1.14757	0.970801	0.912062	0.201	0.581	0.083	0.067	0.044	0.897	1.198	0.314	12.2653	high
GSM48728	Baird	0.385813	-0.134601	0.270118	0.574385	0.670889	-0.0625229	0.307721	-0.0298369	0.445069	-0.142667	0.410256	0.150216	NA	0.204196	0.138543	0.800257	-0.0697471	0.434624	0.103413	0.582618	0.580059	1.1642	NA	0.500233	0.307466	0.59669	0.561854	0.933568	0.0781643	0.969482	0.600584	0.571903	0.829649	0.999362	0.59258	0.0186712	0.829892	0.043	0.27	0.028	0.306	0.156	-0.073	0.716	0.279	12.3791	high
GSM48729	Baird	-0.0199833	-0.34752	0.109269	0.460813	0.0228345	-0.288682	0.349481	0.423044	0.486603	0.176941	0.248593	-0.032726	NA	-0.135175	0.590833	0.413878	-0.260745	-0.23632	-0.494703	0.260927	0.547599	-0.148429	NA	0.219527	-0.0582853	-0.0625821	0.628104	0.721577	-0.842155	0.9023	0.312536	0.831759	0.457843	3.95496	0.231972	0.000456428	0.604926	0.414	-0.123	0.053	0.101	0.036	-0.126	0.068	0.14	12.9831	high
GSM48732	Baird	-0.0656099	-0.0286649	-0.380259	1.05266	1.3239	1.71826	1.92412	1.49191	1.21437	0.913278	1.68749	1.40953	NA	1.80481	1.89184	1.28672	1.32878	0.65052	1.36824	2.15062	1.32312	0.991228	NA	1.94269	1.25157	1.14043	1.33809	0.904128	0.174987	0.875071	0.570379	0.315537	0.0950712	8.12656	1.02251	0.578517	0.745188	1.631	1.435	1.563	1.484	1.654	1.171	1.176	0.873	14.5825	high
GSM48735	Baird	0.137611	-0.0294953	-0.166578	0.174155	-0.1921	-0.64111	-0.359345	0.775723	0.632428	0.54068	0.221597	0.000252009	NA	0.524421	1.29802	0.25786	0.525198	1.67502	2.23164	0.106269	0.519233	0.466138	NA	0.196054	-0.0171529	0.308265	0.140529	0.294866	-0.246313	0.841942	0.234055	0.999972	0.541197	-2.54603	-0.0389468	0.310971	0.299294	-0.005	-0.284	0.226	0.098	-0.055	-0.286	0.593	0.467	13.2674	high
GSM48736	Baird	0.104783	-0.162121	0.0727411	0.660014	0.192359	0.0472515	-0.525999	0.894152	0.93948	0.211881	-0.215936	0.60468	NA	0.534933	0.188617	0.703955	0.176376	2.03526	0.805072	-0.123746	0.827191	0.203073	NA	-0.147028	0.798846	0.329636	0.831043	0.00923182	1.32699	0.852868	0.0588516	0.999937	0.161585	6.28793	0.494837	0.931408	1.38797	0.135	-0.114	0.583	0.464	0.329	0.695	0.696	0.599	14.0095	high
GSM48737	Baird	-0.451068	-0.298379	-0.567558	-0.840534	-1.17729	0.222391	-0.515354	0.119768	-0.291433	-0.242172	-0.19923	-1.45017	NA	-0.154359	-0.524585	-0.0721796	-0.297227	-0.339289	0.0222893	0.223087	-0.592641	-0.617356	NA	-0.390354	-0.084193	-0.662135	-0.704434	-0.135521	-0.343225	0.0783509	0.312646	0.742452	-1.11912	0.860155	-0.8133	-1.14049	-0.85038	-0.093	0.054	0.033	0.07	0.069	-0.178	-0.064	0.169	12.9179	high
GSM48738	Baird	-0.0824196	-0.303101	-0.0976413	-0.315268	-0.543933	0.159391	-0.0664663	-0.381961	-0.183871	-0.293375	-0.203797	-0.40401	NA	-0.292334	0.278418	-0.592342	0.134949	-0.234805	-0.036361	-0.700992	-0.457946	-0.104845	NA	-0.297263	-0.272292	-0.298383	-0.614361	-0.674849	-0.66489	0.21507	0.84777	0.832513	-0.865877	-5.20582	-0.774596	-0.699148	-1.05112	-0.206	-0.209	-0.265	-0.345	-0.341	-0.656	-0.426	-0.1	11.5086	low
GSM48739	Baird	-0.451917	-0.459729	-0.272508	-0.146191	-0.773104	0.074901	-0.28697	-0.305754	0.0538918	-0.0208179	-0.0923342	0.522549	NA	-0.218388	-0.404633	-0.632965	-0.308403	-0.313986	0.397253	-0.687613	-0.419412	-0.647049	NA	-0.235352	-0.364473	-0.25669	-0.403852	-1.01156	-0.742334	0.174507	0.857637	0.363881	-0.420332	-4.26903	-0.546695	-0.52811	-0.58255	-0.222	-0.372	-0.106	-0.031	-0.159	-0.575	-0.432	-0.335	11.2571	low
GSM48741	Baird	-0.199311	-0.369216	-0.118575	-0.363344	-0.521636	0.219466	-0.134996	-0.345409	-0.149187	-0.350897	-0.221276	-1.12522	NA	-0.104455	0.419398	-0.547555	0.227218	-0.125765	0.119596	-0.719423	-0.895597	-0.393779	NA	-0.440932	-0.364314	-0.415465	-0.514343	-0.329101	-0.792821	0.525352	0.498442	0.69862	-0.649844	-2.56566	-0.686624	-0.595012	-1.06648	-0.252	-0.268	-0.21	-0.355	-0.161	-1.2	-0.672	0.102	11.2405	low
GSM48743	Baird	-0.12746	-0.28237	-0.0358645	0.20327	-0.151107	0.985002	1.12553	0.451349	0.515617	0.316124	0.519818	0.59443	NA	0.538011	-0.180514	0.0405043	0.573774	0.31535	0.771071	1.41859	0.306372	0.946077	NA	0.710562	0.234039	0.578188	0.0388987	0.936212	0.0821354	0.569057	0.987457	0.154311	-0.47131	0.478408	0.100346	-0.0571844	-0.286341	0.728	0.596	0.62	0.598	0.656	0.045	-0.043	0.486	12.8318	high
GSM48744	Baird	-0.0519423	-0.335331	-0.00349007	0.502164	0.104153	-0.194793	-0.270388	0.273097	0.132562	0.0609734	0.288471	1.13036	NA	0.102211	1.07157	-0.0735821	0.400233	0.688018	0.121149	-0.637544	0.340998	0.625032	NA	0.215268	0.106892	0.32557	0.425438	-0.5182	0.829045	0.566311	0.0588516	0.46334	-0.513082	-1.34554	0.338074	0.468289	-0.10996	-0.09	0.135	0.22	0.028	0.049	0.341	-0.09	0.402	12.4676	high
GSM48745	Baird	-0.291863	-0.154719	-0.45708	-0.702324	-0.81383	-0.195981	-0.249287	-0.121124	-0.339132	-0.536	-0.537921	-4.1134	NA	-0.394841	-0.542772	-0.981156	0.09205	-0.739724	0.211173	-0.257464	-0.964714	-0.971039	NA	-0.418641	-0.496206	-0.703518	-0.990802	-0.314971	-0.607318	0.053277	0.122584	0.260221	-1.32548	-3.70246	-1.13533	-1.02156	-1.17811	-0.122	-0.453	-0.146	-0.291	-0.103	0.14	-0.632	-0.381	11.7062	high
GSM48746	Baird	0.486971	0.275884	-0.00536779	-0.401198	0.507077	-0.023409	0.22152	-0.0200569	0.116989	0.315982	-0.0488886	0.741707	NA	-0.10678	-0.445608	0.292103	-0.155019	-0.191347	-0.277574	0.632319	-0.0431674	0.570362	NA	-0.0890889	0.237761	-0.564151	0.0234873	0.366898	0.259212	0.0960143	0.673868	0.528666	0.420457	0.657962	0.648809	0.471678	0.767612	-0.043	0.206	-0.063	-0.009	0.044	0.405	0.599	0.137	11.7754	high
GSM48747	Baird	0.932854	0.276026	0.634362	0.892492	1.21349	-0.344449	0.059525	-0.200339	0.458037	-0.0688292	-0.292871	0.268685	NA	0.267556	-0.0493297	1.45398	-0.138024	0.329084	-0.320644	0.977461	0.471474	0.439645	NA	0.195374	0.479215	1.04252	0.808997	-0.376058	0.52379	0.735202	0.0588516	0.0403141	2.03443	2.93307	1.54267	1.16188	1.78973	-0.057	0.144	-0.076	0.107	0.032	0.334	0.113	-0.607	12.3878	high
GSM48748	Baird	0.241654	0.00243255	-0.0388638	-0.292547	-0.00738513	-0.124488	-0.065467	-0.00570046	-0.025716	0.0197533	0.80646	0.281746	NA	-0.211717	-0.516709	-0.383623	-0.0226409	-0.694763	-0.512781	-0.110061	-0.104041	-0.352357	NA	0.247767	-0.326339	-0.0545453	-0.315405	-1.04501	-0.973685	0.858447	0.839462	0.775644	-0.51141	3.48995	0.0614441	0.0204263	-0.0166269	-0.201	-0.448	-0.105	0.127	0.081	0.763	-0.585	-0.303	12.4596	high
GSM48749	Baird	0.901	0.169284	0.676245	0.723905	1.02999	-0.167478	0.124527	-0.304037	0.261665	0.335526	0.126152	0.0502002	NA	0.221321	0.569052	1.28045	-0.0896625	0.592835	-0.123898	0.394924	0.331288	0.497455	NA	-0.0400335	0.4601	0.161346	0.521423	0.580404	1.26058	0.313551	0.0588516	0.300747	0.799365	4.68851	1.27384	1.88991	1.47291	-0.057	0.089	-0.034	-0.021	-0.005	-0.301	0.679	-0.12	12.0501	high
GSM48750	Baird	0.537068	0.222915	0.0474876	0.501918	0.931317	0.275253	-0.0380908	0.101947	-0.0251272	-0.350135	0.0252655	0.158161	NA	0.0748304	1.10502	0.354994	0.17608	0.482614	-0.183318	0.210031	0.540925	0.437817	NA	0.3004	0.0338534	0.274427	0.157124	0.127063	-0.650136	0.952631	0.380303	0.537991	1.36708	0.2402	0.482256	1.02234	0.808251	0.013	0.189	-0.104	-0.015	-0.028	-0.086	0.353	0.108	12.1411	high
GSM48751	Baird	-0.309298	-0.197405	-0.276055	-1.13563	-0.880685	-0.133771	-0.820186	-0.162105	-0.757346	-0.0358343	-0.322401	-4.09883	NA	-0.318348	-0.901394	-1.06203	-0.483098	0.370861	-0.978168	-0.507322	-0.446583	-1.06519	NA	-0.459389	-0.447839	-0.681664	-0.607474	0.648283	0.830531	0.017671	0.0992817	0.506513	-1.60029	-1.41197	-0.506369	-0.303919	-0.839231	-0.042	-0.092	0.059	0.04	-0.109	0.592	0.247	-0.191	12.8622	high
GSM48753	Baird	0.0389724	-0.133387	-0.0775169	0.0620915	0.0737124	0.0564139	-0.337402	0.110977	0.0512247	0.0691574	0.19526	1.04994	NA	0.0354563	0.0326631	-0.460877	0.312315	0.754117	0.189729	0.0910046	0.00155349	0.475027	NA	0.127135	-0.242966	-0.151506	-0.172147	-0.746299	0.174424	0.848405	0.860701	0.636335	-0.399653	3.1135	0.0536493	0.143171	-0.127396	0.183	-0.033	-0.038	-0.055	-0.053	0.127	0.201	0.191	11.9799	high
GSM48754	Baird	-0.117749	-0.305626	-0.125449	-0.284433	-0.221817	0.474916	-0.283423	-0.0126534	0.146158	-0.114509	-0.262508	-0.507432	NA	-0.659323	-0.48157	-0.141416	0.211492	0.480885	-0.450906	-1.38114	-0.311115	-0.709203	NA	-0.452191	0.00930965	0.110677	0.24862	-0.855021	-0.0359866	0.243059	0.672396	0.240518	-0.273184	-3.92358	-0.106769	-0.455431	-0.0375951	-0.078	-0.352	0.017	-0.166	-0.061	-0.221	-0.524	0.18	12.243	high
GSM48755	Baird	0.117889	-0.189812	0.186937	-0.188413	-0.175807	0.111271	0.683436	0.455685	0.0532265	-0.32124	0.0740834	0.273563	NA	0.0423567	-1.22415	-0.0127416	-0.125341	0.515786	0.480615	1.07064	0.0924539	0.903465	NA	0.222213	-0.210221	-0.0934765	-0.316226	0.809132	-0.675987	0.523193	0.465512	0.654217	-0.328422	-3.14397	-0.545756	-0.345591	-0.905861	0.049	0.021	0.016	-0.014	-0.058	0.16	-0.486	-0.339	13.5643	high
GSM48756	Baird	-0.183275	-0.28471	-0.292	-0.484275	-0.412407	0.133739	0.0429295	-0.424958	-0.374386	-0.412896	-0.0297334	-0.785782	NA	-0.231352	0.0455806	-0.270312	-0.332757	-0.543475	-0.141428	-0.0696597	-0.142015	1.1229	NA	-0.567254	0.0571733	-0.24804	-0.369059	-0.0790891	-0.202169	0.186701	0.775597	0.60826	-0.810367	-4.69712	-0.730551	-0.68018	-0.442511	-0.03	0.387	-0.054	-0.118	-0.114	-0.714	0.646	0.777	11.7693	high
GSM48757	Baird	0.136518	-0.140338	0.025959	0.917697	0.492055	-0.256372	0.04586	0.644261	0.61566	0.498954	-0.14188	-2.29119	NA	-0.00195777	0.685266	0.499623	-0.0121931	0.520168	0.0278882	0.0732156	0.707664	1.84151	NA	0.328887	0.364465	0.424116	0.849518	0.0458116	1.06826	0.836515	0.132176	0.244707	0.284474	-1.30793	0.606672	0.262127	0.534881	-0.014	0.302	0.161	0.006	0.009	0.977	1.007	0.353	12.9358	high
GSM48759	Baird	0.402907	-0.104504	0.242816	0.27093	0.262954	0.0338764	0.15902	-0.365664	-0.108392	-0.176162	0.0796904	3.28474	NA	-0.0167468	0.168668	0.130798	-0.208875	0.578178	0.243728	0.48686	0.501597	0.308186	NA	0.0111154	0.0161217	0.611713	0.226171	1.18776	0.129088	0.934946	0.66584	0.65526	0.719108	2.44727	0.299091	-0.0262412	0.310851	0.053	0.024	-0.083	-0.05	-0.1	0.238	0.227	0.365	11.8777	high
GSM48760	Baird	0.216926	0.218231	-0.305234	-0.627134	0.428017	0.0581931	-0.241293	-0.0503161	0.0638857	-0.206271	-0.145537	0.705995	NA	0.259903	-1.08962	0.152333	-0.00122227	0.0784473	-0.457171	0.440693	0.14778	0.670446	NA	-0.419639	0.187486	-0.385583	-0.1377	2.20557	1.37824	0.258201	0.216361	0.484604	0.106802	-0.265984	-0.123915	0.507514	0.119671	0.057	0.406	0.115	0.093	0.003	0.452	0.791	-0.041	12.8584	high
GSM48761	Baird	0.523208	0.272149	0.20578	0.0222464	0.45863	-0.357153	-0.0766197	0.0631838	0.26419	-0.0327803	-0.0196094	0.94279	NA	0.191061	-0.800527	0.372805	-0.25178	-0.704285	-0.740702	0.140007	0.241991	0.560235	NA	0.239988	0.226195	0.536844	0.0476214	-0.352223	0.340733	0.230509	0.827737	0.275035	1.13207	2.85874	0.880762	0.581799	0.857391	-0.047	0.024	-0.014	0.081	0.249	0.594	-0.24	-0.492	11.9595	high
GSM48762	Baird	-0.217492	-0.34697	-0.0953355	-0.284337	-0.649609	0.0919306	-0.237372	-0.489891	-0.106068	0.103821	-0.521703	-1.33983	NA	-0.27795	0.0190128	-0.716644	-0.23078	-0.903987	0.270824	-0.148653	-0.56002	-0.297755	NA	-0.668731	-0.602211	-0.283617	-0.495999	-0.708605	-0.0116418	0.14651	0.132576	0.325453	-0.244131	1.88281	-0.50535	-0.377698	-0.600686	-0.253	-0.38	-0.244	-0.306	-0.205	-0.989	-0.466	-0.547	11.0545	low
GSM48763	Baird	0.176227	-0.170487	0.0401347	-0.00990092	0.3651	-0.0391598	-0.0714455	-0.141657	-0.186292	-0.406111	0.0389289	0.281425	NA	-0.0208514	0.268077	0.263316	0.0406129	0.281422	0.665178	0.543301	0.339397	0.369497	NA	0.0935293	-0.207532	0.615153	-0.0691941	1.29681	-0.345178	0.707771	0.472906	0.259079	0.451956	-0.585962	0.134267	-0.0568861	-0.259955	-0.075	-0.139	-0.144	-0.115	-0.187	0.072	-0.313	0.203	12.348	high
GSM48765	Baird	0.781349	0.504357	0.155	0.657623	1.63413	0.782401	0.779203	1.0914	0.707176	0.458315	0.884504	0.899538	NA	1.34827	-0.264234	1.3421	1.00625	0.502416	0.796662	0.306156	1.01749	1.02493	NA	0.765712	0.768762	0.21989	0.444417	0.0630923	0.113705	0.745905	0.211482	0.975149	1.60371	10.8141	1.73634	2.50048	1.0936	0.627	0.696	0.566	0.638	0.563	0.67	0.703	0.44	13.5324	high
GSM48767	Baird	-0.300667	-0.0599173	-0.521967	-0.489732	-0.383936	0.213935	0.343524	0.441358	-0.22711	0.11783	-0.12765	0.268142	NA	-0.12883	-0.0536354	-0.530323	0.382342	-0.0955741	0.15036	-0.347701	-0.478883	0.0656062	NA	-0.164925	-0.359191	-0.314739	-0.617357	0.950429	-0.901486	0.24132	0.558769	0.316208	-0.705218	-5.37652	-0.873736	-0.290869	-0.835418	-0.06	-0.006	-0.056	-0.206	-0.197	-0.153	0.109	-0.073	11.954	high
GSM48768	Baird	0.088457	-0.0305656	-0.230979	0.176786	0.584788	0.557287	0.324408	0.698935	0.548507	0.0425021	0.811267	0.942083	NA	0.663456	-0.507805	0.52553	1.06283	0.402932	1.56336	-0.14917	0.416507	1.32377	NA	0.620905	0.316024	-0.219377	0.0501039	0.397309	-0.314692	0.535353	0.0588516	0.98437	0.0165399	5.18245	0.599393	0.555638	0.258802	0.372	0.696	0.521	0.708	0.396	0.366	0.109	0.887	14.4887	high
GSM48769	Baird	-0.237131	-0.128207	-0.389953	-0.276482	-0.251386	0.552893	0.0648106	0.572202	0.0620577	0.236443	0.0894159	0.666762	NA	0.0873335	-0.804996	-0.64143	0.312186	0.0925854	0.619897	0.0792271	-0.471407	0.09329	NA	-0.0703334	0.13045	-0.134208	-0.361097	0.361948	-0.416172	0.129754	0.0925949	0.509976	-1.6211	1.51573	-0.612339	-0.140663	-0.899596	0.349	-0.113	0.203	0.18	0.321	-0.136	-0.649	-0.037	12.1101	high
GSM48770	Baird	-0.245146	-0.192505	-0.370141	-0.104236	-0.50822	0.318453	-0.0329582	0.179825	-0.119044	-0.119757	-0.199013	-0.0850505	NA	-0.0344126	-0.00975103	-0.545086	0.342213	-0.156097	-0.046763	-0.528848	-0.784045	1.57935	NA	-0.123403	-0.678458	-0.38675	-0.200562	-0.991103	-0.666321	0.0854491	0.468738	0.593094	-0.00442343	-6.11405	-0.383697	-0.725692	-1.00374	-0.065	-0.065	-0.103	-0.118	-0.203	-0.319	-0.498	0.029	11.5246	low
GSM48771	Baird	-0.267673	-0.196938	-0.415977	0.124597	-0.327467	0.0934886	0.0966277	0.030883	0.111801	0.257074	0.120419	0.533704	NA	-0.0675488	-0.0557237	-0.465022	0.382195	-0.324624	0.107755	-0.266862	-0.313189	0.72184	NA	-0.0714596	-0.499462	-0.0139963	-0.251576	-0.536461	-0.159548	0.986287	0.333054	0.970198	-0.537564	0.172911	-0.683159	-0.34084	-0.968143	0.315	-0.065	-0.008	-0.038	-0.027	0.038	-0.157	0.139	12.2786	high
GSM48772	Baird	0.428568	0.0734413	0.296246	-0.361923	0.0149827	0.20591	-0.406187	-0.304439	0.289308	-0.128702	-0.319122	-0.314178	NA	-0.0334967	0.0266095	0.320972	-0.709691	-0.230678	-0.378142	0.0969603	-0.00103127	-0.693222	NA	-0.342669	0.0553379	-0.0779814	0.122782	-1.45161	0.0762644	0.369169	0.630201	0.143556	0.600222	1.72182	0.674083	0.361269	0.704086	-0.408	-0.544	-0.191	-0.122	-0.047	-0.002	-0.62	-0.79	11.3761	low
GSM48773	Baird	0.167552	-0.42805	0.3737	0.272998	0.21031	0.0878585	0.306038	-0.375475	-0.0343196	0.194057	-0.208774	-0.502381	NA	-0.130481	-0.353033	-0.0983356	0.151679	0.250653	0.231479	-0.183307	0.200418	-0.0587861	NA	-0.0222568	0.0174249	-0.116367	0.135656	0.916032	-0.784495	0.35315	0.336791	0.161541	0.0906268	1.44876	-0.253514	-0.28046	0.685784	-0.039	0.107	0.029	-0.033	0.028	-0.634	0.017	0.255	11.9401	high
GSM48774	Baird	0.364072	0.306195	-0.171105	0.230178	0.887288	0.249921	0.848604	1.24755	-0.316357	0.0511721	0.226244	-0.0519443	NA	0.267141	0.796495	0.470262	0.610622	0.55803	-0.209717	0.152723	0.0222732	0.435222	NA	0.385623	0.225195	0.745846	-0.0669747	0.485749	0.893718	0.988985	0.312318	0.529652	1.71216	2.03047	0.574272	0.219734	-0.051494	-0.083	0.407	0.275	0.164	0.173	-0.284	0.589	-0.195	11.4341	low
GSM48775	Baird	-0.0933767	-0.413723	0.0402597	0.284891	-0.290437	-0.0872627	0.726041	-0.280766	-0.194259	0.0222208	0.0578639	-0.334356	NA	0.157905	-0.327367	0.18046	-0.297053	-0.643898	0.0201157	0.624957	-0.118602	-0.370564	NA	0.190672	-0.21347	-0.0349254	0.287701	-0.0793815	-0.905222	0.818827	0.928053	0.747601	0.416885	-0.460151	0.148809	-0.189908	0.245261	-0.212	-0.023	-0.094	-0.078	0.008	-0.076	-0.047	-0.269	12.5591	high
GSM48776	Baird	0.318505	0.0372972	0.0413287	-0.0786821	0.309451	-0.172433	0.462672	-0.199007	0.228296	-0.415164	0.132712	0.667591	NA	0.55528	0.208778	0.175793	-0.0268569	-0.331473	-0.907848	0.86631	0.275606	0.562726	NA	0.363478	0.290495	0.23043	-0.0167247	-3.78548	0.716629	0.945895	0.88768	0.489323	0.259133	-1.28863	0.264044	-0.00828828	-0.00319683	0.188	0.556	0.116	0.057	0.232	0.186	1.077	0.329	12.1668	high
GSM48778	Baird	0.348901	-0.0700272	0.167143	-0.387795	0.492811	-0.284914	-0.0257326	-0.186694	-0.181738	-0.0248132	-0.0168195	0.0701231	NA	0.0694244	-0.580928	0.328071	-0.146993	-0.0534696	-0.0759613	0.719436	-0.0661778	-0.446832	NA	-0.227754	-0.0954823	-0.493123	0.653704	1.39956	-0.260893	0.566176	0.913883	0.810417	0.501389	-0.0663114	0.236787	-0.169411	0.126114	0.093	-0.065	-0.059	0.113	-0.015	-0.106	-0.143	-0.108	12.9288	high
GSM48779	Baird	0.438672	-0.0503303	0.270557	0.347399	0.842044	0.076311	0.429418	-0.0134273	-0.321661	-0.0360504	0.374721	0.0994572	NA	0.273142	0.737705	0.553115	-0.124052	0.0627237	0.0271668	0.681294	0.655927	-0.527555	NA	0.363631	0.248495	0.501334	0.397834	0.744662	0.151982	0.927548	0.881243	0.58752	0.711318	-1.00275	0.28817	0.162067	-0.327751	0.037	0.174	-0.028	-0.051	-0.133	0.195	0.571	-0.391	12.7385	high
GSM48780	Baird	0.46194	0.246882	0.2301	0.345139	0.442938	1.06061	0.823502	0.337309	0.349898	0.760046	0.000618649	-0.329925	NA	0.534151	-0.773293	0.590953	0.276583	-0.120639	0.41194	0.433777	-0.121387	0.865001	NA	0.182336	0.501833	-0.271074	0.179505	-0.842415	-0.11628	0.0501347	0.436579	0.2689	0.444094	6.33867	0.80068	1.19166	1.24228	0.11	0.204	0.302	0.355	0.554	-0.486	-0.072	-0.454	12.2311	high
GSM48782	Baird	-0.0972044	-0.295539	-0.1846	-0.301182	-0.159256	-0.217006	-0.555111	-0.327136	0.0244335	-0.0555956	-0.273267	0.887151	NA	-0.0650907	-0.73509	-0.210594	-0.0603974	0.175377	-0.221022	-0.127683	0.00442597	-0.363336	NA	-0.224013	0.290143	-0.280046	0.143779	-0.447282	0.943548	0.143377	0.493153	0.452989	-0.254094	1.36523	-0.100524	-0.225029	-0.34294	0.07	-0.005	0.107	0.062	0.014	0.318	-0.143	0.355	12.0993	high
GSM48783	Baird	0.365741	0.0266237	0.108413	0.828527	0.785692	-0.466461	-0.0715926	0.209327	0.513255	0.264128	0.116027	1.19462	NA	0.368432	-0.479246	1.3218	0.109816	0.0961991	0.215819	0.227331	0.781251	1.19519	NA	0.552073	0.34954	0.236721	0.834195	0.755564	0.661531	0.28069	0.0588516	0.250633	1.63574	7.49271	1.06832	1.19529	1.10204	-0.112	0.148	0.151	0.263	0.053	0.824	0.018	0.033	12.5712	high
GSM48784	Baird	-0.00112489	-0.292985	-0.0215962	-0.0537695	0.0740403	0.0631877	0.367021	-0.0962251	-0.231253	-0.280707	0.230584	0.358913	NA	0.118596	-0.581215	-0.166307	-0.0979233	-0.250941	0.311556	-0.366308	-0.0567574	0.389262	NA	0.1451	-0.123691	-0.132769	-0.266169	-0.849116	0.332205	0.623852	0.821839	0.622578	-0.551759	-6.70599	-0.132542	-0.196285	0.167925	-0.041	0.364	0.012	0.107	-0.013	-0.061	0.618	0.615	12.529	high
GSM48786	Baird	-0.112824	-0.137327	-0.341015	0.361872	-0.184011	-0.0791861	0.0198773	-0.182618	0.029172	0.249878	-0.0259153	0.524096	NA	0.0250592	0.533644	-0.229712	-0.0015587	-0.476077	-0.32803	-0.757824	-0.0216375	0.0528663	NA	-0.187816	-0.167476	-0.0276232	-0.247696	-0.734246	-0.626445	0.414139	0.839177	0.666781	-0.0925071	2.9444	-0.0159379	-0.201929	0.0442477	0.395	-0.131	0.005	-0.201	0.05	0.041	-0.227	0.077	12.0346	high
GSM48787	Baird	0.0502505	0.0632694	-0.141742	0.0250922	-0.251012	0.0457101	0.369319	0.887488	-0.117904	-0.270205	0.0355123	0.059539	NA	0.0370212	-1.12858	-0.476699	0.0774802	0.552025	0.443193	0.638604	0.183847	0.388735	NA	0.142999	0.453571	0.532231	-0.0878804	2.17208	0.163296	0.576012	0.563127	0.172694	-1.25995	-0.120738	-0.373059	-0.271799	-0.0444969	0.108	0.04	0.096	-0.039	-0.022	-0.266	-0.038	-0.149	13.4709	high
GSM48789	Baird	0.167319	-0.18519	0.0803802	-0.0902672	-0.279567	-0.190967	-0.0504433	-0.00695504	-0.321242	-0.47885	-0.151769	0.0798676	NA	-0.269736	0.465471	-0.123729	-0.185201	-0.654698	0.347411	0.609097	0.11566	-2.06365	NA	0.307558	-0.0456213	-0.00317907	0.321869	0.316258	0.434373	0.513065	0.0680167	0.470181	0.163901	0.967105	-0.159635	-0.192668	0.167021	-0.069	-0.053	-0.101	-0.223	-0.099	0.012	0.525	-0.072	12.0891	high
GSM48791	Baird	-0.0192923	-0.455004	0.219104	-0.293897	-0.0897458	-0.0315591	-0.502317	-0.25004	-0.12521	-0.231405	0.0367796	0.148189	NA	-0.199838	-0.99767	-0.259002	-0.164313	0.807986	-0.249732	-0.311293	-0.050632	-0.456041	NA	0.220325	0.197133	-0.160769	0.0823801	-0.399722	0.630588	0.636371	0.122246	0.577786	-0.384336	-0.411649	-0.175018	-0.552548	-0.343844	0.164	0.366	0.098	0.25	0.101	-0.078	0.17	0.37	11.5592	low
GSM48792	Baird	0.0995267	-0.23114	0.0527104	0.019001	0.382515	0.628924	0.582968	0.772661	0.211975	0.344317	0.491686	0.571173	NA	0.356251	0.733701	-0.309203	0.477388	-0.277081	0.284616	0.0167552	0.00519417	0.23135	NA	0.682955	0.333447	-0.0414166	0.0851433	-0.666068	-0.171568	0.614589	0.641033	0.341757	0.105327	-2.831	-0.127228	-0.0709201	-0.11323	0.182	0.349	0.259	0.178	0.307	0.067	-0.029	0.791	12.926	high
GSM48793	Baird	0.702853	0.050481	0.51991	0.702008	0.743098	-0.0825312	0.0428115	-0.0497715	0.245972	0.180686	0.00837825	-0.361373	NA	0.25244	0.187968	1.20253	-0.163329	-0.200863	-0.323977	0.429607	0.550536	0.0272492	NA	0.183919	0.502963	0.180866	0.877041	-0.221275	0.965893	0.706896	0.759486	0.385744	1.26963	1.9917	1.21043	1.48313	1.41559	-0.143	0.203	-0.107	0.183	0.025	0.441	0.427	0.437	12.345	high
GSM48794	Baird	0.0797366	-0.160543	-0.011379	-0.25847	-0.33645	-0.189052	-0.106301	0.104245	0.120918	0.320925	0.108317	0.231189	NA	-0.150479	-0.0955411	-0.239286	0.217747	0.263459	-0.155555	0.564097	-0.0821535	0.929511	NA	0.000200169	0.159351	0.356027	-0.218197	0.0148387	0.701328	0.543337	0.473361	0.268737	-0.269534	0.802175	-0.050233	0.0566478	-0.212754	0.077	0.256	0.09	0.119	-0.067	-0.17	0.261	-0.12	11.9384	high
GSM48795	Baird	0.429143	-0.179103	0.35714	0.812628	0.516625	-0.115508	0.0666221	0.42981	0.409861	0.434095	0.387053	-0.0452457	NA	0.11295	0.30047	0.795406	0.305272	1.11111	0.0296603	-0.144276	0.616345	0.289054	NA	0.220221	0.705891	0.21566	0.845364	1.58633	0.509414	0.781249	0.228748	0.588635	0.864427	-0.780382	0.556407	0.686272	0.75332	0.269	0.459	0.288	0.329	0.201	0.127	0.207	0.644	13.46	high
GSM48796	Baird	0.376642	0.36708	-0.202798	-0.0516532	0.389461	0.34373	0.48771	-0.455113	0.0105348	0.321268	-0.146846	0.447697	NA	0.222011	-0.100181	0.199262	-0.174782	-0.315461	-0.262795	-0.194242	-0.0389916	0.15058	NA	0.151643	0.159993	-0.223173	0.0560844	-0.980603	0.306173	0.500074	0.846233	0.382802	0.265709	-1.66739	0.53515	0.282306	0.496244	-0.117	0.214	-0.074	-0.292	-0.063	-0.039	0.748	-0.501	12.3839	high
GSM48797	Baird	0.060178	0.0580523	-0.316202	0.0288164	0.075561	-0.122198	-0.0861802	-0.445337	-0.260597	-0.358396	-0.158925	-0.377909	NA	0.00540906	-0.0673946	-0.29157	-0.159654	0.187374	0.644435	0.261353	0.0597144	0.388076	NA	-0.0385073	-0.195715	0.0691511	0.204804	1.4677	-0.122121	0.760475	0.61765	0.115676	-0.1698	1.97033	-0.123084	-0.327746	0.327415	-0.035	-0.181	-0.166	0.026	-0.074	-0.359	0.112	0.137	12.1985	high
GSM48798	Baird	-0.0584536	-0.361099	0.000553528	0.112554	0.0160124	-0.0335208	0.354628	-0.0182766	-0.197925	-0.0325227	0.256597	-0.318338	NA	0.0109506	0.40432	0.257882	0.24795	-0.0543593	0.0394932	-0.254562	-0.0955148	-0.510892	NA	0.113394	-0.108945	-0.145786	0.247372	0.336987	0.145781	0.688568	0.435461	0.409644	-0.111986	0.0973179	-0.1509	-0.339878	0.323556	0.03	0.481	0.05	0.005	0.048	-0.165	0.305	0.698	11.6437	low
GSM48799	Baird	-0.219084	-0.318363	-0.318833	-0.25358	-0.561496	0.572647	0.484019	0.615445	0.05691	-0.0857541	0.0223118	-0.533334	NA	0.154168	-0.580786	-0.636767	0.103606	0.359347	0.945246	0.922623	0.0501739	0.598313	NA	-0.236959	-0.182367	-0.047149	-0.372763	0.866936	0.324092	0.558437	0.524284	0.568865	-0.876584	2.54614	-0.842412	-0.645884	-0.644252	0.345	0.232	0.226	0.348	0.377	-0.121	0.1	-0.094	12.8976	high
GSM48800	Baird	0.356584	-0.384052	0.663816	-0.065803	-0.598511	-0.127284	0.512642	-0.230369	-0.258513	-0.373683	0.241891	0.267544	NA	-0.0714859	0.34499	-0.121644	-0.345964	-0.428165	0.00380111	-0.240926	-0.344505	-0.883021	NA	0.0771154	-0.141246	-0.0884578	-0.111162	0.240942	-0.783259	0.771908	0.370791	0.807408	-0.763794	1.81166	-0.257649	-0.46822	-0.136833	-0.134	-0.023	-0.175	-0.232	-0.144	-0.286	0.378	-0.59	11.925	high
GSM48801	Baird	0.003345	-0.200705	-0.00192623	0.328794	-0.448679	-0.24354	0.148219	0.118265	0.135226	0.0924635	-0.39806	2.04158	NA	-0.284922	0.123574	0.07988	-0.216572	-0.180487	-0.322027	-0.842559	0.015948	0.821214	NA	0.196922	-0.34513	-0.347196	-0.294927	-1.38491	-0.731143	0.862322	0.847805	0.604632	-0.197513	0.393066	0.00766014	-0.493482	-0.290039	0.315	-0.197	0.019	-0.077	0.037	0.572	-0.542	-0.148	12.1902	high
GSM48803	Baird	-0.0749438	-0.346903	-0.0280672	0.0215191	0.0662388	-0.36492	-0.170746	-0.0170315	-0.0656452	-0.0769202	0.0117729	-0.158377	NA	-0.294729	-0.154653	0.148134	0.128504	-0.0441055	-0.15731	0.192729	0.212748	-0.00168784	NA	-0.110908	0.295051	0.395607	0.388629	0.406592	2.04097	0.473013	0.662881	0.557248	0.530577	-2.49102	0.211332	-0.279499	-0.165606	-0.15	-0.002	0.056	-0.035	-0.179	-0.133	0.521	0.556	12.6719	high
GSM48804	Baird	-0.078357	-0.00945128	-0.409222	-0.340421	0.0170955	-0.258077	-0.180656	-0.279733	0.00315417	0.0653756	-0.201453	-0.0454711	NA	0.0161175	-0.26916	-0.408158	-0.0315523	-0.0901043	-0.432598	0.679696	-0.0307762	-0.283117	NA	-0.496568	-0.0549727	0.0178512	-0.158801	-0.223241	0.476115	0.252571	0.0747787	0.324264	-0.180182	1.17619	0.000310114	-0.24674	-0.185567	-0.028	0.203	-0.02	-0.066	0.019	0.328	0.757	0.027	12.0009	high
GSM48805	Baird	0.389427	-0.197205	0.427933	0.631913	0.240951	0.0379734	0.0857435	0.115633	0.509903	-0.143674	0.152106	0.178638	NA	-0.0509557	0.154782	-0.0535863	0.155846	0.235076	0.324941	0.594485	0.576201	0.209445	NA	0.384477	-0.109305	0.252231	0.194306	1.00763	0.389448	0.822907	0.740951	0.394263	0.205964	-0.124438	0.313491	0.00457768	-0.0627261	0.076	-0.245	-0.074	-0.091	0.033	-0.544	-0.003	0.143	12.1188	high
GSM48806	Baird	-0.0519935	-0.230125	-0.0733443	0.0603585	-0.137792	-0.1625	-0.192773	-0.244691	0.0622544	0.0168132	-0.193368	0.144801	NA	0.0904478	0.832081	0.142212	0.0436408	-0.351051	-0.540156	-0.407776	0.203048	-0.288703	NA	0.0950798	-0.315098	-0.1601	-0.0492662	-0.0506046	-0.391152	0.935373	0.0588516	0.741514	-0.312205	5.30325	-0.14259	-0.0663248	-0.277058	0.18	-0.19	-0.028	-0.085	-0.005	-0.133	-0.125	-0.194	12.4998	high
GSM48807	Baird	0.202091	-0.232146	0.19611	0.426171	0.406543	-0.382191	0.00880411	0.216968	0.112029	0.530617	0.289412	0.763685	NA	0.175303	0.310397	0.600408	0.397057	0.938416	0.230564	0.371173	0.719953	1.24315	NA	0.111053	0.418445	0.652695	0.798051	1.16661	0.743538	0.765489	0.0588516	0.772333	0.757903	2.04426	0.479294	0.631549	0.78228	-0.088	0.382	0.222	0.132	0.03	0.38	0.86	0.513	13.416	high
GSM48808	Baird	0.145157	-0.19954	0.208433	-0.357091	-0.164081	-0.0671124	-0.390571	-0.176602	-0.0292757	-0.141761	-0.220244	-0.501781	NA	-0.104376	-0.0620755	-0.196177	0.0840944	0.486614	-0.46609	-0.143822	0.060458	-0.157409	NA	-0.236755	-0.0154207	-0.285306	0.0236408	-0.642611	1.50984	0.172027	0.0588516	0.287393	-0.411757	-0.811788	0.108646	-0.319744	0.432303	-0.133	-0.116	-0.047	0.037	-0.01	-0.303	-0.195	-0.115	12.0405	high
GSM48809	Baird	-0.480367	-0.301408	-0.587836	-0.449186	-0.887955	0.459409	-0.261916	-0.219833	-0.318802	0.0174213	-0.156955	-0.516638	NA	-0.252827	-0.124432	-0.982296	0.191795	0.0237728	0.136058	-0.362609	-0.847649	-0.377308	NA	-0.537874	-0.541839	-0.464908	-0.660757	-0.385292	-0.844625	0.0499742	0.849197	0.649387	-0.700681	-4.18313	-0.888066	-0.779794	-1.06366	-0.056	-0.257	-0.147	-0.133	-0.176	-0.703	-0.585	-0.292	11.8056	high
GSM48813	Baird	0.108399	-0.400076	0.350172	-0.607097	-0.602553	0.124346	0.400977	-0.298183	-0.132216	0.222693	-0.456203	-0.348078	NA	-0.498475	-0.762817	-0.341691	-0.503244	-1.1601	-0.586088	1.24954	-0.348824	-1.12098	NA	-0.451736	-0.0452602	-0.692409	-0.368027	-0.70497	-0.610406	0.30329	0.968738	0.530671	-0.976482	0.544655	-0.34091	-0.740714	-0.583115	-0.231	-0.115	-0.126	-0.23	-0.109	-0.086	-0.105	-0.605	12.6634	high
GSM48814	Baird	0.0281888	-0.496426	0.342097	-0.124565	-0.36462	-0.00355348	-0.076447	-0.553081	-0.353616	0.167143	-0.0984211	-1.52951	NA	-0.0929923	-0.328472	-0.336371	-0.0786573	-0.101466	-0.289583	-0.239669	-0.139092	-0.668617	NA	-0.478896	-0.244881	-0.42574	-0.025149	0.650422	0.793802	0.0740518	0.660112	0.444407	-0.0260208	-2.65035	-0.192521	-0.16199	-0.00941192	-0.29	0.044	-0.123	-0.1	-0.161	-0.261	0.234	0.05	11.9431	high
GSM48816	Baird	-0.0499531	-0.103737	-0.226674	-0.518796	-0.274098	-0.0971723	0.201071	0.305803	-0.195584	-0.0707949	0.241717	0.697742	NA	0.144475	-0.168647	-0.10774	-0.0021033	0.22422	0.833636	0.948131	0.149565	-0.123594	NA	0.475906	0.0902882	0.141636	0.212006	-0.102777	-0.693805	0.835767	0.767566	0.982127	-0.208075	0.24867	-0.525113	-0.263945	-0.9999	0.022	-0.025	0.144	0.18	0.11	0.555	0.419	-0.252	13.6491	high
GSM48817	Baird	0.797645	0.32728	0.34615	0.122082	0.679368	-0.105049	-0.231412	0.214754	0.289812	0.198301	-0.0647445	-0.238135	NA	0.192374	-0.213275	1.31438	0.104411	-0.0475128	0.038063	0.292267	0.444077	0.265131	NA	0.176169	0.637568	-0.0491597	0.550725	-1.0011	-0.150891	0.608566	0.566243	0.767833	1.38493	3.82054	1.33851	1.5542	1.39674	-0.124	-0.326	-0.051	0.029	-0.027	0.964	-0.567	-0.448	12.6182	high
GSM48818	Baird	-0.478172	-0.164382	-0.645903	-0.670075	-1.0948	0.548337	-0.280297	-0.273499	-0.550407	0.136837	-0.42309	4.64255	NA	-0.227622	-0.753058	-1.05693	0.34797	-0.147526	-0.199686	-0.418723	-0.940723	0.00363907	NA	-0.747023	-0.491883	-1.01375	-0.868682	0.00225157	0.103447	0.0021991	0.258402	0.384225	-1.45266	-1.64907	-1.07545	-0.946834	-1.20271	-0.197	-0.336	-0.23	-0.379	-0.27	-0.497	-0.328	-0.232	11.5809	low
GSM48820	Baird	-0.000945439	-0.249205	0.0207929	-0.185222	-0.197656	0.0713732	0.0506939	-0.137801	-0.17715	0.413887	0.0415706	0.399174	NA	-0.496851	-0.282444	-0.520725	-0.0495695	-0.301213	-0.422561	0.118068	0.0706945	1.07956	NA	0.0138887	-0.0179233	0.0855105	-0.0299999	-0.829924	0.367744	0.609279	0.99892	0.479073	-0.375135	-2.59974	-0.162823	0.0522842	-0.212406	-0.001	-0.358	-0.136	-0.094	-0.07	-0.2	0.001	-0.001	12.7081	high
GSM48821	Baird	-0.0466954	-0.329648	-0.0390873	0.0198731	-0.162463	-0.170575	-0.126052	0.0357932	0.0609358	-0.183583	-0.0313792	3.37039	NA	-0.0727582	-0.0350051	0.0317746	0.161244	0.328083	-0.0676012	-0.0733744	0.191947	-0.358007	NA	0.140088	0.345291	0.284451	0.408205	-0.0579631	1.93633	0.498183	0.651337	0.73354	0.658988	-1.895	0.402077	-0.0249285	-0.139037	-0.061	0.083	0.134	0.126	-0.031	-0.225	0.241	0.301	12.4757	high
GSM48822	Baird	0.391339	-0.156302	0.305156	0.168526	0.481264	-0.132773	0.173251	-0.468712	-0.0884305	-0.0945651	-0.123954	0.226037	NA	-0.0157386	0.139769	0.257185	0.33907	-0.243929	-0.0410629	0.651751	0.519564	-0.242324	NA	0.0912215	0.312764	0.716731	0.364498	-0.105596	0.0557674	0.701621	0.610744	0.524778	0.25608	-0.351715	0.208407	0.232322	0.298008	0.12	0.369	-0.088	0.042	0.08	0.209	1.302	0.293	12.3613	high
GSM48823	Baird	0.0675228	-0.193348	0.104756	-0.663918	-0.382011	-0.0484072	-0.415084	-0.0850981	-0.421029	0.0888227	-0.471425	-1.52848	NA	-0.317444	-0.674801	-0.728596	-0.224835	0.211403	-0.404018	-0.156988	-0.307976	-0.539248	NA	-0.758478	-0.0247461	-0.598218	-0.0815002	0.704192	0.161156	0.0106144	0.822253	0.66164	-0.880478	0.474535	-0.112612	-0.823481	-0.551298	-0.13	0.001	0.034	-0.029	-0.058	-0.179	-0.371	-0.219	11.7752	high
GSM48824	Baird	-0.420329	-0.287842	-0.319265	-0.52816	-1.13807	0.287381	0.0792387	-0.0787596	-0.298991	-0.345069	-0.358076	-0.805067	NA	-0.293901	-1.02204	-0.580659	-0.188761	0.379462	-0.0784845	0.33554	-0.491784	0.583997	NA	-0.454878	-0.239346	-0.0153003	-0.4947	0.188151	-0.219477	0.135362	0.596912	0.140082	-1.00419	0.462474	-0.541794	-0.285114	-0.532071	0.245	-0.172	0.092	0.023	0.005	-0.64	-0.407	-0.099	12.203	high
GSM48825	Baird	-0.312454	-0.334992	-0.219797	-0.173242	-0.676101	0.292053	-0.00085429	-0.107884	-0.0442072	0.612149	-0.546392	-1.0335	NA	-0.283504	0.167667	-0.572181	-0.240925	-0.672396	-0.0274038	0.489476	-0.197181	0.445808	NA	-0.916759	-0.477345	-0.483146	-0.196898	-0.194662	-0.473913	0.610785	0.665543	0.902928	-0.658937	3.83418	-0.635978	-0.582143	-0.485525	0.259	-0.4	-0.051	-0.221	-0.036	0.219	-0.191	0.026	11.4217	low
GSM48826	Baird	0.0590848	-0.0646346	-0.13571	-0.130066	0.0172037	-0.122012	0.208928	0.302486	-0.15479	0.437484	0.163392	2.41001	NA	-0.0918884	0.169156	-0.0657702	-0.0440389	0.441412	0.48871	0.369484	-0.0184116	0.218433	NA	0.286014	-0.295277	0.304717	-0.20799	-0.27256	-0.632112	0.709415	0.503502	0.548194	-0.477919	-0.869018	-0.274497	0.195257	-0.659521	0.12	0.068	0.066	0.15	-0.088	0.04	-0.279	-0.209	13.8215	high
GSM48827	Baird	0.326509	-0.192034	0.375085	0.124841	0.185147	-0.334541	-0.0337349	-0.171812	-0.0716614	-0.321181	-0.173925	-0.434739	NA	-0.00121694	0.953187	0.0789019	0.14518	0.127993	-0.484804	-0.0502758	-0.0118747	-0.225517	NA	-0.0198259	0.157821	-0.335358	0.0979776	-0.387899	-0.192295	0.585618	0.134888	0.535041	0.487199	3.19912	-0.0246884	-0.424481	0.0693807	-0.05	0.018	-0.143	-0.156	-0.024	0.331	-0.307	0.109	11.6171	low
GSM48828	Baird	0.390125	-0.168484	0.357256	0.674748	0.67235	-0.328448	-0.173367	1.13714	0.8219	0.227308	0.144585	-3.24799	NA	0.697871	0.308877	0.822981	0.824057	2.1935	1.2658	-0.214277	1.41742	0.929254	NA	0.51216	0.684001	0.810939	0.854134	5.38951	1.10405	0.989691	0.0588516	0.99971	0.270083	1.46694	0.435637	0.874365	0.613366	0.365	0.146	0.672	0.329	0.242	0.405	1.721	0.628	13.9117	high
GSM48829	Baird	0.58023	-0.0857449	0.566204	0.353023	0.517789	-0.166319	0.385691	0.142728	0.350398	0.0344827	0.413852	0.621767	NA	0.130096	0.299763	0.577494	0.333331	0.456619	0.822088	0.306998	0.460836	0.368718	NA	0.613499	0.410699	0.69148	0.512075	-0.0263054	0.348477	0.703282	0.976686	0.390587	1.05092	-7.58189	0.699657	0.375973	0.750506	0.158	0.45	0.177	0.223	0.177	-0.279	0.213	0.855	11.8028	high
GSM48830	Baird	-0.25795	-0.202232	-0.416762	-0.394048	-0.585502	0.279523	-0.163517	-0.0904824	-0.23297	-0.182648	-0.359033	-0.115768	NA	-0.182695	-0.256975	-0.832528	0.123153	0.03338	0.521507	-0.61209	-0.662374	-0.866361	NA	-0.329328	-0.340244	-0.398083	-0.667607	-0.517166	-0.562108	0.140929	0.251203	0.538521	-0.945878	-2.17497	-0.838256	-0.773116	-0.934421	-0.243	-0.44	-0.212	-0.271	-0.245	-0.538	-0.681	-0.368	11.5522	low
GSM48831	Baird	-0.325779	-0.58391	0.0213713	0.110142	-0.490645	-0.350528	-1.23796	-0.0633884	0.287511	0.0280234	-0.282018	1.27019	NA	-0.251183	0.0407729	-0.733969	-0.200787	0.272261	-0.0136186	-0.39921	0.15321	1.00919	NA	0.0767703	0.493001	-0.192938	-0.501484	-0.571409	0.376114	0.466735	0.0588516	0.0190509	0.515835	-4.42776	-0.228044	-0.0258102	0.00785192	-0.274	-0.627	-0.04	0.082	0.088	0.368	-0.483	-0.674	12.8381	high
GSM48832	Baird	0.252183	-0.347302	0.534911	0.0820517	-0.0122184	-0.24298	0.095811	-0.336019	-0.191698	-0.0852045	0.0211587	-2.82282	NA	-0.0254282	-1.12034	0.286629	0.0730501	0.111044	-0.485043	0.293831	0.358812	-0.545997	NA	0.0053985	-0.118368	0.143217	0.507471	0.109322	0.3707	0.353411	0.207485	0.761453	0.62396	-2.015	0.258068	0.0645248	0.316123	-0.164	0.053	-0.18	0.082	-0.17	-0.201	0.702	-0.051	12.2304	high
GSM48833	Baird	-0.00336216	0.194929	-0.474299	-0.64133	0.154718	0.0729019	0.0390994	-0.186656	-0.18028	0.0448637	-0.655446	1.26588	NA	-0.217291	-1.35886	0.311541	-0.193507	0.124733	-0.934817	-0.352474	-0.343897	0.505709	NA	-0.503991	0.522897	-0.637119	-0.399293	0.332697	1.16418	0.131946	0.432029	0.633825	-1.05866	4.22383	0.449391	0.876979	0.977688	-0.015	-0.264	0.088	0.087	0.229	0.156	-0.544	-0.038	12.7048	high
GSM48834	Baird	0.35795	-0.0779895	0.382932	0.811631	0.494825	0.0639212	-0.124572	0.22007	0.354064	0.175675	0.239051	-0.237952	NA	-0.0855544	0.915481	-0.0929031	0.108381	0.481744	0.580004	-0.514943	-0.282876	-0.303592	NA	0.124747	-0.132295	0.387607	-0.0258016	-0.835492	-0.943106	0.820261	0.381333	0.651927	0.744426	-7.28495	0.0738285	-0.245109	0.377468	-0.074	-0.173	-0.154	0.017	-0.181	-0.67	-0.209	-0.418	11.3293	low
GSM48837	Baird	0.0276804	-0.0780479	-0.114953	-0.16501	-0.0794999	-0.1829	-0.216585	-0.0621042	0.0438431	-0.325817	-0.0523611	0.480327	NA	0.107012	0.152712	-0.48304	-0.0622098	-0.166997	0.251261	-0.287411	0.149588	0.312744	NA	-0.0848258	0.257966	-0.274522	-0.138349	0.00994865	-0.536457	0.367815	0.52652	0.500098	0.0649851	-4.87864	-0.117799	0.127525	-0.514383	-0.032	0.036	0.015	0.023	-0.066	-0.274	-0.311	0.222	12.3389	high
GSM48838	Baird	0.0122224	-0.270813	-0.0536265	-0.153536	-0.786776	0.0572835	-0.193275	-0.0525598	0.00373174	-0.28655	-0.158708	-0.547427	NA	-0.102619	0.548361	-0.769062	0.19111	-0.12235	0.119054	-0.702778	-0.355	0.0957721	NA	-0.267965	-0.357306	0.0581662	-0.354419	-0.673589	-0.414116	0.263307	0.926569	0.753789	0.627004	-1.22934	-0.434116	-0.702276	-0.782125	-0.117	-0.211	-0.156	-0.247	-0.137	-0.156	-0.276	0.134	11.3651	low
GSM48839	Baird	0.173128	-0.088426	0.0628695	0.576121	0.208219	0.0158933	0.618702	0.0170107	-0.123116	0.178135	0.306166	0.912077	NA	-0.0369286	-0.330137	0.405066	0.160281	-0.832035	-0.0132777	-0.171606	-0.0306043	-0.195281	NA	-0.0431335	-0.0740704	0.16892	0.205717	0.228912	-0.877639	0.896416	0.888111	0.854405	0.42277	1.58539	-0.181311	-0.278658	0.151973	-0.015	-0.182	-0.064	0.012	0.067	-0.241	-0.111	-0.19	11.2426	low
GSM48840	Baird	0.0392779	-0.221417	-0.0969091	-0.0435816	0.532406	-0.0660503	0.184444	0.23542	0.159403	-0.209293	0.392415	0.525308	NA	0.192508	0.595037	0.11951	0.613249	-0.192046	0.51927	-0.0956831	0.168458	-0.0443306	NA	0.0830179	0.250268	0.423231	0.15857	0.250543	-0.410698	0.721965	0.718936	0.798358	0.0858476	-2.8119	0.181469	0.0327312	0.00704875	-0.011	0.173	0.068	0.035	-0.137	-0.06	0.283	0.859	12.1441	high
GSM48842	Baird	-0.672876	-0.345506	-0.677643	-0.758788	-1.00757	0.330984	-0.352601	0.224855	-0.228794	0.42238	-0.224549	-1.23029	NA	-0.115486	-0.323863	-1.06192	0.0823331	0.0608687	0.418972	-0.471895	-0.971198	0.194058	NA	-0.489391	-0.561088	-0.646874	-0.977206	-0.528412	-0.415928	0.0107717	0.623047	0.315409	-0.889462	-4.86925	-0.698825	-0.771396	-1.09411	0.166	-0.17	0.044	0.209	0.185	-0.758	-0.464	-0.101	13.3156	high
GSM48843	Baird	0.154353	-0.302013	0.328937	-0.535297	-0.604062	-0.0113068	-0.337562	-0.0320181	-0.157659	-0.102143	-0.545679	-0.55095	NA	-0.0884822	-0.906726	-0.300367	-0.414799	-0.199901	-0.416611	-0.167154	-0.129893	0.869207	NA	-0.406039	0.281643	-0.386418	-0.216783	0.0914774	0.279165	0.239048	0.28437	0.317639	-0.552499	0.817293	-0.0692917	-0.55363	0.0649577	-0.268	-0.142	0.049	-0.047	0.026	-0.174	0.05	-0.114	12.56	high
GSM48844	Baird	-0.426602	-0.323766	-0.474805	-0.943867	-0.0232839	-0.37806	-0.806565	0.0240273	-0.513317	-0.0799426	-0.346745	0.121509	NA	0.291284	-1.62483	0.13939	-0.559831	0.129521	-0.808425	-0.376109	0.119463	-0.021579	NA	-0.413966	-0.0194854	-0.386337	0.234038	0.529497	1.24829	0.217231	0.140613	0.543844	-0.377764	0.481415	-0.119709	-0.286499	-0.456718	-0.102	0.029	-0.146	-0.027	-0.121	0.409	-0.06	-0.497	12.1812	high
GSM48845	Baird	0.317782	0.0441702	0.0193565	0.666666	0.450334	0.0504055	0.159952	-0.205787	-0.0906807	-0.375529	0.0330052	0.179293	NA	0.0238362	0.22732	0.228358	-0.0275749	0.673101	0.522571	0.593705	0.390987	0.334651	NA	0.0178516	-0.131926	0.494043	0.0831273	0.761553	0.243134	0.945532	0.340733	0.256178	0.47455	4.32473	0.700507	1.06487	1.06258	-0.076	-0.179	-0.187	-0.108	-0.035	0.1	-0.026	0.089	11.8706	high
GSM48846	Baird	0.219937	0.342948	-0.461363	-0.037306	0.617533	0.0113253	-0.000844932	0.114942	-0.381398	-0.423025	-0.183033	0.0796699	NA	0.144533	0.357376	0.0837645	0.0869568	-0.055434	-0.521571	0.355064	0.0449562	0.57866	NA	-0.175072	-0.0576245	-0.298565	-0.169175	1.05466	-0.527634	0.407925	0.077282	0.665035	0.0439326	1.15021	-0.0659341	1.0051	0.387353	0	0.097	-0.081	-0.023	-0.148	-0.144	0.31	0.03	12.8878	high
GSM48849	Baird	0.238493	-0.0149338	-0.0879709	0.171458	0.580876	-0.147199	0.216508	-0.0675011	-0.0557231	-0.00520104	0.363405	0.276801	NA	-0.00608787	0.531622	0.303949	-0.0429826	0.457798	0.201229	-0.398499	0.323076	0.602802	NA	0.308488	-0.0837971	0.0592785	-0.212362	1.38063	0.485165	0.349692	0.562545	0.729704	0.341577	-0.936078	0.1699	0.357013	0.22772	0.073	0.265	0.103	0.018	-0.063	-0.06	0.338	0.831	12.2527	high
GSM48850	Baird	0.0947566	-0.201328	-0.00285131	0.466677	-0.314194	0.102222	-0.0927193	-0.0176659	0.0137059	-0.313188	0.0490058	0.164168	NA	-0.28043	0.244785	0.377568	-0.132314	-0.248647	-0.30205	0.356531	0.232406	0.117691	NA	-0.00277321	0.1921	0.157709	0.152745	-0.927558	0.904801	0.446644	0.101106	0.459766	0.222766	3.24406	0.290048	0.231921	0.3084	-0.087	0.248	0.036	-0.081	0.051	-0.156	0.622	-0.177	11.773	high
GSM48851	Baird	-0.0955656	-0.395196	-0.0300616	-0.14549	-0.607436	0.0475321	-0.177299	-0.369528	-0.124083	-0.364322	-0.243159	-0.383307	NA	-0.305341	0.811372	-0.504821	0.323365	0.0325281	0.248065	-0.502679	-0.122803	-0.463544	NA	-0.155039	-0.165493	0.0570547	-0.217785	0.443073	-0.0548892	0.343327	0.760865	0.649191	-0.669876	-3.08884	-0.588706	-0.545629	-0.726168	-0.144	-0.146	-0.162	-0.229	-0.219	-0.677	-0.212	0.258	11.5868	low
GSM48852	Baird	-0.0698682	-0.304942	-0.0570068	-0.542773	-0.255797	0.254231	-0.613192	-0.0459459	-0.21705	-0.109249	-0.3709	0.386018	NA	-0.159432	-0.291839	-0.00589777	0.407966	0.264069	0.0381839	-0.0975753	0.0699572	0.0385585	NA	-0.0399388	-0.316687	-0.220067	-0.419206	0.0904178	-0.360517	0.727266	0.0588516	0.582874	-0.262172	0.70981	-0.137463	0.0400871	-0.570513	0.167	0.025	-0.101	0.121	-0.134	-0.174	0.188	-0.118	11.6865	high
GSM48853	Baird	0.113622	-0.0443232	-0.0746325	0.0690195	0.191366	-0.157737	-0.12521	-0.386384	0.173077	0.110735	-0.0792625	-0.274749	NA	0.104718	0.207704	0.59873	-0.0984144	-0.385082	-0.58197	0.744974	-0.0159638	0.372089	NA	0.220587	-0.0141293	0.143768	0.22158	0.166092	-0.373863	0.924886	0.703336	0.939816	0.557387	4.20119	0.607266	0.591651	0.514807	0.117	0.095	-0.032	-0.013	0.118	0.089	0.29	0.343	12.0024	high
GSM48854	Baird	0.189462	0.13364	0.0137989	-0.686035	-0.67628	-0.0547387	-0.865874	-0.0140835	-0.640761	-0.655747	-0.975428	0.313132	NA	-0.294629	-0.902547	-0.605352	-0.989784	-0.788249	0.105583	0.217163	-0.746252	-0.15289	NA	-0.707189	-0.148951	-0.373364	-0.982712	-1.93322	-0.640882	0.481374	0.123501	0.471544	-0.620807	0.349764	-0.555996	-0.223324	-1.16601	-0.348	-0.754	-0.293	-0.156	0	-0.478	-1.259	-0.824	13.5112	high
GSM48855	Baird	0.239687	0.00407054	0.197221	0.085763	0.719862	-0.196336	-0.178429	0.364137	0.194025	0.216019	-0.220856	0.229664	NA	0.0491619	-0.647584	0.576474	-0.274924	0.0528824	-0.657864	0.632962	0.411511	0.152133	NA	-0.0471306	0.787763	0.233271	0.200793	2.27946	1.1695	0.528105	0.0588516	0.30485	1.29296	0.437286	1.04789	0.657263	1.10674	-0.112	0.154	0.07	-0.035	0.031	0.686	0.909	-0.287	11.9376	high
GSM48856	Baird	-0.075256	-0.461519	0.119573	0.0342063	0.178276	-0.392899	-0.0545017	0.151357	0.0010172	0.15336	-0.083195	0.304163	NA	0.0188028	0.138289	-0.327655	-0.303344	0.844304	-0.241633	-0.430953	0.0176068	-0.513881	NA	0.185028	0.0482844	0.121554	0.269236	0.302735	0.374888	0.606644	0.349267	0.207318	0.327413	-5.26771	0.202125	-0.211581	-0.403611	0.076	0.181	0.062	-0.024	-0.017	0.3	-0.081	0.365	12.4983	high
GSM48857	Baird	-0.619737	-0.3407	-0.721332	-0.9894	-0.845054	0.386297	-0.366546	-0.141238	-0.269759	-0.0247925	-0.19663	-0.835828	NA	-0.159727	-0.902068	-0.544725	-0.414195	0.0174857	-0.170154	-0.799371	-0.743896	0.562092	NA	-0.562116	-0.267951	-1.10406	-0.679852	-0.760841	0.0532096	0.0446903	0.0588516	0.497186	-0.99943	0.714719	-0.74934	-0.189877	-0.74725	-0.085	-0.066	0.05	0.048	0.033	0.48	0.028	0.091	12.6773	high
GSM48858	Baird	-0.229414	-0.209877	-0.422757	-0.452971	-0.252505	-0.192119	-0.305818	-0.187738	-0.0342455	-0.464068	-0.00363718	-0.526793	NA	-0.151618	0.583256	-0.652839	0.0849376	-0.189923	0.169736	-0.140732	-0.31861	-0.745641	NA	-0.0775877	-0.297452	-0.0595488	-0.420758	-0.523627	-0.390678	0.199063	0.753153	0.646027	-1.43925	-3.95964	-0.695363	-0.541907	-0.709248	-0.077	0.001	-0.025	-0.13	-0.039	-0.341	-0.271	0.453	10.8129	low
GSM48859	Baird	0.363457	0.250097	-0.0638276	0.59794	1.21089	0.0673246	-0.302035	-0.0563326	0.258619	0.158835	0.104097	0.583796	NA	0.245433	0.592415	0.783723	0.503007	0.464378	-0.148252	-0.289387	0.157347	0.139498	NA	-0.0505796	0.225655	0.499051	0.559035	-0.688243	0.452164	0.895379	0.291414	0.402084	1.05478	2.3847	1.19161	1.26688	0.99644	-0.032	-0.21	-0.006	0.061	0.078	0.685	-0.326	-0.041	12.4489	high
GSM48860	Baird	1.12202	0.419492	0.755082	0.73054	1.74812	0.106577	0.490004	0.339854	0.285548	0.445732	0.363108	-1.0644	NA	0.376156	1.32875	1.78024	-0.144195	-0.0484277	-0.446334	0.452204	0.907579	0.433833	NA	0.338706	0.876384	0.509208	0.668245	0.459959	0.965638	0.614519	0.398239	0.0280394	2.88055	6.41525	1.77722	1.42595	1.80475	0.089	0.328	0.103	0.103	0.281	0.529	0.041	0.132	12.4599	high
GSM48861	Baird	0.471876	-0.0937272	0.37602	0.493308	0.920765	-0.344365	-0.0327715	0.043976	0.184393	0.0886048	0.313976	0.653421	NA	0.2157	-0.0450757	1.17863	0.345622	0.219994	-0.32648	0.694423	1.02037	0.115107	NA	0.393342	0.574526	0.479317	0.920818	1.25092	0.986521	0.88939	0.180432	0.400477	1.28046	0.461387	0.911958	0.719008	1.21367	0.088	0.195	0.093	0.16	0.148	0.651	0.799	0.371	12.9451	high
GSM149099	Nakayama	-0.96497	-0.487084	-0.530984	-0.170256	-1.07529	0.170726	0.305016	0.229604	-0.381145	0.30133	0.0344619	0.582283	0.613193	0.157427	-0.493652	-0.615617	0.211875	-0.50308	0.363701	-0.704917	-0.473252	-0.679221	-0.917733	0.0241629	-0.393854	-0.68846	-0.337929	0.0403833	-0.823575	0.0057901	0.29504	0.482044	-1.41459	-3.13534	-0.953009	-1.198	-0.964132	0.076	-0.108	0.124	-0.134	-0.015	-1.044	-1.225	-0.616	9.58066	low
GSM149100	Nakayama	-0.944244	-0.205309	-0.821039	-0.259494	-0.522631	0.049314	0.281214	0.355219	-0.26436	0.14129	0.0227011	1.01513	-1.58517	-0.0595413	0.303462	-0.550081	0.518653	-0.108775	-0.150675	-0.399153	-0.441413	-0.220788	-1.65293	-0.138345	-0.376285	-0.536395	-0.383275	-0.11286	-0.926794	0.0903164	0.601017	0.183675	-1.59896	-2.3142	-0.87939	-0.841213	-0.797632	0.186	-0.177	0.121	-0.186	-0.016	-0.652	-1.036	-0.194	11.0995	low
GSM149102	Nakayama	-0.922214	-0.51901	-0.448004	-0.305748	-0.633058	-0.178412	-0.00331776	0.13049	-0.253244	0.23624	0.294462	-0.0252715	0.131912	-0.0491833	-0.0807236	-0.195804	-0.127216	0.523182	-0.0363768	-0.296645	-0.505609	-0.674569	-0.0774107	0.366436	-0.398707	-0.388271	-0.277046	-0.601278	-0.643396	0.0231685	0.333729	0.327949	-1.42202	-3.72546	-0.898349	-1.30925	-1.00752	0.016	-0.284	-0.053	-0.283	-0.156	-0.729	-1.176	-0.265	7.54789	low
GSM149103	Nakayama	-0.422255	-0.149123	-0.30348	-0.151114	-0.441665	-0.330289	0.218323	0.0856444	0.341029	-0.379526	0.0628643	-0.235814	-1.2343	-0.0938022	-0.0685322	-0.196469	-0.0338405	0.0882952	0.315415	-0.53161	0.076329	-0.342025	-0.847422	-0.198765	-0.178984	0.0709474	-0.176655	-0.351407	-0.396485	0.868262	0.962959	0.996152	-0.9441	-2.2164	-0.607694	-0.951173	-0.651879	-0.067	-0.049	-0.042	-0.087	-0.238	0.333	-0.11	0.432	10.8306	low
GSM149104	Nakayama	-1.20052	-0.619582	-0.645487	-0.18652	-0.966321	0.0533513	-0.070265	-0.0797971	-0.418176	-0.0124681	-0.156108	-1.16724	0.844518	-0.206101	-0.328404	-0.291554	0.08227	-0.344388	0.119764	-0.868783	-0.234524	0.0714998	0.0365892	0.187296	-0.416177	-0.218044	-0.501402	-2.09975	-1.05567	0.357703	0.194653	0.588251	-1.78108	-0.138472	-1.06752	-1.19156	-1.42196	0.012	-0.096	-0.086	-0.239	-0.068	-0.485	-0.56	-0.154	11.6086	low
GSM149105	Nakayama	-1.18644	-0.450004	-0.818266	-0.146264	-0.673306	0.120712	0.15388	0.106747	-0.554545	0.0847715	-0.278686	0.126012	0.49132	0.0749877	-0.965316	-0.205917	0.00855558	-0.062644	0.0273711	-0.915533	-0.283609	-0.570808	-1.8468	0.000273909	-0.354969	-0.358974	-0.556771	-1.22633	-1.32582	0.0569235	0.52365	0.555559	-0.33205	-1.81156	-0.733014	-0.951751	-0.771469	-0.025	-0.368	-0.016	-0.075	-0.043	0.156	-0.839	-0.191	10.7463	low
GSM149107	Nakayama	-0.931916	-0.121839	-0.900086	0.0403971	-0.292662	-0.464544	-0.192379	0.122135	-0.323438	-0.337621	0.0526691	0.121736	-0.442519	-0.292415	0.207859	-0.479247	0.118483	-0.392101	-0.0582437	-0.640582	-0.11464	-1.26458	-0.218033	-0.194414	-0.240061	-0.191429	-0.346575	-0.345368	-0.558579	0.218936	0.650155	0.669524	-1.26654	-3.74926	-0.903489	-1.10675	-0.947419	-0.157	-0.226	-0.354	-0.428	-0.474	-0.496	-0.688	0.047	7.79768	low
GSM149108	Nakayama	-0.447223	0.103753	-0.612196	0.156309	-0.720235	-0.295363	-0.308546	-0.0177319	-0.437316	0.0474202	-0.0146834	0.148418	1.62699	-0.307813	-0.405699	-0.430659	-0.0873265	0.0206301	0.625665	-0.478159	-0.525608	-0.333655	0.349918	-0.0294331	-0.683039	-0.390956	-0.432453	-1.4913	-0.131455	0.0844332	0.845326	0.661183	-1.5958	-5.85643	-0.788263	-1.67351	-1.26564	-0.446	-0.588	-0.326	-0.437	-0.494	-0.851	-0.934	-1.215	7.78811	low
GSM149109	Nakayama	-1.12684	-0.533634	-0.659121	-0.255287	-0.597613	0.132599	0.00938592	0.051235	-0.580156	0.531439	-0.389377	0.345645	2.01512	0.213222	0.0759679	-0.549922	-0.196392	-0.430543	0.377186	-0.964813	-0.391586	-0.574209	-1.5362	-0.183345	-0.528015	-0.407304	-0.376527	-0.346123	-0.792843	0.0289798	0.556138	0.0410774	-0.771572	0.775345	-0.19535	-0.786697	-0.620884	-0.187	-0.462	-0.045	-0.205	-0.097	-1.156	-1.022	-0.65	11.0516	low
GSM149110	Nakayama	-1.07778	-0.508652	-0.632368	-0.573486	-0.973791	0.1631	-0.0682234	0.18113	-0.437567	0.00393503	-0.153881	-0.0741241	-0.0947553	-0.0118404	0.0881883	-0.278849	0.297926	-0.144978	-0.0542041	-0.409227	-0.117592	-1.00966	-1.41333	-0.0810954	-0.328238	-0.309985	-0.463917	0.268362	-1.23244	0.107491	0.147969	0.35919	-1.39073	4.6023	-0.599971	-0.747759	-0.913118	0.069	-0.271	0.194	-0.131	0.11	-0.018	-0.769	-0.016	11.5818	low
GSM149111	Nakayama	-1.21547	-0.682283	-0.592426	-0.132677	-1.09261	0.0532578	0.0296833	0.264593	-0.537967	-0.013353	-0.0858118	-0.636461	0.50995	0.215544	0.0747852	-0.396577	0.23402	-0.500624	0.0907828	-0.902178	-0.375679	-0.268197	-1.2884	0.0329115	-0.406281	-0.422603	-0.55633	-1.20897	-1.46833	0.0268066	0.621576	0.486187	-1.48658	0.571305	-0.905908	-1.26446	-1.24255	0.118	-0.218	0.065	0.122	0.086	-0.371	-0.769	-0.258	11.0507	low
GSM149112	Nakayama	-0.715671	-0.325299	-0.433747	-0.0299815	-1.11251	0.504421	-0.00490248	-0.0681566	-0.486179	0.229453	-0.174855	0.0724487	0.419128	0.150307	-0.567278	-0.29935	0.187556	-0.296609	-0.0550372	-0.11367	-0.362043	-1.01778	-0.462416	-0.198541	-0.164089	-0.657093	-0.275411	-0.00943979	-1.13114	0.0648934	0.292257	0.0492524	-0.885252	3.1864	-0.40142	-0.723856	-0.542542	0.021	-0.344	0.076	-0.024	0.182	-0.425	-1.04	-0.376	11.5053	low
GSM149113	Nakayama	-0.892557	-0.207801	-0.760841	0.0484199	-0.622538	-0.302178	0.190448	-0.244729	-0.228082	-0.2372	-0.119803	-0.476276	0.52237	-0.144648	-0.861029	-0.651057	-0.360682	-0.335112	-0.00854497	-0.136139	-0.25081	-0.572978	-1.6461	-0.123774	-0.367621	-0.0912216	-0.200403	-3.74995	-0.28522	0.0936488	0.77785	0.968224	-1.98881	-1.90643	-0.948704	-1.06797	-1.31451	-0.449	-0.522	-0.315	-0.273	-0.338	-0.012	-0.846	-0.366	10.6793	low
GSM149114	Nakayama	-0.717758	-0.450604	-0.296837	-0.243274	-0.372714	-0.452048	-0.201726	-0.697535	0.0632709	-0.304051	-0.126592	0.771644	1.20936	-0.0897646	-0.772912	-0.149993	0.0177318	-0.123321	0.130813	-0.260049	-0.505248	-0.545381	-0.536141	0.205448	-0.103882	0.258297	-0.264091	-0.580141	-0.386926	0.321402	0.33363	0.875306	-1.38914	-2.78557	-0.358578	-0.639816	-0.365047	-0.403	-0.258	-0.333	-0.306	-0.438	-0.579	-0.454	-0.167	8.65615	low
GSM149115	Nakayama	-0.328125	-0.168866	-0.176954	-0.0334265	0.142851	-0.636529	-0.244052	-0.40699	0.173752	-0.38472	-0.0434719	-1.12771	-0.636584	-0.287124	-0.433337	0.128357	0.0759036	0.539638	0.327513	0.664648	-0.062814	0.779244	1.65375	0.101524	0.35878	-0.00961643	0.121951	1.10932	-0.592804	0.919473	0.609864	0.913653	0.333856	-0.94592	0.0321487	0.423007	0.318719	0.094	-0.207	-0.094	-0.077	0.009	0.051	0.093	0.169	13.8931	high
GSM149116	Nakayama	-0.439498	-0.383752	-0.06194	0.00696701	-0.3317	-0.217511	-0.46504	-0.525298	-0.188009	-0.301367	-0.0294477	-1.365	-0.82211	-0.595451	0.398678	-1.19299	0.00991824	0.510867	-0.480349	0.444284	0.173955	-0.754064	-1.10478	0.218901	-0.569414	-0.23523	-0.284922	-0.796041	-1.36274	0.5031	0.965469	0.447407	-1.30568	-2.85311	-0.232807	-1.09508	-0.606438	-0.417	-0.65	-0.407	-0.376	-0.517	-0.815	-0.762	-0.561	12.1427	high
GSM149117	Nakayama	-0.247701	-0.0373025	-0.233776	0.314182	0.0475989	-0.900489	-0.283262	-0.55221	0.0390847	-0.540813	0.0440622	0.294752	0.461046	-0.797583	0.364086	-0.0130362	-0.0138411	0.624656	0.0538296	0.281853	-0.0168283	-0.37028	1.65853	-0.243696	0.392117	0.257701	0.372917	0.356685	0.246709	0.912456	0.3025	0.899906	0.345115	-0.758918	-0.0854182	0.510751	0.632159	-0.504	-0.539	-0.586	-0.559	-0.68	0.299	0.058	0.717	13.7247	high
GSM149118	Nakayama	-0.372085	0.362481	-0.816184	0.147432	0.0610985	-0.179272	0.00142397	0.00657545	0.144755	-0.37504	0.0234453	-0.197849	-1.02394	-0.185602	-0.333583	0.264342	0.223544	0.259353	0.238969	0.308593	-0.357627	0.308095	1.3254	-0.0331234	-0.607466	0.344659	-0.160688	1.06704	-0.423814	0.513144	0.238386	0.708464	0.227927	-2.97125	0.35261	0.542529	-0.117994	-0.268	-0.266	-0.36	-0.277	-0.478	-0.512	-0.464	-0.274	13.3419	high
GSM149119	Nakayama	-0.439024	-0.282931	-0.173437	-0.175935	-0.383025	-0.101971	-0.232399	-0.464539	-0.120819	-0.324636	0.0700934	-0.519139	-0.864028	0.00197768	-1.14217	-0.587706	0.0339736	0.308608	0.00204269	-0.111285	-0.0915433	-0.633328	-0.461051	0.175948	-0.392377	-0.204266	-0.481593	0.0109424	-0.406447	0.276378	0.902334	0.360857	-1.24557	0.851754	-0.573444	-0.670755	-0.954408	-0.094	-0.251	-0.079	-0.133	0.135	-0.473	-0.548	-0.762	12.3312	high
GSM149120	Nakayama	-0.613337	-0.243373	-0.411072	0.0655015	-0.0736785	0.0612951	-0.0379961	-0.482889	-0.247664	-0.54266	0.0992776	-0.532842	-0.854713	-0.42178	-0.379674	-0.317562	-0.0114906	-0.221985	0.456733	0.362534	-0.260373	-0.259348	0.583379	0.220343	-0.470321	-0.183792	-0.172181	1.55848	0.0207598	0.941935	0.357091	0.926142	-0.516575	-3.87596	-0.605371	-0.764911	-0.711651	-0.159	-0.259	-0.231	-0.288	-0.306	-0.51	-0.318	-0.031	13.405	high
GSM149121	Nakayama	-0.378905	-0.111151	-0.297505	-0.258781	-0.0939848	0.115527	0.125393	-0.0949918	-0.127637	-0.318637	-0.181839	-0.176793	-0.617954	-0.119023	-0.0815724	-0.34076	-0.0187556	-0.364785	0.0898324	0.111995	-0.0970506	-0.110749	-0.372991	0.276366	-0.0182762	0.192792	-0.449768	0.6058	-0.238084	0.952807	0.853868	0.923746	-0.214294	-0.774168	-0.422545	-0.0823864	-0.2474	0.119	-0.075	-0.013	0.044	0.038	-0.097	-0.04	0.034	13.6079	high
GSM149122	Nakayama	-0.754955	-0.280327	-0.527365	0.0632329	-0.215832	0.18656	-0.0564867	-0.157682	-0.0342216	-0.19155	0.0605742	-0.157958	0.773878	0.182858	-0.765132	-0.49028	-0.147848	0.224132	0.0646	0.0646502	-0.0424873	-0.550666	-0.981218	0.0952253	-0.196462	0.0391436	-0.475029	0.193627	-0.540987	0.560294	0.573684	0.602401	-1.06721	0.189786	-0.602902	-0.896775	-0.773832	-0.014	-0.079	0.19	0.026	0.116	-0.454	-0.508	-0.413	13.7151	high
GSM149123	Nakayama	-0.395143	0.0206139	-0.461953	0.211363	0.219605	0.13811	-0.158944	-0.46336	0.162213	-0.224211	0.127368	-0.498033	1.04169	0.0341398	0.00606962	0.159468	0.262036	-0.00794238	0.146408	0.292211	-0.0478785	0.946403	0.870768	-0.0351833	-0.388291	0.300048	0.00673717	1.67322	-0.0982957	0.755609	0.583347	0.710459	0.139691	3.72546	0.573919	0.1545	-0.180841	0.126	-0.058	0.13	0.337	0.317	-0.054	-0.323	-0.543	13.8347	high
GSM149124	Nakayama	-0.317807	0.188438	-0.562495	0.228738	-0.127467	-0.617245	-0.783592	-0.289232	-0.0981932	-0.38695	0.220552	-0.69163	-0.200327	-1.01672	0.143395	-0.288322	-0.0396195	0.00609358	0.221098	-0.140143	-0.132405	0.461505	1.34725	-0.0739139	-0.321722	0.133789	0.0874347	-0.784718	-0.811947	0.518212	0.845424	0.623453	-0.320486	-7.18871	-0.223233	-0.531202	-0.769499	-0.581	-0.747	-0.532	-0.418	-0.63	-1.04	-0.907	-0.705	14.3477	high
GSM149125	Nakayama	-0.445134	-0.0138554	-0.479198	0.211382	-0.459883	0.0290347	-0.136999	-0.469683	-0.381091	-0.422898	0.207776	0.153118	-0.565168	-0.261837	-0.284523	-0.503577	-0.00706242	-0.236211	0.552777	0.0607272	-0.0882368	0.0839193	0.885786	0.154103	-0.68815	0.359363	-0.0519586	1.04288	-1.1427	0.622951	0.359271	0.614934	-0.666939	-0.461649	-0.337968	-0.559928	-0.96556	-0.194	-0.287	-0.282	-0.215	-0.31	-0.311	-0.264	-0.281	13.4136	high
GSM149126	Nakayama	-0.932061	-0.321748	-0.678126	0.00558768	-0.292659	0.23194	0.356505	0.225926	-0.0252043	-0.180258	-0.078133	-0.878147	0.977258	0.0823998	-0.971538	-0.223651	0.214317	-0.346552	0.0717229	-0.214507	-0.176626	-0.0545583	-1.60924	0.209514	-0.347048	-0.476766	-0.362091	1.30785	-0.246207	0.442709	0.51573	0.376656	-0.349268	2.20649	-0.256535	-0.0920324	-0.636084	0.048	0.014	-0.076	-0.077	-0.053	-0.4	-0.336	-0.567	13.0222	high
GSM149127	Nakayama	-0.528795	0.00600723	-0.594225	-0.0769447	-0.38088	0.315396	-0.209427	-0.269906	-0.0755851	-0.441711	-0.146358	0.499034	1.04246	0.0848265	-0.566495	-0.161795	0.042222	0.0856601	0.378125	-0.169328	-0.0900956	0.126923	0.156733	0.13249	-0.611213	0.120029	-0.165338	0.679025	-0.741167	0.387616	0.159799	0.197217	-0.575135	2.11421	-0.18295	-0.240596	-0.28321	-0.075	-0.181	0.016	-0.076	-0.07	-0.352	-0.601	-0.527	13.1361	high
GSM149128	Nakayama	-0.305696	-0.259001	-0.0518828	0.144195	-0.588313	0.358367	-0.00352471	-0.471333	-0.133936	-0.184251	0.0136239	-0.546641	0.374881	0.132941	-0.407474	-0.187026	-0.0417126	4.68518e-05	0.153477	-0.0449585	-0.152749	-0.189635	0.94108	0.181471	-0.342088	0.337916	-0.0326343	0.6058	-0.361705	0.364712	0.617845	0.440301	-0.100827	0.571186	0.162475	-0.195261	-0.326537	0.133	0.021	0.063	0.227	0.253	-0.149	-0.358	-0.239	13.4079	high
GSM149129	Nakayama	-0.472918	0.112729	-0.650719	-0.0734033	-0.03535	0.440134	0.0578369	0.0485347	0.0565906	0.0315392	0.148524	-0.707117	-1.41284	0.243738	-0.70686	0.0556526	-0.0986917	-0.497733	0.016815	-0.00852899	-0.0151565	0.422641	0.65096	0.129197	-0.361831	-0.107772	-0.164874	0.839818	0.000162694	0.303784	0.554887	0.202543	0.164613	2.42186	0.257289	0.242044	0.101036	0.217	0.05	0.042	0.129	0.17	-1.005	-0.716	-0.756	11.9369	high
GSM149130	Nakayama	-0.207109	-0.273567	0.0738417	-0.293358	-0.47477	-0.453263	0.13404	0.107549	0.15626	-0.186971	0.127969	-1.22202	-0.797269	-0.318157	0.304	-0.319819	-0.0398299	-0.0348999	0.49867	0.409155	-0.0549832	-0.103349	-0.568907	0.0831218	0.156804	-0.0354376	0.352135	0.396694	0.140072	0.761447	0.901954	0.659783	-0.371509	-4.3575	-0.353589	0.0466069	0.28333	-0.023	-0.014	-0.181	-0.145	-0.176	-0.051	0.518	0.35	13.0069	high
GSM149131	Nakayama	-0.381653	0.0243179	-0.451079	0.387595	0.13578	0.0282162	0.185212	0.252142	0.305841	-0.250864	0.123219	-0.694403	-0.909051	0.0947555	0.412783	0.357432	-0.162615	-0.184328	0.265903	-0.102208	-0.0281615	0.421972	1.47012	0.187142	-0.014103	-0.0900314	-0.175823	1.1229	0.229671	0.890597	0.942972	0.768182	0.0772716	-4.86153	0.176293	0.30319	0.760382	0.249	0.21	0.017	0.195	-0.007	0.053	0.434	0.563	12.6308	high
GSM149132	Nakayama	-0.829644	-0.256111	-0.637259	8.35544e-05	-0.0821338	0.196664	-0.0137258	0.0632565	-0.169058	-0.355303	-0.189539	-1.06312	0.638033	0.324817	-0.589459	0.0804139	0.00381696	0.0929282	-0.777053	-0.237958	-0.0375334	-0.143175	0.602493	-0.135859	-0.367965	0.0974145	-0.0193115	0.491811	-1.04726	0.50327	0.570752	0.222926	0.0134719	-0.388589	-0.133477	-0.0289069	-0.255839	0.109	0.007	-0.028	0.093	0.138	-0.424	-0.602	-0.643	12.4508	high
GSM149133	Nakayama	-0.26974	-0.00485242	-0.29432	-0.169183	-0.302081	-0.412107	-0.00439054	0.296677	0.0951987	-0.363642	0.0159617	0.0958782	-1.1885	-0.0748275	0.22589	0.296035	0.0297282	-0.406337	0.470106	-0.395598	-0.690101	0.781685	1.10423	0.246354	-0.622937	-0.243813	-0.0180388	2.17825	-0.503069	0.80972	0.905728	0.849909	-0.361159	-8.05431	0.0838708	-0.165258	-0.170773	-0.061	-0.131	-0.18	0.029	-0.372	0.033	-0.252	-0.019	12.9897	high
GSM149137	Nakayama	-0.00704246	0.318439	-0.361646	0.595706	0.370659	-0.474813	-0.0222075	-0.0676274	-0.132571	-0.573343	0.282171	0.22103	-0.0916503	-0.189865	0.396259	0.261364	-0.350883	-0.109571	-0.905649	0.417674	0.210051	0.0845111	1.15679	-0.200762	-0.0020335	1.22633	0.180365	0.355175	0.324943	0.916784	0.870563	0.917672	0.651876	-0.546257	0.116324	0.216403	0.570452	-0.333	-0.05	-0.359	-0.462	-0.378	0.496	0.998	-0.284	12.4556	high
GSM149138	Nakayama	-0.624025	-0.266833	-0.39688	-0.216215	-0.0509054	-0.162807	0.369599	0.137801	0.255938	-0.0780776	0.175389	-0.636513	-0.0380884	-0.0346827	0.0659868	0.095601	0.0234672	-0.469178	0.0864425	0.839047	0.365848	-0.270257	1.06941	0.00728901	0.568082	0.153343	0.135431	0.2125	0.637923	0.706947	0.600136	0.784078	0.10543	0.731407	-0.21266	0.0094243	-0.286694	0.244	0.348	0.145	0.104	0.162	0.511	0.998	0.275	14.2807	high
GSM149139	Nakayama	-0.319463	-0.0562182	-0.292494	-0.14138	0.296346	-0.240426	0.0399758	0.270576	-0.125726	-0.470917	0.0406599	-0.102951	-0.866357	0.453802	-0.784903	-0.00678708	-0.0817315	0.0544583	0.211067	0.211914	0.137745	0.141882	0.60181	0.200617	0.26293	0.140968	0.282289	0.788485	0.260095	0.885764	0.981066	0.703733	0.565741	0.925323	0.232136	0.331761	0.0918842	0.17	0.198	0.031	0.088	0.022	0.622	0.796	0.012	12.8298	high
GSM149140	Nakayama	0.0610734	0.260248	-0.221305	0.0608531	0.917861	0.0973612	-0.0435199	0.217619	0.103004	-0.038758	0.307551	-0.144336	1.33744	0.225746	0.379825	1.08987	-0.144098	0.407126	0.320018	0.542537	0.351252	0.817539	0.721954	-0.0435357	0.372604	0.725637	0.30243	1.70342	0.922355	0.73328	0.673283	0.844699	1.24981	1.78543	0.981992	0.729476	0.872802	0.303	0.233	0.115	-0.019	0.146	0.292	0.913	0.176	12.5025	high
GSM149141	Nakayama	-0.38314	0.17074	-0.615423	0.182673	-0.11348	0.0543344	0.264514	0.430115	0.0789606	-0.329426	0.201252	-0.514164	-1.64883	-0.290742	0.667329	-0.137887	0.113134	0.324875	0.245069	-0.239028	0.359229	-0.534667	0.690553	0.174492	-0.0998683	0.268721	-0.415752	0.850386	0.368577	0.532943	0.308613	0.912757	-0.237571	-3.38859	-0.284292	0.129152	0.0213128	0.015	0.289	0.094	-0.176	-0.171	-0.288	0.108	0.326	11.6603	low
GSM149142	Nakayama	-0.538956	0.236278	-0.861371	0.0841083	0.661252	0.260263	-0.0665879	0.138055	0.35854	0.212815	0.197349	-0.0751731	-1.12485	0.450771	0.456291	0.442199	0.359981	-0.0496542	0.0870677	0.202507	0.143435	0.156197	0.6612	0.198581	0.0483773	-0.14901	-0.0256713	0.347626	1.41853	0.901385	0.583538	0.824684	0.443998	0.908311	0.415724	0.830069	1.20738	0.36	0.484	0.14	0.135	0.157	0.745	1.352	0.582	12.0613	high
GSM149143	Nakayama	-0.607787	-0.0942677	-0.570577	0.0349512	0.247191	0.498216	0.0792874	0.0589226	0.0942374	0.148346	0.227352	-0.539946	-0.221285	0.249525	-0.251407	-0.205348	0.0464188	0.238111	-0.602149	0.527616	0.0250663	-0.0413973	0.0133796	0.160965	-0.0492871	-0.414994	-0.048804	-0.0313318	0.367469	0.37438	0.424082	0.204597	-0.0567385	-1.87764	-0.0766256	-0.205091	-0.0723271	0.177	0.553	0.184	0.26	0.151	0.032	0.703	-0.169	11.5283	low
GSM149144	Nakayama	0.712679	0.97908	-0.296001	1.57563	1.86861	0.502691	0.567868	0.530099	0.496791	0.388168	0.225346	-0.592975	0.889541	0.504611	1.24061	1.21898	-0.179086	0.0721319	0.52562	1.17846	0.308062	1.05042	0.740385	-0.120933	0.404388	0.606858	-0.0550831	0.177019	0.656992	0.70666	0.0706594	0.37628	2.09255	4.59494	1.69469	1.82722	1.88739	0.104	0.302	-0.02	0.104	0.181	0.563	0.926	-0.071	10.0487	low
GSM149145	Nakayama	-0.663846	-0.243453	-0.467104	-0.235347	-0.150621	0.390329	0.00923657	0.169807	0.0937596	-0.0756895	0.142046	-0.170251	0.61785	0.289979	0.505364	0.167888	0.0859453	-0.347288	-0.786209	-0.212372	-0.0913936	-0.470223	-1.13208	0.314783	0.0473217	0.134849	-0.267837	1.02326	-0.780544	0.377428	0.830619	0.937301	0.594495	-2.47241	-0.290547	-0.518178	-0.872937	0.221	0.353	0.314	0.064	0.106	-0.18	-0.031	0.328	12.6461	high
GSM149146	Nakayama	0.744748	0.336534	0.453571	0.0906187	0.750849	0.266451	0.133848	-0.0323651	0.148621	0.247012	0.355147	0.156748	-2.17435	0.307773	0.381607	0.669864	-0.489676	0.301621	0.0576089	-0.657337	0.0999049	0.60621	-0.400979	0.343703	0.494017	-0.111662	0.427277	-0.257046	0.595283	0.219453	0.491589	0.258291	1.41735	4.47261	0.672848	0.966692	0.497989	0.06	0.029	0.232	0.597	0.218	0.444	-0.623	0.249	10.2085	low
GSM149147	Nakayama	-0.286738	-0.08765	-0.221209	-0.237218	0.108802	0.0527067	0.0913491	0.0284975	-0.0308364	-0.158235	0.222506	-0.0530175	0.516937	0.133585	0.425464	0.319655	-0.0458171	-0.49927	-0.198354	0.212101	0.174458	-0.102713	0.57314	0.343069	0.152911	0.0369306	0.570926	0.869259	0.877564	0.714133	0.671631	0.649921	0.0463011	-2.89725	0.394658	0.170723	0.199048	0.257	0.438	0.164	0.071	0.061	-0.123	1.25	0.138	12.1532	high
GSM149148	Nakayama	-0.322584	-0.176181	-0.16267	0.0562331	0.0872516	0.332246	0.0318211	-0.00295758	0.00996047	-0.345498	-0.298323	-0.134779	1.00365	0.308235	-0.141338	-0.0164516	0.0491581	-0.362734	-0.392891	0.116518	0.237295	0.151757	0.180625	0.10521	0.369852	0.384756	0.213032	1.01193	0.674392	0.751949	0.455717	0.681659	0.318409	1.17642	0.0282561	0.326401	0.368727	0.149	0.421	0.083	-0.006	0.144	0.26	0.878	0.25	12.0192	high
GSM149149	Nakayama	-0.245202	0.0866422	-0.368716	-0.159026	0.318571	-0.0215617	-0.00108656	0.133446	-0.0732128	-0.336672	-0.15405	0.0850251	0.589905	0.186475	0.810162	-0.0282047	0.0131	-0.195747	0.0380724	0.409381	0.395018	0.558979	0.913092	-0.0524741	-0.0645053	-0.00925018	0.00950964	1.08214	0.392168	0.698025	0.610645	0.615789	-0.105175	-0.357857	0.0645422	0.133931	0.253241	-0.108	0.146	-0.066	-0.198	-0.216	-0.313	0.664	0.093	12.6528	high
GSM149150	Nakayama	-0.495032	-0.061736	-0.48144	-0.0903662	0.0926211	-0.203598	0.0556472	-0.15593	-0.0551078	-0.0922281	-0.138255	0.106718	0.0581677	-0.289037	-0.832947	0.253369	-0.144124	0.281289	0.3671	0.482378	0.247323	-0.115156	-0.230321	0.0266545	0.248911	0.170285	-0.145488	0.523516	0.662892	0.641554	0.558624	0.788276	-0.116664	-6.32325	-0.0513374	0.0488687	0.392492	0.051	0.17	0.083	-0.063	-0.093	0.057	0.25	0.614	12.6748	high
GSM149151	Nakayama	-0.197611	-0.0897239	-0.119875	0.370695	0.0749714	0.0480971	0.128513	0.35565	-0.177019	-0.321062	0.171077	0.0402921	1.32114	-0.291512	0.193736	-0.0657369	-0.113612	-0.0202088	0.148971	0.725396	0.156732	-0.564727	1.3964	0.360319	0.3654	0.0779083	0.372349	1.42335	0.4706	0.944974	0.952682	0.906707	-0.633103	-2.19237	-0.393601	-0.264757	0.435706	0.273	0.021	-0.034	0.262	-0.067	0.17	0.419	-0.032	12.2661	high
GSM149152	Nakayama	-0.706551	-0.0223568	-0.760216	-0.0513631	0.271906	-0.786141	-0.391209	-0.705852	0.0327301	-0.407283	-0.139949	1.01219	1.73722	-0.113838	-0.343121	-0.112779	-0.10415	-0.00884126	-0.145585	0.58195	-0.122454	0.0877016	1.13358	0.0056196	-0.212157	0.270241	0.254785	-0.0260475	-0.0114165	0.493099	0.497631	0.190776	-0.732983	-0.580397	-0.0967587	-0.144583	-0.006965	-0.452	-0.353	-0.605	-0.253	-0.397	-0.179	0.168	-0.466	11.4689	low
GSM149153	Nakayama	-0.680596	-0.143412	-0.59687	-0.147635	-0.287959	0.296235	-0.237089	0.268379	0.106683	0.0666783	0.28465	0.0748441	0.267758	0.295753	0.216291	-0.253503	-0.0721591	-0.349	-0.747793	0.24893	-0.147266	-0.826801	0.687822	0.269248	-0.0889429	0.121891	-0.131268	1.37202	-1.14631	0.398371	0.766332	0.734207	0.436741	-0.51103	-0.380486	-0.0116102	-0.79385	0.274	0.428	0.402	0.156	0.15	0.132	0.056	0.413	13.0892	high
GSM149154	Nakayama	-0.723366	-0.386476	-0.374322	-0.291367	-0.587951	0.247371	0.345489	-0.0783411	-0.431904	0.130077	-0.148198	-0.114195	-2.16038	-0.0136642	0.00790068	-0.576081	-0.0786258	-0.698838	-0.461974	0.13065	-0.316905	-0.636265	-0.399614	0.0285871	-0.276252	-0.226789	-0.240621	-0.392927	0.300352	0.324753	0.95447	0.215498	-0.286002	-4.91367	-0.611077	-1.6119	-0.879449	0.073	0.492	-0.04	0.146	0.102	-0.437	0.702	-0.203	13.7984	high
GSM149155	Nakayama	0.0575879	0.562106	-0.560576	0.900038	1.10868	0.185851	0.214386	-0.00313198	0.199759	0.462363	0.213269	-0.243694	-0.51704	0.37974	0.957472	0.835865	-0.179411	0.300909	-0.600106	-0.0282921	0.181857	1.14893	-0.871314	-0.0640176	0.0477481	0.215221	0.0263037	-0.325741	-0.0922979	0.530641	0.0933705	0.240946	1.53678	5.49031	1.31522	1.57439	1.02028	-0.129	-0.02	-0.037	0.047	0.113	0.214	-0.043	-0.126	7.39476	low
GSM149156	Nakayama	0.0499387	0.376534	-0.362884	-0.20025	0.783503	0.300656	-0.00268114	-0.111848	0.0612752	0.601237	-0.0668129	0.914134	0.343831	0.331181	0.659422	-0.0406109	-0.300374	-0.376991	0.203934	0.2041	0.22307	0.611591	-1.40786	-0.0449436	0.180881	-0.040462	-0.104334	-0.384623	0.393141	0.2226	0.0571148	0.0404479	1.13641	7.77245	0.621686	1.32513	0.823816	-0.102	0.08	0.027	0.252	0.067	0.584	0.315	-0.367	7.53353	low
GSM149157	Nakayama	-0.690037	-0.0766578	-0.681533	-0.113123	-0.0175045	0.167964	0.257524	0.155547	0.302886	0.411324	0.110689	0.347609	-1.8786	0.134919	0.560395	0.0256227	-0.157979	-0.0529049	-0.228606	0.62793	-0.157163	0.221214	-1.90892	-0.00724137	0.160963	-0.401012	0.295608	-1.48073	0.69556	0.589228	0.0832322	0.257989	0.746882	3.10132	0.32402	0.609688	0.394171	0.022	0.268	0.079	0.116	0.243	0.446	0.988	0.088	10.3961	low
GSM149158	Nakayama	-0.272396	-0.278132	0.00637306	-0.280305	0.46993	0.30681	0.110457	0.378417	0.162073	-0.139963	-0.0087857	-0.0816597	-1.01229	0.338377	0.359372	0.719394	0.162117	0.380198	-0.0136003	1.44645	0.276766	0.49109	0.605906	-0.155302	0.536146	0.531998	0.315997	0.870014	0.578858	0.928252	0.357562	0.725224	0.261834	-0.676492	0.294127	0.437281	-0.00407834	0.092	0.433	0.217	0.29	0.238	0.529	1.111	-0.142	11.0363	low
GSM149159	Nakayama	-0.672992	-0.350796	-0.357996	-0.0934501	-0.590495	0.0686805	-0.00590867	0.341059	-0.0408481	0.42219	-0.00761655	0.668989	1.01995	0.289943	-0.0754017	-0.332571	0.420755	0.385989	-0.527735	-0.548183	-0.222036	-0.216305	-1.40718	-0.133383	0.0659988	0.134424	0.114223	-0.737914	0.182175	0.293167	0.164608	0.0272682	-0.0146037	3.07277	-0.0895953	0.0166286	-0.533089	0.035	0.058	0.204	0.225	0.201	0.185	0.017	-0.155	10.0228	low
GSM149160	Nakayama	-0.81219	-0.570616	-0.268416	-0.265877	-0.291929	0.315722	-0.0239054	-0.117334	0.241554	0.191506	0.0416529	0.0755885	-0.982795	-0.0562218	0.228799	0.053953	0.00470452	0.136204	-0.362336	0.457473	0.221104	0.40253	-0.674033	-0.0159513	0.150923	0.335728	0.228885	-0.441995	0.911428	0.588102	0.0571148	0.163314	-0.131033	2.08829	-0.124228	0.22293	-0.562995	0.249	0.366	0.296	0.231	0.381	0.538	0.915	0.057	11.4144	low
GSM149161	Nakayama	-0.141492	0.331165	-0.525175	0.0294193	0.521306	-0.221054	-0.0445604	-0.158976	0.0554737	0.287485	0.248236	-0.208306	0.14278	-0.0198169	0.565645	0.331677	-0.219246	0.384889	0.657112	0.0805343	0.276391	0.568285	1.07829	-0.0185923	0.0834165	0.0914326	0.119105	0.8602	0.545468	0.690334	0.53125	0.670093	0.767142	-0.930931	0.513292	0.489864	0.674764	-0.005	0.163	-0.046	0.008	-0.12	0.259	0.945	0.014	7.70006	low
GSM149162	Nakayama	-0.674981	0.0478818	-0.80318	0.14936	0.0465454	0.243373	0.00856781	-0.120972	0.12533	0.321884	0.101065	-0.12033	-0.315989	0.0939169	-0.172551	0.405868	-0.144954	-0.0966718	-0.297503	0.623684	0.36874	0.3178	-0.679494	0.240493	0.376811	0.328278	0.148869	-0.37028	0.585338	0.162161	0.085275	0.144558	0.396703	-1.07775	0.0825044	0.463609	-0.0596138	0.169	0.367	0.146	0.219	0.175	0.213	0.614	0.241	11.3474	low
GSM149163	Nakayama	0.140047	0.459776	-0.355254	0.416407	0.875393	0.304295	0.335836	0.307555	0.23617	0.313942	0.364829	-0.757379	0.711778	0.165645	0.246564	0.528884	-0.120576	-0.0228883	-0.329658	0.810333	0.339398	0.528716	0.356745	0.187828	0.290179	0.261197	0.238226	0.665437	-0.023758	0.443005	0.22786	0.203588	1.25435	6.55874	1.07213	1.37706	1.22596	0.221	0.117	0.09	0.218	0.238	1.002	0.391	0.234	11.9953	high
GSM149164	Nakayama	-0.736768	-0.334297	-0.44719	-0.315408	-0.196094	-0.36395	-0.0928286	-0.11766	-0.126325	0.2381	-0.115786	0.531229	0.28173	-0.23392	-0.300078	-0.740208	-0.0501497	-0.0897416	-0.308359	0.106598	0.0514536	-0.305638	-1.47203	0.0999256	-0.0597651	-0.0310074	0.033404	-0.698659	0.0527242	0.674277	0.0873315	0.718144	-1.1901	-1.29181	-0.257568	-0.370152	0.1312	-0.079	0.063	-0.194	-0.454	-0.085	0.266	0.75	-0.171	11.2928	low
GSM149165	Nakayama	-0.737907	-0.498868	-0.265599	-0.163246	-0.165186	-0.689493	-0.281736	0.366522	0.00603497	0.139061	-0.171081	0.326324	-0.428547	-0.242024	-0.561887	-0.380124	0.0113691	0.0320393	-0.669524	-0.364764	-0.120125	0.753821	0.343775	0.0500372	0.014698	-0.151535	0.245949	0.20646	0.246592	0.253252	0.076634	0.267562	0.348508	-2.4329	0.249059	0.596908	0.413663	-0.158	-0.119	0	-0.093	-0.139	-0.35	-0.201	0.421	8.69634	low
GSM149166	Nakayama	-0.186971	-0.141374	-0.0506641	0.280686	0.116109	-0.122327	0.0294174	-0.393465	0.145913	-0.278653	0.160056	-0.497892	0.808034	0.103501	0.625	0.137643	-0.137635	-0.149365	0.0559681	-0.0542175	0.177436	-0.277656	-0.0460095	0.0299485	0.306976	-0.316658	0.152843	-0.192879	-0.000162846	0.69375	0.618406	0.866082	-0.112201	1.08383	-0.282911	0.432689	-0.410528	0.172	0.338	0.1	0.258	0.026	-0.44	-0.361	0.001	10.8076	low
GSM149167	Nakayama	0.183755	0.392711	-0.232173	0.116772	0.705283	-0.0685684	-0.351036	0.181132	-0.0929515	0.0641764	-0.134965	1.2909	0.194013	-0.303475	0.444866	0.654688	-0.0240219	0.410381	0.427159	1.23919	0.167636	0.55332	-0.402345	-0.41258	-0.11977	0.125268	0.526401	-0.80661	0.53924	0.913809	0.0571148	0.897881	0.824155	6.87334	1.01225	0.975472	0.71987	-0.508	-0.262	-0.289	-0.189	-0.233	0.694	0.943	0.197	11.1081	low
GSM149168	Nakayama	-0.626196	0.0569619	-0.759064	-0.315202	-0.293082	0.0390134	-0.266565	-0.21747	0.0375501	-0.0467444	-0.379338	0.631825	-0.666858	-0.00906921	-0.5714	-0.375478	0.0282259	0.138511	0.0959658	-0.740682	0.000182998	0.196828	-1.0447	-0.0424553	-0.0851659	-0.415341	0.0261143	-1.25049	0.16498	0.09031	0.133951	0.185099	0.166434	7.43792	0.13845	-0.294518	-0.396548	-0.081	0.148	0.223	0.113	0.149	-0.102	-0.197	-0.12	12.8385	high
GSM149169	Nakayama	0.0489152	0.356319	-0.34156	0.146511	0.900861	-0.126476	-0.0944998	0.349344	0.0237295	-0.141003	0.0736009	-0.270802	-1.01074	0.0949425	0.964243	0.484456	0.12898	-0.170468	0.167558	0.312261	0.139027	0.607061	0.313739	-0.296734	-0.126836	0.102259	0.0535862	0.124932	0.812184	0.830429	0.0571148	0.866134	0.889524	-0.56442	0.564033	0.801505	0.829817	0.012	0.201	0.111	-0.165	-0.064	0.274	1.192	0.057	10.8593	low
GSM149170	Nakayama	-1.02241	-0.593859	-0.476164	-0.0642039	-0.936837	0.324806	-0.108842	0.220301	0.150504	0.382902	-0.25627	-0.144206	0.488991	-0.116637	0.1562	-0.454534	0.174981	0.139643	-0.415565	-0.882115	-0.141504	-1.07609	-0.555937	0.0393089	0.316839	-0.374858	0.256588	-0.11588	0.389726	0.0335629	0.101385	0.0249971	-0.841697	-0.877847	-0.790729	-1.20764	-0.712998	0.276	0.096	0.245	0.209	0.19	-0.43	-0.398	0.599	12.4106	high
GSM149171	Nakayama	-0.801925	-0.326453	-0.528302	0.191913	-0.402903	-0.273019	0.0153841	0.00258401	-0.0145483	0.0783808	0.0068206	-0.0120702	0.291822	-0.0812316	-0.280275	-0.518841	-0.159197	-0.26879	-0.020453	-0.273986	-0.191558	-0.409224	1.3923	-0.0150633	-0.144858	-0.162029	0.019649	-0.187595	0.659424	0.413487	0.978092	0.314898	0.378642	-5.56888	0.0494233	-0.307715	0.166927	-0.317	-0.339	0.019	-0.038	-0.159	0.155	-0.947	0.47	13.7984	high
GSM149172	Nakayama	-0.583787	-0.130168	-0.50402	-0.0585928	-0.279272	0.143582	0.0832877	-0.658092	0.144397	0.19252	-0.24611	-0.564113	-1.38645	0.00297317	-0.746334	-0.0447637	0.103061	-0.0342041	0.209153	-0.420414	-0.251617	-0.220729	1.12949	-0.0297767	-0.732342	-0.157897	-0.0513486	-0.824727	-0.236343	0.943143	0.661315	0.735243	0.377908	0.173396	0.134245	-0.114194	-0.0671269	0.451	-0.468	-0.048	-0.111	0.017	0	-0.401	-0.03	13.7419	high
GSM149173	Nakayama	-0.976467	-0.409095	-0.630414	-0.0348956	-0.16618	0.208323	0.0417434	-0.22078	-0.0203187	0.38383	-0.39787	0.195578	1.0673	-0.352463	-0.603993	-0.751744	0.115922	0.262827	-0.283673	-0.977316	-0.102883	0.0433899	-1.50002	-0.251868	-0.0372908	-0.249476	-0.181401	-3.14075	0.574279	0.129505	0.157604	0.102238	-1.30655	-2.30947	-0.527004	-0.477426	-0.128089	-0.11	-0.082	0.067	-0.08	-0.035	-0.725	-0.161	0.718	11.266	low
GSM149174	Nakayama	-0.537889	0.0155949	-0.614983	-0.187135	-0.0407939	0.335828	0.417177	0.186528	0.0381488	0.282932	0.303899	-0.0677887	-0.208089	-0.123346	0.5393	-0.0132941	-0.140351	-0.710398	-0.0717683	0.41058	0.269054	-0.0613745	-0.639901	-0.04499	0.158109	-0.0170661	0.082982	-0.454828	0.791483	0.833641	0.157319	0.249655	0.0691701	1.58766	-0.57555	0.155075	0.35822	0.048	0.408	0.021	0.109	0.106	0.703	1.125	-0.269	11.0268	low
GSM149175	Nakayama	-0.912246	-0.313875	-0.664857	-0.115382	-0.607601	-0.249832	0.170948	-0.536948	-0.125393	0.113786	0.0796626	-0.944213	-0.761562	0.129116	0.249256	-0.548397	-0.037263	-0.607687	-0.366134	-0.405821	-0.178205	-1.1026	-1.68365	0.0160146	-0.38909	0.154618	-0.343618	-0.153625	-0.443129	0.301092	0.887548	0.744251	-1.13627	0.59005	-0.688542	-0.521078	-0.302554	0.383	-0.087	0.029	0.143	0.153	-0.033	-0.217	-0.261	11.1617	low
GSM149176	Nakayama	-0.0921954	-0.157344	0.0723878	0.0176777	0.363507	0.135711	0.192407	0.205942	0.159832	-0.199204	-0.0511909	0.429045	0.950865	-0.00555847	-0.00662412	0.0218742	0.0352771	0.245469	0.0304302	0.328987	0.1146	0.373083	0.446852	-0.0269349	0.570746	0.381437	0.463901	0.577869	0.546138	0.414995	0.563273	0.466006	0.0511253	-1.08191	0.115055	0.354531	0.478704	0.122	0.105	0.115	0.322	0.177	0.366	-0.108	0.385	11.7723	high
GSM149177	Nakayama	-0.380491	-0.135164	-0.272585	-0.000354222	0.206181	-0.223631	0.135685	0.222857	0.0205955	-0.380315	-0.257636	0.679571	-0.216628	0.0194413	0.0914303	0.452004	-0.0345671	-0.12022	0.0987328	0.0748484	-0.0948134	0.194098	1.07897	-0.100766	0.0961801	0.201406	-0.0244087	0.598251	0.621549	0.860577	0.843777	0.614731	0.306614	-1.01385	0.0667746	0.181151	0.374634	-0.071	0.001	-0.093	-0.091	-0.147	0.688	0.193	0.188	10.1463	low
GSM149178	Nakayama	-0.21839	-0.123168	-0.105803	0.0354203	0.144182	-0.230987	0.0813843	0.0646391	0.170699	-0.0760949	0.0423751	0.86916	-1.31426	0.151563	0.0818177	0.0615331	0.359404	-0.166744	0.672813	-0.403271	0.029001	-0.468214	1.09262	-0.0242469	0.0636341	0.316002	-0.0769763	-0.0283122	-0.200409	0.634796	0.984714	0.93246	0.199212	-0.603199	-0.0687108	-0.0794134	-0.0780779	-0.221	-0.247	0.051	0.229	0.055	0.287	-0.293	0.471	13.3055	high
GSM149179	Nakayama	0.0482658	-0.137887	0.206836	0.0576666	0.497658	-0.0470465	0.0190357	0.0454842	0.0969695	0.0165575	-0.0671667	0.336316	0.952418	-0.151524	0.779606	0.666532	0.000616485	0.182926	-0.131199	0.214831	0.517122	0.64885	1.1015	-0.00137222	0.919766	0.197159	0.659046	1.01873	0.0198623	0.555348	0.571181	0.623628	0.95377	-2.32618	0.332488	0.680401	0.914467	0.164	0.165	0.075	0.281	0.071	0.307	0.009	0.972	12.9217	high
GSM149180	Nakayama	0.121441	0.118717	0.00302707	0.0366122	-0.0120894	-0.0381615	0.318922	0.122786	0.187511	0.0813684	0.0546611	0.204878	-2.32728	-0.0489313	0.30783	0.0334574	0.103842	-0.264589	-0.14535	0.240734	0.0787598	0.880074	-0.435794	-0.169328	0.232485	-0.174413	0.112012	-0.454073	-0.0999543	0.509103	0.759605	0.145838	0.382949	3.87732	0.357908	0.837333	0.868736	0.046	0.068	-0.038	-0.133	-0.029	0.262	0.223	0.334	11.9723	high
GSM149181	Nakayama	-0.256196	0.0397048	-0.328779	0.0213964	0.18302	-0.19385	-0.0325483	-0.374168	0.508645	0.209975	0.131127	0.512789	1.30018	-0.269761	-0.522074	-0.0656882	-0.139809	0.0650978	-0.254318	-0.203914	-0.0275441	-0.00246311	-1.15461	-0.216993	0.286233	-0.0522	0.0886334	-0.429162	-0.113481	0.544111	0.530004	0.130302	0.806869	1.94831	0.482298	0.68128	0.662165	0.003	0.168	0.037	0.08	-0.013	-0.079	-0.146	0.366	12.959	high
GSM149182	Nakayama	0.246266	0.607052	-0.400874	0.742532	0.994761	0.11183	0.346811	-0.0703999	0.35852	0.215861	0.00154969	-0.217174	1.12552	-0.16859	0.829654	0.431147	-0.221647	0.131695	-0.065229	0.162268	0.00836188	0.71312	0.641403	-0.381585	0.511186	0.0631466	0.422709	0.0532165	0.880769	0.741536	0.557517	0.350485	1.61567	3.64372	1.32082	1.62647	1.43566	-0.141	-0.078	-0.03	-0.103	-0.08	0.24	-0.088	0.511	11.1636	low
GSM149183	Nakayama	-0.265941	0.146788	-0.458588	-0.137324	0.501808	0.173454	-0.282324	-0.103057	0.311429	0.378718	0.0268725	0.590361	-0.530236	0.102997	0.744292	0.41922	-0.0954167	0.0841273	-0.0706149	0.0685597	0.245544	0.447143	-1.09795	-0.138352	0.49825	-0.219479	0.442225	-0.651856	-0.0899564	0.282353	0.115191	0.28641	1.10128	2.73478	0.905653	1.08761	1.07495	-0.063	-0.24	0.14	0.156	0.236	0.078	-0.633	-0.268	9.42944	low
GSM149184	Nakayama	0.224742	0.115534	0.121342	0.0926531	0.375004	-1.06082	-0.604375	-0.549678	0.015257	0.0483582	-0.272251	0.835877	-1.21412	-0.112723	-0.585968	0.0740869	-0.0469178	0.720484	-0.331222	1.14408	0.614112	-0.0649782	-0.383231	-0.0330287	0.572888	0.0941676	0.0672314	-1.03987	0.164555	0.757895	0.0571148	0.472244	-0.0614433	-0.937717	-0.0897711	0.510508	0.400287	-0.453	-0.329	-0.12	-0.115	-0.39	0.186	-0.145	0.464	11.8259	high
GSM149185	Nakayama	-0.500176	-0.356989	-0.159097	-0.395991	-0.270922	0.0418649	-0.173166	0.193153	-0.183122	0.430614	0.00196188	1.59065	0.332963	-0.0656045	-1.04515	-0.295586	0.0719057	0.436091	0.22057	-0.0476437	0.370883	-0.709049	-0.806464	-0.298949	0.131973	0.11067	-0.000566858	0.150598	0.118617	0.252453	0.280431	0.385159	-0.458349	2.05306	-0.268318	-0.713332	-0.68219	-0.056	-0.175	0.158	0.309	0.168	-0.379	-0.27	0.054	11.3091	low
GSM149186	Nakayama	-0.638118	-0.38843	-0.277431	-0.0821261	0.143276	-0.180456	-0.138392	0.0150694	-0.259228	0.177314	-0.0847224	0.724417	-2.01988	0.0302863	-0.53013	0.339138	-0.132979	0.0396948	-0.480944	-0.158772	0.478935	0.491144	-1.15051	-0.356536	0.623059	0.161932	0.152985	0.292518	1.01042	0.594721	0.623681	0.740674	0.279355	1.17054	0.0650498	0.453376	0.443529	-0.063	0.057	0.037	-0.092	-0.049	0.507	-0.157	0.304	11.6029	low
GSM149187	Nakayama	0.0410587	0.530941	-0.544314	0.0864799	0.698002	0.308062	-0.481445	0.114891	0.227163	0.585059	0.0204447	0.222707	0.0550626	-0.0294068	0.658618	0.528574	0.151402	0.343028	0.210516	0.385791	0.135342	1.01555	-1.14437	-0.0291777	0.0306787	-0.0877052	-0.124494	-0.891158	1.0792	0.651168	0.164146	0.499914	1.29481	5.48102	1.00308	1.44062	1.29755	-0.025	-0.044	-0.037	-0.093	0.107	0.491	0.311	0.11	8.87436	low
GSM149188	Nakayama	-0.444254	-0.0156521	-0.476225	0.130745	0.546538	0.606445	-0.0694929	0.271809	0.319744	0.273271	-0.127827	0.501675	0.704791	-0.293195	-0.996796	0.669607	-0.293535	0.0280712	-0.117458	-0.0835777	0.209891	0.306113	1.0858	-0.333063	-0.0348399	-0.300108	0.271385	0.0879417	1.08797	0.0455796	0.0571148	0.0537874	0.882872	6.95088	0.774232	0.75458	0.920182	-0.114	-0.18	0.16	0.021	0.396	0.12	-0.701	-0.19	10.82	low
GSM149189	Nakayama	-0.521978	-0.0401883	-0.535322	-0.0421816	-0.155653	0.179507	-0.0586688	-0.206997	0.350919	0.0819965	-0.0454993	-0.420657	0.893422	0.411357	-0.644706	-0.0517679	-0.204653	-0.421656	0.255022	-0.265939	0.110656	-0.130685	-0.412584	0.066748	0.011039	-0.0754725	-0.14571	-0.739424	-0.241387	0.441433	0.821453	0.581303	-0.168738	3.23057	-0.277651	-0.2791	-0.699662	-0.108	0.156	0.206	0.238	0.068	0.349	-0.739	-0.073	13.6251	high
GSM149190	Nakayama	-0.0996179	0.246866	-0.384982	0.0378665	0.457024	0.195213	0.104243	0.0713497	-0.132182	-0.0838078	-0.0833062	-0.247153	0.026341	0.0735816	0.967515	0.53713	0.107178	0.05648	0.127194	1.22105	0.32006	0.462636	0.913774	0.0292643	0.193197	0.443992	0.20182	0.972679	-0.161814	0.639164	0.388717	0.496756	0.732773	-0.108315	0.266529	0.552261	0.438959	0.15	0.333	0.126	0.173	0.096	0.207	0.463	0.063	9.79886	low
GSM149191	Nakayama	-1.08607	-0.698387	-0.430764	-0.262858	-0.441021	0.523784	-0.0885475	-0.275392	-0.184458	0.353787	0.076606	-0.442345	1.21712	0.335004	-0.896534	-0.999614	0.104092	-0.0904155	-0.271712	-0.696316	-0.188304	-1.04753	0.512385	0.163078	-0.0676172	-0.356321	-0.162731	-0.950795	0.488868	0.0381643	0.0571148	0.0907997	-0.898833	-2.31302	-0.403771	-0.52765	-0.260851	0.39	0.483	0.331	0.326	0.513	-0.155	0.653	0.583	11.3215	low
GSM149192	Nakayama	-0.354209	-0.21592	-0.153654	0.00590227	-0.279033	-0.314115	-0.0925995	0.203329	-0.104643	0.124742	-0.442228	-0.0655737	1.21712	0.197696	0.58481	-0.14384	-0.114663	0.337091	-0.0306276	-0.293704	0.08058	0.0856241	0.580649	-0.108334	0.267234	-0.0081183	0.355425	-0.604298	0.0221028	0.723256	0.483543	0.247156	0.179851	-1.15104	0.139653	0.0422791	-0.105212	-0.025	0.085	0.177	0.23	0.263	0.109	0.307	-0.485	10.5033	low
GSM149193	Nakayama	-0.138768	0.169757	-0.342806	-0.212572	0.51241	0.343833	0.180362	0.25813	0.352494	0.158586	-0.182598	0.423867	0.188579	0.269545	0.270246	0.859728	-0.0939748	-0.00126969	0.0926145	-0.204795	0.0309441	0.152428	0.872133	-0.10102	0.416452	-0.399707	0.234499	-0.489553	-0.807561	0.379501	0.996278	0.356428	1.54772	3.77429	1.30851	1.46891	1.22464	0.082	-0.001	0.165	0.341	0.254	0.225	-1.029	0.348	11.6737	high
GSM149194	Nakayama	-0.561104	-0.10065	-0.511615	-0.358575	-0.0199416	0.00246706	0.165705	0.122024	0.180539	0.0561512	-0.0400843	-0.663347	-0.651333	0.265583	-0.125022	-0.0456671	-0.0491574	-0.321557	-0.196954	0.261127	-0.00235912	0.60244	0.0993915	0.083805	0.430761	-0.319679	0.109918	-0.789247	0.514996	0.594942	0.320403	0.204698	0.0683566	-0.279806	-0.476895	0.213215	0.373474	0.196	0.516	0.158	0.275	0.295	0.189	1.087	0.612	10.9454	low
GSM149195	Nakayama	-0.839788	-0.411578	-0.475789	0.0512024	-0.289931	-0.117436	-0.273992	0.306064	0.039107	0.660263	0.236213	0.427757	1.27301	-0.00735191	0.180755	-0.56344	-0.050285	-0.146378	-0.0299088	-0.754695	-0.142691	-0.175415	0.553343	-0.140529	0.0764832	-0.149375	-0.202038	-3.16717	-0.275208	0.105809	0.853074	0.0513075	-0.416345	-5.89833	-0.495941	-0.818366	-0.643864	-0.199	-0.229	-0.102	-0.127	-0.09	0.177	-0.467	-0.282	11.1828	low
GSM149197	Nakayama	0.160181	0.0350287	0.139058	0.0458396	0.604077	-0.0266266	0.234066	0.137617	-0.105904	-0.384323	-0.196347	0.62988	0.142004	0.323768	-0.281119	1.18787	-0.000428753	0.628447	0.203177	0.383708	0.1639	0.652294	-1.31366	0.0513627	0.283266	-0.114555	0.562681	-1.08517	0.463331	0.688148	0.581268	0.433865	1.11744	5.74122	0.906372	1.03104	1.08018	-0.121	0.02	0.218	0.281	0.229	0.671	0.41	-0.11	7.7192	low
GSM149198	Nakayama	-0.572549	-0.0890148	-0.53726	0.234798	-0.158656	-0.394087	0.0532444	-0.281319	0.0636692	-0.29136	-0.271657	0.778526	0.603878	-0.07078	0.42693	0.104228	0.179175	-0.102193	0.652379	-0.608932	-0.189751	-0.551506	1.25168	-0.0164636	-0.217288	0.101064	-0.246939	0.545408	-0.46301	0.960366	0.461362	0.723542	0.205955	-1.30284	0.1415	-0.556061	-0.128801	-0.13	-0.375	-0.306	-0.398	-0.063	0.179	0.086	-0.726	11.3904	low
GSM149199	Nakayama	0.0917759	0.379352	-0.319529	0.290713	0.784026	-0.142475	0.221324	0.333372	0.161804	0.335321	-0.0278831	0.628268	1.09137	-0.0108961	1.07428	0.556425	0.203216	0.27765	0.065102	-0.00838076	0.258426	0.651961	-1.48637	-0.0565497	0.0380508	0.270544	0.176869	0.737152	0.934272	0.597829	0.0639858	0.644567	1.52061	4.99227	1.22524	1.29179	1.13378	0.023	0.211	0.023	0.029	0.001	0.311	0.523	0.026	10.3147	low
GSM149200	Nakayama	-0.888627	0.0082629	-0.996544	-0.0306581	-0.124666	0.940287	0.14616	0.062993	0.0251651	0.680501	0.0804211	0.432321	1.1884	-0.0572771	-0.375837	-0.285388	0.212624	0.314309	-0.114968	-0.532847	-0.197686	-1.0208	-1.12389	-0.289543	-0.152398	-0.597162	-0.236345	-0.364996	0.730261	0.0945486	0.261023	0.028694	-0.0928423	2.28239	-0.163058	-0.171814	-0.328728	0.271	0.149	0.29	0.312	0.331	-0.047	-0.509	0.196	12.7829	high
GSM149201	Nakayama	-0.0427358	0.256915	-0.332946	0.106784	0.726217	0.235204	0.0283437	0.31577	0.132199	0.105967	0.100751	0.535059	0.788627	-0.0484755	0.604468	0.721039	0.242633	0.372852	-0.172762	-0.414294	0.0132275	0.418471	1.17044	0.0132059	0.31191	0.186875	0.396304	0.67978	0.349172	0.265642	0.379527	0.0610783	1.4966	5.82659	0.832312	0.864813	0.462416	0.1	-0.089	0.093	0.253	0.201	0.387	-0.392	0	10.0477	low
GSM149202	Nakayama	-0.74206	-0.295859	-0.495779	-0.0983407	9.88281e-07	0.066782	0.00281014	0.238014	0.134713	0.304859	-0.0296325	-0.999792	-1.08681	-0.0214555	0.459826	-0.0104574	-0.000689259	-0.0209119	0.0217287	-0.49355	-0.0264866	-0.123434	-0.0603449	-0.157058	0.321322	-0.0754079	0.221963	0.106059	0.558119	0.376136	0.687812	0.287176	-0.171875	-0.00449868	-0.153879	-0.17383	-0.0454247	0.267	0.138	0.192	0.278	0.221	0.082	0.116	0.948	12.7102	high
GSM149203	Nakayama	-0.670384	-0.177076	-0.54812	-0.310472	-0.373422	-0.168691	-0.373171	0.237615	-0.549283	0.183017	-0.548483	1.40014	-1.71403	-0.164827	-0.652222	-0.701956	0.0747255	0.377854	0.106014	-0.0138257	-0.162634	-0.628645	-1.31776	-0.362595	-0.516771	-0.374082	-0.0581978	-0.963628	-0.292725	0.261079	0.0571148	0.016271	0.327783	-3.36932	-0.324682	-0.0220017	-0.711003	-0.327	-0.159	-0.055	-0.108	0.204	-0.269	-0.017	-0.679	11.7914	high
GSM437554	Beck	-0.162131	0.0203232	-0.283906	0.359954	0.0799138	0.774443	0.324816	0.374757	-0.172196	0.440172	0.278028	0.215829	NA	0.0807051	0.146751	0.388269	0.214798	0.553993	0.137886	-0.210462	-0.0907505	0.529333	NA	0.265846	0.453942	0.113835	0.241481	NA	0.601602	0.896193	0.88423	0.706853	-0.270015	-0.753613	0.107791	0.610704	-0.0126929	0.13	0	0.127	-0.011	0.14	-0.405	0.223	0.555	10.5099	low
GSM437555	Beck	-0.27536	-0.135449	-0.275427	0.0189504	0.180953	0.440467	0.126112	0.344884	-0.0527358	0.38064	0.390117	0.176242	NA	0.266795	0.298417	0.538602	0.0235002	0.590898	0.0965494	0.267609	0.0393968	0.0486463	NA	0.403592	0.336552	0.413857	-0.0663582	NA	-0.122208	0.660636	0.208784	0.33074	0.159695	1.50871	0.461648	0.347848	0.208209	0.226	0.163	0.159	0.17	0.193	0.008	0.024	0.107	12.1407	high
GSM437561	Beck	-0.385424	-0.0740842	-0.458294	0.237953	0.253511	0.289028	0.255551	0.048241	0.21122	0.305008	0.173772	0.737976	NA	0.172062	-0.3043	0.409079	0.153969	0.724822	0.234166	0.128285	0.0103998	0.336089	NA	0.132811	0.46373	0.608999	0.146445	-0.935643	0.602681	0.751221	0.553648	0.161911	-0.398946	2.94297	0.296647	0.0905375	0.292248	0.162	0.214	0.184	0.279	0.158	0.31	0.322	0.311	11.61	low
GSM437568	Beck	-0.117697	-0.249445	-0.0777587	0.126036	-0.057034	0.321622	-0.05723	-0.400386	-0.585684	-0.115682	0.051398	0.81554	NA	0.106222	0.810516	0.191537	0.152923	-0.24457	-0.0812581	0.0283257	0.103061	0.247769	NA	0.0275408	0.0644148	-0.0343095	0.120506	NA	0.338489	0.686415	0.164432	0.847344	0.408132	-0.445346	-0.131906	0.388744	0.563931	-0.014	-0.013	0.012	-0.015	-0.029	-0.426	-0.142	0.1	12.1909	high
GSM437569	Beck	-0.0964897	-0.333379	0.153391	0.122149	-0.258774	0.184693	0.16919	0.172718	-0.116202	0.245082	0.166085	1.16511	NA	0.217584	1.09204	0.391683	0.232012	0.703103	0.146279	0.291895	0.0559668	-0.0255109	NA	0.472051	0.347314	0.34263	0.157738	-1.08929	-0.112927	0.97604	0.275605	0.0615955	0.0496716	-0.633406	0.350169	0.451514	0.131782	0.197	0.121	0.133	0.078	0.101	0.026	0.113	0.189	11.2338	low
GSM437572	Beck	-0.245837	-0.0939635	-0.259043	0.608137	0.073594	0.4267	0.327699	0.361709	0.203609	0.38215	0.166576	0.652069	NA	0.283049	0.875738	0.477431	0.151561	0.127192	0.0598825	0.0595448	0.116281	0.212939	NA	0.345241	0.539073	0.338477	0.224623	NA	1.08371	0.60618	0.646645	0.274408	-0.488361	-0.954035	0.330261	0.399746	-0.107951	0.153	0.24	0.252	0.248	0.284	-0.041	0.103	0.15	12.1111	high
GSM437582	Beck	-0.250804	-0.234648	-0.0721463	0.281208	-0.151446	0.125515	-0.0281145	0.249849	-0.20597	-0.148319	0.0472783	-0.141036	NA	-0.128808	0.578525	0.345126	0.246178	0.226026	0.142628	0.00997426	0.0339317	-0.398246	NA	0.17163	0.0828733	-0.248029	0.0499649	0.552154	0.601724	0.641459	0.439044	0.069983	-0.630934	-1.67763	0.281571	0.344422	0.36049	0.016	-0.078	0.018	-0.08	0.071	-0.057	0.2	0.323	10.7675	low
GSM437583	Beck	-0.429989	-0.169884	-0.269619	0.16117	-0.0348411	0.424134	-0.113268	0.168053	-0.0753768	0.0287065	0.0196593	0.667001	NA	0.232266	0.916054	0.405912	0.19596	0.12413	-0.102023	0.288244	-0.00726635	-0.0910106	NA	0.380023	0.26796	0.0155151	0.210165	-2.36464	-0.197793	0.89082	0.853396	0.44354	0.103001	0.76004	0.232021	0.141983	0.25349	0.008	0.112	0.022	0.15	0.011	0.035	-0.144	0.264	11.9926	high
GSM437585	Beck	-0.494785	-0.171663	-0.434246	0.0575182	0.0253711	0.393486	0.124634	-0.0782115	-0.254998	0.125645	0.0545883	0.469176	NA	0.188894	0.743629	0.316986	0.225488	0.042804	-0.303389	0.000462784	0.12688	-0.18049	NA	0.439117	0.365051	0.179976	-0.0140455	-1.25748	-0.532255	0.907296	0.515248	0.0914449	0.185431	-2.59957	0.431591	0.602187	0.440151	-0.005	0.137	-0.006	0.057	0.053	-0.002	-0.121	0.229	12.142	high
GSM437589	Beck	-0.276965	-0.291244	-0.097129	-0.441162	-0.68312	-0.733625	-0.383731	-0.998296	-0.54291	-0.158741	-0.62854	-0.947903	NA	-0.315001	-1.20671	-0.389734	-0.246673	-1.09993	0.426819	0.226425	-0.574946	0.434668	NA	-0.595001	-0.236901	-0.496062	-0.0517843	NA	-0.26445	0.394523	0.577772	0.212416	0.214002	-2.61802	-0.330992	-0.315902	-0.135726	-0.277	-0.348	-0.285	-0.399	-0.374	-0.216	0.004	-0.289	12.826	high
GSM437592	Beck	-0.355725	-0.231283	-0.269572	0.354754	0.566666	0.24771	0.0324596	0.160626	0.277191	0.324663	0.306876	0.64574	NA	0.287385	0.977446	0.577061	0.208947	-0.439941	0.212955	0.48779	0.245419	0.429252	NA	0.31083	0.290575	0.197142	0.173278	0.137999	0.180491	0.613246	0.52523	0.557983	0.436187	2.82972	0.433277	0.0772393	-0.0681617	0.234	0.332	0.248	0.202	0.204	0.406	0.21	0.606	13.045	high
GSM437599	Beck	-0.421415	-0.226521	-0.328444	-0.37657	-0.813175	-0.933136	-0.454238	-1.24855	-0.45482	-0.257094	-1.10209	-0.906748	NA	-0.376415	-1.22651	-0.554469	0.0960904	-1.10093	-0.0834695	-1.08558	-0.485614	0.197308	NA	-0.561003	-0.584112	-0.138822	-0.180806	NA	-0.13317	0.365794	0.908465	0.116293	0.304062	-5.81292	-0.356266	-0.304932	-0.166143	-0.261	-0.36	-0.324	-0.319	-0.418	0.17	-0.295	-0.419	13.0359	high
GSM437606	Beck	-0.155237	-0.0496389	-0.189862	-0.453695	-0.406113	-0.789945	-0.680363	-0.78575	-0.397262	-0.382857	-0.394483	-0.503102	NA	-0.189241	-0.613904	0.0558165	-0.0041253	-1.47753	0.466333	-0.643046	-0.125	0.81643	NA	-0.280641	-0.380349	-0.376698	-0.134859	NA	-0.276266	0.630869	0.617352	0.0633454	0.0720477	-3.04027	-0.418236	0.0682474	-0.48714	-0.07	-0.188	-0.232	-0.197	-0.113	-0.122	-0.006	0.125	13.2343	high
GSM437609	Beck	-0.395668	-0.0226219	-0.557592	0.192513	0.0777235	0.212893	0.0804124	-0.00140318	0.162375	0.355177	0.169874	0.484357	NA	0.45444	0.261989	0.380968	0.255336	0.460498	0.27195	0.342528	-0.0364657	0.297004	NA	0.442288	0.419854	0.537219	0.256394	-0.125037	-0.152197	0.843486	0.397231	0.606164	0.119887	1.22618	0.297289	0.273994	0.124264	0.213	0.262	0.188	0.289	0.162	0.417	0.381	0.049	12.7706	high
GSM437611	Beck	-0.202532	0.103544	-0.461813	0.230401	0.313187	0.315283	0.520746	0.151493	0.297245	0.185169	0.172037	0.718675	NA	0.312954	0.554046	0.571474	0.0746647	1.14673	0.314172	0.341567	0.0859275	0.51435	NA	0.561498	0.408447	0.266741	0.211525	-1.29605	0.280393	0.891603	0.794066	0.209685	-0.0760619	1.6722	0.511278	0.533892	0.41599	0.195	0.195	0.151	0.194	0.171	0.442	0.101	0.058	12.4563	high
GSM437616	Beck	-0.307388	-0.300456	-0.200677	-0.216865	0.20664	0.713204	0.170462	-0.0942827	-0.0241733	-0.20782	0.0991943	-0.0683981	NA	0.409579	0.435865	0.404377	0.329352	0.385367	0.582298	0.139157	0.113556	-0.148165	NA	0.104239	0.32614	-0.183504	0.176789	0.0823568	0.266427	0.825357	0.572969	0.302365	0.0846811	2.86808	0.604796	0.284146	0.300727	0.168	0.156	0.106	0.206	0.189	-0.215	0.428	0.817	13.6916	high
GSM437623	Beck	-0.452371	-0.101532	-0.502393	0.318139	0.473236	0.535331	-0.0744571	0.146291	-0.00569668	0.56441	0.0096413	1.16885	NA	0.184358	0.595412	0.580969	-0.119541	0.49092	0.593973	-0.0995753	0.073528	0.0325625	NA	0.485142	0.604527	0.327012	0.0900389	-0.656167	0.302891	0.823064	0.38016	0.110128	0.712538	-0.985773	0.284568	0.277886	0.200245	0.234	0.132	0.212	0.18	0.2	-0.059	0.302	0.252	13.3142	high
GSM437626	Beck	-0.278762	-0.107216	-0.385859	0.358726	0.191756	0.222993	0.221013	0.519133	0.0967397	-0.0248209	0.28794	0.594848	NA	0.157257	0.35334	0.352378	0.120177	0.0803239	0.330187	0.910717	0.194759	-0.214459	NA	0.277975	0.472439	0.215867	0.0597638	-1.18603	-0.231293	0.662336	0.829667	0.333636	0.757567	-0.982046	0.471319	0.407415	0.0918238	0.138	0.193	0.176	0.047	0.131	0.014	0.193	0.396	13.6723	high
GSM437627	Beck	-0.472685	0.00195543	-0.640577	-0.46058	-0.00675203	-0.318722	0.111105	-0.243029	0.18739	0.0496487	-0.450431	-0.591023	NA	-0.280957	-0.421822	-0.54952	-0.1162	-0.222602	0.195777	-0.698059	-0.259784	-0.778853	NA	-0.192475	-0.0550177	0.238128	-0.279026	0.707699	-0.834326	0.424537	0.112747	0.0708893	-0.413153	4.81517	-0.106748	0.39756	-0.179871	0.152	0.016	-0.002	-0.16	0.023	0.567	0.524	-0.048	13.8513	high
GSM437556	Beck	-0.828073	-0.157011	-0.403033	-0.356485	-0.136985	-0.559831	-0.456708	0.343463	-0.148311	-0.505612	-0.205761	-1.57405	NA	-0.286142	0.721281	0.13426	-0.824881	0.218926	-0.246565	-0.260117	0.177193	-0.814795	NA	-0.487319	0.0818779	-1.10979	-0.541366	-0.447509	0.0633505	0.0247378	0.779502	0.0654146	-0.764834	-2.01775	-0.454985	-0.404036	0.240207	-0.353	-0.233	-0.256	-0.274	-0.319	-0.396	-0.323	-0.703	8.75676	low
GSM437613	Beck	-0.221162	-0.189716	-0.22547	-0.24426	-0.46224	-0.140866	0.203507	0.113228	0.0367164	-0.341698	-0.0935019	-0.371318	NA	-0.0187145	0.19887	-0.815758	-0.169694	0.2063	-0.295034	-0.181162	-0.103968	-0.881045	NA	-0.331683	-0.705839	-0.217036	0.0922816	1.00425	0.216666	0.0527055	0.035547	0.835462	-0.418169	-1.09518	-0.580361	-0.397431	-0.636209	-0.219	-0.127	-0.197	-0.243	-0.212	-0.408	-0.651	-0.535	11.5662	low
GSM1264517	Renner	-0.130861	0.187482	-0.318468	0.0314304	0.825087	0.0810968	0.0724826	0.143866	0.184486	0.266874	-0.0499151	-0.0908517	0.403871	0.00402683	0.864764	0.512732	-0.0254231	-0.122143	-0.26031	0.789955	0.162869	0.792938	-0.102533	-0.0091417	0.265887	0.174759	0.213237	-0.218453	0.606267	0.501198	0.545052	0.0618904	1.33001	5.88722	1.00188	1.37092	0.709358	0.022	0.378	0.106	0.003	-0.008	-0.093	1.065	0.146	10.0186	low
GSM1264516	Renner	0.154397	0.0201186	0.177156	0.289451	0.44698	-0.465968	-0.27362	-0.614755	-0.205143	-0.223152	0.0137915	0.0722392	1.03725	-0.26691	0.338681	0.421705	-0.370437	0.1198	-0.0409782	0.728845	0.343517	0.204394	-0.0807272	-0.164721	0.463972	0.337859	0.43044	0.648915	0.452108	0.663344	0.159046	0.232736	1.05588	-3.1517	0.349802	0.39251	0.573927	-0.158	0.189	-0.148	-0.093	-0.018	0.385	0.875	0.293	9.75972	low
GSM1264515	Renner	0.0183799	-0.459293	0.480423	-0.170093	-0.00125838	0.0180592	-0.102562	-0.184074	0.43935	0.139705	-0.254683	0.421999	1.10676	-0.148295	-0.15442	-0.217711	-0.186492	-0.205322	0.406795	1.57507	0.288223	-0.341055	0.255079	-0.0643619	0.973598	-0.115877	0.582373	-0.256773	-0.04621	0.557009	0.449467	0.486628	0.103744	1.28561	0.20867	0.273153	0.894742	-0.124	-0.145	0.003	0.076	0.02	-0.073	-0.268	0.048	9.97355	low
GSM1264514	Renner	-0.855443	-0.569151	-0.340178	-0.424031	-0.315123	0.191392	0.04544	-0.269692	-0.315171	0.493372	-0.316545	0.0180633	-0.762467	-0.000298119	-0.116918	-0.333146	-0.0229804	-0.296276	-0.464986	-0.277474	-0.349199	-0.432514	-0.242089	-0.0600415	-0.0975372	-0.0558471	-0.16712	-0.270038	0.758117	0.381434	0.118772	0.11875	-0.913353	0.173321	-0.605843	-0.810317	-0.291345	0.058	0.235	0.094	0.063	0.104	-0.183	0.406	-0.532	8.45355	low
GSM1264513	Renner	-0.469361	-0.510003	0.0164634	-0.0109859	-0.048948	-0.260144	-0.390756	0.0692478	-0.145142	0.0367698	0.0938024	0.0541212	0.28801	-0.201655	-0.577198	-0.190904	-0.131008	-0.0519744	-0.488588	0.0800586	-0.114638	-0.108862	-0.961675	-0.197146	0.599676	-0.102954	0.0169836	0.951793	0.0872425	0.378241	0.456867	0.398071	-0.275445	-1.31039	-0.247272	-0.219837	-0.0534927	0.02	0.189	-0.009	0.026	-0.078	-0.198	-0.061	0.985	11.8053	high
GSM1264512	Renner	0.868132	0.392311	0.521049	0.722636	1.57217	0.294872	0.0126693	0.278083	0.30003	0.169099	0.39976	1.19249	0.125804	0.274516	-0.199832	1.08708	-0.194547	0.661856	0.712697	0.568578	0.22289	2.11325	-0.0850883	0.0096436	0.741922	-0.460792	0.475772	0.100638	0.0748392	0.733827	0.185873	0.592446	2.36105	6.9545	1.49253	1.81003	0.914933	-0.105	-0.182	0.042	0.101	0.063	0.274	-0.281	-0.624	9.43769	low
GSM1264511	Renner	0.161829	-0.0321988	0.238258	-0.177737	0.278069	-0.279134	-0.316553	-0.48425	0.063264	-0.364705	-0.18508	-0.383885	-0.283573	-0.391203	-0.0568467	0.231194	-0.193818	0.0754274	-0.00485242	0.0532271	0.532239	0.649326	-0.333673	2.67727e-05	0.48152	-0.0295992	0.158402	0.315085	0.616681	0.686448	0.194967	0.489319	0.481691	-1.83548	0.132156	0.182056	0.61312	-0.074	0	-0.035	0.102	-0.034	0.386	0.189	0.634	12.0165	high
GSM1264510	Renner	-0.664151	-0.482865	-0.20558	-0.48365	-0.187508	-0.0187073	0.226023	-0.122488	0.0473001	-0.130955	-0.250749	-0.320562	-0.0132296	-0.150233	-0.0879149	-0.836026	-0.354907	-0.0713324	-0.30508	-0.482561	-0.374846	-0.730828	-1.17973	-0.0546967	0.0521404	-0.143297	-0.0645386	1.5745	-0.377059	0.446108	0.208702	0.163373	-0.671588	-8.09139	-0.366614	-0.542234	-0.465629	-0.03	0.282	-0.054	-0.124	-0.178	-0.285	0.634	0.37	11.567	low
GSM1264509	Renner	-0.0639925	-0.58048	0.506143	-0.137704	-0.313229	-0.502034	-0.111384	0.0502855	-0.0626147	0.211191	-0.0327749	-0.386329	1.16856	-0.331564	-0.310271	-0.307815	-0.372825	-0.137029	-0.307847	0.217596	0.387753	-0.429136	1.53725	-0.0385359	0.642174	-0.0355204	1.17418	0.750611	0.691053	0.377154	0.714889	0.306624	-0.345122	1.98292	-0.092109	0.160295	0.0654691	-0.011	-0.103	0.147	0.221	-0.012	0.095	0.319	0.082	10.6679	low
GSM1264508	Renner	0.616165	0.299947	0.370668	0.489575	1.64469	0.368746	-0.0375762	0.345829	0.499379	0.344746	0.576539	0.596763	-2.88659	0.0386184	0.831021	0.711389	-0.18346	0.302267	-0.0120023	0.50908	-0.0140385	1.42217	1.26686	0.0137405	0.608715	-0.215745	0.556835	0.365196	1.00199	0.75834	0.326475	0.680177	2.45465	9.00943	1.71872	2.23384	1.36452	-0.113	0.009	0.059	0.104	0.034	0.339	0.373	0.111	9.24447	low
GSM1264507	Renner	-0.356858	-0.386326	-0.00824338	-0.294091	-0.520857	-0.00856895	-0.307528	-0.171078	-0.196653	0.111028	-0.288494	-0.215824	-1.5735	-0.521286	0.147323	-0.440213	-0.289476	-0.433848	-0.402782	-0.461697	0.268296	-0.106152	-0.2072	0.014007	-0.0795509	-0.00363283	-0.0960588	0.410149	0.322234	0.726012	0.925949	0.128432	-0.834806	-0.844687	-0.432054	-0.693481	-0.0702428	-0.11	-0.106	-0.227	-0.04	0.071	-0.21	0.171	-0.504	11.2771	low
GSM1264506	Renner	-0.687392	-0.413391	-0.294244	-0.103826	-0.373424	0.406294	-0.0299653	-0.106131	0.0411742	0.10846	0.106619	0.280002	-1.98287	-0.0850754	-0.100092	-0.368262	-0.0454714	0.0178934	0.157431	-0.445328	0.0776724	-0.512465	0.538553	-0.0957911	0.107508	-0.231704	-0.156795	0.250235	1.57389	0.604444	0.118772	0.475068	-0.628241	-3.20326	-0.538093	-0.549079	-0.312255	0.058	0.303	0.079	-0.012	0.079	0.038	0.939	0.274	9.61159	low
GSM1264505	Renner	0.235775	0.0804626	0.176294	0.254547	0.828296	0.34525	-0.199392	0.213209	0.220211	0.0119462	0.249444	-0.537033	1.0527	0.0125259	-0.255925	0.470889	-0.215517	0.287128	-0.219363	0.317279	0.179527	0.913539	2.76273	0.0398134	0.0964468	-0.20734	0.142378	1.75284	-0.193285	0.782095	0.118772	0.534913	1.0494	0.917493	0.76113	1.05064	0.486651	-0.008	0.178	-0.041	0.063	0	0.203	0.445	0.182	10.7413	low
GSM1264504	Renner	-0.984827	-0.394903	-0.638374	0.0244143	-0.350856	-0.0942979	0.00743592	-0.0217296	-0.426905	-0.169633	0.058864	-0.0644916	-1.37267	0.118574	-0.69627	-0.550295	0.141456	-0.350034	-0.351061	-0.481884	0.0209926	-0.67974	0.0893567	0.0458672	-0.372744	-0.33375	-0.496816	-0.904536	-0.577562	0.118142	0.535023	0.845361	-0.975416	-3.07031	-0.694276	-0.782818	-0.642859	0.08	0.01	-0.043	-0.087	-0.092	0.566	-0.544	-0.122	10.4682	low
GSM1264503	Renner	-0.798526	-0.26399	-0.581219	-0.184896	-0.674808	-0.0317627	0.0553674	0.151399	-0.273152	-0.124149	0.531014	-0.754693	-0.592537	0.193595	-0.0153293	-0.209003	0.287491	-0.342512	0.337188	-0.252515	-0.151424	-0.82835	-0.564812	0.053532	-0.451879	-0.395201	-0.386448	-1.06003	-0.63385	0.194268	0.852297	0.612918	-0.959118	-2.43324	-0.636578	-0.835102	-0.77465	-0.075	-0.127	0.044	-0.145	-0.11	0.036	-0.312	-0.24	10.4901	low
GSM1264502	Renner	-0.472226	-0.144221	-0.342703	0.305214	-0.215819	-0.0729726	-0.016157	0.140927	0.064957	-0.263607	0.228802	-0.76941	-0.924673	0.0934225	-0.777681	-0.105854	-0.0208963	-0.202078	-0.414051	-0.339765	0.240906	-0.100612	-0.119977	-0.122676	0.138014	-0.188015	-0.398271	-0.538281	-0.170006	0.244085	0.954704	0.727812	-0.801119	-4.88018	-0.376541	-0.409421	-0.215328	-0.118	-0.039	-0.001	-0.089	-0.128	-0.012	-0.466	0.384	10.883	low
GSM1264501	Renner	-0.713644	-0.266084	-0.457781	0.0329243	-0.530542	-0.29744	0.0964269	0.133492	-0.00919812	-0.37276	0.0392871	-0.225869	0.241666	0.0745557	0.21331	-0.259105	0.227948	0.00176897	0.0909105	-0.547622	-0.0377019	-0.484355	0.599608	0.119244	-0.320652	-0.422658	-0.266677	0.997483	-0.367829	0.428231	0.296919	0.74758	-0.831224	-1.89244	-0.562269	-0.686643	-0.503012	-0.097	-0.095	-0.057	-0.181	-0.098	0.206	-0.545	0.362	11.0079	low
GSM1264500	Renner	-0.285883	-0.256354	-0.0111974	-0.102167	-0.282611	-0.121541	0.260034	-0.0279913	0.0694712	-0.543645	-0.177266	0.174993	-2.35363	0.0913998	-0.0798573	-0.0306571	-0.024404	-0.134265	0.783826	-0.0546362	0.0617929	-0.129213	-0.259533	0.0638635	0.205831	0.694834	-0.380564	0.360038	-0.54682	0.669712	0.356926	0.943885	-0.715374	1.01492	-0.555313	-0.595215	-0.547596	-0.073	0.015	-0.044	-0.044	-0.054	0.535	0.056	-0.218	11.3222	low
GSM1264499	Renner	-0.681934	-0.317267	-0.373154	-0.3058	-0.519791	-0.200189	-0.155231	-0.249233	-0.306124	-0.0446161	-0.0831657	-0.431065	0.342079	-0.0294789	-0.565543	-0.197126	0.1602	-0.226732	-0.125626	-0.372459	-0.208248	-0.656034	-0.573534	-0.0257945	-0.305617	0.0536098	-0.474033	0.192754	-0.636506	0.562043	0.155789	0.409837	-0.895765	-2.65876	-0.492412	-0.709535	-0.464311	-0.118	-0.17	-0.109	-0.128	-0.034	-0.338	-0.322	0.349	11.1934	low
GSM1264498	Renner	-0.573074	-0.158504	-0.426283	-0.163776	-0.422051	-0.124232	0.070675	-0.291926	-0.349322	-0.0421788	-0.140732	-0.570823	-0.492123	0.0422655	0.34083	-0.0633724	0.107563	-0.376957	-0.406786	-0.34991	0.0483494	-0.998736	-0.276978	-0.102927	-0.161006	-0.118588	-0.304587	-0.000321427	-0.513353	0.231525	0.78279	0.327729	-0.804325	-2.73895	-0.457767	-0.564855	-0.569068	0.064	-0.16	0.016	-0.166	0.008	0.053	-0.555	-0.17	11.3725	low
GSM1264497	Renner	-0.720256	-0.198913	-0.57459	0.0303677	-0.318445	0.103541	0.107613	0.0714263	-0.193174	0.0261976	0.13508	-0.45784	-0.206332	0.200232	-0.455857	-0.543788	0.31501	-0.18941	0.215773	-0.627392	-0.203169	-0.908346	-0.268256	-0.209335	-0.389942	-0.515889	-0.41987	-0.916327	-0.342674	0.112257	0.896379	0.526046	-0.872074	-5.15116	-0.723377	-0.895205	-0.696374	-0.031	-0.172	0.061	-0.084	-0.016	0.108	-0.552	-0.251	10.217	low
GSM1264496	Renner	-0.819019	-0.431794	-0.41774	-0.142389	-0.479546	-0.0962834	0.344836	0.590784	-0.415091	-0.191085	0.25824	0.292573	1.23807	0.252836	-0.176056	0.0246291	0.176409	-0.492415	0.729035	-0.426429	-0.11737	-0.970543	-0.202839	0.0830768	-0.275411	-0.28362	-0.408246	0.0026263	-0.476227	0.331043	0.607056	0.436138	-0.971543	-5.13305	-0.53464	-0.864225	-0.851839	0.122	-0.029	0.162	-0.045	-0.112	-0.234	-0.641	-0.542	10.7026	low
GSM1264495	Renner	-0.539077	-0.131515	-0.422733	-0.165915	-0.177167	-0.0819679	0.038944	-0.132354	-0.330059	0.174862	-0.145257	0.246392	-1.00191	-0.0512348	0.0610085	-0.452554	0.128241	-0.257348	0.258277	-0.48028	-0.0229427	-0.646743	-0.525562	-0.0788454	-0.152545	-0.361165	-0.456197	-0.452797	-0.424436	0.216304	0.451517	0.4386	-0.738779	-4.37011	-0.587069	-0.648486	-0.170497	-0.021	-0.083	-0.026	-0.059	-0.042	0.253	-0.307	0.27	10.919	low
GSM1264494	Renner	-0.461869	-0.382798	-0.0762963	-0.0710804	-0.12014	-0.167635	-0.265488	-0.128427	0.13227	-0.058928	-0.0714933	-0.724198	-0.22178	-0.226818	-0.340688	-0.444363	-0.321995	0.0740935	-0.149556	0.322762	0.337474	-0.544386	-0.263895	-0.23227	0.403281	0.132926	0.0140607	0.091058	1.32953	0.569922	0.118772	0.155221	-0.247647	-5.48469	-0.191455	-0.00270389	0.127169	-0.06	0.289	-0.01	-0.045	-0.133	0.193	0.957	0.676	10.7155	low
GSM1264493	Renner	0.0175454	-0.445407	0.448566	-0.134473	-0.400581	0.127971	-0.379622	-0.418982	-0.00698514	0.0595155	-0.166992	0.33419	1.81738	-0.389066	0.266473	-0.227235	0.110554	0.101392	-0.0377722	-0.0218199	0.329436	-0.686594	0.455691	-0.232285	0.401653	-0.196535	0.334509	0.591434	0.306042	0.581548	0.982968	0.553412	-0.492551	3.04561	-0.251004	-0.431781	-0.331558	-0.094	-0.158	0.102	0.251	0.034	-0.076	-0.118	-0.051	10.7361	low
GSM1264492	Renner	-0.588513	-0.31265	-0.29961	-0.254231	-0.573212	-0.230981	-0.00258431	-0.226937	-0.18065	0.301498	0.229391	2.71039	0.573802	0.109663	-1.05239	-0.146657	0.0376112	-0.507129	-0.473448	0.128282	0.00476511	-0.614038	1.21017	0.136068	-0.220057	-0.210647	0.0852379	-0.648084	0.604377	0.641343	0.980477	0.0361206	-0.466262	-0.997312	-0.274461	-0.35015	-0.445085	0.11	-0.16	-0.011	0.067	0.041	-0.125	0.073	-0.414	13.8496	high
GSM1264491	Renner	-0.02728	-0.306804	0.248963	0.0141959	-0.0279324	0.168774	0.0488467	-0.0142532	-0.0828254	0.320176	-0.169282	-0.410959	-0.368538	-0.311274	-0.709641	0.269977	-0.525887	0.214694	-0.125529	0.24394	0.125795	0.316326	-0.263895	-0.129758	-0.00825457	-0.0339961	0.00525794	-1.01729	-0.186886	0.252938	0.566629	0.468804	0.40163	2.45815	0.593289	0.54957	0.961304	-0.145	-0.301	-0.162	0.003	0.04	-0.014	-0.332	-0.303	11.9998	high
GSM1264490	Renner	-0.417177	-0.534266	0.1271	-0.363498	-0.304198	0.0926674	0.0552434	-0.0314308	-0.0397801	-0.155443	0.0326451	0.714205	-0.35309	-0.110721	-0.318545	-0.283737	-0.0617218	0.149559	-0.103414	0.0312082	0.180707	-0.694072	0.268163	-0.00370155	0.422607	-0.190976	0.0707706	0.0866364	1.52714	0.787055	0.186064	0.788591	-0.546177	-2.00609	-0.398824	-0.516909	-0.297627	-0.024	0.381	0.044	-0.017	0.13	0.306	1.058	-0.193	9.58583	low
GSM1264489	Renner	-0.522753	-0.239698	-0.278318	-0.108214	-0.280373	0.171267	-0.115878	0.215866	-0.0826433	0.171678	0.0767832	0.0464259	-0.214056	-0.0286218	0.699742	0.340224	0.294901	0.768334	-0.25702	-0.371372	0.0848895	-0.436122	1.89922	0.0780677	0.0381324	-0.27237	0.0496158	1.12645	0.637865	0.606863	0.118772	0.319468	0.0700825	2.22765	0.157715	-0.00612687	-0.284592	0.082	0.105	0.159	0.043	-0.046	-0.155	-0.093	0.742	10.6588	low
GSM1264488	Renner	-0.452362	-0.338311	-0.119924	-0.0250486	-0.221116	0.168286	-0.0297286	0.176929	-0.0163602	0.151718	-0.0722148	-0.160333	0.890489	-0.0854188	-0.0791372	0.0337689	0.254571	0.538666	-0.175619	-0.16874	0.142068	-0.309261	0.351024	-0.184789	0.122972	0.252308	-0.0181061	0.8781	0.526043	0.607113	0.118772	0.384976	-0.298257	1.98377	-0.0715266	0.127992	-0.207306	0.08	0.138	0.089	0.082	-0.048	-0.211	0.207	0.721	10.8585	low
GSM1264487	Renner	0.0272001	-0.0972154	0.142075	-0.0233265	0.352119	0.037682	0.159898	0.287176	0.440818	-0.116441	-0.0504081	0.0820788	-1.07915	0.0228843	0.0588118	0.454667	-0.344356	0.376261	-0.438856	0.618075	0.0613196	1.471	-0.691285	-0.11289	0.140799	-0.0686987	0.339745	-0.427741	1.58955	0.885367	0.631159	0.575381	1.40937	3.42242	0.594116	1.01132	0.818631	-0.213	0.223	-0.175	-0.075	-0.039	0.04	1.082	0.042	10.4734	low
GSM1264486	Renner	-0.916834	-0.606648	-0.407437	-0.162328	-0.404865	0.207109	0.32073	0.348058	-0.101199	-0.0914871	0.018136	0.292432	-0.770191	-0.0139757	0.407066	-0.699202	0.131458	0.742523	0.49701	-0.740022	-0.344726	-0.910992	-0.795952	-0.0656608	-0.38422	-0.201924	-0.396005	0.228864	-0.147841	0.167884	0.394147	0.582659	-0.762456	0.515164	-0.782857	-0.788062	-0.73905	-0.16	0.006	0.144	-0.211	-0.133	-0.467	-0.714	-0.473	9.56522	low
GSM1264485	Renner	-0.839534	-0.481436	-0.415693	0.107037	-0.244151	0.217736	0.341177	0.581635	0.0710338	0.233663	0.319356	-0.171193	0.651042	-0.0656521	0.129026	-0.481135	0.0720267	-0.288057	-0.176955	-0.432815	-0.0747598	-0.913427	-1.12304	0.121196	-0.233878	-0.280796	0.104426	-0.249404	-0.766772	0.0328919	0.994656	0.443921	-0.500843	-2.9448	-0.292414	-0.602665	-0.573939	0.045	0.202	0.138	0.058	0.1	0.021	-0.179	0.377	14.1664	high
GSM1264484	Renner	-0.759309	-0.655458	-0.126501	-0.0867846	-0.0188384	0.0204847	-0.116401	0.352282	0.0918536	-0.140616	0.429815	-0.586847	-0.0750223	0.0787835	0.0856624	-0.243308	0.144968	-0.0690529	0.915947	-0.183763	0.247946	-0.54837	-1.40651	0.209931	0.139255	-0.0295011	-0.0203391	0.819146	-0.455953	0.507507	0.913479	0.972706	-0.86285	-2.98911	-0.550423	-0.748095	-0.757628	-0.239	0.185	0.121	0.055	-0.122	0.08	-0.021	0.51	10.4734	low
GSM1264483	Renner	0.353613	0.250581	0.135939	0.333636	0.768044	-0.2216	0.259115	0.790706	0.3194	-0.00504135	0.321773	0.0945965	0.00221862	0.311242	0.624064	0.677231	0.284143	0.766612	0.592667	0.75857	0.476554	1.12721	-1.24079	0.359624	0.365752	0.0653539	-0.143892	0.303294	-0.271445	0.69293	0.56176	0.947711	1.39864	-0.0659212	1.03177	0.874054	0.476063	-0.1	0.265	0.17	0.115	0.048	0.079	0.106	0.453	11.5889	low
GSM1264482	Renner	-0.86185	-0.523302	-0.388261	0.190883	-0.354989	-0.136555	0.243889	0.633	-0.067202	-0.183324	0.331471	-0.112414	0.164425	0.482001	-0.311996	-0.064988	0.043467	0.158103	0.816804	-0.562419	-0.156698	-0.352923	-1.25823	0.13403	-0.230067	0.0135353	-0.179295	0.0328405	-0.414227	0.321207	0.570893	0.944559	-0.593244	-2.08243	-0.685405	-0.65525	-0.462532	-0.203	0.086	0.112	0.004	-0.14	-0.05	-0.394	-0.272	9.13111	low
GSM1264481	Renner	-0.463015	-0.449344	0.0066523	0.0456711	-0.0322338	-0.526392	0.137464	0.34341	0.189342	-0.418123	0.197904	0.171944	0.581526	0.214515	0.211085	-0.0443237	0.328882	0.0783009	0.195734	-0.0630661	0.0905296	-0.0498648	-0.377284	0.212763	0.18513	0.0462686	0.00338427	-0.233192	-0.46795	0.428624	0.68379	0.85288	-0.180306	3.1249	-0.22251	-0.239876	-0.356384	0.14	0.232	0.195	0.169	0.003	0.074	0.014	0.659	14.218	high
GSM1264480	Renner	-0.0903432	-0.511563	0.419042	0.227148	-0.170869	0.0308758	0.0476029	0.383466	0.185274	-0.384941	-0.108537	1.47525	-0.113643	-0.013698	0.0125655	-0.0234461	-0.0958001	0.220617	0.606216	-0.385381	0.103	0.214309	-0.586618	0.0689106	0.350816	-0.31641	0.380611	0.102112	0.468088	0.440875	0.579308	0.846493	-0.187992	4.47758	-0.095116	0.37926	0.0261079	0.015	-0.231	0.098	-0.034	0.067	0.334	-0.383	-0.071	12.7765	high
GSM1264479	Renner	-0.432923	-0.18083	-0.228347	0.265252	0.26427	-0.440365	0.40784	0.386534	0.288168	-0.0618981	0.586336	0.262921	0.349803	0.236894	0.163869	0.40152	0.540098	0.453831	0.108603	0.05999	0.710507	0.682074	0.316135	-0.127037	0.143924	-0.260375	-0.125896	0.180964	-0.80817	0.220515	0.692599	0.703185	0.650792	1.68473	0.583164	0.519582	1.07126	0.154	0.396	0.234	0.178	0.065	-0.08	-0.073	0.642	13.6048	high
GSM1264478	Renner	-0.380699	-0.293991	-0.0675853	0.0364228	0.303546	-0.374327	-0.0461228	0.52841	0.321566	0.134251	0.0589103	0.549165	-0.129091	-0.00395766	-0.0366425	0.347431	-0.159755	0.137196	0.736496	0.119006	-0.0434716	-0.354709	-2.35723	-0.153368	0.359729	-0.0184992	-0.107826	0.571537	0.279042	0.604076	0.54815	0.906429	0.485265	-2.12258	0.468662	0.425096	0.580903	-0.001	0.104	0.135	-0.021	-0.052	0.311	-0.205	0.966	9.74942	low
GSM1264477	Renner	-0.805284	-0.567711	-0.269807	0.136554	-0.631406	0.118694	-0.277413	0.406195	-0.293644	-0.13348	0.221022	0.504084	1.14538	0.11402	0.642513	-0.267569	0.366214	0.240294	0.909939	-0.300733	-0.167265	-0.903534	-0.987841	0.106405	-0.199639	-0.373937	-0.0923605	-1.01434	-0.75738	0.363504	0.515795	0.906783	-0.658426	-3.81009	-0.441612	-0.730912	-0.718771	-0.007	0.013	0.165	-0.042	-0.068	-0.032	-0.75	0.225	13.5687	high
GSM1264476	Renner	-0.338887	-0.305646	-0.0352108	0.0417033	-0.160236	-0.243089	-0.0399632	-0.194301	0.0873954	-0.320006	0.204447	-0.0955233	-0.507572	0.264363	-0.447628	-0.0594763	-0.0501282	0.0575682	0.0515534	0.55388	-0.164228	0.152214	0.817665	0.125987	0.104488	0.0313512	-0.0174681	1.97539	0.22894	0.818824	0.832138	0.646341	-0.0981066	-1.27768	-0.137366	-0.134776	-0.0892467	0.009	0.171	-0.06	-0.057	-0.079	-0.339	0.053	0.113	11.2011	low
GSM1264475	Renner	-0.181818	-0.0542891	-0.128721	0.138497	-0.254294	0.109558	-0.0231052	-0.751384	-0.221231	-0.630902	-0.203124	-0.493025	-1.14867	-0.382662	-0.444452	-0.584138	-0.210491	-0.0755083	-0.396114	-0.306411	-0.0944623	-0.36643	-0.355478	0.602572	-0.350042	-0.0536481	-0.185658	0.81325	-0.279509	0.46824	0.843144	0.447644	-0.355539	-5.17284	-0.321793	-0.645811	0.0518227	-0.149	-0.168	-0.276	-0.202	-0.075	-0.307	-0.655	-0.633	12.3424	high
GSM1264474	Renner	-0.62936	-0.282933	-0.356187	0.217013	-0.212646	-0.12687	0.419471	-0.0359292	-0.0134734	-0.276034	0.20533	-0.066981	0.774628	0.085983	-0.297132	-0.187967	0.0634836	-0.128816	-0.44928	-0.205562	0.0437752	0.552249	0.599608	0.34038	-0.255931	-0.262043	-0.139205	1.27531	0.392679	0.443116	0.862002	0.472072	-0.358852	-1.00072	-0.0337092	-0.143625	-0.112236	0.077	0.198	-0.032	-0.056	-0.177	-0.197	-0.168	-0.031	13.0316	high
GSM1264473	Renner	-0.253669	0.0261488	-0.281705	0.0397293	-0.369101	-0.0257356	0.00365961	-0.740496	-0.303225	-0.502917	-0.180733	-0.623808	0.334355	-0.187101	-0.32694	-0.572966	-0.0809553	-0.273738	-0.0184896	-0.349348	-0.349066	-0.537868	-0.704368	0.269985	-0.516211	0.0620378	-0.296988	1.15298	-0.0992315	0.502569	0.52967	0.453202	-0.671385	-4.8823	-0.368923	-0.643	-0.278904	-0.12	-0.068	-0.27	-0.234	-0.041	-0.25	-0.619	-0.874	11.9405	high
GSM1264472	Renner	-0.401882	-0.082989	-0.337532	-0.116	-0.709458	-0.142225	0.0721258	-0.649407	-0.195186	-0.373475	-0.00905733	-0.399538	0.0640114	-0.252582	-0.813994	-1.0849	-0.0339697	-0.114857	-0.224719	-0.260329	-0.106263	-0.492604	-0.495034	0.184112	-0.753684	-0.339248	-0.382245	-0.224348	-0.709087	0.545938	0.523814	0.53028	-0.941708	-5.69494	-0.64295	-0.876907	-0.557325	-0.215	-0.304	-0.332	-0.269	-0.012	-0.549	-0.4	-0.695	13.3742	high
GSM1264471	Renner	-0.427473	-0.201079	-0.236476	0.0239732	-0.258537	-0.257233	-0.0951801	-0.578701	0.013733	-0.415352	-0.0387981	-0.18636	0.465664	-0.21763	-0.497599	-0.458158	-0.188059	-0.143446	-0.265916	-0.264343	-0.035657	-0.107966	0.843831	0.250177	-0.343395	-0.456246	-0.208352	1.25983	0.0544267	0.626838	0.786103	0.359917	-0.314936	-3.20664	-0.0126725	-0.505097	-0.217195	-0.085	0.026	-0.194	-0.139	-0.111	-0.201	-0.285	-0.127	12.85	high
GSM1264470	Renner	-0.60193	-0.142652	-0.482449	0.0355015	-0.0587043	0.223205	0.237484	0.442345	-0.15756	-0.271978	0.225048	-0.342938	2.12634	0.0609153	-0.337104	0.334366	0.217863	-0.0702717	0.0666708	-0.0310511	-0.0995716	-0.638437	3.06801	0.322687	-0.377455	0.131452	-0.0722374	1.84864	-0.415387	0.444392	0.894727	0.658392	-0.256179	-2.73671	-0.127334	-0.0847232	-0.403039	0.244	0.157	0.085	0.028	-0.137	-0.18	-0.329	-0.26	14.1561	high
GSM1264469	Renner	-0.418597	-0.246671	-0.186285	-0.00583321	-0.421042	0.0408451	0.137711	-0.4057	-0.13857	-0.612263	0.0644519	0.235907	-0.18316	-0.185569	-0.503923	-0.868883	-0.0602877	-0.218407	0.214829	-0.441022	-0.107605	-0.00700422	-0.32495	0.24618	-0.299204	-0.468149	-0.132051	1.30552	-0.220889	0.559214	0.716418	0.322818	-0.825383	-7.29232	-0.377561	-0.695757	-0.3867	-0.038	-0.135	-0.178	-0.142	-0.2	-0.087	-0.42	-0.45	13.3884	high
GSM1264468	Renner	0.00496211	0.0330662	-0.0237592	0.00295039	-0.512853	-0.160785	-0.220665	-0.663065	-0.301166	-0.699985	-0.265498	-0.468475	-0.716122	-0.308883	-0.156734	-0.581504	-0.218707	-0.129018	-0.0096139	-0.151461	-0.240188	-0.346606	-0.987841	0.182323	-0.464304	0.463059	-0.202996	0.466893	-0.810369	0.671683	0.479857	0.183435	-0.817115	-6.91225	-0.319451	-0.734857	-0.0592027	-0.345	-0.355	-0.358	-0.217	-0.068	-0.104	-0.591	-0.742	11.0298	low
GSM1264467	Renner	-0.00185409	-0.162788	0.156416	-0.181644	0.217	0.245575	0.0896219	-0.0496638	0.0723272	0.153634	-0.169168	0.687155	-1.25681	-0.109973	0.367832	0.459011	-0.248829	-0.185204	-0.103131	0.585246	0.0995679	0.918839	1.32356	-0.0747306	0.241271	0.280201	0.268009	0.915684	-0.187514	0.687641	0.251154	0.16061	0.924933	2.49875	0.518626	0.878177	0.485114	-0.171	0.077	-0.135	-0.07	-0.028	0.054	0.766	-0.056	11.5283	low
GSM1264466	Renner	-0.0693211	-0.111736	0.0636262	0.0932687	0.634576	-0.280442	-0.0986936	0.321087	-0.0830651	0.0284547	0.190147	0.910394	-0.430331	0.317137	0.589279	0.603476	0.0155968	0.311885	0.288355	0.772427	0.0571598	0.458242	-0.172311	-0.0484548	0.415539	0.354734	0.311196	0.673233	0.400425	0.892605	0.171728	0.762762	0.939598	3.44592	0.471535	0.500156	0.460823	-0.115	0.49	0.096	-0.028	-0.11	0.206	1.161	0.276	9.34752	low
GSM1264465	Renner	-0.530647	-0.17068	-0.362376	-0.208995	0.243218	0.244713	0.0781102	0.0399706	0.173013	0.351911	-0.182771	0.83682	-0.461227	0.190111	-0.38987	0.0886807	-0.0793496	0.337767	-0.0601291	-0.166878	0.091496	-0.435742	1.95156	0.0509546	0.13211	-0.192797	-0.329915	1.94149	0.960573	0.610696	0.285792	0.366355	0.852937	-1.65174	0.391847	0.538161	0.207206	0.078	0.312	0.165	-0.075	-0.063	-0.084	0.623	1.011	11.8581	high
GSM1264464	Renner	-0.141043	-0.322865	0.212056	-0.215246	0.268494	-0.0421051	-0.295831	-0.205616	-0.0664085	-0.152124	0.0399806	0.125084	0.427044	-0.136695	-0.353104	0.133487	-0.310342	0.352486	-0.072165	-0.0738852	0.318835	0.34095	1.43258	-0.123059	0.504457	-0.279509	0.270767	0.438889	0.646808	0.800758	0.388463	0.622853	1.62291	-1.43598	0.344388	0.56716	0.795824	-0.054	0.111	-0.07	-0.062	0.091	0.386	0.574	0.742	10.9976	low
GSM1264463	Renner	0.500115	0.519941	0.0170395	-0.0329407	1.80782	0.131371	0.0715281	-0.348593	0.260026	0.0288721	0.0934045	0.467428	-0.638881	0.210425	1.46235	1.15319	-0.295179	0.14957	-0.122623	0.414715	0.167821	1.0874	-0.782868	-0.23574	0.360121	-0.496644	0.0381321	0.048316	0.0178742	0.769945	0.12361	0.224706	2.23892	7.57254	1.37629	1.98781	1.0681	-0.264	-0.063	-0.179	-0.059	-0.02	0.329	0.403	-0.377	8.96108	low
GSM1264462	Renner	-0.331003	-0.430943	0.0947043	-0.305162	-0.128707	-0.0504236	-0.238652	-0.240558	-0.199721	-0.0382729	-0.206312	-0.157096	-1.35722	-0.0870619	-0.423221	-0.213647	-0.227884	0.0082249	-0.253083	-0.107835	0.210617	-0.0521829	-0.185394	-0.196299	0.139021	-0.017751	0.0967572	0.100638	1.15762	0.652512	0.183012	0.469338	-0.150106	-1.31611	-0.403611	-0.357603	0.0444792	-0.002	0.192	-0.058	0.069	0.025	0.262	0.665	0.752	10.0637	low
GSM1264461	Renner	-0.367857	-0.0855617	-0.306726	-0.185237	0.339495	0.467825	-0.141086	0.173861	-0.00569494	0.158431	-0.454376	-0.111936	-0.839708	-0.248773	-0.340878	0.268224	-0.249741	0.885196	0.00458419	-0.166393	-0.0161511	0.236604	1.22325	-0.214006	-0.0217857	-0.35404	-0.150497	-0.513962	-0.319624	0.274655	0.189663	0.0487635	0.932008	4.66174	0.761102	0.830724	0.437164	-0.232	-0.245	-0.012	-0.047	0.072	-0.228	-0.476	0.076	13.3845	high
GSM1264460	Renner	-0.691139	-0.377657	-0.345764	-0.373121	-0.280237	0.142854	-0.293109	0.106519	0.0892781	0.435227	-0.319254	0.0327371	-0.0904705	-0.000547597	0.0634374	-0.322958	0.0709167	-0.556998	-0.528827	-0.514586	-0.116681	-0.496444	2.77581	-0.227549	-0.127925	-0.306314	-0.288775	-0.270775	-0.555382	0.683597	0.449577	0.336143	-0.718135	-3.56929	-0.259524	-0.411532	-0.131074	0.265	-0.184	-0.015	0.014	0.029	0.257	-0.243	0.347	13.5121	high
GSM1264459	Renner	-0.605561	-0.35473	-0.285797	-0.244807	-0.143506	0.105694	-0.173522	0.189924	0.0628956	0.674749	-0.123966	-1.18384	-0.214056	-0.285506	-0.0720672	-0.0403189	0.0316538	0.431749	-0.0744364	-0.385647	-0.0708445	-0.373059	0.228913	-0.125903	-0.133072	-0.037145	0.107582	-0.390158	0.574783	0.345752	0.460166	0.123281	0.162746	-3.61809	-0.0529938	-0.0799274	-0.345816	0.143	-0.023	-0.011	0.016	0.038	-0.016	-0.258	0.517	12.5163	high
GSM1264458	Renner	0.378966	0.226475	0.196673	0.156046	0.94695	-0.152481	0.00442279	0.115094	0.203505	-0.227647	-0.197033	0.604133	1.50842	0.488332	1.02896	0.909669	0.30567	-0.0316271	-0.650291	-0.168	0.116682	1.14951	0.752248	0.0784998	0.0587777	0.85171	0.138461	0.386567	-0.857009	0.984782	0.139011	0.848223	1.17691	4.26644	1.21915	0.973188	1.12098	0.339	-0.094	-0.054	0.021	0.044	0.14	0.285	0.07	12.4275	high
GSM1264457	Renner	-0.412626	-0.196098	-0.201344	-0.0584061	0.108612	-0.0121308	0.104427	-0.0501481	-0.208831	-0.099048	-0.151562	0.534911	0.257114	0.0534433	0.248093	0.252597	0.246796	-0.349841	0.0150552	0.522546	-0.034815	0.0117578	-0.752341	-0.0920147	0.0798935	0.442685	-0.199308	-0.0968594	-1.09381	0.985658	0.273134	0.97177	0.596223	0.817676	0.221076	0.437683	0.108322	0.384	-0.101	-0.088	-0.049	0.032	0.322	0.012	0.024	11.6752	high
GSM1264456	Renner	-0.35376	-0.235836	-0.100991	0.204371	0.239272	-0.222948	0.272325	-0.0579473	-0.0143586	-0.142368	-0.259382	0.283774	-1.00964	0.17036	0.055681	0.573875	0.294192	-0.247786	-0.0117292	0.303452	0.219297	-0.0910035	0.311774	0.0725345	0.0463856	0.359475	-0.079451	0.184648	-0.68103	0.987127	0.382468	0.968321	0.622931	-0.0770962	0.135348	0.430471	0.475522	0.407	0.107	-0.067	0.004	-0.047	0.407	0.219	0.35	12.0694	high
GSM1264455	Renner	-0.395403	-0.0918573	-0.292497	-0.0314197	0.104684	-0.0252485	-0.100966	-0.266221	-0.15858	-0.243593	-0.264844	0.312601	0.226217	0.0972607	-0.0442126	0.241942	0.153834	-0.152724	-0.260277	-0.103328	-0.0681381	-0.0651693	0.0893567	-0.0692118	-0.130236	0.586526	-0.0531699	-0.405633	-0.90012	0.959789	0.148412	0.922696	0.720922	1.55477	0.280062	0.11014	0.0542361	0.451	-0.126	-0.099	-0.101	0.067	0.327	0.223	-0.303	11.7396	high
GSM1264454	Renner	-0.610634	-0.302639	-0.314735	-0.0866863	-0.626727	-0.52208	-0.163835	-0.257759	-0.132807	-0.125649	0.196391	-0.335723	1.10676	-0.287607	0.701963	-0.0255739	0.0512713	-0.151861	-0.124281	-0.415775	0.110814	-0.868556	0.817665	-0.147126	-0.131028	0.0352093	-0.152591	0.453628	0.148624	0.487358	0.330319	0.66436	-0.528166	-4.5373	-0.380087	-0.358517	-0.162514	0.384	0.076	0.059	0.07	-0.007	-0.154	0.044	0.459	13.3704	high
GSM1264453	Renner	-0.348872	-0.133985	-0.192723	-0.202867	0.555898	-0.123387	-0.045531	-0.408485	-0.127637	-0.238305	-0.285756	-0.456009	-0.39171	0.422254	-0.0885527	0.459203	0.561899	-0.0871722	0.708666	1.06678	0.0384892	0.103843	0.368469	-0.00840184	-0.16022	0.159785	-0.162511	0.554588	-0.915112	0.954622	0.336849	0.955707	0.964487	5.41811	0.49393	0.539867	0.463525	0.54	0.015	0.048	-0.029	0.005	0.382	-0.108	0.039	11.737	high
GSM1264452	Renner	0.194706	0.139118	0.0876434	0.514705	0.760311	-0.362263	-0.226145	-0.393704	0.0514706	-0.132725	0.00980679	-0.562961	1.73242	0.120034	0.499712	0.752684	0.0460361	-0.0376732	-0.288217	0.931565	0.534577	0.592584	-0.346756	0.366922	0.551504	0.427603	0.170313	0.106534	0.0529364	0.834879	0.617593	0.656781	0.978939	0.28346	0.466401	0.815928	0.62028	0.257	-0.125	-0.053	0.083	0.085	0.526	0.262	0.428	11.0479	low
GSM1264451	Renner	-0.201436	-0.0849428	-0.0980439	-0.0204745	0.746173	-0.127182	-0.0553618	0.110145	-0.0446588	-0.136532	-0.0641213	0.00481509	-0.190884	0.0492365	0.188204	0.345977	0.113643	0.334541	1.28109	0.633872	-0.0838639	-0.131651	-1.60276	-0.134791	0.0967724	0.0118191	-0.0270229	0.371829	-0.616898	0.955725	0.786323	0.995233	0.531638	3.46869	0.331581	0.511752	0.159178	0.355	-0.005	0.076	0.009	0.028	0.489	0.021	0.643	12.2471	high
GSM1264448	Renner	-0.349674	-0.442905	0.106859	-0.01693	-0.0337532	-0.30218	-0.0423593	0.133792	0.0281243	-0.161427	-0.0753082	0.524815	1.75559	0.165977	0.553631	0.282953	0.292618	0.120589	0.368936	1.38428	0.222973	0.256896	0.359746	-0.163176	0.479789	0.0553607	0.395562	-0.25751	0.623358	0.497122	0.96869	0.836202	-0.0724236	3.51463	0.196811	0.0508358	0.114426	0.044	0.195	0.15	0.209	-0.006	-0.05	0.353	0.998	13.1011	high
GSM1264447	Renner	0.495499	0.331306	0.221082	1.98273	1.74916	-0.190348	0.382924	0.0988388	0.552431	-0.223456	0.794006	-0.35276	-0.700674	0.614989	0.123367	0.571118	-0.37972	0.0703162	-0.105463	1.06842	0.336802	0.45788	-1.5199	0.10812	0.610024	1.45662	0.207468	0.563431	-0.219549	0.898427	0.787292	0.787853	1.18564	0.0243775	0.423903	0.394647	0.803106	-0.086	0.375	-0.074	0.187	-0.021	-0.013	0.623	0.547	8.94047	low
GSM1264446	Renner	-0.444099	-0.150361	-0.323866	0.102248	0.0573035	-0.486086	-0.274009	0.182177	0.172459	0.106936	0.572961	-0.0528905	-0.268125	-0.0317748	0.800594	-0.0323237	-0.29377	0.0447911	-0.146483	-0.0134334	0.582948	-0.214876	-0.403451	0.0359611	-0.191539	0.166028	-0.106745	-1.21626	-0.204227	0.181698	0.792509	0.30865	-0.00687772	-3.73898	0.0639647	-0.430365	-0.241794	-0.207	-0.095	0.079	-0.173	-0.15	0.389	0.201	0.383	10.5352	low
GSM1264445	Renner	-0.0750561	0.123827	-0.235031	-0.195472	0.226208	-0.466039	-0.263284	0.148769	0.0421015	0.214539	0.129744	-0.640027	0.226217	0.0221903	-0.0520454	0.0437367	0.194676	0.144735	-0.11247	-0.748336	-0.29867	0.175741	-0.124338	-0.200815	0.0195062	-0.264096	-0.121521	0.0932688	0.413022	0.411938	0.124342	0.504124	0.630409	-0.807412	0.295866	0.438189	-0.0643795	-0.023	0.149	-0.051	0.003	-0.021	-0.578	0.058	-0.059	9.56135	low
GSM1264444	Renner	0.309418	0.313682	0.0340353	-0.103466	0.463177	-0.326417	-0.428822	-0.189188	-0.187481	-0.186763	-0.140711	-0.102469	0.318906	-0.261916	-0.126782	1.04521	-0.14763	0.660063	-0.662819	0.1445	-0.0538332	0.463914	0.119885	0.0246898	-0.00163309	-0.185342	0.193326	0.290029	0.357126	0.563088	0.339346	0.51643	1.12818	-3.27674	0.639311	0.425106	0.667719	-0.247	0.027	-0.192	-0.007	-0.036	0.24	0.505	-0.191	9.86277	low
GSM1264443	Renner	-0.206096	-0.448454	0.240182	0.0911625	0.162108	-0.448657	0.208088	0.0965043	0.194599	0.604907	0.0329931	-0.763988	1.29214	-0.238085	0.721319	0.0582262	-0.118753	-0.156298	-0.243897	0.678582	0.450005	0.874434	1.97772	-0.090315	0.67897	0.218923	0.527221	0.225179	1.14286	0.245789	0.605056	0.168563	-0.12815	0.0968081	0.0877185	0.240927	0.399933	0.166	0.485	0.152	0.153	0.106	-0.049	0.546	0.632	9.79966	low
GSM1264442	Renner	0.904157	0.818886	0.126384	0.37989	2.35927	0.261313	0.0339614	-0.0585797	0.652268	0.183022	0.354443	-0.20231	-1.08688	0.455507	1.86498	1.52997	0.148384	1.54825	-0.145906	0.951464	0.37699	1.95549	0.660664	0.0746892	0.357435	0.357481	0.21183	-0.225822	0.332657	0.725958	0.12359	0.347599	2.83312	5.05605	2.43394	2.61544	1.48491	-0.08	0.198	-0.078	-0.017	0.071	0.147	0.539	0.067	9.6206	low
GSM1264441	Renner	-0.160848	-0.0864117	-0.0600925	-0.103802	0.487172	-0.0647428	-0.204675	-0.411016	-0.134861	-0.394043	-0.102988	-0.409938	-1.08688	-0.272761	0.0618755	0.19457	-0.154878	-0.466249	-0.361461	0.0668873	-0.012978	0.417835	-1.25823	0.314381	0.11987	1.29842	-0.00832578	0.39541	0.103807	0.653077	0.469639	0.276231	0.454224	-2.56033	-0.00701367	0.0136282	0.41266	-0.213	0.364	-0.242	-0.022	-0.036	-0.007	0.407	0.479	12.9079	high
GSM1264440	Renner	0.41925	0.546415	-0.0750221	0.374295	1.29892	-0.0769822	-0.12106	-0.0842957	0.632478	-0.0277934	0.339553	-0.193983	1.02952	0.401136	0.718357	0.750878	0.328691	0.730028	-0.452781	0.943131	0.445865	0.923819	1.36281	0.069088	0.35219	0.630398	0.303663	0.656284	0.0543215	0.547212	0.164584	0.632523	2.06994	1.54575	1.5507	1.75967	1.47617	0.022	0.144	-0.019	-0.032	0.112	0.871	0.513	0.329	10.6047	low
GSM1264439	Renner	0.220641	-0.354266	0.59276	-0.185796	-0.147844	-0.198053	0.0958908	0.0351651	0.111026	0.10993	-0.317385	-0.131414	-0.18316	0.0376017	-0.144179	-0.0629612	-0.153947	-0.335137	-0.488134	0.680214	0.128186	-0.188988	0.826387	0.170781	0.461737	0.276201	1.35691	-0.181606	0.326132	0.357895	0.984038	0.186245	-0.269531	-0.19699	-0.296519	-0.149122	0.0733968	-0.047	0.264	0.007	0.501	0.028	0.254	0.703	-0.04	9.27152	low
GSM1264438	Renner	0.142645	0.106356	0.0824581	0.385726	1.07966	-0.0367789	0.042866	-0.153448	0.345722	-0.209005	0.199571	0.116864	2.28855	0.31543	1.02139	0.614037	-0.144092	-0.296103	-0.470339	0.521862	0.472544	0.861467	0.778415	0.455822	0.30201	2.83672	0.696772	0.419729	0.458876	0.736658	0.969077	0.380557	1.0108	-1.06795	0.681491	0.711001	0.790763	0.077	0.441	-0.044	0.28	-0.005	-0.096	0.828	0.012	13.8277	high
GSM1264437	Renner	0.0420282	-0.307569	0.375339	0.0314475	0.227532	-0.506351	0.0694839	-0.15929	0.0616545	0.0162126	-0.0818283	0.312626	-1.72798	0.00628169	-0.586929	0.286522	-0.185683	-0.223715	-0.54844	0.238532	0.230181	-0.392554	-0.102533	0.197451	0.406863	0.00535531	0.0969273	-0.612711	0.54246	0.52662	0.925774	0.332686	0.359923	-5.14259	-0.146056	0.121621	-0.103916	0.001	0.58	-0.001	0.242	-0.034	-0.226	0.911	0.222	10.6009	low
GSM528279	Barretina	-0.25421	-0.0313417	-0.247632	-0.0540842	0.286133	-0.232583	-0.0153539	0.381643	-0.0739382	-0.226676	0.288945	0.0517879	-0.983917	-0.131844	-0.20267	0.159329	-0.0289032	-0.343419	-0.0989453	-0.0638244	0.0916298	0.0774618	0.429316	-0.110589	0.125993	-0.327656	0.0519728	1.24552	-0.192046	0.168352	0.104652	0.177756	1.6233	0.0983488	0.019627	0.0236687	-0.382172	0.03	0.345	0.08	-0.262	-0.109	0.255	0.128	0.396	10.7531	low
GSM528281	Barretina	-0.42483	-0.131268	-0.32618	-0.0471306	-0.290512	0.187338	-0.17948	0.0214182	-0.0678838	-0.234953	-0.0228288	0.38686	2.91284	-0.264476	-0.243183	-0.290686	0.600753	-0.186202	-0.204659	-0.306693	-0.147268	-0.113554	-0.191764	0.0879772	-0.0146236	-0.126676	-0.186723	-1.3624	-0.464159	0.395405	0.40167	0.243867	0.178351	-5.16716	-0.169836	-0.180397	-0.711995	0.2	0.354	0.095	-0.206	-0.087	-0.349	-0.164	0.566	11.4874	low
GSM528282	Barretina	-0.586543	-0.213052	-0.41499	-0.188837	-0.119162	0.215741	0.0446486	0.404594	-0.343885	0.141502	0.032564	-0.885834	-1.55176	-0.0998687	-0.114008	-0.330122	0.0248561	-0.300074	-0.0895017	-0.0727332	-0.0349445	0.0751639	1.47212	0.190875	-0.516448	-0.07835	-0.0653681	2.16036	0.386279	0.142465	0.222882	0.189006	-0.457172	-4.53503	-0.382396	-0.531579	-0.389369	-0.062	0.208	-0.067	-0.001	-0.202	-0.401	0.447	-0.395	12.2461	high
GSM528284	Barretina	-0.356313	-0.304491	-0.0575799	-0.682898	-0.355477	-0.362897	0.0708922	-0.0744308	-0.11785	-0.0334978	-0.0296898	0.643384	0.198656	-0.0715099	-0.528535	-0.576079	-0.192449	-0.408597	-0.404066	0.343162	0.238564	-0.355917	0.318135	-0.109692	0.0796878	-0.251168	0.100258	0.210246	0.550648	0.4589	0.9788	0.668672	-0.663384	-5.06022	-0.638037	-0.270366	-0.345695	-0.137	0.238	-0.004	0.161	0.02	-0.083	0.952	0.255	13.4015	high
GSM528285	Barretina	-0.27379	-0.162359	-0.123812	-0.165301	0.000859642	-0.107894	0.0849729	-0.356306	0.125215	0.0255333	0.156886	-0.332848	-1.13499	-0.0378473	0.248983	0.283388	-0.411489	-0.113775	-0.516973	-0.085242	0.281335	0.525693	1.25742	-0.0387086	0.294762	-0.444123	0.327747	1.69181	0.753419	0.170651	0.485397	0.306458	0.36014	1.83944	0.191257	-0.181057	0.252038	0.115	0.428	0.046	0.158	0.083	0.134	0.514	-0.032	11.651	low
GSM528286	Barretina	0.0757012	0.149371	-0.0818556	0.686033	0.417142	0.414232	0.345411	0.158966	-0.296023	-0.0342232	0.141252	-0.655144	0.110093	0.179372	0.282939	0.399494	-0.19258	-0.0841219	-0.420496	0.291987	0.00627724	-0.00236981	-0.797509	-0.0892639	0.405988	-0.126358	0.0162336	-0.77544	0.65151	0.707084	0.329197	0.106511	0.758137	2.11164	0.184317	0.634641	0.261658	-0.081	0.316	0.054	-0.002	0.169	0.175	0.493	-0.444	9.82568	low
GSM528288	Barretina	0.0583773	0.0518605	0.00724083	-0.186164	0.331665	0.224085	0.123613	-0.242436	-0.11629	0.522657	0.205037	-0.853493	-0.363978	0.115534	0.470432	0.10725	-0.181874	-0.48861	-0.482561	0.526881	0.327568	0.378551	-0.720833	0.0967196	0.637678	-0.410584	0.317419	-1.20959	1.89954	0.330309	0.20168	0.0412295	0.273809	2.20508	-0.399854	-0.0495707	0.305646	0.013	0.553	0.098	0.276	0.249	-0.122	0.895	-0.201	9.52039	low
GSM528289	Barretina	0.0500573	0.163137	-0.125644	0.101275	0.435008	-0.0517026	-0.326017	-0.481496	0.207512	0.023704	-0.0126654	0.0928847	0.193447	-0.179516	0.0179748	-0.00584135	0.0695907	-0.257869	-0.125583	0.46278	0.263527	0.154545	-0.782174	0.027313	0.22526	0.282289	0.244144	-0.630724	0.969943	0.46446	0.266776	0.20617	0.394093	2.1244	0.322087	0.621623	0.7475	-0.164	0.095	-0.059	-0.022	0.064	0.081	0.738	0.013	10.6617	low
GSM528290	Barretina	-0.501786	-0.145259	-0.396141	-0.111663	-0.00582118	-0.613075	-0.0556402	0.195782	0.0660517	-0.269285	0.0973841	-0.107248	0.198656	-0.362999	0.0501822	0.094288	0.0248525	0.213761	-0.324099	-0.316962	0.197747	0.057969	-0.540643	0.11152	-0.0866802	0.100979	-0.0463159	-1.41097	0.231507	0.251932	0.174618	0.130823	-0.11991	-3.37185	-0.127581	-0.477738	-0.624149	-0.162	0.279	-0.018	-0.286	-0.198	-0.395	-0.294	0.442	10.3203	low
GSM528291	Barretina	0.615395	0.870259	-0.283183	1.62019	2.61462	0.560077	0.579065	0.202629	0.646234	0.247234	0.640204	-0.448774	-0.94224	0.660727	1.16665	1.69179	-0.104894	-0.0907847	0.0331367	1.15326	0.0755745	1.3527	0.490657	0.182702	0.548034	0.310223	0.153732	-0.792644	0.797196	0.843974	0.568427	0.202305	2.20033	1.89679	1.3074	1.83054	2.22323	-0.019	0.263	-0.156	0.401	0.11	0.798	0.831	-0.233	9.89137	low
GSM528294	Barretina	-0.46185	-0.22902	-0.2587	-0.230434	-0.495958	-0.0914767	0.106952	0.00878962	-0.385966	0.287155	-0.211303	-0.344937	1.38123	-0.202682	-0.505355	-0.628964	-0.265176	0.125054	-0.0550548	-0.719516	0.118679	-0.255173	-1.34575	0.318355	-0.302674	-0.294127	-0.325379	-0.546728	-0.658614	0.0417402	0.922483	0.395604	-0.728134	-0.360032	-0.607321	-0.699385	-0.767917	-0.195	0.187	0.042	-0.347	-0.197	-0.567	-0.418	0.082	11.0198	low
GSM528295	Barretina	-0.204311	-0.0457764	-0.176149	-0.420609	0.00560685	-0.00219154	0.275892	0.244523	-0.180278	0.0308272	0.0107102	-0.618598	-2.09356	0.0385474	-0.300018	0.167674	-0.354971	-0.265904	-0.898587	-0.22498	0.028807	-0.180307	-0.571313	-0.0293579	0.346153	1.67901	0.115414	0.781012	-0.155156	0.272326	0.997532	0.204805	1.32185	0.607266	-0.204288	-0.0582022	0.122454	0.071	0.368	0.155	0.186	0.103	-0.122	0.129	0.799	11.611	low
GSM528297	Barretina	-0.540699	-0.136182	-0.449464	-0.286767	-0.610683	0.0865955	0.271249	-0.00609289	-0.0293862	-0.257526	-0.454566	0.767183	0.724823	0.712422	-0.632689	-0.162136	0.393336	0.23957	-0.0437522	-0.43714	-0.661453	-0.577802	0.214622	-0.131829	-0.497956	-0.476772	-0.264933	-1.07904	-1.09047	0.386622	0.34332	0.430982	-0.149974	-1.29968	-0.153108	-0.515097	-0.524209	-0.105	-0.316	-0.035	-0.234	-0.144	-0.654	-1.041	-0.722	10.4337	low
GSM528301	Barretina	0.0303814	0.0926895	-0.0692312	-0.0260645	0.698194	0.0162893	0.282318	0.648479	-0.0244041	0.0359053	0.0330024	0.139199	-1.85912	0.278037	0.213904	0.845594	-0.471118	-0.182959	-0.197067	0.646448	0.140271	0.278708	0.912379	-0.0171169	0.362453	-0.250629	0.0725708	1.08765	1.58675	0.754886	0.4628	0.710482	0.933732	-1.834	0.088266	0.971448	0.389699	-0.028	0.486	0.063	0.152	-0.079	0.122	0.804	0.114	11.7811	high
GSM528302	Barretina	0.131671	-0.124501	0.284636	-0.0450674	0.0200677	-0.140308	-0.214273	0.567517	0.288299	0.141895	-0.0692119	-0.0388911	-0.160804	0.0148008	0.183793	-0.229036	-0.419881	0.172487	-0.180863	1.20668	0.50494	0.481512	0.651678	0.0375255	1.02097	0.383993	0.748696	0.103986	0.83479	0.395654	0.399772	0.241964	-0.196725	4.96195	0.0895557	0.131364	0.940081	-0.116	-0.07	0.036	0.113	-0.037	0.166	-0.442	0.102	10.4375	low
GSM528303	Barretina	-0.209905	-0.0732812	-0.151805	-0.10281	0.168413	-0.0482481	-0.177299	0.0629601	0.13874	-0.0363622	0.0186134	-0.511146	-0.530684	0.105644	-0.010887	0.305013	-0.0833754	-0.0138436	-0.218388	-0.323446	0.0115619	0.0798684	-1.10805	-0.0914042	0.264687	0.0444287	0.0844649	1.41958	0.46105	0.791063	0.762994	0.61954	0.22419	-1.48696	0.30213	0.425709	0.525319	0.266	0.201	0.004	0.069	-0.011	0.209	0.232	1.021	11.5969	low
GSM528304	Barretina	-0.423728	-0.148406	-0.305913	-0.269729	-0.0550944	-0.0673926	0.0624013	0.096635	-0.069067	-0.148772	-0.028111	0.210817	-1.37984	-0.0745498	0.104789	0.095377	0.0823677	0.0337752	0.0243608	-0.0435395	-0.0102571	-0.220674	1.29193	0.0501049	-0.261926	-0.0568675	-0.32907	1.3032	0.885918	0.356163	0.234738	0.556383	-0.271917	-4.03252	-0.0048659	-0.269535	0.0292804	-0.042	0.478	-0.109	-0.123	-0.159	-0.04	0.549	-0.117	11.7721	high
GSM528307	Barretina	-0.0367617	0.152546	-0.210341	-0.16585	0.0769651	-0.044852	-0.234001	0.125698	0.281739	-0.360377	-0.070071	-0.0839184	-0.384816	-0.184153	-0.0154908	0.157937	0.0703262	0.182891	-0.2806	0.329737	0.0279162	-0.079964	-1.06204	0.056656	0.062699	-0.142531	-0.0408153	-0.506248	0.08135	0.782608	0.13461	0.763384	-0.0770802	-6.41707	0.129405	-0.329019	0.436205	0.006	0.529	0.038	0.248	-0.022	-0.108	0.582	0.512	11.8918	high
GSM528308	Barretina	0.79253	0.894815	-0.11365	2.62598	2.73696	0.412272	0.825019	0.698908	0.36469	-0.284037	0.44197	0.225337	0.198656	0.717285	0.951399	2.20712	-0.0849161	0.302006	-0.0222871	1.38673	0.0557028	0.986601	1.59097	-0.0613978	0.423734	0.226682	0.164217	0.404549	0.231683	0.584973	0.418453	0.232032	2.05748	2.36529	1.353	1.39805	1.74781	-0.146	0.091	-0.2	0.1	-0.013	0.672	0.085	0.296	9.61957	low
GSM528309	Barretina	-0.110301	0.0195838	-0.144317	0.431092	-0.0132474	-0.726188	-0.65883	-0.23746	0.276381	-0.0239429	0.230109	0.688508	0.370572	-0.579175	1.10022	-0.258057	0.329799	1.63052	0.442712	0.219101	0.201034	0.324788	1.13474	0.452957	0.0743103	0.289502	0.305265	-1.22274	0.0348259	0.202526	0.197175	0.1484	-0.535418	-2.52562	0.330095	0.0039681	-0.330137	-0.557	-0.353	-0.238	-0.316	-0.425	-0.066	-0.493	0.262	11.3779	low
GSM528310	Barretina	-0.370573	-0.144568	-0.251116	-0.318532	-0.536559	0.0471953	0.0534865	0.428608	0.464307	0.146696	-0.0124139	-1.14165	-0.525474	0.210506	-0.213627	-0.171277	-0.291362	-0.600189	-0.375486	-0.602487	-0.174802	-0.252429	0.425482	0.0473952	-0.195135	-0.00623416	-0.299338	0.625165	1.61937	0.460088	0.82631	0.316312	-0.630744	-1.69649	-0.506466	-0.58327	-0.318821	0.13	0.425	0.055	0.234	0.125	-0.443	0.593	0.251	10.252	low
GSM528311	Barretina	-0.512338	-0.25087	-0.29052	-0.074637	-0.653218	0.113785	0.269444	-0.442009	-0.17783	-0.090584	-0.20929	0.242528	-0.864096	-0.0949266	-0.48335	-0.683679	-0.208965	-0.592157	-0.26096	-0.941222	-0.469757	-0.645159	-1.37258	0.178124	-0.178683	-0.186873	-0.573928	-0.892831	0.539776	0.486757	0.440641	0.655755	-1.07125	-3.16888	-0.909002	-0.962822	-0.858863	0.015	0.365	0.144	-0.006	0.055	-0.709	0.481	-0.307	10.3358	low
GSM528312	Barretina	-0.467835	-0.305368	-0.180519	-0.0619389	-0.36326	0.197495	-0.0539432	0.262829	-0.0649474	0.170372	-0.0967083	0.0187864	-0.791162	-0.458051	-0.0805148	-0.488475	-0.208539	0.177647	-0.261278	-0.515446	0.208718	-0.183104	0.00759487	-0.0881312	0.347336	-0.0673241	0.278885	0.305373	0.929193	0.216998	0.538353	0.65617	-0.856047	1.65427	-0.525834	-0.506368	-0.363314	-0.116	0.187	0.13	0.05	0.116	0.07	0.088	0.201	11.7064	high
GSM528314	Barretina	-0.761901	-0.304967	-0.507705	0.046527	-0.470439	0.0313861	-0.120382	0.756271	-0.10867	0.126024	0.156736	-0.236625	0.782128	-0.0505433	0.0136654	-0.267596	0.0193619	0.397736	0.468158	-0.552344	-0.125658	-0.672985	-1.15406	0.386972	-0.327004	-0.35518	-0.275236	-1.57998	-0.836247	0.344023	0.920732	0.929119	-0.186868	-9.2846	-0.333388	-0.622042	-0.958452	-0.211	0.132	-0.004	-0.085	-0.398	-0.638	-0.603	0.343	10.9	low
GSM528316	Barretina	0.120977	0.184724	-0.0708298	0.0929137	0.862121	0.0825299	0.115199	0.0620229	0.481312	-0.0586719	0.24196	0.0895446	-0.775534	0.0536739	0.538766	0.611438	-0.0100755	0.0116167	-0.141826	0.647224	0.333974	0.160212	-0.651824	-0.159169	0.706868	0.479468	0.316978	-0.72484	1.57288	0.855491	0.104652	0.700124	0.895802	0.891731	0.136036	0.716198	0.115872	0.059	0.373	0.195	0.144	0.209	0.655	1.306	0.146	10.5019	low
GSM528320	Barretina	-0.347044	-0.101614	-0.2727	-0.205061	-0.158697	-0.1755	-0.443868	0.266525	0.349275	0.225092	-0.285662	-1.04348	-1.08811	0.111679	0.0753991	-0.158619	0.317716	-0.088162	-0.26336	-0.824929	-0.119515	-0.174033	-0.659492	-0.334843	-0.478326	-0.382611	-0.433671	-0.951527	-0.694963	0.691694	0.104652	0.625475	-0.352335	4.06414	-0.302455	-0.23651	-0.181488	0.351	-0.159	-0.044	-0.157	-0.055	0.192	-0.637	0.338	10.8317	low
GSM528321	Barretina	-0.436784	-0.213535	-0.248055	-0.0582131	0.0293271	0.0777411	-0.506224	-0.136613	0.191056	-0.141578	-0.0249233	0.818683	0.776918	-0.195856	0.419671	0.21902	0.132009	0.177046	-0.0684234	0.0258603	0.362516	-0.0203676	-0.0920847	0.20136	0.117324	1.01014	0.0073117	-0.0984135	-0.0482147	0.565229	0.178741	0.193649	-0.0147855	-7.67563	-0.0457414	-0.0307764	-0.338746	-0.247	0.377	-0.171	-0.241	-0.171	-0.27	0.67	0.464	11.3238	low
GSM528322	Barretina	-0.134507	0.0106336	-0.161267	0.0501056	0.0785309	-0.38276	-0.381411	-0.0250454	-0.167069	-0.318158	-0.210468	-0.0836637	0.448716	-0.119196	0.473199	0.107431	0.317363	-0.0226823	0.107688	0.311606	-0.0187736	-0.0484662	-0.00390662	-0.224505	0.0310108	0.341991	0.0339692	0.548253	-0.68943	0.876029	0.785534	0.895876	-0.228861	5.56018	0.00584553	0.067774	0.00190895	0.353	-0.132	-0.06	0.085	0.156	0.725	-0.021	0.617	11.8725	high
GSM528323	Barretina	-0.371935	-0.105208	-0.296362	0.00320411	-0.0671707	-0.0197977	-0.34947	-0.170749	-0.0258015	-0.0388248	-0.00133197	-0.447826	0.802966	-0.0440616	0.382876	-0.184871	0.153606	-0.125529	-0.35871	0.011863	-0.139211	-0.262431	-0.0307434	-0.0954538	-0.247772	1.39478	0.0106559	-0.136869	-0.715212	0.736973	0.546981	0.703702	-0.545807	-0.800286	-0.360676	-0.513535	-0.526388	0.392	-0.166	0.042	0.007	0.143	0.351	-0.57	0.244	12.1778	high
GSM528325	Barretina	-0.417399	-0.0800717	-0.374808	-0.0120503	-0.0978045	0.0759413	0.293367	-0.122581	-0.266234	-0.412337	-0.307467	-0.496556	0.646679	0.146277	0.278919	0.178996	0.46029	-0.289056	-0.0836548	-0.118981	-0.242605	-0.339535	-0.931694	0.074362	-0.257781	0.911793	-0.361971	-1.21465	-1.01382	0.961221	0.95063	0.739568	-0.10146	1.99131	-0.420922	-0.469601	-0.222281	0.463	0.011	-0.056	0.144	0.19	0.463	-0.112	-0.1	11.1898	low
GSM528326	Barretina	-0.368535	-0.133644	-0.26099	0.149179	-0.370455	-0.252919	-0.0968142	-0.210172	-0.059705	-0.0150576	-0.488276	-0.0875045	0.318476	0.0298907	0.281961	0.1762	0.316615	-0.339223	0.0922373	-0.055707	-0.200059	0.0481528	-0.993035	-0.00820991	-0.338325	0.577549	-0.338449	-2.00704	-0.965091	0.988842	0.978403	0.936043	-0.163895	1.61601	-0.148228	-0.300902	-0.0818341	0.339	-0.329	-0.074	-0.025	0.081	0.392	-0.442	0.089	11.5518	low
GSM528327	Barretina	-0.00692712	0.250221	-0.285721	0.776075	0.520443	-0.313939	-0.0787537	0.0311251	0.0559045	-0.119948	-0.218448	0.627633	-0.228529	0.229022	0.598079	0.557381	0.1459	-0.242875	-0.112493	0.218	-0.15962	0.470926	-0.893355	-0.156405	-0.0468311	0.0815716	-0.30748	-0.302837	-0.836452	0.952532	0.746898	0.957448	0.559771	5.51447	0.528626	0.877376	0.606981	0.124	-0.301	-0.224	-0.172	-0.121	0.54	-0.296	0.187	11.5647	low
GSM528328	Barretina	-0.555186	-0.263605	-0.323979	0.146951	-0.586065	0.188913	-0.204413	-0.0567295	-0.302969	0.215406	-0.434067	-0.590793	-0.806791	-0.0364701	-0.376507	-0.490459	-0.212689	-0.915059	-0.784782	-0.364	-0.043506	-0.70474	-1.28824	-0.113683	-0.153213	0.0091	-0.343029	-0.205685	-0.812039	0.619598	0.367772	0.576388	-0.917249	1.93132	-0.967565	-0.616448	-0.713851	0.578	-0.084	-0.085	0.007	0.17	-0.142	-0.366	0.408	12.8142	high
GSM528329	Barretina	-0.497625	-0.0622572	-0.483742	-0.258436	-0.707766	0.324231	-0.0802571	-0.525357	-0.0834043	0.702095	-0.571315	-0.670139	-1.42152	-0.091005	-0.760391	-0.610156	-0.0498425	-0.67583	0.00480828	-0.660363	-0.414128	-0.806531	-1.30741	-0.322097	-0.559991	-0.453146	-0.551447	-0.0144178	-0.650981	0.179009	0.607358	0.630918	-1.02242	4.92189	-0.986973	-1.1173	-0.93129	0.121	-0.09	0.051	-0.002	-0.015	-0.377	-0.407	0.027	10.587	low
GSM528330	Barretina	-0.404473	-0.0666536	-0.375354	0.400923	-0.808481	0.485353	0.020461	0.158921	-0.271335	0.297022	-0.3142	-0.479704	-0.640085	-0.486416	-0.44403	-0.517141	-0.204308	-0.202614	0.374819	-0.143333	-0.48315	-0.412305	-0.855017	-0.157074	-0.0545651	-0.284904	-0.418855	-1.73684	-1.15906	0.812645	0.752068	0.855198	-0.841521	4.80951	-0.636073	-0.432907	-0.767708	0.467	-0.371	0.226	-0.04	0.185	0.125	-0.472	-0.263	12.362	high
GSM528331	Barretina	-0.321318	0.0179384	-0.376951	0.698963	-0.0126044	0.148131	0.0391084	-0.0520832	-0.110023	-0.148481	-0.368035	-0.357496	-1.44236	-0.149273	-0.0408163	-0.219304	0.0638336	-0.630517	-0.180677	-0.614872	-0.475542	-0.745885	0.74369	-0.367629	-0.324825	-0.478647	-0.361076	-0.0306097	-0.742459	0.788822	0.159647	0.903214	-0.343876	2.39338	-0.55399	-0.117167	-0.0145893	0.447	-0.179	0.015	0.042	0.136	0.118	-0.177	0.572	13.7558	high
GSM528332	Barretina	-0.358111	-0.167297	-0.212016	-0.0603676	-0.555428	-0.366622	-0.216033	-0.5989	-0.0679236	-0.242306	-0.426802	-0.197705	1.81883	-0.0292259	-0.423895	-0.383183	0.239187	-0.2146	0.0554274	0.010906	-0.212923	0.473254	0.137945	-0.324578	-0.0570127	-0.151672	-0.306075	-0.6034	-0.71548	0.842122	0.473202	0.897238	-0.59317	5.11636	-0.262745	-0.259286	-0.153664	0.227	-0.358	-0.01	-0.019	0.001	0.109	-0.758	-0.086	10.5779	low
GSM528333	Barretina	-0.518893	-0.25075	-0.297937	-0.320304	-0.679886	-0.190915	0.441264	0.342116	0.151044	-0.364681	0.392281	0.745537	-1.41631	0.125753	0.171632	-0.13565	-0.19493	-0.555614	0.773932	-0.407977	0.329341	-0.725923	-0.939361	-0.223367	-0.103765	0.13557	-0.402008	-1.14684	-1.01227	0.208308	0.179734	0.923018	-0.920064	-3.41763	-0.37175	-0.726963	-0.861432	-0.119	-0.19	0.191	-0.02	-0.131	-0.658	-0.429	0.697	11.8944	high
GSM528334	Barretina	-0.56955	-0.206655	-0.403217	0.0774408	-0.551437	-0.133709	-0.0700213	0.101938	0.13397	-0.138587	-0.37327	-0.139761	0.683146	-0.219867	-0.0720586	-0.330568	0.142852	0.0506511	0.140544	-0.337672	-0.101715	-0.574932	0.0344317	-0.290484	-0.319836	-0.128075	-0.244591	-0.8058	-0.789399	0.858282	0.272562	0.963412	-0.667559	-0.715461	-0.463034	-0.647239	-0.709941	0.407	-0.308	-0.052	-0.153	-0.16	0.56	-0.418	0.683	12.2487	high
GSM528335	Barretina	0.016939	0.363341	-0.384891	0.275328	0.823158	0.0983139	0.343059	-0.146832	-0.202062	0.105501	0.0890692	-0.784137	-0.546313	0.441016	0.811782	1.09351	-0.0687376	-0.465056	-0.284291	-0.445793	0.0559184	0.774049	-1.17322	-0.0464403	-0.243147	0.49062	-0.370245	-1.04261	-0.465105	0.96745	0.459844	0.792865	1.44035	4.53471	0.895098	1.24792	1.11093	0.434	-0.12	-0.039	0.148	0.238	0.31	-0.32	0.137	12.8515	high
GSM528336	Barretina	-0.608174	-0.286514	-0.3574	0.00708035	-0.77626	0.132585	0.56029	-0.235404	-0.383133	-0.117367	-0.221253	-0.595742	1.20931	-0.0589738	0.0573579	-0.44013	-0.0366203	-0.302957	0.352067	-0.527551	-0.37078	-0.243461	-0.456299	-0.0130665	-0.571129	0.354218	-0.482786	-1.25411	-0.801341	0.981927	0.427238	0.975824	-0.899354	-0.84779	-0.630961	-0.847116	-0.91561	0.469	-0.186	0.032	0.028	0.019	0.079	-0.339	-0.19	11.3302	low
GSM528337	Barretina	-0.421766	-0.107086	-0.349644	0.165544	-0.276464	0.165287	-0.0923895	-0.288113	-0.394715	0.261719	-0.246328	-1.01649	0.433087	-0.194654	0.275085	-0.425087	-0.05534	-0.55574	-0.0853502	-0.771744	-0.380776	-0.293022	-0.191764	-0.150452	-0.213487	-0.271168	-0.473682	-0.579112	-0.660935	0.870543	0.27586	0.874093	-0.538445	0.210565	-0.461818	-0.234208	-0.429147	0.564	-0.127	0.061	0.113	0.207	0.033	-0.452	0.609	14.3664	high
GSM528338	Barretina	-0.665846	-0.194843	-0.523336	0.0710648	-0.290371	0.462951	-0.198444	0.276651	-0.13136	0.326405	-0.321389	-0.298298	-0.363978	0.00176465	1.0367	-0.377528	0.159659	-0.0301697	0.274814	-0.499608	-0.445902	-0.0639348	-0.847349	0.155888	-0.430802	0.0469807	-0.398818	-0.660072	-1.18988	0.891946	0.19081	0.917397	-0.447309	-0.759058	-0.246842	-0.640682	-0.487645	0.461	-0.109	0.143	0.056	0.041	-0.125	-0.371	0.15	12.5269	high
GSM528339	Barretina	-0.46078	-0.180486	-0.311438	-0.0322043	-0.708577	0.399634	0.0431843	-0.0851001	-0.39751	-0.530842	0.0302055	0.248291	0.334105	-0.103735	0.125558	-0.405444	0.349068	-0.137528	0.158971	-0.981945	-0.240652	-0.884178	-0.0422449	-0.156271	-0.69679	0.64749	-0.342948	-0.284621	-0.112745	0.41544	0.316393	0.979268	-0.771328	-3.07076	-0.660734	-0.807806	-0.746688	0.485	0.068	0.168	0.091	-0.003	-0.094	-0.48	-0.153	11.3096	low
GSM528340	Barretina	-0.559516	-0.115271	-0.493606	0.14086	-0.476321	0.313957	0.305022	-0.00733118	-0.104952	0.37415	-0.0291044	0.0835579	1.00614	-0.297829	0.0102478	-0.387111	0.427293	0.268117	0.581093	-0.469855	0.0719893	-0.0687655	-0.249272	0.121131	-0.607437	-0.0333967	-0.304251	-1.31787	-0.907672	0.959866	0.462499	0.995417	-0.75514	-0.028154	-0.28502	-0.452187	-0.674359	0.291	-0.493	-0.026	-0.111	-0.161	0.135	-0.462	0.185	13.3114	high
GSM528341	Barretina	-0.724366	-0.280399	-0.493297	-0.0249981	-0.410019	0.278775	-0.308953	-0.164422	-0.110098	0.294544	-0.29058	0.840071	-0.634875	-0.177155	0.287945	-0.511501	0.0278913	-0.446717	-0.0587	-0.824111	-0.212703	-0.622612	0.747524	-0.416439	-0.540314	-0.439471	-0.324877	-0.282597	-0.874575	0.838568	0.303804	0.77082	-0.912278	0.723178	-0.727887	-0.760267	-0.47103	0.457	-0.281	0.01	-0.101	0.055	-0.182	-0.169	0.692	14.025	high
GSM528342	Barretina	-0.267856	0.239895	-0.564167	-0.225757	0.827705	0.380645	0.333955	-0.0315247	0.310195	0.702958	-0.242549	-0.822633	-1.0829	0.319518	-0.170715	0.752135	-0.416964	0.0320592	0.23464	-0.722503	-0.341325	-0.123498	-1.16172	-0.386364	-0.288053	-0.626442	-0.341154	-1.08815	-0.948978	0.785297	0.276594	0.822769	2.80383	7.4464	1.57095	1.81753	1.15704	0.36	-0.162	0.085	0.113	0.309	0.156	-0.306	0.134	12.4728	high
GSM528343	Barretina	-0.341828	-0.082054	-0.288638	0.235896	0.0429597	-0.0256097	-0.00549487	-0.265444	-0.0981037	-0.0564083	-0.317602	-0.631349	-0.20769	-0.17507	0.572553	-0.221994	-0.167529	-0.541763	-0.250701	-0.199718	0.060968	0.125797	0.521328	-0.423063	-0.0825119	0.509586	-0.100899	-0.414157	-0.34743	0.813147	0.280081	0.670007	-0.0683531	4.22965	-0.197096	-0.258951	0.0059842	0.399	-0.24	-0.032	0.062	0.255	0.308	-0.296	0.227	12.7626	high
GSM528344	Barretina	-0.311584	-0.0723671	-0.265797	0.210011	-0.459715	-0.525523	-0.487797	0.0748913	0.159307	0.0608888	-0.437101	1.31133	0.27159	-0.0388804	-0.273986	-0.188311	0.18922	0.340558	0.31668	-0.608493	-0.108743	0.172474	0.168616	-0.121608	-0.529562	-0.187447	-0.260573	-1.78946	-1.07178	0.846448	0.275633	0.924364	-0.478479	0.910091	-0.154924	-0.701876	-0.581991	0.207	-0.683	-0.255	-0.316	-0.261	0.24	-0.865	-0.251	12.1392	high
GSM528345	Barretina	-0.454124	-0.0804428	-0.415202	-0.0175907	0.0155297	0.442884	-0.0183776	0.0277187	-0.135214	0.0387421	-0.526623	-0.869903	0.474763	0.0558627	0.377692	0.120769	0.259465	-0.238668	0.254727	-0.0466693	-0.138755	-0.228827	0.256794	-0.419948	-0.317525	0.137758	-0.280772	-0.589232	-0.778998	0.859148	0.16681	0.538658	0.294776	0.827235	-0.0241046	-0.0642956	-0.398894	0.519	-0.235	-0.088	-0.086	0.036	0.433	-0.552	0.403	12.6312	high
GSM528346	Barretina	-0.418713	-0.257766	-0.17883	0.0656132	-0.497498	-0.00368518	-0.176365	-0.208896	-0.247813	0.546686	-0.213331	-0.745295	-0.0618224	-0.0283197	0.54905	-0.435425	0.169404	-0.335787	-0.75497	-0.242501	0.0739066	0.00318991	-1.15022	-0.141259	0.12523	-0.0144931	-0.131298	-0.464757	-0.639072	0.586628	0.288709	0.263991	-0.601474	4.23884	-0.466207	-0.432613	-0.306709	0.582	-0.225	0.041	0.046	0.158	0.712	-0.228	0.788	11.4346	low
GSM528347	Barretina	-0.419298	-0.131884	-0.319349	0.230827	-0.433148	-0.255306	-0.0682653	0.0557053	-0.207191	-0.26976	-0.160017	-0.347417	0.912367	0.0160201	0.764644	0.0274606	0.640492	-0.171346	-0.0232054	0.242759	0.0753081	-0.114953	-0.486969	-0.0364918	-0.226737	0.498971	-0.158294	-1.5648	-0.934062	0.945471	0.182072	0.914826	-0.27258	1.3131	0.0493152	-0.197772	-0.0706497	0.48	-0.266	-0.172	-0.186	0.082	0.599	-0.403	-0.107	12.0979	high
GSM528348	Barretina	-0.498456	-0.272679	-0.250864	-0.180789	-0.61635	0.121904	-0.374763	-0.14258	-0.0902542	0.571514	-0.200281	-0.67226	-0.129547	-0.318413	-0.257215	-0.521084	0.526994	0.480801	-0.283883	-0.573121	0.0138242	-0.0409187	-1.4991	0.0664632	0.0184987	-0.623283	0.277014	-0.717756	0.063046	0.0560298	0.49271	0.0617974	-1.00831	1.66953	-0.358958	-0.928262	-0.724108	-0.124	0.068	0.113	-0.045	-0.006	-0.157	-0.187	0.099	9.96995	low
GSM528349	Barretina	-0.164636	-0.0131688	-0.168297	0.0709841	-0.122458	0.0112908	-0.239296	0.313832	0.136211	0.303125	0.126333	0.660246	0.0996743	-0.136172	0.113683	0.0733865	0.190224	1.22442	0.0916173	-0.453686	0.168731	-0.0195064	-1.70996	-0.294512	0.156383	-0.404993	0.217338	-1.90179	0.223988	0.198403	0.295785	0.299605	0.032054	-0.355754	0.474676	0.559647	0.396823	-0.148	-0.26	-0.063	-0.142	0.044	0.283	-0.843	-0.233	10.927	low
GSM528350	Barretina	0.00708446	-0.124656	0.146379	-0.0359711	-0.215844	-0.309879	-0.428883	0.191383	0.164898	-0.303535	0.0407897	0.83321	0.250752	0.103404	0.240412	0.034825	0.150161	0.808386	0.475116	0.43226	0.14171	0.124967	2.46125	0.163879	0.30073	0.016502	0.854659	0.631237	0.0957681	0.654903	0.998087	0.764828	0.868089	-3.13053	0.325014	-0.120254	-0.0497265	-0.201	-0.359	0.101	0.197	-0.113	-0.298	-0.549	0.201	10.8485	low
GSM528351	Barretina	-0.356027	-0.0871863	-0.298712	-0.24713	-0.414273	-0.0451415	0.0347638	-0.208142	-0.186042	-0.0239695	-0.103909	-0.0790028	-0.494217	-0.027973	-0.186983	-0.413973	-0.0296258	0.333088	-0.125632	-0.105521	-0.117394	-0.0396709	-0.452465	-0.109254	-0.283636	0.114881	0.0697015	-0.617568	0.418424	0.702658	0.977842	0.269664	-0.64638	-1.03433	-0.229122	-0.737276	-0.74705	-0.148	-0.001	-0.06	0.055	-0.004	-0.616	0.121	0.169	10.5818	low
GSM528352	Barretina	-0.36904	-0.169567	-0.221637	-0.330321	-0.416745	-0.154923	-0.258224	-0.00959606	0.422434	0.42773	-0.150335	-0.318875	0.933206	0.229892	0.117784	-0.295697	0.0899167	0.515809	0.21721	-0.228899	-0.304132	-0.392416	0.421649	-0.0732243	-0.0470393	0.0764191	0.046422	0.463245	0.385164	0.114971	0.51492	0.0853089	-0.191315	5.54118	-0.0399669	-0.258963	-0.169351	-0.129	-0.352	0.235	0.205	0.282	-0.172	-0.828	0.038	10.5921	low
GSM528353	Barretina	-0.380946	-0.070147	-0.345332	-0.253656	-0.254478	-0.267997	-0.349233	-0.0342606	0.0225041	0.32319	-0.13678	-0.41652	-0.864096	-0.284865	-0.202249	-0.201545	-0.0381247	0.460231	-0.448419	-0.539088	-0.1631	0.447726	-1.61412	-0.244826	-0.0607205	-0.353086	-0.0133985	-1.97769	-0.182702	0.107656	0.572725	0.415523	-0.18354	10.4853	0.123487	-0.247927	-0.279902	-0.165	-0.384	0.059	-0.108	-0.019	0.101	-0.809	-0.131	11.3457	low
GSM528354	Barretina	0.324554	0.474929	-0.167083	1.16274	1.12952	0.373033	0.475757	0.532911	0.323662	-0.0142595	0.438206	0.61343	0.709194	0.301174	-0.203507	1.26164	0.0802494	0.528665	0.185116	0.387522	0.250155	1.81723	1.49895	-0.301332	0.139344	-0.263531	0.293532	1.5137	-0.0221081	0.523125	0.104652	0.924138	1.08626	4.38003	1.55799	1.98181	1.75302	-0.131	0.015	0.062	0.034	0.023	0.694	0.36	0.185	11.6548	low
GSM528355	Barretina	-0.0957122	0.186573	-0.31365	0.216253	0.809803	0.0952551	-0.319944	0.0359326	0.266546	0.637595	0.0973803	0.26741	-0.624456	-0.14643	0.724078	0.0795102	0.0723836	0.650791	0.00685603	0.648882	0.107863	0.873781	-0.682495	0.0690258	-0.0197973	-0.0398015	0.150087	-0.0670416	0.817931	0.439641	0.104652	0.0754126	1.37911	4.89841	1.01259	0.994233	0.968453	-0.213	-0.057	0.023	-0.122	0.089	0.002	0.471	-0.256	11.4294	low
GSM528356	Barretina	-0.241567	0.0267143	-0.298091	0.142585	0.214163	-0.186364	-0.211344	0.0211743	-0.0230062	0.331614	0.31972	0.171079	1.24057	-0.0490148	0.193487	-0.0554948	0.325317	0.584959	0.296103	0.228638	-0.0434249	0.285256	-0.59815	0.0667734	-0.0686001	-0.0788607	0.199875	-1.61337	-0.191068	0.562544	0.618295	0.224794	0.0189892	-1.09728	0.46067	0.360146	-0.13171	-0.352	-0.081	-0.162	-0.216	-0.22	0.487	0.423	-0.405	10.3706	low
GSM528357	Barretina	-0.296443	-0.041203	-0.2836	-0.0633982	0.100427	-0.330605	-0.349378	-0.0293731	0.136061	0.306213	-0.179704	-0.342774	1.40207	-0.195477	0.856807	0.115566	0.203828	0.95636	0.78465	0.69056	0.0823282	0.654096	-0.00774045	0.0499443	0.0862423	0.280509	0.148196	0.618081	-0.0833567	0.101547	0.184313	0.198234	0.600775	2.91416	0.753473	0.42381	0.369492	-0.176	-0.291	0.106	-0.057	0.037	0.223	-0.613	0.093	11.7772	high
GSM528358	Barretina	-0.308236	-0.232047	-0.084654	-0.245265	-0.24627	-0.00829202	0.129286	-0.213874	0.195315	0.330573	0.0298127	-0.69247	-0.478588	-0.256311	-0.115364	-0.0865653	0.0128822	-0.123893	-0.221386	0.605309	0.0467629	-0.0960101	1.66764	-0.230494	0.643516	-0.237098	0.552502	0.546229	0.733091	0.504068	0.337557	0.433362	-0.0626445	-0.914142	-0.066219	0.0358991	0.257834	0.034	0.275	0.146	0.287	0.191	0.738	0.642	0.512	9.88364	low
GSM528359	Barretina	-0.336689	0.0156181	-0.391453	-0.221581	0.19808	0.325497	-0.146979	-0.0443703	-0.0599891	-0.173575	-0.0989085	-0.902963	1.53231	-0.195353	-0.153121	-0.0393834	0.0965331	-0.283488	0.309079	-0.150597	0.180048	0.0845829	1.05806	-0.0992344	0.0366921	0.324482	-0.293634	-0.202649	0.414256	0.702699	0.104652	0.724824	0.122145	-2.57437	0.609001	0.403084	0.2358	-0.073	0.414	0.092	-0.017	0.138	0.579	1.224	0.405	11.1061	low
GSM528360	Barretina	-0.38596	-0.187488	-0.220524	-0.212374	-0.359663	0.220007	0.075938	0.360099	-0.0254083	-0.221145	-0.0106938	0.975097	-0.0253554	-0.126257	0.4891	0.137765	0.0742863	0.0933865	0.394447	-0.461879	-0.06742	-0.380841	-0.402625	-0.266978	0.150663	-0.258193	-0.181471	-0.873603	0.671105	0.616507	0.818469	0.918917	-0.216458	-2.03562	0.0342058	-0.285178	-0.501111	-0.127	0.01	0.112	-0.026	-0.069	0.14	-0.113	0.082	11.6484	low
GSM528361	Barretina	-0.444313	-0.342469	-0.113159	-0.270075	-0.642935	0.0703472	-0.215404	-0.0899062	-0.167578	-0.00365727	0.00105292	-0.815243	0.927996	-0.461157	-0.785409	-0.48806	-0.0243986	0.0110369	-0.117148	-0.405332	0.034137	-0.351568	-0.448631	-0.00602007	0.523757	-0.505852	0.184292	0.120178	0.708037	0.329554	0.627209	0.625709	-0.44771	-0.723414	-0.239366	-0.608506	-0.605034	-0.09	0.14	0.135	0.108	-0.084	0.134	-0.358	0.413	12.59	high
GSM528362	Barretina	-0.409799	-0.203344	-0.229394	-0.319553	-0.474912	-0.0683416	0.480401	0.294363	-0.171104	0.0528315	0.173404	-0.56169	-0.436912	0.309277	-0.650962	-0.0882585	-0.17309	-0.0565915	-0.440151	0.168432	0.456969	0.480401	0.0344317	-0.195295	-0.107688	-0.277285	0.197057	0.500689	1.70755	0.482607	0.12516	0.481883	-0.678122	-0.83608	-0.384989	-0.53143	-0.630355	-0.023	0.093	0.19	0.044	0.231	0.509	1.236	-0.261	9.997	low
GSM528363	Barretina	0.162703	0.39424	-0.257264	1.14825	0.84184	0.098083	0.140189	0.157775	0.340908	-0.0659923	0.353645	0.0589896	-1.22877	-0.090457	0.617859	0.443304	0.0376449	0.242442	-0.329235	0.673179	0.137023	-0.0573877	-0.452465	-0.235625	0.379793	-0.225654	-0.110014	0.0402301	0.243799	0.632635	0.104652	0.662667	1.17371	1.77856	0.571505	0.823505	0.646336	-0.212	0.14	-0.012	-0.017	-0.141	0.125	-0.032	0.056	10.3963	low
GSM528364	Barretina	-0.405069	-0.289637	-0.128258	0.065735	-0.477831	-0.339248	-0.0420395	0.339496	0.0597067	0.102879	0.315313	1.46102	-0.067032	-0.155904	-0.0583015	-0.297618	-0.00446702	0.709633	0.369164	0.33339	0.236053	0.049861	1.17691	-0.00454229	0.509085	-0.261579	0.0449041	-0.173301	0.25325	0.549803	0.104652	0.770593	-0.806759	-8.54908	0.0229981	-0.601811	-0.0146123	-0.095	0.027	0.139	-0.087	-0.059	0.927	0.531	0.036	11.0082	low
GSM528365	Barretina	-0.447846	-0.169936	-0.308789	-0.203128	-0.448503	0.341579	-0.162214	-0.0233286	-0.262926	0.383477	0.232119	0.256571	-0.447331	-0.0794133	-0.167283	-0.410254	0.0279295	0.0142628	-0.132987	-0.452475	0.094078	-0.0197707	-0.962364	-0.381397	-0.0853872	0.47378	-0.220187	-0.312957	-0.20557	0.101974	0.220599	0.703747	-0.719684	0.190648	-0.410547	-0.414406	-0.377212	-0.027	0.144	0.179	-0.018	0.131	-0.457	0.38	0.305	11.7733	high
GSM528366	Barretina	-0.355619	-0.0982553	-0.285959	-0.0633706	-0.19256	0.0706078	0.37301	0.46074	-0.190415	0.25016	-0.306781	-0.952434	-1.44757	-0.206775	-0.585827	-0.173507	-0.230825	-0.267312	-0.498945	-0.452165	-0.0396651	-0.297349	-0.36812	-0.169263	0.334885	0.0817276	-0.113077	0.791132	0.449073	0.498027	0.104652	0.64537	-0.117325	-0.0253614	-0.324314	-0.0202767	0.136309	0.08	0.117	0.166	0.192	0.169	0.058	0.384	0.245	12.4419	high
GSM528367	Barretina	-0.789077	-0.363653	-0.472693	-0.376863	-0.585568	0.24322	0.569481	0.244362	-0.292046	0.266953	0.115472	-0.4975	-1.41631	-0.0616473	-0.558375	-0.609241	-0.457329	-0.645672	0.374569	-1.0002	-0.210247	-0.877705	-2.12401	-0.272723	-0.0616826	-0.560197	-0.587165	-1.3796	-0.645714	0.340635	0.878717	0.627758	-1.16484	-2.55962	-1.13068	-1.21543	-0.92921	-0.095	0.112	0.25	0.102	0.135	0.256	-0.087	0.501	11.8236	high
GSM528368	Barretina	-0.411453	-0.0754241	-0.373365	-0.167796	-0.258262	0.3016	0.0909192	-0.0917572	-0.11031	0.653756	-0.127199	0.422126	-0.431702	-0.113917	-0.06014	-0.529527	0.100304	-0.229079	0.0346137	-0.0521737	0.0205139	0.0217275	0.0305978	-0.144927	0.372228	-0.350411	-0.235637	0.743568	0.840907	0.515641	0.17097	0.649286	-0.928007	-1.95472	-0.505925	-0.617375	-0.107945	0.067	0.254	0.193	-0.005	0.125	-0.06	0.824	-0.071	11.0005	low
GSM528369	Barretina	-0.530912	-0.307243	-0.248522	-0.255656	-0.696114	0.419789	0.25483	-0.0872275	-0.00859502	0.621746	-0.206397	-1.14557	-0.442121	-0.133338	-0.777909	-0.702482	-0.214946	-1.16825	-0.215402	0.0381488	-0.170641	-0.282589	-2.032	-0.353829	-0.00589021	-0.0301679	-0.178249	-0.362545	0.26092	0.229377	0.214297	0.335119	-0.860204	1.3844	-0.826654	-0.887065	-0.619705	0.111	0.313	0.2	0.251	0.026	-0.044	1.179	-0.335	10.8742	low
GSM528370	Barretina	0.500811	0.347216	0.170661	0.642032	1.2424	0.188581	0.256772	0.574367	0.323953	0.261041	0.117073	0.0917756	-0.525474	0.12247	0.346234	0.964259	-0.0895638	0.114614	0.310789	1.66019	0.531942	2.20051	2.39607	-0.275076	1.2495	0.00524182	0.256493	0.562421	0.260288	0.812911	0.187162	0.901726	1.27748	2.35503	1.0022	1.44845	1.42818	-0.015	0.307	0.072	0.061	0.218	0.758	0.763	0.152	11.3212	low
GSM528371	Barretina	0.303373	0.63528	-0.368786	1.19256	2.13935	0.642148	0.793719	0.183733	0.269934	0.015897	0.286373	-0.191004	0.183027	0.352095	0.218153	1.05555	-0.133284	-0.142435	0.861166	0.57351	0.0664974	1.93167	2.9098	-0.198184	0.0805376	0.265979	-0.0676608	0.137382	0.367776	0.390823	0.197948	0.573601	1.37323	6.02084	1.85077	1.79914	2.52072	-0.124	-0.034	0.038	0.127	0.353	0.544	0.171	-0.148	10.0395	low
GSM528372	Barretina	-0.443578	-0.312958	-0.145134	-0.191647	-0.720324	0.196043	-0.0111025	0.0830588	0.12642	-0.276254	0.277097	-0.92716	-0.848468	-0.0389675	-0.488476	-0.393003	-0.0616606	0.200646	-0.297556	-0.960347	0.195132	-1.13376	-1.32274	-0.152932	0.333007	-0.369183	0.0963123	-0.386833	0.420423	0.187919	0.436049	0.792094	-0.156968	0.528057	-0.618585	-0.56626	-0.518536	-0.023	0.281	0.308	0.075	0.046	-0.298	-0.318	0.845	12.5166	high
GSM528373	Barretina	-0.144823	0.11329	-0.286793	-0.299196	0.349825	0.721175	0.410692	-0.121264	0.00968316	0.556987	0.112124	-0.346705	-0.681761	0.272641	0.276109	0.640935	-0.231739	-0.654795	-0.0191231	0.30711	-0.0572414	0.812825	-0.962364	-0.264438	0.43257	-0.229818	0.276868	-0.453625	1.29522	0.737012	0.25734	0.368205	1.74697	3.79937	0.986235	1.68588	0.788808	0.11	0.376	0.202	0.148	0.176	0.213	1.026	-0.141	11.499	low
GSM528374	Barretina	-0.538586	-0.216236	-0.358166	-0.431659	-0.790343	0.591639	0.105285	-0.0938221	-0.275156	0.339276	0.173639	0.18596	0.599793	-0.0514454	-1.31256	-0.32209	0.217609	-0.0986444	-0.0764827	-0.386308	-0.0131529	-0.389881	-0.69783	-0.00553548	-0.20795	-0.643602	-0.0523042	-0.842232	-0.214107	0.0868025	0.248603	0.383192	-0.900142	-3.03942	-0.394234	-0.894256	-0.619654	0.019	0.147	0.202	0.215	0.081	-0.358	0.272	0.067	11.8532	high
GSM528375	Barretina	-0.49975	-0.229023	-0.300808	-0.399509	-0.734931	0.0719679	0.123502	0.338662	-0.249981	0.121146	-0.0612903	0.462065	-0.2129	0.18409	-0.42226	-0.0346504	-0.154843	-0.298768	0.0576778	-0.182309	-0.210874	-0.13111	0.943049	-0.0339662	-0.243494	0.0361294	-0.122787	0.300313	1.52948	0.566665	0.104652	0.773677	-0.74396	-4.91531	-0.622392	-0.822017	-0.67959	0.032	0.169	0.179	0.087	0.046	-0.158	0.881	0.14	10.708	low
GSM528376	Barretina	-0.661893	-0.299004	-0.40321	-0.480199	-0.727817	0.501811	0.263295	-0.159529	-0.0829524	0.407525	-0.0655402	0.0924987	0.240333	-0.294094	-0.32124	-0.586799	0.200729	-0.26232	-0.249716	-0.110373	-0.587293	-0.596583	-0.398791	-0.364003	-0.187901	-0.554313	-0.382484	-1.31888	-0.78023	0.241786	0.104652	0.430346	-0.240983	2.97649	-0.248539	-0.854881	-0.735103	0.011	0.077	0.326	-0.05	-0.01	-0.073	0.152	-0.313	12.2409	high
GSM528377	Barretina	-0.223455	-0.18655	-0.0410047	-0.14282	-0.42521	-0.3567	-0.434665	-0.3217	-0.0144458	0.0198296	-0.218132	0.713282	0.14656	-0.450471	0.393248	-0.480333	0.165989	0.521687	0.210012	-0.401133	-0.070275	-0.348228	-0.437129	-0.289393	0.236521	-0.238358	-0.0149206	0.368117	0.220344	0.192906	0.104652	0.114848	-0.516743	0.762045	0.00047626	-0.352534	-0.254607	-0.109	-0.267	0.061	-0.083	0.015	0.032	-0.504	0.437	10.7287	low
GSM528378	Barretina	-0.175211	-0.225065	0.055393	-0.0903166	-0.539028	0.0869643	-0.510497	-0.277004	-0.066988	0.093377	-0.0666359	0.457352	1.18847	0.054763	-0.373731	-0.524856	-0.0532337	0.500073	0.610963	0.397084	0.0645173	0.154583	0.801198	0.218582	0.314787	0.169741	0.333443	0.214294	0.107435	0.274021	0.333745	0.0512104	-0.283937	0.490824	0.0921901	-0.425456	0.0620681	-0.216	-0.049	-0.022	0.083	-0.074	0.067	-0.029	0.034	10.4388	low
GSM528379	Barretina	0.0914831	0.199235	-0.119724	0.178352	1.01202	0.271899	-0.192613	0.325877	0.360071	0.577672	-0.0820596	-0.327065	-0.759905	-0.0507204	0.076661	0.869891	-0.375996	0.795857	-0.481222	1.04162	0.119847	0.820805	-0.605818	0.0807805	0.526053	-0.196821	0.164067	-1.17518	0.583879	0.243557	0.104652	0.0210741	1.83665	4.51347	1.47744	1.6516	1.7648	-0.26	0.03	0.043	0.108	0.189	0.745	-0.191	-0.179	9.44825	low
GSM528380	Barretina	-0.376854	-0.264086	-0.125298	-0.0290863	-0.684871	-0.709413	-0.491147	-0.0354338	0.035782	0.0916092	-0.0951066	-0.507892	1.14159	-0.116366	-0.810495	-0.281697	0.434543	0.425749	0.416411	-0.354087	0.140818	-0.296484	-0.0959185	-0.2601	0.0807	-0.316577	0.0721813	-0.903963	0.168247	0.0206799	0.466295	0.175375	-0.86333	0.347471	-0.283902	-0.587205	-0.583273	0.023	-0.078	0.009	-0.086	0.035	0.142	-0.917	0.259	12.9211	high
GSM528381	Barretina	-0.185138	-0.205498	0.0226223	-0.209355	-0.378977	-0.061362	-0.586809	-0.139325	0.00451493	-0.0807989	-0.208422	-0.265835	2.03763	-0.304983	-0.016423	-0.172388	-0.0165801	0.0160789	0.218108	0.645183	0.232677	0.110349	0.678515	0.106209	0.720371	-0.271004	0.509495	-0.52244	0.785399	0.170558	0.568241	0.105565	-0.43198	4.59598	0.13211	0.00122923	1.10194	-0.202	-0.303	-0.031	0.095	0.069	0.289	-0.601	-0.317	10.6256	low
GSM528382	Barretina	-0.227995	-0.0553911	-0.191783	-0.163117	-0.223885	0.150645	0.215718	-0.355867	-0.226581	-0.195644	-0.0105875	-0.897821	1.18327	-0.224877	-0.921126	-0.632156	0.0119783	0.146519	0.183039	0.260506	-0.278526	-0.318344	0.517494	0.270755	-0.398839	-0.0718213	-0.172283	0.753688	-0.828146	0.0825042	0.453323	0.0270225	-0.900799	2.01593	-0.419319	-0.570686	-0.113011	-0.032	-0.335	-0.164	-0.071	0.118	-0.494	-0.879	-0.793	12.2242	high
GSM528383	Barretina	-0.423711	-0.11002	-0.348545	-0.0178808	-0.261499	0.0244835	0.0322012	-0.224865	-0.212159	-0.0495506	-0.021711	-0.236797	-1.23398	0.0588191	-0.711503	-0.52142	-0.121905	0.396954	0.248242	0.135945	-0.295633	-0.0831693	-1.12722	0.220937	-0.543459	-0.0183909	-0.335197	1.12509	-0.541778	0.169101	0.40969	0.117047	-0.709396	-0.928766	-0.578264	-0.674124	-0.47059	0.043	-0.15	-0.15	-0.093	0.014	-0.485	-0.826	-0.46	11.9395	high
GSM528384	Barretina	-0.35327	-0.0837425	-0.299475	-0.0557197	-0.261789	0.0177703	0.62345	-0.181028	-0.246529	-0.412978	-0.171296	0.261649	-0.124337	-0.00264149	-0.47412	-0.674325	-0.147253	-0.168377	0.192124	-0.126442	-0.24797	-0.21065	-0.371954	0.0603894	-0.613054	0.00207351	-0.433441	-0.267417	-0.987387	0.229233	0.654821	0.153369	-0.557964	-2.58857	-0.438444	-0.495596	-0.729228	-0.143	-0.348	-0.184	-0.222	-0.129	-0.774	-0.704	-0.953	11.8339	high
GSM528385	Barretina	-0.270412	-0.0832805	-0.207924	0.116296	-0.196206	0.139515	0.592477	-0.218813	-0.328572	-0.243826	-0.203179	-0.282276	0.282009	0.0165961	-0.345115	-0.430762	-0.21317	-0.291092	0.125063	-0.00362888	-0.367647	-0.120663	0.440818	0.304817	-0.513812	0.359307	-0.340967	1.07449	-0.793381	0.417002	0.821676	0.154642	-0.53658	-1.94196	-0.387153	-0.361619	-0.437799	-0.007	-0.111	-0.197	-0.161	-0.056	-0.838	-0.954	-0.902	12.3079	high
GSM528386	Barretina	-0.425671	-0.204384	-0.245874	-0.177618	-0.345792	0.145924	0.416948	-0.185979	-0.296986	-0.16506	-0.193277	-0.495712	-0.587989	-0.0308956	-0.601321	-0.635397	-0.284058	-0.264605	-0.245213	-0.0524329	-0.200227	-0.490363	-0.594316	0.208563	-0.467061	-0.247796	-0.525626	1.12003	-0.977102	0.165215	0.578824	0.218188	-0.814116	-2.89803	-0.704522	-0.385117	-0.650455	0.103	-0.064	-0.138	-0.114	-0.04	-0.805	-0.528	-0.287	12.6325	high
GSM528387	Barretina	-0.485385	-0.215323	-0.300069	-0.229914	-0.11717	-0.146382	0.124466	-0.27323	-0.125115	-0.320259	-0.100897	-0.761909	1.475	-0.35689	-0.326061	-0.545436	-0.0168137	-0.100087	0.0313371	0.032428	-0.102695	-0.121619	1.17308	0.213547	-0.298479	-0.119851	-0.15271	1.37505	-0.170399	0.314742	0.708364	0.549428	-0.70086	-0.197456	-0.351937	-0.200451	-0.56607	-0.039	-0.112	-0.12	-0.234	-0.135	-0.591	-0.219	0.161	12.3672	high
GSM528388	Barretina	-0.326054	-0.0872808	-0.265303	-0.207433	-0.185595	0.199724	0.102412	-0.25681	-0.127812	-0.407871	0.13239	0.220016	2.11057	-0.0282831	-1.20656	-0.502657	0.0284162	-0.274744	0.628322	-0.149126	-0.170661	-0.479038	1.11557	0.287173	-0.62369	0.110828	-0.339087	1.80515	-0.975976	0.321862	0.586358	0.527035	-0.573407	-1.60458	-0.454413	-0.590014	-0.610446	0.037	-0.197	-0.1	-0.042	-0.04	-0.621	-0.836	-0.511	11.9305	high
GSM528389	Barretina	-0.288116	0.117717	-0.450925	0.160928	0.187611	0.344471	0.234712	0.205315	-0.120815	-0.345088	0.304294	-0.240997	0.282009	0.0500755	0.146258	0.0483517	0.0355075	-0.565016	-0.0142489	-0.0770011	-0.299465	-0.0742728	0.866373	0.118081	-0.676928	0.199826	-0.456986	2.01464	-0.18955	0.341398	0.739151	0.259136	0.053527	-1.6003	-0.152724	-0.316925	-0.0833754	0.047	0	-0.087	-0.06	-0.051	-0.535	-0.474	-0.311	12.2165	high
GSM528390	Barretina	-0.315097	-0.0416821	-0.303795	-0.11194	-0.108333	-0.168862	-0.0620321	-0.117061	-0.0309119	-0.0903377	0.0104929	0.0684669	1.15201	-0.0422152	-0.211339	-0.184014	-0.073367	0.651468	0.347048	0.057062	-0.20936	-0.196122	-0.0614141	0.33552	-0.323199	0.318095	-0.120896	0.649452	-0.624639	0.316268	0.51965	0.458241	-0.428432	-2.19357	0.000929381	-0.506606	-0.36725	-0.138	-0.263	-0.231	-0.163	-0.169	-0.54	-0.744	-0.254	11.7115	high
GSM528391	Barretina	-0.245694	-0.0191716	-0.251692	-0.0397233	-0.213912	-0.0745404	0.0906753	-0.34035	-0.00244352	-0.417765	-0.0895949	0.678274	0.568536	-0.215191	-0.471243	-0.45397	0.103687	0.241417	0.38673	0.302434	-0.0989803	-0.25744	0.3028	0.39415	-0.61873	0.930426	-0.310007	0.0442781	-0.727934	0.244096	0.576808	0.116975	-0.621686	-2.4706	-0.438647	-0.624423	-0.588332	-0.137	-0.44	-0.307	-0.333	-0.213	-0.586	-0.979	-0.806	11.7411	high
GSM528392	Barretina	-0.397609	-0.0948879	-0.336356	-0.136632	-0.480266	0.205512	0.217508	-0.16528	-0.216531	-0.384826	0.161652	-0.650088	1.68338	-0.285403	-0.331406	-0.573244	-0.254347	-0.210385	-0.268764	-0.190733	-0.265874	-0.811862	0.0842715	0.33839	-0.516129	0.000280307	-0.45224	1.83147	-0.0949608	0.209958	0.785304	0.298443	-0.616962	-2.7632	-0.571657	-0.593046	-0.792232	0.066	-0.045	-0.105	-0.053	-0.079	-0.777	-0.552	-0.406	12.0438	high
GSM528393	Barretina	-0.409863	-0.159975	-0.277653	-0.0323482	-0.474918	-0.039787	0.092679	-0.0572827	-0.189225	-0.0208618	-0.0476447	0.251065	1.58961	-0.102477	-0.00444236	-0.694672	-0.0173143	0.491038	0.0813502	0.0208895	-0.283558	0.195927	0.682349	0.114161	-0.454425	-0.402848	-0.156821	0.691956	0.108756	0.0206506	0.542809	0.140159	-0.782468	-0.129845	-0.149429	-0.691358	-0.436671	-0.082	-0.189	-0.085	-0.134	-0.121	-0.652	-0.887	-0.521	11.6896	high
GSM528394	Barretina	-0.250764	-0.071178	-0.19954	0.14857	0.047794	0.0167279	0.0180726	-0.014103	-0.168421	-0.4794	-0.0634504	-0.269999	-0.598408	0.0360302	0.184538	-0.105563	0.197274	0.268819	0.420472	-0.0823728	-0.118001	0.285017	0.0420993	0.394194	-0.534404	0.49361	-0.200225	0.14143	-0.811621	0.291619	0.628447	0.334979	-0.55199	-1.82451	-0.10671	-0.40614	-0.378464	-0.103	-0.297	-0.192	-0.27	-0.11	-0.551	-0.799	-0.712	12.0838	high
GSM528395	Barretina	-0.390158	-0.0441937	-0.384405	-0.220431	-0.454912	0.0786384	0.0417472	-0.0542904	-0.409797	-0.361928	-0.145649	-0.358284	0.297638	0.202158	-0.452261	-0.709888	-0.14144	-0.0855198	0.0246792	-0.266232	-0.224381	-0.82291	-1.01604	0.201839	-0.845166	0.518548	-0.572275	0.302337	-0.877188	0.259566	0.548051	0.491153	-0.842294	-0.621347	-0.723573	-0.905082	-0.869896	-0.174	-0.237	-0.209	-0.181	-0.142	-0.865	-0.944	-0.758	11.0391	low
GSM528396	Barretina	-0.212044	-0.0761171	-0.15103	-0.0210374	-0.164051	-0.497909	-0.345338	-0.284583	0.0581175	-0.558521	-0.113629	-0.273602	3.94434	-0.215606	0.0276037	-0.208938	0.367848	0.809424	0.890593	0.738229	0.0669992	0.68385	1.18075	0.259862	-0.523105	-0.165491	0.0890756	0.421753	-0.673098	0.369777	0.998569	0.674309	-0.477758	-5.34911	0.197253	-0.483474	-0.334226	-0.192	-0.42	-0.231	-0.291	-0.281	-0.139	-0.784	-0.184	11.9859	high
GSM528397	Barretina	-0.457392	-0.199238	-0.286838	-0.359592	-0.763864	0.0847475	0.955514	-0.0490998	-0.333458	-0.387611	-0.0588018	-1.17094	1.02698	-0.0871273	-0.908304	-0.620863	-0.0928639	-0.322216	0.367047	-0.268949	-0.316925	-0.402372	0.632509	0.442899	-0.407257	-0.0620752	-0.510328	1.39833	-0.627887	0.141839	0.413268	0.776537	-0.779804	-0.256765	-0.431776	-0.857744	-0.556897	0.066	-0.1	0.042	-0.084	0.025	-0.747	-0.681	-0.421	12.5887	high
GSM528398	Barretina	-0.396208	-0.0894473	-0.340845	-0.119717	-0.483526	0.576501	0.4216	-0.0513604	-0.193179	-0.171273	-0.0209636	-0.566386	1.80841	-0.108403	0.309229	-0.611426	0.114243	0.0206052	0.305229	0.175949	-0.292766	0.533349	0.130277	0.73046	-0.695666	-0.590118	-0.631972	0.895368	-0.637165	0.152899	0.359992	0.642894	-0.7956	0.314367	-0.138376	-0.885458	-0.390283	-0.025	-0.04	0.185	-0.07	0.129	-0.559	-0.833	-0.376	12.6609	high
GSM528399	Barretina	-0.516866	-0.22844	-0.320473	-0.0313112	-0.298014	0.273556	0.168852	-0.174994	-0.332999	-0.114297	0.0291038	0.270834	1.48542	0.0854723	-0.375812	-0.520483	0.245033	-0.0590697	0.856836	-0.156161	-0.408009	-0.298631	-7.27942e-05	0.112035	-0.524799	-0.194411	-0.317146	1.21111	-0.462679	0.150202	0.49174	0.591451	-0.666814	-1.56967	-0.442659	-0.926451	-0.866863	0.031	-0.193	0.064	-0.093	0.153	-0.454	-0.85	-0.3	12.657	high
GSM528400	Barretina	-0.410768	-0.109168	-0.335111	-0.100918	-0.20794	0.1583	0.233128	-0.162091	-0.259667	-0.30064	0.014194	0.341246	-0.775534	0.108258	-0.22517	-0.335351	-0.120585	0.0107232	-0.0958843	-0.176786	-0.313586	-0.103463	-0.544477	0.189912	-0.491555	0.284691	-0.284766	0.498665	-0.561498	0.201063	0.609758	0.277766	-0.540437	0.70267	-0.172941	-0.602261	-0.668519	-0.019	-0.126	-0.053	-0.102	0.032	-0.637	-0.718	-0.5	11.3586	low
GSM528401	Barretina	-0.480495	-0.185472	-0.327803	-0.0120712	-0.353112	0.0476666	0.0882956	0.238351	-0.15128	-0.416606	0.126038	-0.112924	1.21973	-0.00508112	-0.877756	-0.262134	-0.227153	0.0953602	0.15356	0.0620788	-0.278137	0.0878547	0.486824	0.155679	-0.428706	0.0431581	-0.339974	2.15834	-0.134617	0.383009	0.697652	0.790868	-0.608683	0.0467365	-0.305302	-0.347997	-0.543829	0.101	0.098	0.101	-0.001	0.11	-0.569	-0.453	-0.359	12.8734	high
GSM528402	Barretina	0.199352	0.0263164	0.192262	0.169531	0.257905	-0.1589	-0.069123	-0.0809782	-0.119409	-0.143933	0.181761	-0.216834	-0.895354	0.103381	0.753905	0.319116	-0.0299181	-0.115163	-0.304864	0.21274	0.466607	0.174616	-0.970032	0.0836654	0.972564	-0.131571	0.234641	-0.326113	0.153961	0.532601	0.493044	0.229768	0.525075	1.12415	0.0663621	0.447806	0.76029	0.025	0.202	-0.006	0.21	0.147	0.172	0.42	-0.435	9.79476	low
GSM528403	Barretina	-0.459811	-0.245704	-0.237896	-0.106892	-0.297926	-0.544732	-0.30754	-0.286741	-0.218657	0.0522532	0.20088	0.113557	-0.0253554	0.424457	-0.702876	-0.336198	0.348228	0.259214	0.436647	-0.0312012	0.12029	-0.634137	-1.32658	0.320277	-0.400631	-0.410745	0.0768894	-1.23489	-1.00128	0.0269978	0.967795	0.2546	-0.868875	-2.85962	-0.673599	-0.987503	-0.887642	-0.054	-0.66	0.026	0.284	0.171	-0.389	-1.101	-0.91	10.8729	low
GSM528404	Barretina	-0.338104	-0.151003	-0.20789	-0.257099	-0.223073	0.0181265	0.129798	-0.200399	-0.302812	0.256115	-0.248601	-0.221146	-0.0253554	0.269631	-0.126466	-0.202337	-0.15193	-0.62601	-0.657451	0.0977847	-0.0105614	0.163852	-0.425628	-0.00347518	-0.0164316	-0.102148	-0.0440103	-0.641856	0.799016	0.403077	0.104652	0.127449	0.0382168	4.54171	0.0835123	0.529726	0.532293	0.018	0.217	0.056	0.153	0.107	-0.071	0.944	-0.634	10.2057	low
GSM528405	Barretina	0.098431	0.39052	-0.324544	0.0222013	1.32881	0.349959	0.225425	0.0233358	0.230355	0.182117	0.157257	-0.129864	-0.910983	0.146059	0.0894525	0.792395	-0.0708619	-0.242905	-0.534949	0.219324	0.439555	1.30302	-0.118922	-0.381541	0.118865	-0.475853	-0.110034	0.26287	0.254076	0.245782	0.292753	0.302726	1.81531	7.45919	1.41392	1.66232	1.27145	-0.129	0.234	0.02	0.131	0.203	0.39	0.497	-0.093	12.3813	high
GSM528406	Barretina	-0.490364	-0.157008	-0.370395	-0.18532	-0.384216	0.189219	0.0904532	0.0939278	-0.0255254	0.356008	0.0886183	0.0793658	0.0319498	-0.0256991	0.176584	0.0241665	-0.0301262	-0.15024	-0.754461	-0.403883	0.0604223	0.0990011	-0.253106	0.0465412	-0.232109	0.419453	-0.319572	0.394429	0.00163994	0.498939	0.265785	0.32258	-0.53454	-3.74159	-0.21988	-0.549546	-0.425105	-0.164	0.513	-0.039	-0.15	-0.216	-0.281	0.644	-0.069	10.9077	low
GSM528407	Barretina	-0.143032	-0.146599	0.00396364	-0.43662	-0.106422	-0.391192	-0.416373	-0.16594	-0.210873	-0.275636	0.0587238	0.272625	-0.650504	0.0423984	-0.630664	-0.233629	-0.260797	-0.388233	-0.731701	-0.120385	0.000821945	-0.790926	-0.4678	0.267337	0.143568	-0.466025	-0.039323	-0.0518617	-0.635902	0.18646	0.996829	0.320613	-0.472659	-3.92924	-0.694862	-0.431802	-0.370351	-0.119	-0.125	0.011	0.21	0.074	-0.217	-0.411	0.033	9.90168	low
GSM528408	Barretina	-0.27193	-0.0641428	-0.230874	-0.238399	-0.0056736	-0.11543	0.14004	-0.0374817	-0.10511	-0.0180704	0.0294778	-0.0083107	-0.160804	-0.136165	-0.215088	-0.174931	-0.0405604	-0.637295	-0.538638	-0.109654	-0.0302987	-0.73555	0.425482	-0.177521	0.158243	0.583911	-0.209158	1.39529	0.943641	0.701226	0.767596	0.464183	-0.20916	2.79989	-0.363766	-0.224885	0.343348	0.011	0.272	-0.044	0.229	0.115	-0.197	0.569	0.387	10.6011	low
GSM528409	Barretina	-0.511938	-0.343046	-0.187658	-0.322224	-0.0234959	0.0470571	-0.124702	-0.392018	-0.252608	0.199946	0.259403	0.267876	0.802966	0.0176454	-0.227275	-0.53107	-0.188407	-0.556157	-0.39417	-0.028309	0.258721	-0.865503	0.164782	0.127912	0.149817	-0.327727	-0.238776	0.8306	-0.724931	0.20791	0.98861	0.299475	-0.691501	-4.2502	-0.785336	-0.881268	-0.678732	0.138	-0.108	0.093	0.09	0.14	-0.394	-0.42	-0.315	13.2547	high
GSM528410	Barretina	-0.436983	-0.219078	-0.242117	-0.201375	-0.357639	-0.0464027	-0.226635	0.0963111	-0.13319	0.115355	-0.0290009	0.158573	0.183027	-0.125709	-0.714998	-0.262997	0.142768	0.0257999	0.189693	0.0723239	-0.1387	0.124323	2.41524	0.0522632	-0.218597	-0.23992	-0.123855	1.25766	-0.350286	0.374384	0.742766	0.353498	-0.615475	-3.98976	-0.331452	-0.203043	-0.32432	-0.039	0.086	-0.13	0.016	-0.119	-0.132	0.581	-0.089	13.8537	high
GSM528411	Barretina	0.400013	0.506572	-0.118399	-0.34155	0.975283	0.307106	0.0978139	0.167835	0.284755	0.385466	0.231128	0.00366105	-0.197271	0.0187294	0.173334	0.3078	-0.233284	-0.203044	-0.148722	-0.41753	0.0794955	-0.383959	0.0881053	-0.104829	0.246135	-0.0452841	-0.035851	-0.505236	-0.386037	0.321532	0.403033	0.21825	2.12564	-2.16494	0.827313	1.34572	0.669329	-0.19	-0.012	-0.107	0.023	-0.173	-0.037	0.017	-0.103	11.2053	low
GSM528412	Barretina	-0.512913	-0.141294	-0.41291	-0.390207	-0.306691	0.534012	0.0570416	-0.395717	-0.114016	0.483997	-0.203513	-0.267858	-1.06727	-0.106342	-0.662647	-0.660756	0.21017	-0.18249	-0.169331	-0.300609	-0.175024	-0.835476	-0.590483	-0.252524	-0.0573444	-0.32643	-0.425388	-0.902951	0.561957	0.17075	0.496376	0.0231018	-0.54483	-2.09076	-0.312236	-0.724754	-0.594794	-0.08	0.228	0.105	0.109	0.054	-0.227	0.394	-0.444	11.3998	low
GSM528413	Barretina	0.0886323	0.150579	-0.0688295	0.32977	0.562623	-0.146666	-0.233094	-0.0102636	0.150123	0.178321	-0.126979	-0.301284	0.042369	0.0846538	1.07289	0.406719	-0.0883618	0.525172	-0.519072	0.34899	0.289814	1.06071	1.18841	0.164669	0.349632	0.353948	0.467092	0.074638	0.635394	0.356956	0.124823	0.377389	1.02313	2.94152	0.818898	0.863386	0.733375	-0.157	-0.009	-0.075	0.001	-0.055	0.14	0.136	0.016	9.83727	low
GSM528414	Barretina	-0.325503	-0.165204	-0.17811	-0.23618	-0.221273	-0.517878	-0.334042	-0.281293	-0.387921	0.0762944	0.366398	1.69599	1.39686	-0.215321	-0.150005	-0.334187	0.736099	0.578901	0.193105	0.123953	0.131796	-0.177865	-0.655658	0.0204882	-0.148798	-0.228834	0.0152767	-1.26019	-0.650447	0.267148	0.737888	0.0834687	-0.663262	-2.00873	-0.214018	-0.71382	-0.299172	-0.296	-0.534	-0.072	-0.098	0.007	-0.325	-0.757	-0.707	12.9752	high
GSM528415	Barretina	-0.503127	-0.405326	-0.108668	-0.499013	-0.797096	0.213184	-0.123876	0.0736913	-0.25165	0.313823	-0.0212573	0.615288	-0.322301	0.132305	-0.45095	-0.442604	-0.148977	-0.540325	-0.202637	-0.141089	-0.00602812	-0.532868	0.916213	0.0331693	0.108321	-0.221084	0.169846	1.09878	1.59275	0.159124	0.837666	0.165147	0.45833	0.111508	-0.421066	-0.636362	-0.495072	-0.139	0.396	0.122	0.167	-0.006	-0.359	0.688	0.155	11.0378	low
GSM528417	Barretina	0.0887566	0.164324	-0.0839638	-0.0087975	0.355813	0.256323	-0.0391941	-0.0124071	-0.0189389	0.528863	0.102088	-0.0243592	-0.806791	-0.167367	-0.358244	0.334622	-0.33265	0.298452	-0.398178	-0.339079	0.243327	1.49548	-0.429462	-0.178143	0.381275	-0.325241	0.192994	-0.246165	-0.18402	0.205416	0.203572	0.0338147	0.884592	8.04551	1.00612	1.41391	0.958963	-0.064	0.006	0.027	-0.007	0.16	0.38	-0.318	0.087	10.7879	low
GSM528419	Barretina	-0.0349766	0.0723914	-0.119298	0.593242	0.777754	-0.0410668	-0.204224	0.30185	0.0355679	-0.0892738	0.072274	-0.547016	0.0944647	0.0720239	0.636488	0.791961	0.145522	-0.0184072	0.258594	0.606219	0.289704	0.639237	0.701518	-0.153212	0.537384	1.39334	0.0586403	0.279061	0.0890527	0.724341	0.333062	0.463374	0.768859	0.509084	0.373549	0.547595	0.4315	-0.004	0.246	-0.017	0.03	0.097	0.766	0.636	0.612	12.031	high
GSM528421	Barretina	-0.378766	-0.204091	-0.194083	-0.0747993	-0.0818852	-0.575306	-0.095381	-0.0528344	0.183245	-0.0402586	-0.0600632	0.375055	1.78237	-0.247623	-0.049284	-0.268494	0.340135	-0.0637052	0.390018	0.762906	0.165583	0.48589	1.41078	-0.0575749	0.41837	0.0596947	0.0586024	0.367105	1.05249	0.552625	0.126076	0.803793	-0.283655	-2.56589	0.150588	-0.242082	-0.404435	-0.236	0.116	-0.039	-0.164	-0.048	0.34	1.345	-0.081	10.5406	low
GSM528422	Barretina	-0.215231	0.176527	-0.435287	-0.209695	0.905523	-0.0439809	0.245137	-0.526918	0.00858084	-0.128054	0.353365	-0.746381	0.334105	0.0511601	-0.0356899	0.443597	-0.0579333	-0.108049	0.0348276	0.223756	0.0602314	1.0995	0.632509	0.148922	0.232033	-0.242568	0.0520321	1.00568	-0.341312	0.510517	0.733863	0.892829	0.64552	2.60414	0.985876	1.0798	1.11101	0.143	0.126	0.148	-0.06	0.121	0.416	0.161	0.151	14.7644	high
GSM528423	Barretina	-0.257101	-0.194075	-0.0700292	-0.2433	-0.615006	0.0651951	-0.216598	-0.318814	-0.189662	0.200047	-0.121752	-0.0425715	-0.785953	-0.0390272	-0.497986	-0.375541	-0.0999418	-0.0281941	-0.234257	0.0981451	0.162527	-0.557997	-1.21923	-0.230734	0.614655	-0.0759014	0.312271	-0.0548977	0.91726	0.373647	0.118267	0.429496	-0.734365	-1.21422	-0.621984	-0.850167	-0.551422	-0.12	-0.012	0.184	0.138	0.025	-0.396	-0.373	-0.258	10.471	low
GSM528424	Barretina	-0.273349	-0.161378	-0.124413	-0.221205	0.258714	-0.447743	0.044115	-0.0750835	0.0524138	-0.0444164	-0.134514	-0.531932	-0.436912	0.00459636	-0.201842	0.0627755	0.15257	0.134243	0.292582	0.615437	-0.168808	0.572274	0.226123	0.228231	0.0316065	0.10271	0.0639583	-0.676264	-0.56338	0.83222	0.795988	0.171072	0.0751426	1.51599	0.181621	0.299998	0.35229	-0.113	-0.165	-0.031	-0.173	0.023	0.129	0.442	-0.442	13.4273	high
GSM525806	Chibon	-0.451424	-0.291026	-0.17822	0.0147182	0.429151	-0.60761	-0.0192806	-0.275631	0.410385	-0.502165	0.201894	-0.578402	-0.28282	0.412687	-0.486842	0.734934	-0.11463	-0.154283	0.197446	0.465878	-0.301394	0.286689	0.296201	0.779502	-0.164267	-0.0343932	0.247464	1.37796	0.624335	0.987589	0.851041	0.748257	0.165863	-0.606612	0.898129	0.11952	1.59951	-0.053	0.064	0.039	0.549	0.038	-0.071	0.667	0.041	11.6331	low
GSM525807	Chibon	-0.107879	0.251259	-0.399042	0.170038	1.34481	0.243437	0.599442	0.291487	0.146093	0.276861	0.352507	-0.519245	-0.598441	0.505631	0.400987	0.844563	-0.136039	-0.212496	-0.102212	-0.304046	-0.0372912	0.834145	-0.424015	-0.125741	0.30295	0.00470858	-0.0286137	1.2796	0.41134	0.857577	0.849564	0.800809	1.3911	1.85126	0.932417	1.23266	1.07046	0.139	0.101	0.165	0.23	0.205	0.28	0.058	0.631	11.4318	low
GSM525808	Chibon	-0.99286	-0.865614	-0.141384	-0.255624	-0.632664	0.15273	-0.383456	-0.302669	-0.0857984	0.362659	-0.0128818	-0.374519	-0.720952	-0.123161	0.155552	-0.390943	-0.20151	0.0352154	-0.168467	-0.506705	0.0150367	-0.815292	-1.21938	-0.31698	0.282879	-0.384914	-0.201929	-0.149463	-0.047196	0.0845254	0.945035	0.281836	-0.791028	-2.71268	-0.822137	-0.904762	-0.817383	0.115	0.062	0.179	0.201	0.072	-0.699	-0.8	0.232	12.2676	high
GSM525809	Chibon	-0.174375	-0.164609	-0.010851	-0.258885	-0.0887415	-0.0479846	0.00349272	-0.428936	-0.259804	0.24378	0.236005	0.327553	-1.03657	0.144555	0.106383	-0.14023	-0.0277801	-0.247454	0.0916779	0.0319281	0.0581125	0.161322	-1.02524	-0.15365	-0.0392666	-0.266153	-0.061557	-2.03155	0.306759	0.68018	0.892288	0.822528	0.151144	-0.858994	0.26932	0.372112	0.234398	-0.08	-0.167	-0.028	0.103	0.048	0.155	-0.337	-0.799	11.9079	high
GSM525810	Chibon	-1.08551	-0.617289	-0.520247	-0.247961	-0.606471	-0.229877	-0.205601	-0.379321	-0.326649	0.491619	0.402834	-0.64625	-0.482159	-0.229385	-0.373267	-0.655108	-0.0299966	0.687191	-0.38681	-0.873429	-0.136916	-0.664962	-0.97305	-0.343757	-0.242303	-0.428849	-0.343014	-0.427521	-0.132033	0.134137	0.327287	0.298228	-0.903402	-5.10167	-0.648902	-1.01133	-0.795192	-0.012	0.046	0.012	-0.092	-0.014	-0.738	-0.764	0.203	12.0459	high
GSM525811	Chibon	0.326121	0.20999	0.129034	0.402731	1.24161	0.388579	0.294426	0.232764	0.396522	0.322933	0.0687906	0.261525	-0.316043	0.458521	1.4014	0.770899	-0.404931	0.473234	0.0121712	0.216486	0.0107029	1.15237	-0.975137	0.085723	0.108932	-0.548229	0.233846	-0.944859	0.833642	0.453768	0.387395	0.293825	1.73663	4.184	1.0469	1.34639	0.454877	-0.144	0.098	-0.107	0.152	0.099	0.096	0.318	-0.593	9.99307	low
GSM525812	Chibon	-1.00748	-0.659779	-0.386333	-0.441283	-0.747649	0.0366053	0.103823	-0.180871	-0.173247	0.204785	0.199085	-0.619157	-0.421942	0.0580002	-0.966129	-0.314668	0.128133	-0.255741	-0.256529	-0.038356	0.0169861	-0.819337	-1.08995	0.380855	-0.393087	-0.574683	-0.388265	-0.855011	-0.636226	0.227413	0.989783	0.214494	-0.906086	-7.45998	-0.758524	-1.06972	-0.898227	0.023	0.214	0.089	0.287	0.027	-0.544	-0.471	0.323	12.8878	high
GSM525813	Chibon	-0.714359	-0.570092	-0.160297	-0.157122	-0.0315683	0.000654018	0.0604423	0.126171	0.0497499	0.415186	-0.126375	0.220798	-0.116703	-0.18703	0.890355	0.247331	0.00113149	-0.308914	-0.568869	0.187984	0.421092	0.227429	-0.530482	-0.151064	0.00606769	-0.365541	0.0633058	0.993979	0.106946	0.319369	0.258829	0.190871	0.434506	5.04251	0.080802	0.0857269	0.351515	0.178	0.243	0.065	0.016	0.135	-0.347	0.545	0.144	11.0394	low
GSM525814	Chibon	0.322102	0.508788	-0.207428	0.949798	1.7541	-0.0614162	0.189234	0.27746	0.368209	-0.214563	0.628871	0.295764	0.340117	0.551679	1.15275	1.5115	-0.117977	0.176765	0.111879	0.048628	0.210877	0.758033	-0.0106736	0.35009	0.0807886	-0.21082	0.125059	1.72885	0.469274	0.764591	0.64514	0.728546	2.42609	0.876024	1.54015	1.48708	1.05713	0.028	0.116	-0.148	-0.063	-0.064	0.105	0.568	-0.013	12.1572	high
GSM525815	Chibon	-0.268983	-0.467015	0.220036	-0.160151	-0.18209	-0.280869	0.255011	0.107725	0.00236402	-0.0679697	0.101225	-0.103052	-0.648276	0.287467	-0.0683517	-0.0950813	-0.256893	-0.320381	-0.514386	-0.0817819	0.269882	0.224773	-0.380176	-0.16016	0.0386233	-0.0905044	0.249212	1.79127	-0.336526	0.480784	0.692646	0.521724	0.078257	0.656103	-0.0440418	0.145723	0.103241	0.173	0.118	0.191	0.184	0.098	-0.558	-0.288	-0.097	13.1944	high
GSM525816	Chibon	-0.74931	-0.594002	-0.172564	-0.0884868	0.0703547	-0.108541	0.0437851	-0.0538521	0.00100481	0.240964	-0.135706	0.24249	-0.714722	-0.0892836	-0.0176591	0.160407	-0.154413	-0.393	-0.298134	-0.223511	0.113582	-0.431747	-0.952174	-0.1637	0.261127	-0.113082	-0.156608	0.20804	0.344449	0.842496	0.384037	0.475295	-0.0381035	-2.51468	-0.129898	-0.204123	-0.110472	0.077	0.077	-0.025	-0.128	-0.029	0.124	0.01	0.73	12.145	high
GSM525817	Chibon	-0.201057	-0.233712	0.0362828	0.169433	0.0369406	0.177958	-0.0029705	0.220918	0.247514	0.324675	-0.0167047	0.992638	0.122089	-0.203759	0.488069	0.0489833	-0.0519001	-0.0681599	-0.32017	0.536493	0.178304	0.0937957	-0.86867	0.0926162	0.456687	-0.118345	0.548816	-1.55299	0.935539	0.551821	0.121716	0.345365	0.0232976	2.3953	-0.000471148	0.293198	0.0680139	-0.084	0.077	0.026	0.013	-0.013	0.495	0.688	-0.554	9.54552	low
GSM525818	Chibon	0.264272	0.427067	-0.180883	1.4777	1.66354	0.0276639	0.759871	-0.0775177	-0.063146	-0.179689	0.551079	-0.0234923	-0.6109	0.376999	0.688158	0.602691	-0.294791	-0.331252	-0.328064	-0.0971913	0.0564588	0.177812	0.116669	-0.111931	0.215469	0.127666	-0.295336	0.251546	-0.0550235	0.887025	0.301473	0.887664	1.45555	-3.03272	0.694538	0.873635	1.12679	0.027	0.293	-0.02	-0.091	-0.091	-0.176	0.035	0.512	11.1927	low
GSM525819	Chibon	0.449071	0.0943937	0.394086	0.630074	1.02622	-0.04079	0.534175	0.468883	-0.115507	-0.312539	0.188115	2.38325	-0.843463	-0.00275125	0.484766	0.343561	-0.252533	0.0125013	0.379605	0.261427	0.437857	0.574772	-0.716277	0.0523813	0.711521	0.0637781	0.266245	-0.423738	0.312918	0.512067	0.268345	0.429458	1.06381	3.95547	0.397608	0.900201	0.919782	-0.077	0.161	-0.07	-0.047	0.015	0.262	-0.116	-0.317	10.5551	low
GSM525820	Chibon	-0.0557724	-0.013866	-0.0465626	-0.0841445	0.961362	-0.00721334	0.394752	0.217264	0.229124	-0.0545834	0.217653	0.0460765	-0.814392	0.282523	0.714111	0.842537	0.0318433	-0.130587	0.0531621	0.065143	0.151268	0.875349	-0.872846	-0.105068	0.39619	0.199042	0.0775916	0.422731	0.527941	0.629968	0.121716	0.754811	1.42985	4.62649	0.982144	1.33763	0.800609	0.043	0.314	0.162	-0.076	0.128	0.328	0.757	0.053	11.394	low
GSM525821	Chibon	-1.31476	-0.718369	-0.662655	-0.0954768	-0.527456	-0.103916	0.311322	0.170449	-0.122207	0.0662421	0.36663	-0.754951	-0.627511	-0.114307	-0.438562	-0.508576	-0.204827	-0.656182	-0.355782	-0.431122	0.0564127	-0.976074	-0.319636	-0.169007	-0.474423	-0.00727477	-0.536587	-0.358479	-0.76663	0.272625	0.344408	0.285598	-1.15465	-4.47369	-1.01361	-1.08699	-0.95863	0.043	0.2	0.055	-0.293	-0.113	-0.254	-0.064	0.513	11.3224	low
GSM525822	Chibon	-0.363966	-0.0749626	-0.321115	-0.273209	0.150345	-0.111407	0.828104	-0.353482	-0.336064	-0.558113	-0.0510788	0.267612	-0.534071	0.292656	1.05516	0.620639	-0.238806	-0.415688	0.29928	0.370924	0.24035	0.0804497	0.477821	0.2206	0.0241428	-0.0028531	-0.0924274	-0.251607	-0.878328	0.367733	0.5643	0.827973	-0.0625547	-1.20106	-0.226503	0.0340737	-0.173484	-0.085	-0.13	-0.011	-0.004	0.008	-0.17	-0.194	-0.491	10.5734	low
GSM525823	Chibon	-0.930914	-0.785448	-0.16163	-0.38692	-0.906987	0.223173	0.00319025	-0.0148964	-0.230236	-0.288082	-0.435051	-0.183378	-0.596364	-0.0373975	-0.538114	-0.396484	-0.207114	-0.120133	-0.147203	-0.413115	-0.0669992	-0.666243	-1.05029	-0.156178	0.150308	-0.414154	0.0296124	0.132378	0.282932	0.241913	0.823164	0.630957	-0.647925	0.843637	-0.616801	-0.688233	-0.548754	0.03	-0.086	0.214	0.332	0.052	-0.407	-0.779	0.409	11.3643	low
GSM525824	Chibon	-0.798028	-0.429157	-0.409858	-0.368625	-0.508969	0.263663	0.252688	-0.167106	-0.371029	0.533028	-0.103092	-0.494726	-1.31897	0.272313	-0.461569	-0.403809	0.00198323	-0.611138	-0.465568	-0.0832895	-0.291718	-0.0489346	-1.1839	-0.261218	-0.0661599	-0.496655	-0.498874	0.0463125	0.681833	0.694236	0.156465	0.587265	-0.817069	3.36175	-0.55089	-0.239931	-0.571634	-0.018	0.34	0.148	-0.042	0.112	-0.314	0.706	-0.755	12.0663	high
GSM525825	Chibon	-0.446847	-0.155252	-0.323994	0.168396	0.557267	0.505207	0.204342	0.307625	-0.0166078	0.172775	0.0458884	-0.418668	-0.334731	0.0821843	-0.200765	0.357646	0.00487845	0.117467	-0.749668	-0.151873	-0.0692505	0.56926	-0.998101	-0.0687692	0.0865964	0.530355	-0.0169548	0.644042	-0.216089	0.384292	0.121716	0.334446	0.657486	2.99356	0.381891	0.736967	0.489959	0.013	0.309	0.07	0.032	0.135	-0.245	0.495	0.173	10.3487	low
GSM525826	Chibon	0.496706	0.535314	-0.0428988	-0.0700855	2.07134	0.797026	0.591533	0.535531	0.469294	0.352571	0.308499	-0.188824	-0.702264	0.657306	1.82743	1.97315	-0.0988704	0.44195	0.344957	0.77816	0.282909	1.47974	0.415193	-0.0149808	0.498581	-0.0424272	0.427725	-0.0785298	0.512465	0.481021	0.418151	0.311087	2.49661	11.3461	2.10675	2.20651	1.79136	0.026	0.115	0.157	0.219	0.363	0.419	0.296	-0.104	10.8708	low
GSM525827	Chibon	-0.765273	-0.496514	-0.298621	-0.368159	-0.175155	0.459785	0.00469887	0.0627051	-0.282173	0.320023	-0.521749	-0.196608	-0.720952	-0.0683912	-0.273315	-0.518752	0.060502	0.338158	0.2789	-1.18535	-0.145555	-0.832809	-1.34046	-0.19736	0.268405	-0.507071	-0.418881	-1.76012	0.0798895	0.14898	0.968745	0.478207	-0.695024	-1.85099	-0.665348	-0.633438	-0.749024	-0.045	0.032	0.087	0.008	-0.024	-0.671	-1.205	0.132	12.6508	high
GSM525828	Chibon	-0.898078	-0.660341	-0.264152	0.109252	-0.492687	0.131276	0.535019	0.135569	-0.057068	0.324801	-0.247447	-0.456046	-0.681499	-0.0559745	-0.0734844	-0.0403193	-0.243296	-0.402985	-0.394197	0.0878556	0.185263	-0.167171	1.2878	-0.248053	0.14803	-0.219295	0.36707	0.639313	-0.19621	0.315593	0.183817	0.55007	-0.216035	3.59403	-0.282019	-0.0198312	-0.372385	0.143	0.162	0.114	0.093	0.188	-0.191	0.613	0.045	11.2264	low
GSM525829	Chibon	-0.518214	-0.280041	-0.264637	-0.237423	-0.428014	-0.289922	-0.379365	0.0845095	-0.210674	-0.485568	-0.428954	0.555666	-1.08641	-0.185477	0.337926	-0.422009	-0.274638	0.633579	0.0630135	-0.665931	0.262379	0.0944137	-0.714189	-0.224388	-0.729947	-0.588774	-0.327486	-1.79984	-0.881177	0.120408	0.921159	0.993618	-0.965325	-7.1125	-0.603645	-1.24179	-1.0843	-0.506	-0.802	-0.347	-0.464	-0.48	-0.291	-1.062	-0.615	10.2455	low
GSM525830	Chibon	-1.1855	-0.727246	-0.509174	-0.300444	-0.600528	-0.225481	-0.166668	-0.182831	-0.148972	0.400666	-0.110083	0.379861	-0.436477	-0.391243	-0.108502	-0.497803	-0.200842	-0.00263754	-0.169734	-0.61936	0.0109654	-0.393592	0.0582166	-0.174277	-0.407024	-0.126668	-0.254264	0.155077	0.229101	0.218242	0.121716	0.327821	-0.828094	-0.268445	-0.696544	-0.690847	-0.784636	0.03	-0.117	0.019	-0.125	-0.084	-0.317	-0.237	0.483	10.9086	low
GSM525831	Chibon	-0.109316	-0.0769497	-0.0359626	-0.0182855	0.928495	0.684277	0.39312	0.484895	0.105734	0.684649	-0.115372	0.0821155	-0.31812	0.487182	0.341944	1.28749	-0.0639948	0.129129	-0.843483	0.370075	0.579282	0.847646	0.770083	0.0846589	0.444788	0.306853	0.106474	0.251546	-0.486342	0.256807	0.121716	0.129049	1.07284	9.45084	1.21442	1.36513	1.04939	0.181	0.035	0.266	0.308	0.438	0.116	-0.407	-0.236	11.3602	low
GSM525832	Chibon	-0.47148	-0.468348	-0.00347977	-0.0297129	0.0250906	0.289877	0.0625101	-0.244779	-0.114623	0.149654	0.254969	-0.163229	-1.05734	0.0566176	-0.00408849	-0.172802	-0.276998	-0.208132	-0.379307	-0.174163	0.140583	0.128293	-1.02733	-0.241167	-0.188725	-0.366092	-0.107341	-0.526827	-0.744028	0.280552	0.719769	0.198292	-0.206977	-0.406903	-0.149796	-0.00869485	0.187516	0.208	0.15	0.153	0.153	0.261	-0.494	-0.276	-0.126	12.192	high
GSM525833	Chibon	-0.307008	-0.489759	0.203057	-0.294004	0.0905442	0.347979	0.289339	0.145223	0.0189629	0.289508	-0.140867	0.0720057	-0.671117	0.168569	-0.684801	-0.325772	-0.361217	-0.61482	-0.31416	0.129218	0.0340387	0.287469	-0.300848	-0.0252988	0.975338	-0.231651	0.398474	-0.325377	0.106251	0.519995	0.940801	0.455995	0.203012	3.58568	-0.0224007	0.467708	0.351952	0.178	0.224	0.296	0.446	0.408	0.096	-0.083	0.29	10.9801	low
GSM525834	Chibon	-0.0845512	0.090701	-0.194725	0.0975714	1.41587	0.349671	0.615975	0.202083	0.314764	0.0203633	-0.0259511	-0.517157	-0.843463	0.228533	1.61666	1.18219	0.0396623	0.161855	-0.297527	0.285371	0.106999	0.811514	0.218961	-0.0246988	0.389673	0.601988	0.118129	0.967497	-0.401024	0.749129	0.414125	0.892735	1.82637	5.90912	1.02574	1.33212	0.922497	0.526	0.117	0.062	0.07	0.224	0.477	-0.11	0.51	12.4668	high
GSM525835	Chibon	-0.9147	-0.575631	-0.376743	-0.141808	-0.719152	-0.302506	0.359962	-0.0456518	-0.43233	-0.6965	-0.146636	-0.521599	-0.143697	0.286709	-0.311296	-0.225518	-0.0287455	-0.415437	-0.412703	-0.267587	-0.404162	-0.963208	-1.89785	-0.167853	-0.381121	-0.449707	-0.724486	-1.06403	0.0476233	0.967252	0.762439	0.516039	-1.11686	-11.9306	-1.068	-1.05995	-0.944631	-0.025	0.279	-0.031	-0.299	-0.212	-0.786	-0.198	-0.195	9.9992	low
GSM525836	Chibon	-0.332659	-0.318167	-0.0161017	-0.128424	0.0121415	-0.393886	0.31906	-0.125588	-0.141314	0.0139501	0.117563	0.187456	-0.808163	0.202714	0.301405	-0.125218	-0.223949	-0.170561	-0.242331	-0.0965243	0.0526679	0.606196	-0.576409	-0.0355573	0.114916	0.739022	-0.132954	0.308292	0.593461	0.777975	0.349894	0.804431	-0.140013	-3.0376	-0.218195	-0.340457	-0.163372	-0.082	0.087	0.002	-0.04	-0.093	0.014	0.657	-0.325	10.0033	low
GSM525837	Chibon	-0.473704	-0.361388	-0.124796	0.0463803	-0.238725	-0.328247	0.468691	-0.292791	-0.481299	-0.787653	0.135914	0.519005	-0.295279	0.232525	-0.176062	-0.217369	-0.222803	-0.615988	-0.14931	-0.501966	-0.230794	-0.549328	-0.79143	-0.377716	-0.619126	-0.712584	-0.451705	-1.28534	-1.40558	0.261229	0.153669	0.922547	-0.277006	-3.98419	-0.510299	-0.420379	-0.594437	0.061	-0.03	-0.081	-0.332	-0.012	0.382	-1.084	-0.604	13.035	high
GSM525838	Chibon	-0.118674	0.289759	-0.453815	-0.089249	1.44436	0.15527	0.113713	-0.436677	0.116315	0.51175	0.263387	-0.259644	-1.17777	0.526036	0.572697	0.830583	-0.113491	-0.0262824	-0.168186	0.221138	0.123574	0.175088	-0.344687	-0.0497197	-0.266552	-0.436827	-0.23981	-0.16365	1.0847	0.717659	0.949689	0.583187	1.99694	-0.108959	1.20741	1.34676	0.929167	0.259	0.088	0.117	0.181	0.249	0.189	0.53	0.254	11.2642	low
GSM525839	Chibon	-1.11736	-0.777784	-0.377308	-0.109134	-0.7171	-0.0463676	0.0964973	-0.291225	-0.087736	0.224717	0.0438337	-0.659997	-1.33558	-0.196067	-0.511179	-0.627521	-0.0154419	-0.387613	-0.529572	-0.922614	-0.223548	-0.926941	-1.16928	-0.239884	-0.0631022	-0.161866	-0.169313	-0.394419	0.336587	0.185007	0.978731	0.395114	-0.803555	-6.5849	-0.751329	-0.921255	-0.655348	0.073	0.149	0.05	-0.163	-0.286	-0.411	-0.508	0.572	10.8861	low
GSM525840	Chibon	-1.03423	-0.673177	-0.401173	-0.224966	-0.547947	0.0981054	0.286705	0.23311	-0.0330874	0.315554	-0.0149806	0.239547	-0.473854	0.236638	-0.380085	-0.456296	-0.213299	-0.228457	-0.626729	-0.607285	-0.229159	-0.199593	0.517485	0.161039	-0.32693	-0.400122	-0.278405	1.84801	-0.136467	0.17403	0.146093	0.371429	-0.463546	-0.104709	-0.484766	-0.69491	-0.31537	0.17	0.477	0.113	-0.072	-0.013	-0.704	0.227	-0.398	11.396	low
GSM525841	Chibon	-0.896674	-0.579132	-0.352825	-0.0197899	-0.486641	0.0453902	-0.101263	-0.538971	-0.345928	0.0704849	-0.0163894	-0.479327	-0.654505	-0.251514	-0.0568145	-0.261926	-0.0825968	-0.666901	-0.203726	-0.37966	0.16392	-0.524247	-0.417752	-0.379533	-0.582543	-0.459029	-0.405284	-0.698958	-1.13467	0.926838	0.854338	0.882669	-0.821697	-1.41977	-0.777716	-0.872902	-0.802071	0.636	-0.243	0.054	-0.06	0.133	-0.286	-0.187	0.056	13.9812	high
GSM525842	Chibon	-0.563901	-0.557594	-0.00700809	-0.111499	-0.0589284	-0.511743	0.257515	-0.10493	-0.0828552	0.0603784	0.0745391	1.07399	-1.25875	-0.0631725	0.0888189	0.704065	-0.174845	-0.198989	-0.344372	-0.00680881	-0.0817495	-0.381424	-0.10044	0.150262	-0.127491	-0.123676	0.294028	1.19732	0.30978	0.743801	0.982245	0.712068	0.0855894	-2.61188	-0.104078	-0.417954	-0.314904	-0.054	0.199	0	0.116	-0.125	-0.219	0.6	0.105	12.6835	high
GSM525843	Chibon	-0.764795	-0.825347	0.0672804	-0.259451	-0.485279	-0.0768596	-0.0324242	-0.0449948	-0.252543	0.23357	-0.0324854	0.107908	-0.301508	-0.218702	-0.0129196	-0.246947	-0.178282	0.168425	-0.232138	-0.30765	0.0143938	-0.981452	0.352566	-0.156027	-0.105703	-0.147827	0.220821	-0.295112	0.460881	0.335392	0.492732	0.410913	-0.633919	-1.37099	-0.473899	-0.564871	-0.214525	-0.042	-0.116	0.108	0.09	-0.019	-0.456	-0.704	0.289	11.9856	high
GSM525844	Chibon	-0.806779	-0.359863	-0.496573	-0.0998331	0.205342	-0.166284	0.0520956	0.215806	-0.0710219	0.644033	0.187757	-0.212864	-0.710569	-0.0411247	0.0554838	-0.216294	-0.189577	-0.753728	0.0677346	0.159761	0.1965	0.0744863	1.03729	-0.000452278	-0.11644	0.059847	0.132381	0.497447	0.774207	0.510444	0.121716	0.306235	-0.0938815	-0.245535	-0.189957	0.129088	0.19254	0.182	0.312	0.197	0.071	0.132	-0.232	0.506	0.117	10.9791	low
GSM525845	Chibon	-0.445364	-0.098099	-0.38585	0.652192	0.496014	0.339456	0.170261	-0.307771	-0.0151785	0.521524	0.0818261	-0.212124	-0.797781	0.128448	0.0891092	0.122187	-0.283876	-0.519662	-0.215169	0.0128527	-0.056432	0.951502	0.657353	-0.00808472	-0.306968	-0.0350977	-0.14553	-1.22386	-0.280614	0.481064	0.121716	0.151914	0.466502	5.58856	0.462576	0.866682	0.65748	0.063	0.083	0.012	-0.047	0.21	-0.103	0.556	-0.564	10.5663	low
GSM525846	Chibon	-0.370379	-0.113663	-0.28524	-0.239907	0.289345	-0.643587	-0.0530077	0.0604924	-0.0339998	-0.277828	0.0704593	0.0137915	0.207223	-0.100545	0.199319	0.370406	0.149972	-0.224826	0.481224	-0.222843	0.253368	-0.172556	0.344216	-0.0372552	-0.51798	-0.102312	-0.326018	0.200474	-0.530659	0.990126	0.610987	0.973775	0.293088	-0.590732	0.105416	0.204159	0.355495	0.129	-0.322	-0.163	-0.127	-0.108	-0.004	-0.171	-0.491	12.5322	high
GSM525847	Chibon	-0.475527	-0.221829	-0.281887	-0.069649	0.368846	0.181663	0.36411	-0.311942	-0.181601	0.454797	0.313827	-0.111026	-0.44063	0.183964	-0.295072	0.142967	-0.0868939	-0.429799	0.420788	0.108035	0.208584	0.241021	0.477821	-0.0657311	-0.0994082	-0.190026	-0.0487537	-0.336726	-0.0968006	0.398121	0.969513	0.531242	0.275716	4.18363	0.456781	0.170667	0.631943	0.148	-0.135	0.232	0.175	0.251	-0.161	-0.587	-0.133	11.7066	high
GSM525848	Chibon	0.0235283	0.145089	-0.135068	0.212291	1.09922	0.291422	0.457563	0.13253	0.319796	0.648449	0.43966	-0.268845	-0.627511	0.256566	0.57513	1.37304	-0.295056	-0.0331217	0.0992061	0.0948539	0.370951	1.16086	1.34208	-0.168782	0.113184	0.6119	0.300472	0.442592	-0.0552153	0.472582	0.197282	0.16888	1.83557	4.77571	1.3705	1.56654	0.874998	0.243	0.156	0.225	0.27	0.334	0.487	0.125	0.093	10.7758	low
GSM525849	Chibon	-1.1201	-0.715237	-0.449853	-0.302725	-0.689419	0.150463	-0.0823281	-0.0766897	-0.558389	0.329018	-0.146372	-0.390681	-1.20892	-0.0226571	-0.257792	-0.51727	-0.190359	-0.0771362	-0.176954	-0.401838	0.0427835	-0.876464	-0.396877	-0.138134	-0.171634	-0.683799	-0.226816	-0.393473	0.428534	0.0956847	0.20874	0.105848	-0.901382	-1.02046	-0.846247	-0.865715	-0.671265	0.07	0.116	0.26	-0.042	0.066	-0.631	-0.513	0.272	10.2945	low
GSM525850	Chibon	-0.184566	-0.601967	0.463779	0.678014	-0.0139601	-0.43275	-0.168939	-0.128224	0.0212301	-0.0659049	0.0189866	0.372736	-0.519536	-0.0653645	-0.145388	-0.126523	-0.254849	0.332161	0.104411	0.314779	0.495563	0.52035	-0.265359	0.132432	0.595695	0.356524	0.588831	0.173992	-0.0194348	0.35156	0.261535	0.636936	0.0364868	-1.26386	-0.0763046	0.213579	0.262819	-0.03	-0.005	0.137	0.065	0.035	-0.291	-0.286	0.387	12.3054	high
GSM525851	Chibon	-1.01786	-0.593924	-0.471037	-0.342843	-0.760171	0.156797	0.563548	-0.0531249	-0.264561	0.113041	-0.68414	-1.46072	-1.25252	0.0439563	-0.457551	-0.561319	0.0327249	-0.845288	-0.279144	-0.75693	-0.54734	-0.939433	-2.1588	-0.093978	-0.647738	-0.522058	-0.647454	-1.04795	-1.09582	0.938555	0.999889	0.814267	-0.931354	2.4759	-0.877052	-0.66914	-0.711824	0.521	-0.363	-0.067	0.045	0.171	-0.161	-0.267	-0.052	12.5435	high
GSM525852	Chibon	-0.778915	-0.650044	-0.14319	0.21227	-0.434755	0.1847	-0.211459	-0.591747	-0.145364	0.219158	0.405164	0.0462502	-0.766634	-0.502047	-0.520236	-0.0554076	-0.042189	-0.12568	-0.0255663	-0.478493	0.142354	0.0185354	-0.152629	-0.138005	0.0774116	-0.311983	0.151329	-0.887167	-0.0694363	0.198002	0.547911	0.581848	-0.545569	-2.90986	-0.412547	-0.181124	0.169665	0.015	-0.082	0.08	-0.082	-0.01	-0.069	-0.578	0.264	14.303	high
GSM525853	Chibon	-0.891596	-0.608079	-0.315019	-0.262572	-0.309147	0.13035	0.0140028	-0.205993	-0.377215	0.225439	0.0467069	-0.746899	-0.372107	-0.408699	-0.431447	0.00794185	0.0371453	-0.0200222	-0.0185531	-0.628151	0.0154696	-0.910105	-0.22987	-0.115591	-0.0898033	-0.140238	-0.120973	-0.434141	-0.242572	0.243366	0.818965	0.703904	-0.762703	-7.1768	-0.21336	-0.545933	-0.856237	-0.062	-0.066	0.091	0.027	-0.052	0.01	-0.58	0.401	13.3762	high
GSM525854	Chibon	-0.942345	-0.607812	-0.371703	-0.393595	-0.524029	0.165972	0.0775064	-0.053721	-0.0153481	0.0210785	0.206308	-1.03181	-0.988814	0.242368	-1.15767	-0.37209	-0.424819	-0.0973167	-0.167106	-0.830323	0.0581632	-1.01237	-1.80808	-0.0776473	0.185998	-0.371037	0.0140261	-0.585465	-0.105451	0.330086	0.536091	0.326231	-0.526473	-4.27304	-0.786188	-0.48402	-0.708769	0.117	0.064	0.231	0.042	0.019	-0.44	-0.393	0.589	12.0735	high
GSM525855	Chibon	0.0041914	0.148213	-0.160024	0.530206	1.23759	-0.315852	0.1406	-0.00644452	0.172568	-0.184679	0.15725	-0.561222	-1.04903	0.221385	0.616074	0.556591	-0.0918431	-0.298362	-0.513283	-0.114413	0.138127	0.161188	-0.405227	0.118132	0.18843	0.238853	-0.29617	-0.535339	-0.323401	0.838879	0.629833	0.695126	0.858321	-1.2117	0.430278	0.767873	0.647617	-0.117	0.288	-0.093	-0.079	-0.173	-0.192	0.355	0.704	10.9004	low
GSM525856	Chibon	-0.85638	-0.762863	-0.103908	-0.379054	-0.452281	-0.0438761	0.0279783	0.13045	-0.0037336	0.242123	-0.184008	-0.15429	-0.583906	-0.0122743	-0.460076	-0.156758	-0.188451	0.0592001	-0.632776	-0.740991	-0.174321	-0.835461	0.135457	-0.0395365	0.337014	-0.388468	0.476257	0.884269	0.240566	0.31977	0.516249	0.145444	-0.288905	3.15507	-0.479912	-0.355816	-0.628405	0.159	0.11	0.264	0.221	0.239	-0.537	-0.367	0.375	11.9692	high
GSM525857	Chibon	-0.362951	-0.399749	0.0408865	-0.151148	0.0736863	-0.552359	0.0508058	0.118021	0.0455386	-0.903364	0.0801843	0.267371	-0.571447	0.168746	0.166572	0.222585	-0.310325	-0.148577	-0.504668	0.858004	0.33715	0.263734	-0.261184	0.439618	0.119493	0.311928	0.423808	1.64278	0.0276958	0.990801	0.842272	0.838912	0.135946	-2.68284	-0.288898	-0.301526	0.0343849	0.122	-0.042	-0.108	-0.11	-0.082	-0.191	0.586	-0.556	11.8129	high
GSM525858	Chibon	-0.847998	-0.62115	-0.252053	-0.275458	-0.453798	0.0104942	0.251879	-0.268383	-0.0755015	0.209638	-0.0734658	-0.517743	-1.00958	-0.0778283	-0.123079	-0.52067	-0.354866	-0.376696	-0.82424	-0.596964	-0.284675	0.0783851	-1.76842	-0.0465566	-0.0492268	-0.166278	-0.122075	-0.6337	0.266338	0.176312	0.440286	0.0496168	-0.342744	0.0445698	-0.226007	-0.146142	-0.0768644	0.094	0.085	0.074	0.16	0.225	-0.17	0.086	-0.005	10.0666	low
GSM525859	Chibon	-0.874735	-0.843804	-0.0343673	0.0587587	-0.584242	-0.03368	0.247862	-0.334878	-0.138019	0.555442	-0.165578	0.0868058	-1.06357	-0.188818	-0.0822624	-0.721207	-0.216859	-0.53109	-1.01024	-0.144395	0.101924	-0.178288	-1.3676	0.0840469	0.361655	-0.226168	0.0141995	-0.875818	1.39751	0.523774	0.779834	0.289734	-1.04668	-2.24803	-0.866175	-0.777204	-0.638833	0.036	0.508	0.053	-0.03	-0.069	-0.222	0.907	-0.163	11.5748	low
GSM525860	Chibon	-0.405773	-0.191682	-0.237878	0.0607809	0.421263	-0.351667	0.22166	-0.262886	-0.0610828	0.172805	-0.244942	-0.432315	-0.208067	-0.090961	0.433602	0.477307	-0.219973	-0.267392	-0.635688	-0.0764947	-0.120425	0.410815	0.527923	-0.163967	-0.201651	0.0155495	-0.037167	-0.114469	-0.861968	0.948361	0.928831	0.498809	0.522119	-2.68286	0.184659	0.208103	0.252016	0.188	-0.325	-0.256	-0.095	-0.261	0.08	-0.335	-0.03	12.3943	high
GSM525861	Chibon	-0.277215	-0.163911	-0.125893	0.181265	0.550285	-0.262373	0.179442	0.00428884	-0.0414483	-0.189888	0.383329	0.307419	-0.995044	-0.101773	0.227641	0.612882	-0.108073	0.0509228	0.109131	0.11017	0.428506	-0.254564	2.04977	0.155993	0.0371524	0.235936	0.130435	1.38931	0.438264	0.70689	0.266114	0.824379	0.658736	-1.19201	0.142569	0.574342	0.625062	0.144	0.255	0.195	0.141	0.103	0.052	0.399	0.832	11.4185	low
GSM525862	Chibon	-0.937128	-0.577217	-0.399902	-0.212356	-0.293779	0.0603169	0.135792	0.118799	-0.0678607	0.0919233	-0.280328	-0.157006	-0.428172	-0.317552	0.0264995	-0.152902	-0.223974	-0.204014	-0.808196	-0.335259	0.178787	-0.311232	-0.179768	-0.198329	0.191435	0.388905	0.136687	-0.129602	0.125969	0.182325	0.148003	0.168893	-0.477141	0.227094	-0.522212	-0.281012	-0.286839	0.029	0.037	0.103	0.027	0.093	-0.19	-0.107	0.484	10.4805	low
GSM525863	Chibon	-0.871521	-0.693077	-0.198271	-0.269885	-0.332713	-0.359977	0.210481	-0.179625	-0.261818	-0.225792	0.20985	0.13269	-0.552759	-0.211807	0.0173082	-0.269685	-0.0557267	-0.183745	-0.380342	0.18589	0.0391952	-0.828983	1.63017	-0.0833531	-0.279905	1.02445	0.0904484	1.06113	0.529635	0.685975	0.230862	0.684895	-0.944366	-5.78935	-0.539866	-0.745125	-0.540822	0.168	0.368	0.059	-0.037	0.015	-0.426	0.787	-0.004	11.6606	low
GSM525864	Chibon	-0.873822	-0.63568	-0.264603	-0.0859559	-0.721102	-0.587668	-0.455814	-0.133949	-0.327895	-0.360961	-0.467916	-0.141814	-0.185226	-0.136418	-0.152326	-0.476604	0.00599613	-0.427505	-0.0195013	-0.26601	-0.292718	-0.746167	-0.505431	-0.128715	-0.523357	0.136826	-0.59966	-0.520207	-1.2848	0.924288	0.291041	0.977272	-1.21123	-2.81218	-0.886734	-1.04355	-0.893269	0.317	-0.684	-0.308	-0.255	-0.191	-0.058	-0.805	-0.333	13.9382	high
GSM525865	Chibon	-1.11509	-0.541937	-0.63684	-0.134937	-0.722554	0.150754	-0.171084	-0.209417	0.0868459	0.319986	-0.433385	-0.71708	0.165694	-0.255109	1.07556	-0.509107	0.00195833	0.165413	0.575368	-0.759918	-0.590075	-0.408511	-0.501256	0.104506	-0.916179	-0.448805	-0.43227	-0.290383	-1.15114	0.84712	0.339229	0.922956	-1.22593	-4.65699	-0.807243	-1.13784	-0.808112	0.348	-0.633	-0.177	-0.279	-0.197	-0.386	-0.545	0.079	13.0861	high
GSM525866	Chibon	-0.757818	-0.526706	-0.256792	0.0604071	-0.703902	-0.866729	-0.798573	-0.280723	0.385459	-0.69438	-0.298189	1.15671	1.32228	-0.681649	0.384005	-0.347405	0.108128	-0.00243825	0.312099	-0.137208	-0.199617	0.152675	0.797221	-0.15531	-0.506466	-0.180444	-0.550304	-1.2948	-0.654547	0.935421	0.317148	0.911325	-1.00974	-3.65749	-0.413184	-0.748952	-0.370287	-0.099	-0.883	-0.465	-0.631	-0.553	0.009	-0.553	-0.368	10.1014	low
GSM525867	Chibon	0.367724	0.738289	-0.411738	0.051177	1.63501	0.802288	0.79286	0.685726	0.466836	0.350251	0.0807471	-0.0894731	-0.224679	0.578625	1.14339	1.22824	-0.110911	0.325399	0.245376	-0.64284	-0.226366	0.850865	-0.993925	-0.0761721	0.0339341	-0.417827	-0.179383	-1.91522	-1.49624	0.914358	0.41992	0.701347	2.80833	12.3102	1.74966	2.23681	0.866019	0.198	-0.235	-0.188	-0.146	-0.024	0.451	-0.517	-0.641	10.1576	low
GSM525868	Chibon	-1.12181	-0.59141	-0.589331	-0.187346	-0.580213	0.198789	0.10544	0.00203194	-0.343521	0.154364	-0.284288	-0.452091	-0.666964	0.141827	-0.289768	-0.269302	0.051437	-0.488294	-0.31622	-0.62451	-0.562956	-0.477796	-0.0816514	0.0926257	-0.550612	-0.314793	-0.555932	-0.00854248	-0.86426	0.847095	0.915888	0.983713	-0.652305	-1.20091	-0.605683	-0.370361	-0.420523	0.662	-0.035	0.159	-0.022	0.229	0.017	-0.182	0.435	14.3889	high
GSM525869	Chibon	-1.12145	-0.615733	-0.561913	-0.0531478	-1.01697	0.25917	-0.420027	-0.393361	0.0961597	0.074665	-0.400929	-0.315466	-0.594288	0.110469	0.0432547	-0.818039	0.155143	-0.561283	0.176044	-0.864931	-0.424212	-0.169761	-1.50956	0.180458	-0.617805	-0.423748	-0.563022	-0.802047	-1.38076	0.863761	0.932431	0.937954	-1.23006	-0.716151	-0.684522	-0.690977	-0.803928	0.447	-0.092	-0.019	-0.1	0.074	-0.379	-0.389	-0.128	12.9154	high
GSM525870	Chibon	-0.987102	-0.524708	-0.513771	-0.0766964	-0.45415	0.291918	0.221931	0.0218356	-0.310803	0.376141	0.0264627	0.0702664	-0.216373	0.0379906	-0.171776	-0.314468	-0.170909	0.0981858	-0.271174	-0.74556	-0.258414	-0.486915	-0.133841	-0.200798	-0.0534064	-0.30264	-0.398103	0.47664	-0.858046	0.799598	0.416559	0.878274	-0.528666	6.63388	-0.745184	-0.649126	-0.781748	0.485	-0.093	0.109	-0.004	0.174	0.056	-0.056	0.291	12.9277	high
GSM525871	Chibon	-1.05458	-0.611453	-0.492367	-0.232323	-0.601559	0.302405	-0.302071	-0.167271	-0.213649	0.0405742	-0.215308	0.225762	0.745025	-0.0459747	-0.612581	-0.506649	-0.0412397	0.146849	0.148566	-0.358303	-0.151411	-0.963972	-0.342599	-0.0879406	-0.26692	-0.412641	-0.325362	-0.343347	-0.657569	0.121237	0.390541	0.710772	-0.882845	-0.611637	-0.7303	-1.06313	-1.04843	0.006	-0.197	0.084	-0.26	-0.082	-0.451	-1.004	0.442	15.0091	high
GSM525872	Chibon	-0.609547	-0.380475	-0.254524	-0.42818	-0.60747	-0.111651	0.214562	0.144978	0.0205759	0.0572933	-0.0281899	0.0974108	-0.181074	0.145043	-0.74799	0.185758	-0.189211	-0.0542763	0.451827	-0.402565	-0.159354	-0.329184	-1.01898	0.0931865	-0.101431	-0.420079	-0.0740565	-1.20778	0.71987	0.725949	0.428219	0.52362	-0.314221	2.76968	0.22885	0.420887	0.186296	-0.09	0.003	0.008	0.197	0.05	-0.235	-0.115	0.472	12.7938	high
GSM525873	Chibon	-1.00956	-0.558833	-0.500811	0.114426	-0.201362	-0.0738801	-0.482747	0.140344	-0.340532	0.223219	-0.153471	0.13757	-1.44148	-0.486886	0.172548	-0.480134	-0.316693	0.325884	-0.659145	-0.195434	0.0626074	2.16674e-06	-0.183943	-0.0323569	-0.258819	0.0147172	-0.293224	0.274244	-0.513562	0.272387	0.283068	0.52963	-0.61131	-4.60698	-0.504077	-0.737789	-0.342212	-0.382	-0.444	-0.446	-0.508	-0.377	-0.229	-0.325	0.14	10.6838	low
GSM525874	Chibon	0.383642	0.461171	-0.086144	0.305019	1.43431	0.568554	-0.020802	0.127892	0.295413	0.315535	0.252842	0.415832	0.157389	0.486691	1.82703	1.05854	-0.188604	0.591637	-0.0573509	0.153839	0.171937	0.896998	-0.79143	0.349646	0.153116	-0.361982	0.435019	0.687548	0.586725	0.692589	0.239438	0.831079	2.13212	8.16776	1.33782	1.5207	0.686764	0.065	0.167	0.158	0.065	0.171	0.312	0.49	-0.048	10.0125	low
GSM525875	Chibon	-0.87467	-0.416093	-0.509529	-0.356989	-0.669353	-0.24711	-0.0936755	0.188509	-0.248888	-0.0203146	-0.38937	-0.268075	0.350499	-0.245543	-0.0844203	-0.94492	0.220321	0.334569	0.330887	-0.35482	-0.449596	-0.428112	-0.302935	0.404486	-0.972897	-0.220948	-0.585463	-1.76106	-0.768397	0.0161169	0.475691	0.589383	-1.09631	-12.1252	-0.652847	-1.31203	-1.36465	-0.262	-0.44	-0.295	-0.586	-0.51	-0.783	-1.094	-0.282	11.6106	low
GSM525876	Chibon	-0.37169	-0.470825	0.110151	-0.05205	-0.0631841	-0.0656761	0.0212238	0.239235	-0.0824459	0.123715	0.124704	-0.0556185	-0.0294924	0.142974	-0.365716	0.000132746	-0.23071	0.223169	-0.0734918	0.337505	0.73372	0.390901	0.467383	0.0554152	0.595716	0.323062	0.187736	2.0419	0.52219	0.308263	0.410531	0.749152	-0.0941658	0.173557	0.0371652	0.0815133	0.372292	0.084	0.215	0.207	0.103	0.096	-0.06	0.036	0.69	10.9944	low
GSM525877	Chibon	0.537077	0.111603	0.472749	1.7257	0.880053	-0.570173	-0.122841	0.205366	0.50904	-0.826513	-0.0901541	0.32939	0.624591	0.673422	1.30245	1.19724	-0.194526	0.322206	0.590048	0.916628	0.235602	-0.316139	0.195997	0.546624	0.854455	0.3512	0.557862	0.712138	-0.0497891	0.805794	0.883917	0.929217	0.918499	0.622187	0.508204	0.353066	0.98588	-0.46	-0.184	-0.24	0.092	-0.248	0.832	0.048	0.723	10.5316	low
GSM525878	Chibon	-0.0245662	-0.278064	0.281665	3.8988e-05	0.652138	-0.23025	-0.248746	-0.462335	0.628744	-0.236626	0.604405	-0.297592	0.261211	-0.0995557	0.901298	0.48145	0.176839	-0.0227711	0.0754444	1.47145	0.348036	0.909767	-0.265359	0.678062	0.388177	3.16846	0.493115	1.31649	0.778763	0.893315	0.557626	0.863216	0.592915	-3.65003	0.469471	0.206654	1.35326	-0.125	0.286	-0.071	0.334	0.073	0.426	0.822	0.479	10.788	low
GSM525879	Chibon	-0.675864	-0.768008	0.102383	-0.289775	-0.126933	0.478289	0.2964	0.122884	-0.000105444	0.186669	-0.122042	-0.171303	-0.536147	0.363001	0.280159	0.256619	0.0299263	-0.23415	0.0658397	-0.0598925	0.479458	-0.613116	1.04982	0.30158	0.629704	-0.0161569	0.795691	1.76668	0.902799	0.272108	0.948232	0.689007	0.392152	3.43355	-0.48629	-0.43284	-0.262547	0.261	0.328	0.399	0.517	0.297	-0.378	0.145	0.895	11.8476	high
GSM525880	Chibon	-0.849358	-0.554201	-0.327952	-0.0281126	-0.35508	0.0872272	-0.295197	0.303843	0.0732262	0.2898	-0.196864	-0.591068	0.632897	-0.475009	0.320825	-0.636058	-0.0965761	0.268838	0.373655	-0.025475	-0.235227	0.586937	0.21061	-0.105023	-0.0600595	-0.240551	0.110598	0.545681	0.630382	0.0450675	0.43712	0.144037	-0.460166	-4.79993	-0.359407	-0.347103	-0.585372	-0.251	-0.194	-0.165	-0.049	-0.054	-0.486	-0.414	-0.15	11.2213	low
GSM525881	Chibon	-0.65746	-0.468998	-0.209402	-0.305927	-0.427922	0.146475	0.0196204	-0.322216	-0.0193861	-0.101018	0.00323935	0.0660485	-0.21222	-0.251463	-0.292804	-0.292257	0.0305656	0.352225	-0.197548	-0.000974233	-0.0350145	0.268298	0.507047	0.0864076	-0.200149	0.0393209	-0.426254	1.21056	0.589705	0.345525	0.769478	0.870216	-0.799303	-3.29484	-0.374962	-0.451709	0.0025705	-0.005	0.449	0.009	-0.08	-0.004	-0.263	0.333	0.001	12.9001	high
GSM525882	Chibon	-0.0855201	0.30377	-0.432545	0.648137	1.44527	0.534122	-0.426483	-0.516061	0.393628	0.115774	0.560226	0.57828	-0.328502	0.370303	2.92172	1.41562	0.137293	1.12178	0.688579	-0.11674	-0.159267	1.23823	0.041516	0.185936	-0.157355	0.310216	-0.139358	-2.10722	-0.195512	0.205143	0.231653	0.685265	2.58398	6.84466	2.06387	1.55963	0.939634	-0.277	-0.386	-0.053	-0.074	0.142	0.045	-0.781	-0.828	11.0026	low
GSM525883	Chibon	-0.673607	-0.572559	-0.112276	-0.547236	-0.656433	-0.25503	-0.150155	-0.0253679	-0.0211911	-0.0576683	0.00033164	-0.511634	-0.301508	0.0393387	0.250643	-0.201806	0.0669197	-0.0209389	-0.0887589	0.422555	-0.537687	-0.835669	-0.699576	0.434796	-0.0374143	-0.54383	-0.00521842	0.0340174	0.63108	0.380728	0.886243	0.353951	-1.06641	-8.06794	-0.698559	-1.02519	-0.287852	0.054	0.394	0.049	0.542	0.25	-0.363	0.529	0.143	10.5091	low
GSM525884	Chibon	-0.431157	-0.529164	0.108896	-0.128963	-0.181033	-0.104295	-0.439574	0.0623353	0.0291284	0.192587	-0.110863	0.62146	-0.534071	-0.113427	-0.151062	-0.249829	-0.367761	0.0829961	-0.480645	0.483235	0.310931	0.322065	-1.22356	-0.15436	0.0968208	0.376878	0.144233	-1.16995	0.636059	0.357055	0.121716	0.270744	-0.175616	4.8182	-0.180315	-0.0655246	0.261983	-0.276	-0.272	-0.106	-0.166	-0.158	-0.024	0.445	-0.251	10.4897	low
GSM525885	Chibon	-0.649553	-0.50009	-0.166071	-0.348601	-0.185036	0.502117	-0.00138462	0.165294	-0.131476	0.457378	-0.22305	0.36755	-0.280743	0.189725	-0.447113	0.00772753	-0.10543	-0.150768	-0.0482581	-0.283146	0.013459	0.27249	-0.628598	0.139976	0.228976	0.381923	0.0538665	0.361255	-0.28802	0.166415	0.342349	0.191032	0.366801	6.05587	0.140185	0.125604	0.221375	0.171	-0.071	0.334	0.278	0.558	0.009	-0.04	-0.169	9.5588	low
GSM525886	Chibon	-0.937061	-0.410244	-0.585352	-0.566015	-0.570052	-0.0178917	0.072894	0.32592	0.347982	0.366559	-0.25307	-0.261894	-0.743793	0.51201	-0.175799	-0.0758326	0.159485	-0.119832	-0.658895	0.305947	-0.358953	0.291854	-0.753853	0.226501	-0.243576	-0.369086	-0.160293	0.340448	0.916218	0.899438	0.247075	0.773921	-1.27889	3.39565	0.0050423	-0.0377885	0.547653	-0.196	0.197	0.034	0.274	0.047	-0.078	0.844	-0.503	11.3153	low
GSM525887	Chibon	-1.02278	-0.387976	-0.705335	-0.205358	-0.332729	0.778876	0.176576	-0.157749	-0.311831	0.316958	0.0428476	0.800517	-0.5403	0.403735	0.0972619	-0.136981	-0.0293123	-0.323933	-0.0564481	-0.471457	-0.347848	0.44323	-1.12753	0.162404	-0.260153	-0.0471005	-0.331866	-1.05741	-0.831345	0.112772	0.138764	0.0756746	-0.482831	5.61863	-0.250861	-0.23533	-0.313708	0.169	0.286	0.186	0.156	0.415	-0.478	0.201	-0.358	10.644	low
GSM525888	Chibon	-0.835278	-0.531129	-0.337943	-0.30044	-0.65526	0.297941	-0.353176	0.0645114	-0.0828029	0.259417	-0.270962	0.199902	0.551915	-0.131835	-0.354458	-0.194832	-0.135837	0.243378	0.0610389	-0.157381	-0.0649048	-0.520231	-0.689138	-0.19035	-0.03431	-0.0836485	-0.311657	0.0727941	0.108979	0.132016	0.121716	0.412531	-0.54854	-1.57199	-0.434997	-0.771142	-0.60683	-0.002	0.029	0.052	-0.033	0.048	-0.024	-0.124	0.035	9.74272	low
GSM525889	Chibon	-0.878605	-0.371035	-0.563967	-0.316678	-0.415534	-0.399225	-0.419286	-0.0535506	0.0358646	0.25239	-0.102045	0.327531	0.786554	-0.0932349	-0.534269	-0.667703	0.0416035	0.0661442	0.0680081	0.0965872	-0.190125	-0.433205	-0.355125	-0.14826	-0.379478	-0.390683	-0.131303	0.436917	0.0585978	0.166284	0.121716	0.260232	-0.883265	0.549451	-0.255532	-0.489974	-0.586896	-0.011	0.094	0.005	-0.103	-0.128	-0.208	0.651	0.025	11.0169	low
GSM525890	Chibon	-0.519266	-0.414576	-0.116322	-0.171961	0.128737	0.155005	0.162088	0.369369	-0.144959	-0.238186	0.237937	-0.0543693	0.670273	-0.0275371	0.18647	0.299236	-0.176949	0.245788	0.260161	0.226394	-0.125107	-0.702978	0.317077	-0.132093	0.201874	0.615697	0.405022	0.217498	-0.33728	0.215623	0.688498	0.661885	0.169575	-0.778454	-0.247503	-0.25158	-0.148377	0.149	0.471	0.113	0.135	0.152	-0.236	0.158	0.683	10.8412	low
GSM525891	Chibon	-0.135004	-0.275296	0.155881	0.0653594	0.455603	0.59951	0.336358	0.0272655	0.365635	0.0953327	0.069453	-0.204651	-0.633741	0.735621	-0.760958	0.732737	-0.0680873	0.303786	-0.141186	0.827605	0.360086	0.144535	1.12915	0.541577	0.44706	0.0779981	1.09175	1.37513	0.0610184	0.604873	0.816448	0.789518	0.594719	2.73919	0.79433	0.903879	0.777169	0.117	0.132	0.337	0.569	0.337	0.337	-0.308	0.223	11.2111	low
GSM525892	Chibon	0.228874	0.288736	-0.0665131	-0.236238	1.1691	0.461945	-0.298559	0.30945	0.307237	0.171822	0.0455445	0.83761	0.873765	0.264554	-0.205294	1.16582	-0.0413871	0.420667	0.288614	-0.235508	0.0427696	0.818978	-0.234045	-0.0485838	0.251354	0.315968	0.245573	-1.61352	0.276778	0.517118	0.234202	0.48036	2.23488	6.89742	1.82333	1.57936	1.29377	-0.17	-0.105	0.066	0.121	0.298	0.241	-0.166	-0.266	10.0666	low
GSM525893	Chibon	0.346493	0.586788	-0.266994	0.843125	1.77747	0.94644	0.356078	0.069654	0.288673	0.723801	0.618023	0.487523	-1.6076	0.474823	0.453766	0.949559	-0.32424	0.221716	0.370865	0.0463036	0.289175	1.69906	0.200172	0.0675688	0.0769282	-0.283293	0.0212822	0.599591	0.861836	0.496511	0.370274	0.172259	2.16552	7.88633	1.61882	1.8912	1.28284	0.045	0.044	0.026	0.047	0.244	0.393	-0.229	-0.248	9.72024	low
GSM525894	Chibon	-0.582736	-0.713424	0.14521	-0.26911	-0.677991	0.0133108	-0.204506	0.193548	0.339339	0.00388745	-0.178392	0.317521	-0.0253394	-0.152509	-0.031526	-0.108025	-0.0952312	0.243953	0.0736668	0.208336	0.0169459	-0.0776564	-0.112965	-0.0465885	0.489036	-0.421596	0.951667	0.435026	0.651929	0.487226	0.39042	0.569863	-0.730685	0.919606	-0.386868	-0.349302	-0.0566343	0.004	-0.276	0.128	0.1	0.176	-0.289	-0.114	0.314	11.9386	high
GSM525895	Chibon	-0.587605	-0.133098	-0.505008	-0.00326949	0.626977	0.0613171	0.147584	0.136792	-0.000224335	-0.114896	0.321332	-0.22102	-1.45809	0.0914612	0.29694	0.563225	-0.00498209	-0.332074	0.278392	0.00977696	0.202348	0.0316715	-0.570146	0.20919	-0.0277034	0.497518	-0.180864	1.00438	0.331973	0.859196	0.737416	0.7677	0.781907	-0.836444	0.265227	0.361918	0.00701325	0.274	0.594	0.13	0.054	0.04	-0.065	0.707	0.129	12.8684	high
GSM525896	Chibon	-0.833736	-0.434768	-0.443298	-0.215966	-0.398611	0.0616422	-0.328588	-0.233057	-0.205153	0.317892	-0.436754	-0.232355	-0.0481804	-0.23135	-0.323565	-0.611594	0.0226475	-0.114686	-0.0117977	-0.596024	-0.434947	-0.644975	-0.695401	-0.0933688	-0.093522	-0.432827	-0.286148	-1.63149	0.230312	0.0150928	0.121716	0.0265626	-0.418158	0.253705	-0.585096	-0.543705	-0.498608	-0.175	-0.116	-0.036	-0.095	-0.01	-0.397	-0.687	-0.261	12.6406	high
GSM525897	Chibon	-0.782024	-0.319106	-0.514353	-0.385658	-0.470602	0.55973	0.357465	0.210375	-0.0527822	0.321338	-0.0364514	-0.329609	-0.561065	0.46684	-1.0311	-0.739911	0.109045	-0.911291	-0.353481	-0.298468	-0.219411	-0.0134052	-0.0774763	0.0710119	-0.0391024	-0.378341	-0.148906	0.0378005	1.00674	0.245053	0.321815	0.035545	-1.2076	0.820445	-0.464249	-0.563377	-0.0862781	0.003	0.39	0.269	0.531	0.32	0.136	0.992	-0.78	10.3149	low
GSM525898	Chibon	-0.206607	-0.535857	0.365833	-0.046612	-0.233507	-0.412758	-0.586697	-0.179139	0.716912	-0.117568	0.0795094	0.813214	0.190612	0.35926	-0.000628485	0.484632	0.500158	0.419109	0.568326	0.99029	0.434207	-0.117569	0.173034	0.638473	0.519404	1.47502	0.413459	0.348015	0.0950086	0.822473	0.610033	0.829609	-0.323505	-1.11601	0.0968661	0.0520939	0.842549	-0.265	0.386	0.037	0.441	0.112	0.557	0.991	-0.198	10.5724	low
GSM525899	Chibon	-0.338249	-0.534537	0.218098	-0.255141	-0.262138	-0.435837	-0.233701	-0.110072	0.286577	-0.0901153	-0.186007	0.578507	0.898683	0.0566284	-0.0598692	-0.198497	-0.106798	0.208867	0.0924872	1.12576	0.318721	-0.115135	-0.605635	0.361304	0.639574	0.427181	0.338549	-0.870143	1.54527	0.649673	0.961079	0.558685	-0.46995	-6.74635	-0.0218412	0.11107	0.791891	-0.334	-0.173	-0.012	0.183	-0.121	0.473	-0.007	0.33	10.9311	low
GSM525900	Chibon	-0.0644929	0.148323	-0.236462	1.07371	0.895964	0.406654	0.104705	0.183951	0.210041	0.623315	0.0329849	-0.130962	-0.224679	0.0537884	-0.189276	0.340068	-0.108077	-0.0752599	-0.265821	-0.00995201	0.104683	0.131167	-0.595197	0.138886	0.256492	0.0334092	0.281119	-0.00570516	0.391568	0.248871	0.305543	0.173139	1.4597	5.97935	0.962294	1.07284	0.911794	0.005	-0.237	0.011	0.036	0.131	0.217	-0.378	0.185	11.3091	low
GSM525901	Chibon	-0.634154	-0.697577	0.0704702	-0.237876	-0.570192	-0.267788	0.0320995	0.0823272	-0.0883389	-0.0401218	-0.126625	0.237624	-0.687728	0.0191306	-0.669156	-0.404669	-0.0404992	-0.542581	-0.17991	-0.313441	0.258154	0.226861	-0.701664	0.170331	0.295719	-0.555314	0.239268	0.734836	0.190978	0.319967	0.371218	0.437354	-0.6763	-0.427982	-0.734566	-0.512843	0.0254566	0.068	0.294	0.196	0.241	0.205	-0.295	-0.086	0.153	10.8994	low
GSM525902	Chibon	-0.292226	-0.0514077	-0.267575	0.0939222	-0.18371	-0.246396	0.239611	0.0411867	0.0926027	-0.607871	-0.0114134	1.59255	-0.837233	-0.102184	-0.158685	-0.149258	-0.358202	0.247931	0.077243	-0.207812	0.229932	0.0697457	-1.14423	-0.0615761	-0.538997	-0.49436	-0.604094	-0.346184	-0.754899	0.372675	0.795751	0.960083	-0.50315	-8.95423	0.0483295	-0.206877	-0.247573	-0.397	-0.245	-0.185	-0.255	-0.276	-0.382	-0.82	-0.213	10.4539	low
GSM525903	Chibon	-0.313216	-0.2874	-0.028685	0.0217387	0.241165	-0.147797	-0.354677	0.357956	0.142338	0.193651	-0.0097533	0.44043	-1.09471	-0.0531978	0.391434	-0.0527341	-0.107182	0.700848	-0.554438	0.589	0.284528	0.341372	-0.622336	0.114745	0.113696	0.0351703	0.119738	0.305455	0.646117	0.623297	0.273844	0.581865	0.285194	-0.157185	-0.0953326	0.123538	-0.0828886	-0.206	0.006	-0.131	-0.095	-0.159	-0.108	-0.12	0.245	10.6123	low
GSM525904	Chibon	-0.33053	-0.559596	0.254517	0.0676325	-0.422555	-0.540661	-0.494527	0.301344	0.138117	-0.373335	-0.337353	0.76404	-1.07187	-0.15068	1.07809	0.0983621	-0.236295	0.866955	-0.12645	-0.0544519	0.673518	-0.286001	-1.0983	-0.195057	0.190769	-0.0978296	0.159813	1.01195	0.146324	0.30011	0.505786	0.786581	-0.439457	2.45372	-0.413377	-0.189894	-0.442607	-0.286	-0.357	-0.192	-0.164	-0.418	-0.257	-0.703	0.697	12.8439	high
GSM525905	Chibon	-1.19931	-0.647614	-0.612994	-0.107357	-0.789999	-0.19327	-0.254071	-0.270928	-0.253632	0.121929	-0.576733	-0.107013	-0.436477	-0.320318	-0.352872	-0.697365	0.014866	-0.477608	-0.439365	-0.297127	-0.450743	-1.02397	-1.0649	-0.0803167	-0.67869	-0.581061	-0.483481	-1.36951	-1.10785	0.85778	0.491031	0.630016	-0.697525	-2.14781	-0.782819	-0.706606	-0.643116	0.464	-0.292	-0.223	-0.203	-0.1	-0.388	-0.504	0.049	13.7359	high
GSM525906	Chibon	-0.566377	-0.666498	0.111245	-0.183518	0.0323337	0.104456	0.241526	0.317701	-0.112007	0.138342	-0.153126	-0.159582	-0.216373	-0.134237	-0.351263	0.219351	-0.153834	-0.173515	-0.377985	0.0290441	0.24247	-0.338353	0.198085	-0.04206	0.699621	0.0909631	0.357129	1.90571	0.465721	0.325636	0.265138	0.583228	0.124432	2.09813	-0.0749388	0.0432512	0.265318	0.266	0.306	0.255	0.084	0.118	-0.201	0.121	0.957	12.2104	high
GSM525907	Chibon	-0.722326	-0.734447	0.0134673	-0.198515	-0.276621	0.106676	0.0802958	-0.121267	-0.0851415	0.297948	-0.376446	0.0912372	-1.28159	-0.177983	0.0510008	-0.58707	-0.31055	-0.222961	-0.449884	-0.433539	-0.017054	-0.576841	-1.36343	-0.0879942	0.259757	-0.302581	0.200652	0.0302343	-0.00567705	0.168694	0.348242	0.0702749	-0.174184	-0.311105	-0.4629	-0.27079	-0.184812	0.008	-0.035	-0.001	-0.074	-0.09	-0.346	-0.49	0.234	11.8803	high
GSM525908	Chibon	0.378873	0.166553	0.235912	0.947377	1.59633	0.304755	0.268918	0.27376	0.498248	0.312254	0.339725	0.364196	-1.44979	0.201538	0.356443	0.79897	-0.398727	-0.0166549	-0.433841	1.57094	0.434478	0.830904	-0.115053	0.20357	0.445639	0.280831	0.672494	0.187233	0.269727	0.608836	0.177136	0.186513	1.4919	5.49884	1.12655	1.56623	1.57973	0.043	0.2	0.03	0.115	0.082	0.058	0.047	0.401	10.9045	low
GSM525909	Chibon	-1.08322	-0.681673	-0.446164	-0.611671	-0.859131	-0.00453508	-0.0303656	0.374593	-0.581255	0.260588	-0.219345	-0.759388	-0.779092	-0.140219	-0.44456	-0.457147	-0.136693	-0.198376	-0.8952	-0.882146	-0.515526	-0.737357	-0.826919	-0.194381	-0.358947	-0.578587	-0.295084	0.596753	0.0908007	0.201057	0.366418	0.235851	-1.22134	-0.858186	-1.00802	-0.896898	-1.32821	-0.264	0.049	0.029	-0.182	-0.113	-0.605	-0.801	0.123	14.4124	high
GSM525910	Chibon	-1.00119	-0.803367	-0.219803	-0.45708	-0.923291	-0.0633133	-0.00282673	0.218013	-0.211278	0.278219	-0.110443	-0.972501	-0.272438	-0.120794	-1.37793	-0.570748	-0.155958	-0.385712	-0.463106	-0.953637	-0.453437	-1.06985	-0.718364	-0.387572	0.153853	-0.563072	-0.0757965	-0.468189	0.167185	0.254875	0.879645	0.2932	-1.18628	-0.734926	-0.883846	-0.98036	-0.776279	0.05	0.064	0.151	0.139	-0.01	-0.322	-0.23	0.654	12.0786	high
GSM525911	Chibon	-1.1216	-0.714475	-0.452357	-0.432314	-0.978426	0.128086	-0.421692	0.103343	-0.0597867	-0.0949262	-0.104069	-0.459767	-0.280743	0.295296	-0.206579	-0.20698	-0.0710331	-0.119175	-0.33554	-0.806044	-0.0751995	-0.215684	-1.63064	0.051199	-0.347261	-0.503058	-0.529118	-2.10911	-0.171522	0.172907	0.370631	0.359769	-1.10714	3.49673	-0.756162	-0.970287	-1.10858	0.068	-0.075	0.293	0.102	0.092	0.183	-0.46	0.657	14.1794	high
GSM525912	Chibon	-0.981669	-0.664317	-0.352614	-0.490531	-0.671977	0.492234	0.0639385	-0.250858	-0.104788	0.110812	-0.0580695	-0.00547238	-0.392872	0.0960189	0.0421287	0.0721164	0.0222545	-0.127917	-0.487486	0.0293311	-0.194109	-0.377173	0.162596	0.133729	0.0290696	-0.350718	-0.015318	0.645934	1.1389	0.242267	0.322104	0.20088	-0.717424	0.46123	-0.574454	-0.363614	-0.321602	0.144	0.363	0.175	0.26	0.381	-0.172	0.599	-0.034	10.7063	low
GSM525913	Chibon	-0.380021	-0.660162	0.311268	-0.16519	-0.0179996	-0.583585	-0.223572	-0.196548	-0.232921	-0.667821	-0.234463	-0.35912	-1.37919	-0.254434	0.394281	-0.0641176	-0.16702	-0.0137788	-0.405851	0.782473	0.658693	-0.368351	-1.68283	0.0903172	0.350777	-0.382025	0.00436566	0.595808	-0.662157	0.693532	0.83017	0.972159	-0.353492	-5.1412	-0.568761	-0.391062	-0.403818	-0.405	-0.095	-0.288	-0.201	-0.335	-0.587	-0.179	-0.441	12.2277	high
GSM525914	Chibon	-0.454334	-0.296566	-0.175298	-0.0685011	-0.419458	-0.117309	0.0791538	-0.163806	-0.0948001	-0.506	0.243483	0.117585	-0.67527	0.298421	-0.358045	0.368529	0.764196	0.114393	-0.343011	-0.206237	-0.283028	-0.679242	0.0102022	0.273593	-0.357529	-0.408503	-0.22613	-1.48395	-0.735747	0.456858	0.506169	0.625877	0.296889	-4.25083	-0.295299	-0.475532	-0.683835	-0.002	-0.152	0.113	0.05	0.043	0.486	-0.57	-0.316	9.98183	low
GSM525915	Chibon	-0.211964	-0.329045	0.13009	0.134193	0.342632	-0.495797	0.00139773	0.147547	0.317298	-0.369196	0.178624	-0.458395	-0.28282	0.075512	0.415817	0.254936	-0.103641	0.124013	0.255861	1.06977	0.330849	0.606488	-0.469942	0.397046	0.30912	0.266131	0.242057	1.40539	0.602957	0.9076	0.59096	0.981347	0.0840819	-1.02687	0.27738	0.241567	0.903866	-0.15	0.167	-0.086	0.185	-0.135	0.272	0.988	0.329	12.6222	high
GSM525916	Chibon	-0.830514	-0.599754	-0.2564	-0.0762415	-0.481232	0.133987	-0.221936	0.126844	0.0348981	0.222555	-0.526976	1.01666	-1.17154	-0.288741	0.515755	-0.327253	-0.0955708	0.468883	-0.907362	0.511201	0.0880815	0.223935	-1.21103	0.0589271	-0.358398	-0.10397	0.267487	0.462453	0.292321	0.407317	0.181664	0.468852	-0.310976	-0.67313	-0.216563	-0.370812	-0.0686252	-0.34	-0.183	-0.197	-0.255	-0.303	-0.284	0.252	-0.278	10.6705	low
GSM525917	Chibon	-0.893795	-0.668048	-0.25083	-0.215148	-0.24882	-0.150043	-0.341616	0.248015	-0.180818	0.209399	-0.277636	0.94502	-0.239214	-0.290662	-0.00169591	-0.279348	-0.102921	0.229157	-0.545854	0.089264	0.292559	-0.415869	-0.820656	0.192529	0.290719	0.017925	0.150583	1.15098	0.189294	0.205117	0.178201	0.649073	-0.225185	-2.0484	-0.3713	-0.443433	-0.244585	-0.047	0.009	0.054	-0.054	-0.044	-0.34	0.017	0.746	11.5391	low
GSM525918	Chibon	0.0662575	0.406789	-0.378368	0.390717	1.95487	0.305853	0.713883	0.193957	0.228109	0.394863	0.460432	-0.668035	-0.980509	0.617324	0.0680374	1.62491	-0.377227	-0.237636	0.400661	0.607253	0.0856961	0.628028	-0.628598	-0.0186154	-0.0425659	-0.191156	-0.0361586	0.361255	0.0416693	0.790462	0.167606	0.62261	2.08208	5.31935	1.5623	1.95605	0.700339	0.083	0.266	0.15	0.224	0.156	0.421	0.507	-0.085	11.0833	low
GSM525919	Chibon	-0.324033	-0.187219	-0.152016	0.636628	0.0918504	0.474517	-0.339413	0.372598	-0.0201181	-0.00533835	-0.199785	0.12831	-0.99712	-0.118866	-0.234131	0.217057	-0.275357	0.828655	0.762898	-0.780071	-0.218461	0.189799	-1.11918	-0.197645	-0.233192	-0.353161	-0.180416	-0.907974	-0.307739	0.00752121	0.725079	0.292338	0.599949	2.32079	0.849933	0.356983	0.782799	-0.422	-0.781	-0.363	-0.425	-0.153	-0.392	-1.103	-0.681	11.2611	low
GSM525920	Chibon	0.452306	0.426138	0.0290755	1.47155	1.43397	-0.184949	-0.102341	0.300297	0.338539	-0.10549	0.167471	0.192027	0.171924	0.0458325	1.1494	0.925787	-0.164481	0.247639	0.450601	0.927201	0.188843	1.41064	0.333778	-0.248979	0.281938	0.878177	0.184269	0.489881	0.593531	0.645087	0.121716	0.501459	1.87741	3.71972	1.54241	1.48439	1.77318	-0.412	-0.122	-0.233	-0.137	-0.128	0.518	0.386	-0.008	10.2925	low
GSM525921	Chibon	-0.870688	-0.557028	-0.348511	-0.218257	-0.554928	0.146541	0.551837	0.108394	-0.0180158	0.0236072	0.101861	-0.397532	-0.461395	0.0918142	-0.43288	-0.386575	-0.266127	-0.658435	-1.11932	0.00397832	-0.154904	-0.52999	-0.80813	-0.019525	-0.131114	-0.204523	-0.143388	-0.267685	0.642005	0.722364	0.407067	0.180845	-0.744166	-2.9628	-0.524356	-0.595581	-0.175025	-0.049	0.289	-0.076	-0.021	-0.205	-0.537	0.697	-0.158	11.1518	low
GSM525922	Chibon	-0.615949	-0.718469	0.113912	-0.211989	-0.317478	0.477551	-0.272171	0.0850572	-0.0443765	0.475269	0.0840494	0.0402833	-0.650352	-0.105809	-0.434065	-0.305768	-0.280351	0.137648	-0.1774	-0.0641337	0.236649	-0.412467	-0.620248	-0.0767154	0.571598	0.0679177	0.54837	-0.963775	-0.107267	0.0783816	0.141099	0.131578	-0.3182	1.63278	-0.1205	-0.0351834	0.50873	0.048	-0.079	0.244	0.142	0.304	0.01	-0.366	0.067	10.0677	low
GSM525923	Chibon	-0.774794	-0.527015	-0.275309	-0.24913	-0.212383	0.144427	0.306025	0.115119	0.113668	0.207229	-0.030178	-0.05143	-0.228832	-0.214679	0.188741	-0.292481	0.0099327	0.216571	-0.217294	-0.637809	-0.0299749	-0.0962907	-0.083739	-0.0828146	0.271546	0.199944	0.153099	0.0463125	0.189647	0.0219116	0.22266	0.263117	-0.427379	-0.915613	-0.312366	-0.0723053	-0.119148	0.176	0.249	0.287	0.294	0.329	0.084	0.022	0.541	10.8912	low
GSM525924	Chibon	-0.557165	-0.84022	0.314505	-0.190895	-0.538603	-0.481468	-0.811758	-0.0448932	-0.376019	-0.168981	-0.199551	0.460598	0.522845	-0.486153	0.292314	-0.5636	-0.030512	0.472292	-0.0104441	0.556485	0.299659	-0.51932	0.544624	-0.087832	0.0271889	-0.130921	0.618327	0.945744	-0.41654	0.0859231	0.121716	0.667076	-0.757681	-6.89672	-0.628592	-0.625702	-0.659204	-0.387	-0.312	-0.12	-0.19	-0.2	-0.1	-0.35	0.197	10.8739	low
GSM525925	Chibon	-0.756846	-0.253183	-0.559626	0.107681	-0.48358	-0.316032	0.112985	0.182207	-0.33172	-0.703683	-0.358378	0.595708	-1.04073	-0.253321	-0.292224	-0.0354635	0.197937	0.619034	-0.193475	-0.690904	-0.0472261	-0.430977	-0.987663	0.15006	-0.733267	-0.603398	-0.741407	-0.401985	-1.00415	0.389138	0.773686	0.914097	-0.983626	-10.5922	-0.883118	-1.10512	-1.21958	-0.208	-0.753	-0.43	-0.503	-0.523	-0.798	-0.903	-0.719	11.7128	high
GSM525926	Chibon	-0.400104	-0.405207	0.00567001	-0.31844	-0.245796	-0.337988	0.298399	-0.260658	-0.204311	-0.401041	-0.0483865	-0.243725	-0.685652	0.179693	-0.309074	-0.203804	-0.1185	-0.541947	-0.998122	-0.219873	-0.0443327	-0.348711	-1.57427	0.0845833	-0.145873	1.09237	-0.328394	0.207094	0.992475	0.78904	0.714684	0.454547	-0.526246	-7.20019	-0.64022	-0.609234	-0.471347	0.03	0.272	-0.087	-0.127	-0.244	-0.545	0.986	-0.49	11.7526	high
GSM525927	Chibon	0.272026	0.364639	-0.102902	0.962772	1.6089	0.319795	0.451859	0.134044	0.597157	0.0895082	0.355672	0.363035	-0.606747	0.290007	0.859904	1.09367	-0.377612	0.0467429	-0.38591	1.71553	0.136315	1.163	-0.768466	0.0895537	0.281624	0.0810635	0.206024	-0.140951	0.274396	0.726836	0.631413	0.252039	1.38841	5.69397	0.593892	1.10045	1.15649	-0.134	0.149	-0.013	-0.037	0	0.45	0.06	-0.19	10.3108	low
GSM525928	Chibon	-0.766798	-0.710215	-0.0628708	-0.130437	-0.336029	0.2058	0.0341195	-0.0864006	-0.270158	0.404204	-0.261858	0.415577	-0.457242	-0.203125	-0.242233	-0.583547	-0.471593	-0.445075	-0.890707	-0.26246	0.0791368	-0.398741	-1.24652	-0.168937	0.29715	0.0137499	0.0879441	-0.367937	0.0479582	0.0415194	0.30583	0.0995237	-0.690305	0.106428	-0.660565	-0.516477	0.0386507	0.013	-0.199	0.233	0.11	0.203	-0.229	-0.571	0.02	9.90621	low
GSM525929	Chibon	-0.784161	-0.473674	-0.344986	0.0308608	-0.688106	-0.142944	0.187095	-0.212685	-0.410698	-0.165647	-0.484361	-0.910488	-0.758328	-0.319962	-0.231761	-0.701783	-0.0507756	-0.79441	-0.469137	-0.444399	-0.469709	-0.210035	-1.73293	-0.0494418	-0.489095	-0.104545	-0.53741	-1.90766	-0.826649	0.848751	0.433743	0.654736	-0.764457	-6.81121	-0.728333	-0.901729	-0.785924	0.359	-0.354	-0.057	-0.225	0.014	-0.143	-0.361	-0.164	10.4682	low
GSM525930	Chibon	-0.425869	-0.159515	-0.295949	0.228649	0.76511	0.047243	0.127984	0.138573	0.0993473	0.0815954	0.318104	-0.0709851	-0.708493	0.0331457	0.07961	0.53511	0.0180889	-0.264028	-0.245769	0.53974	0.593872	0.735603	0.189734	-0.157316	0.173186	-0.129083	-0.0242648	0.304509	0.294465	0.780705	0.16369	0.732996	0.738567	1.4339	0.680684	0.887897	0.871539	0.186	0.135	0.112	0.133	0.101	-0.001	-0.231	0.858	12.9318	high
GSM525931	Chibon	-0.785405	-0.581979	-0.226029	-0.159032	-0.387817	0.0412108	0.288012	0.236312	-0.359287	-0.368905	0.17578	0.0418993	-0.565218	-0.241613	-0.735222	-0.434273	-0.217744	-0.407063	-0.0464408	-0.818774	-0.188781	-0.909914	-0.223607	-0.39966	-0.365016	-0.402257	-0.341426	0.209931	-0.449546	0.241379	0.121716	0.864365	-1.04546	-8.72486	-0.701685	-0.400237	-0.535329	-0.216	-0.163	-0.041	-0.302	-0.318	-0.613	-0.717	0.483	14.3388	high
GSM525932	Chibon	-0.594095	-0.0822406	-0.568727	-0.290794	-0.0890879	0.142656	0.564825	0.496663	-0.377646	-0.428836	-0.119227	-0.765569	-1.0428	-0.025312	0.300129	-0.323052	0.317372	-0.0838669	-0.397165	-0.806472	-0.356212	0.32454	-0.300848	0.703764	-0.512426	-0.512468	-0.559582	1.00627	0.286643	0.0312386	0.554557	0.680916	0.0560165	-4.75513	-0.649999	-0.524043	-0.66852	0.027	-0.069	0.059	-0.222	-0.234	-0.432	-0.819	0.015	11.9488	high
GSM525933	Chibon	-0.118597	-0.667134	0.609485	-0.198097	-0.281474	-0.0165599	0.464833	0.509172	0.153346	0.119356	-0.157009	0.0179117	-1.39995	0.0859127	-0.21714	0.183746	-0.122623	-0.456002	-0.55253	0.432015	0.422754	0.0709854	-0.165155	0.382018	1.08158	-0.38591	1.83659	0.855896	0.625317	0.568428	0.543593	0.694604	0.231928	4.61441	0.255996	0.478761	0.727529	0.058	0.152	0.212	0.239	0.174	0.58	0.207	0.068	11.3991	low
GSM525934	Chibon	-0.0646738	-0.400053	0.372644	-0.081047	0.0202168	0.178365	0.602939	0.418007	-0.10609	0.0379646	0.0276913	0.593529	-0.54653	0.357624	-0.0375852	0.277134	-0.33063	-0.01861	0.234811	-0.0478905	0.823578	0.558098	-0.891634	0.238714	0.47264	-0.382236	0.914299	-0.78124	-0.492667	0.841593	0.88464	0.61029	0.306961	5.56082	0.282376	0.488961	0.238617	0.093	0.02	0.262	0.349	0.151	0.636	-0.288	-0.441	9.68857	low
GSM525935	Chibon	-1.22397	-0.876194	-0.386422	-0.101218	-0.989483	0.305336	-0.0332433	-0.283433	-0.320676	0.400707	-0.38303	-1.029	0.122089	-0.101339	-0.0860899	-0.79993	-0.204606	-0.395347	-0.171397	-0.794273	-0.135683	-0.792	-1.37595	-0.159545	0.050228	-0.418227	-0.431782	-0.135276	0.424807	0.0164357	0.957574	0.0773534	-1.07687	-3.87697	-1.14278	-1.13856	-1.07396	0.062	-0.003	0.189	0.086	0.033	-0.604	-0.339	-0.147	11.8906	high
GSM525936	Chibon	-0.650803	-0.449776	-0.223363	-0.408463	-0.875637	0.0989603	0.0347842	0.0348807	-0.382526	0.644734	-0.444199	-0.351787	-0.70434	-0.0305519	-0.882325	-0.408981	-0.0803564	0.0386289	0.0124738	-0.720522	-0.336326	-0.770905	-1.12336	0.19085	-0.318051	-0.428997	-0.295765	-1.53408	-0.152082	0.28884	0.244061	0.294319	-0.880544	3.46019	-0.648338	-0.517761	-0.597998	0.002	-0.066	0.141	0.155	0.177	-0.098	-0.326	-0.388	10.788	low
GSM525937	Chibon	-0.82517	-0.457001	-0.409077	-0.123024	-0.255797	-0.138473	-0.33244	0.058838	-0.370632	-0.308431	-0.391484	-0.335368	-0.656582	-0.281498	0.708772	-0.197955	0.262502	-0.0494531	-0.372161	-0.228809	-0.1213	-0.774036	-1.0816	0.0694415	-0.659837	-0.383487	-0.422845	0.129541	-1.1146	0.918022	0.367617	0.982418	-0.159486	1.54773	-0.382695	-0.454022	-0.299099	0.384	-0.375	-0.275	-0.295	-0.199	-0.023	-0.146	0.277	12.5149	high
GSM525938	Chibon	-0.772314	-0.475555	-0.329733	-0.286518	-0.511787	0.205542	0.0872868	-0.0465876	-0.0206661	-0.357964	0.165264	-0.195423	-0.122933	0.0072865	-0.391091	1.03948	0.459064	1.08717	-0.359221	-0.615349	0.0740011	-0.41468	1.24605	-0.0910503	-0.386874	-0.571835	-0.213991	-0.228908	-0.734792	0.0715751	0.14076	0.64759	1.2857	1.70364	-0.0634762	-0.670342	-1.00596	0.088	-0.083	0.299	0.07	0.168	0.006	-0.594	0.131	12.0224	high
GSM525939	Chibon	-0.834782	-0.465636	-0.410162	0.261561	-0.231526	0.0441702	0.189844	-0.244764	-0.178242	0.0103581	-0.290462	-0.603795	-0.602594	-0.0451089	0.0848898	0.135709	-0.143665	-0.685784	-0.126261	-0.351861	-0.247545	0.363055	0.920389	-0.0432637	-0.506221	-0.0224511	-0.475365	-0.556146	-0.753311	0.951133	0.767865	0.765734	-0.0978563	-0.0568319	-0.295243	-0.277107	-0.070469	0.496	-0.155	-0.06	-0.04	0.1	-0.055	-0.052	0.048	13.3323	high
GSM525940	Chibon	-0.809141	-0.392536	-0.462895	-0.323609	-0.479252	0.0197557	-0.138851	0.237604	-0.113083	0.403773	-0.26693	-0.103354	-0.205991	-0.00673589	0.0815427	-0.379261	0.0485247	-0.3537	-0.26276	0.453035	-0.124169	-0.660095	-1.02733	-0.0106371	-0.380816	-0.477607	-0.30712	-0.320648	0.14636	0.588606	0.213455	0.189104	-0.841959	-2.1893	-0.564456	-0.842114	-0.744537	-0.233	-0.078	-0.175	-0.198	-0.077	-0.385	0.436	-1.094	10.6072	low
GSM525941	Chibon	-0.719888	-0.52326	-0.218476	-0.362726	-0.763143	0.187186	-0.301322	0.0627583	-0.483302	0.245572	-0.283367	-0.422721	-0.482159	-0.0595579	-1.00238	-0.556356	-0.055379	0.141621	-0.133691	-0.570862	-0.144363	-0.306298	-0.977225	-0.0409775	-0.180274	-0.593092	-0.195564	-0.131493	-0.907191	0.0224777	0.121716	0.0687376	-0.988842	-4.22431	-0.925477	-0.995066	-1.00342	-0.122	-0.061	0.001	-0.155	-0.173	-0.309	-0.473	-0.141	10.3425	low
GSM525942	Chibon	-0.640142	-0.443157	-0.218872	-0.285378	-0.2229	0.328188	0.10657	0.159177	-0.131261	0.492486	0.0963845	0.548159	-0.598441	0.130726	-0.309423	-0.167073	0.223801	-0.342851	-0.266184	0.341744	-0.0150582	-0.291168	-0.553445	-0.078962	0.107805	0.0856982	-0.219735	0.112517	1.18372	0.55176	0.121716	0.316977	-0.240241	3.16041	-0.113528	0.242497	-0.030427	0.024	0.225	0.174	0.125	0.134	0.106	0.752	-0.584	10.8309	low
GSM525943	Chibon	-0.848642	-0.817876	-0.0341843	-0.323895	-0.412651	0.044743	-0.105757	0.222225	-0.236255	0.312841	-0.126146	-0.739698	-1.01996	-0.165095	-0.631403	-0.765593	-0.135935	-0.675414	-0.365946	-0.267977	-0.0292478	-0.454271	-1.43232	0.0156956	0.33382	-0.416755	-0.018039	-1.2494	-0.0448775	0.118828	0.973319	0.0963088	-1.22168	0.359765	-0.865533	-0.878998	-0.312022	0.035	-0.014	0.208	-0.028	-0.063	-0.594	-0.799	0.252	12.5772	high
GSM525944	Chibon	-0.728417	-0.528387	-0.222255	-0.138631	0.0230755	0.432257	0.101857	0.185762	0.192287	0.0657386	0.0330835	-0.177682	-0.664887	0.0856715	-0.0658275	0.0410009	-0.193322	-0.275314	-0.281256	0.0853094	0.260316	0.0844217	-0.522132	-0.10682	0.621888	1.37104	0.0109756	1.18408	0.383261	0.726295	0.244413	0.888607	0.0493755	-1.06113	-0.325199	0.045135	0.267088	0.343	0.462	0.214	0.276	0.295	0.143	0.441	0.758	11.3153	low
GSM525945	Chibon	-0.546036	-0.284068	-0.291076	-0.306546	0.257968	-0.577733	-0.258352	-0.0934759	-0.198178	-0.379107	-0.102995	0.309374	-1.87961	-0.354046	0.404178	-0.266256	-0.287796	0.103774	0.00252098	0.2857	0.0954939	-0.337522	-1.24861	0.0645511	-0.353674	-0.0926773	-0.404827	-0.141897	0.186127	0.703812	0.233604	0.913355	-0.162754	-4.44251	-0.294277	-0.448131	-0.34171	-0.181	-0.094	-0.335	-0.335	-0.321	-0.659	0.049	-0.696	12.1695	high
GSM525946	Chibon	-0.790643	-0.631889	-0.176393	-0.0909471	-0.177254	0.334938	0.484531	0.347239	-0.0882074	0.376873	-0.0477775	-0.160203	-0.507077	0.0172342	-0.421568	-0.220857	0.127296	-0.472079	-0.812974	-0.332718	0.243676	0.314342	-1.51165	-0.248346	0.104305	-0.486796	0.0159705	0.286539	0.608001	0.251003	0.122884	0.259842	-0.350428	-0.244937	-0.223854	-0.257253	0.176764	0.036	0.592	0.133	0.087	0.237	-0.332	0.798	-0.074	11.0445	low
GSM525947	Chibon	-0.810978	-0.546135	-0.29427	-0.345668	-0.236725	0.0474401	0.277488	0.602246	-0.101151	-0.0565873	0.0911243	-0.449183	-0.654505	-0.136105	-0.0630079	-0.285451	0.00779134	-0.436835	-0.59948	-0.321995	-0.0370962	-0.416594	1.17716	-0.247036	0.108539	0.0639079	-0.225654	1.74965	0.82425	0.397488	0.369642	0.765824	-0.252895	1.15869	-0.666277	-0.463049	-0.607144	0.216	0.364	0.146	-0.027	0.042	-0.269	0.579	0.399	12.0203	high
GSM525948	Chibon	-0.296492	-0.637409	0.378797	-0.183454	-0.288198	0.265606	0.249157	0.178882	-0.0532103	-0.130561	-0.138617	0.447917	-0.415713	0.00403489	-0.954012	-0.0537456	0.0629271	-0.339111	-0.607882	-0.0741247	0.509696	0.0620983	-1.5534	-0.0957258	0.574897	-0.215778	0.289006	0.0803603	1.14402	0.344554	0.121716	0.157235	-0.38669	2.80884	-0.437891	-0.219226	-0.190963	-0.06	0.094	0.155	0.291	0.171	0.289	0.12	-0.469	9.88475	low
GSM525949	Chibon	-0.465274	-0.705852	0.267309	-0.0405356	-0.675211	0.240003	-0.308214	0.0217552	-0.0652719	-0.102522	-0.315775	0.532513	-0.783245	-0.00280631	-0.849177	-0.223915	0.1288	-0.110647	-0.392327	0.385387	0.556896	-0.21867	-0.0983521	-0.0241774	0.464056	-0.0600813	0.0606811	-0.246878	0.953458	0.200389	0.121716	0.182464	-0.741472	2.18572	-0.614061	-0.464094	-0.235698	-0.103	-0.016	0.055	0.135	0.107	0.158	0.181	-0.158	9.86125	low
GSM525950	Chibon	-0.151303	-0.0583816	-0.103246	0.0160676	-0.647796	-1.37589	-1.56652	-0.411282	-0.261892	-0.805591	-0.362558	0.97643	2.22554	-0.901693	-0.129071	-0.463922	0.153803	0.938251	2.09773	0.749427	-0.340931	1.28703	1.6239	-0.569882	-1.0925	-0.186582	-0.0627948	-2.45242	-0.530716	0.698373	0.8691	0.896411	-0.889287	-0.980797	-0.209182	-0.474926	-0.773478	-1.606	-1.916	-1.137	-1.254	-1.284	0.012	-1.226	-1.175	10.9505	low
GSM525951	Chibon	-0.296087	-0.42226	0.140192	-0.188394	-0.138914	0.0132138	0.444227	0.0299323	-0.0187746	-0.49717	-0.114903	0.11755	-0.951438	-0.106467	0.221389	-0.347319	-0.229682	-0.59354	-0.159419	-0.918445	-0.0814783	-0.320791	-1.59515	0.232686	0.222483	0.0889348	0.161923	-1.98427	-0.597379	0.936704	0.711819	0.550137	-0.0679442	-3.61589	-0.552064	-0.441413	-0.00782246	0.095	0.189	-0.007	-0.065	0.104	0.088	0.158	-0.083	9.96139	low
GSM525952	Chibon	0.657373	0.586758	0.078461	1.28638	1.95383	0.470554	0.554561	0.343005	0.581356	0.0892035	0.537348	0.318052	-0.972203	0.726026	0.567592	1.13129	-0.218495	0.327157	-0.0592839	0.53586	0.463635	1.82605	-0.033637	0.389022	0.272139	-0.339559	0.608956	1.08572	0.89474	0.6841	0.284219	0.431619	2.01897	9.42293	1.66426	1.89439	1.57744	-0.103	0.226	-0.01	0.355	0.096	0.195	0.7	-0.068	10.4764	low
GSM525953	Chibon	-0.555101	-0.404058	-0.167825	-0.125613	-0.0169054	-0.0213668	-0.179909	-0.0956453	0.00890922	-0.267891	0.221766	-0.81614	-0.731334	-0.237969	0.214866	-0.112674	0.0868469	-0.174956	-0.165284	-0.751408	0.276868	-0.712106	-1.41144	-0.102892	-0.0245212	1.29934	-0.380776	0.00469836	0.327762	0.330046	0.204206	0.766076	-0.0774549	-4.41676	-0.506903	-0.563816	-0.66426	-0.038	0.187	0.101	-0.083	-0.071	-0.171	-0.26	0.729	11.6269	low
GSM525954	Chibon	-0.558646	-0.103597	-0.50561	-0.309622	0.158132	0.103222	0.275067	-0.0918035	-0.0184502	-0.191547	0.0858628	-0.216868	-0.766634	0.0845212	0.517327	0.237075	-0.0480686	0.00695158	-0.529009	-0.35314	-0.0887407	-0.432588	-0.797693	-0.11007	-0.0261167	0.481696	-0.443378	0.149402	-0.138956	0.472473	0.184114	0.514779	0.645023	-0.291128	-0.0306439	0.0850704	-0.534363	0.082	0.231	0.12	0.112	0.015	0.016	-0.265	0.519	10.414	low
GSM525955	Chibon	-0.565806	-0.657591	0.101983	-0.317007	-0.459749	-0.0658193	-0.517329	-0.11183	0.040367	0.0396978	-0.358341	0.32051	-0.623358	-0.179468	0.0106192	-0.868093	-0.226701	0.2725	-0.36749	0.250547	0.349554	-0.145803	-0.148454	-0.0465505	0.332637	-0.246229	0.617119	-1.11983	1.14284	0.0992687	0.932547	0.157932	-0.997534	-2.38191	-0.413059	-0.611201	-0.39876	-0.218	-0.136	-0.179	0.031	-0.234	-0.409	0.181	-0.01	10.365	low
GSM525956	Chibon	-0.369767	-0.470176	0.111566	0.16126	0.01731	-0.563383	-0.581671	0.62234	0.279455	-0.253693	-0.431068	0.000402569	-2.09349	-0.478498	0.498994	0.123663	-0.143765	0.857123	-0.537454	0.668087	0.310401	-0.259827	-0.119228	-0.126557	0.0576874	0.280308	0.349275	1.09896	0.93254	0.294906	0.892991	0.959102	0.381409	-2.50694	0.164608	0.306529	0.513816	-0.478	-0.578	-0.262	-0.366	-0.525	-0.134	-0.392	0.118	11.7904	high
GSM525957	Chibon	-0.657384	-0.552026	-0.117064	-0.236598	-0.0865796	-0.0976241	0.333605	0.511478	-0.00447694	0.453197	0.117988	0.240236	-0.457242	-0.0253643	0.175097	0.0860873	0.0242804	-0.00654061	-0.406681	0.316321	0.0536066	-0.0105238	0.0206401	0.0235864	0.158066	-0.131172	0.107296	1.97475	0.293363	0.537523	0.121716	0.788505	0.165169	5.21358	-0.130713	0.261107	0.0832803	0.097	0.241	0.095	0.04	-0.033	0.366	0.626	-0.168	10.9117	low
GSM525958	Chibon	-0.572372	-0.734788	0.180463	-0.303462	-0.674241	0.112135	-0.0420981	0.143386	0.149509	0.282515	-0.335967	0.892106	-0.482159	-0.111009	-0.456912	-0.461956	-0.0788569	0.2301	0.359484	0.0695379	-0.0399008	-0.0384769	-0.597285	0.0954473	0.39084	-0.404493	0.390654	-0.00192206	0.0871014	0.353431	0.275122	0.73247	-1.09354	0.640767	-0.62584	-0.375835	-0.585365	-0.088	0.026	0.062	0.157	0.161	0.219	0.341	-0.156	9.84082	low
GSM525959	Chibon	-0.936811	-0.531178	-0.450703	0.1856	-0.514772	0.190276	0.119629	0.00947357	-0.0101758	0.238683	-0.476678	-0.928825	-0.455166	-0.0438436	0.0388314	-0.425287	0.119808	-0.732111	-0.659447	-0.311514	-0.223714	-0.473464	-1.42397	-0.27362	-0.253095	-0.126657	-0.418158	-1.50003	-1.02099	0.943896	0.99441	0.920312	-0.492755	2.54612	-0.447976	-0.341993	-0.471587	0.492	-0.269	-0.042	0.023	-0.108	0.212	-0.165	-0.072	13.2986	high
GSM525960	Chibon	-0.489147	-0.471762	-0.0193166	-0.0517477	-0.0454466	-0.149693	0.146005	-0.203908	0.421062	0.226532	0.125885	-0.228745	-1.28367	0.237828	0.392022	0.175211	-0.328134	-0.449464	-0.579872	-0.0390691	0.231787	0.471499	-1.60559	0.270805	0.12075	-0.0151428	0.269383	0.540007	1.27478	0.833555	0.662902	0.669968	0.170768	-0.869721	-0.258322	-0.036949	0.130716	0.052	0.385	0.073	0.254	0.115	-0.101	0.832	0.25	10.4243	low
GSM525961	Chibon	-1.07924	-0.51728	-0.6244	-0.273434	-0.668131	-0.348834	0.220485	0.190647	0.543243	-0.490591	0.64332	-0.282174	0.101324	-0.0646302	0.884349	-0.38362	-0.0564491	-0.160454	0.165369	-0.0415608	-0.223582	-0.779489	-0.885371	-0.0271963	-0.56989	-0.0183685	-0.719582	-1.25507	-0.945609	0.0489105	0.38352	0.578602	-0.99777	-8.00863	-0.820581	-1.29488	-0.834275	-0.125	-0.115	-0.047	-0.345	-0.102	0.146	-0.748	0.054	9.83162	low
GSM525962	Chibon	-0.424651	-0.511457	0.0964506	-0.188522	-0.267529	-0.0504524	-0.380377	-0.184799	0.0280135	0.00557343	-0.417453	0.882377	-0.637894	0.146108	-0.122611	0.200127	-0.027945	0.280218	-0.402504	0.181295	-0.0418937	-0.435858	0.0603042	0.149846	0.208671	-0.491788	0.27639	-0.401039	0.403721	0.710421	0.780976	0.772685	0.330141	3.01313	0.451856	0.394274	0.770098	-0.135	-0.159	0.032	0.184	0.149	-0.186	-0.277	0.027	10.7237	low
GSM525963	Chibon	-0.84161	-0.439585	-0.446695	-0.370124	-0.164859	0.191211	0.270713	-0.411174	-0.239626	0.0753685	-0.0187718	-0.128123	-0.550682	0.383064	-0.0859062	-0.317325	0.259358	-0.495512	-0.534228	-0.188486	-0.0184224	-0.348862	-1.22356	-0.0175459	-0.300664	0.496011	-0.335655	0.475694	0.721254	0.26725	0.582834	0.443402	-0.413815	-4.9186	-0.425626	-0.357503	-0.487443	-0.033	0.278	-0.134	-0.033	0.036	-0.517	0.407	-0.456	11.0016	low
GSM525964	Chibon	0.0660792	-0.0972301	0.181455	-0.227371	0.578768	-0.106027	0.463325	0.489168	0.169118	-0.10252	0.178898	-0.0706007	-0.600517	0.370984	0.571347	0.564172	-0.081841	0.183656	-0.299453	0.668586	0.141125	0.484461	-0.106702	0.382761	0.644797	0.715717	0.488415	1.20867	0.150024	0.885298	0.739784	0.904923	1.3999	3.07813	0.724754	1.07758	0.521243	0.11	0.305	0.171	0.099	0.17	0.551	0.728	0.184	11.2877	low
GSM525965	Chibon	-0.778541	-0.626535	-0.168896	-0.148357	-0.146491	0.263284	-0.205532	0.288436	-0.0476861	0.26614	-0.215444	-0.0795303	-0.237138	-0.253932	-0.117303	-0.104522	-0.026226	0.101061	0.0748039	-0.274757	-0.0503859	-0.251111	-0.611898	-0.110207	-0.0348841	-0.364191	0.0537949	0.814282	-0.329045	0.130897	0.401057	0.418064	-0.383974	4.10413	-0.166482	-0.0596503	-0.128714	-0.039	-0.185	-0.013	-0.157	0.013	-0.122	-0.79	0.473	12.615	high
GSM525966	Chibon	-0.352848	-0.0753621	-0.308318	0.613581	0.459803	-0.4508	-0.297355	0.582086	0.21694	-0.339474	-0.180083	-0.176566	-0.509153	-0.281275	1.12415	0.15168	0.183276	0.23338	-0.0566829	-0.366284	-0.118381	-0.0322336	-0.446979	-0.189662	-0.453653	0.11892	0.00797053	1.03465	-0.145711	0.978593	0.329785	0.852473	0.722881	-1.02145	0.391969	0.25607	0.788415	-0.159	-0.5	-0.474	-0.41	-0.452	0.035	0.153	0.414	11.1385	low
GSM525967	Chibon	-0.00398068	0.19368	-0.219624	0.123765	0.93373	-0.260894	-0.581067	0.104912	0.115475	-0.324101	-0.206803	-0.0815905	-0.160309	-0.270267	1.06818	0.516795	-0.396852	0.696433	0.143551	0.0425908	0.0559062	0.396046	0.638565	-0.158131	-0.205325	0.023338	0.243609	0.718758	0.216619	0.280871	0.217702	0.672794	1.59042	5.49005	1.09535	1.2861	0.604219	-0.611	-0.676	-0.426	-0.457	-0.478	0.126	-0.384	0.1	11.2111	low
GSM525968	Chibon	-0.615327	-0.405858	-0.232744	0.00914841	-0.00812937	-0.396269	-0.178742	0.181216	0.059312	-0.592233	0.194377	0.205583	0.0930185	-0.142435	0.0601067	-0.297523	0.159113	0.0600043	0.160517	-0.177822	0.283523	-0.782758	-0.568058	0.107926	0.306134	0.0943193	-0.22072	0.256274	0.310154	0.825222	0.303305	0.976143	-0.418721	-4.32466	-0.518422	-0.421441	-0.247731	0.116	0.206	0.107	-0.062	-0.059	-0.163	0.221	1.449	12.4444	high
GSM525969	Chibon	-0.437385	-0.571802	0.149352	-0.188499	-0.266022	0.101517	-0.282828	0.0260453	0.10456	-0.00984434	0.00594124	0.66697	-0.106321	-0.0624173	-0.598919	-0.167157	0.118708	-0.0244409	0.624198	0.204203	0.550254	0.0786999	-0.61816	0.0549686	0.266671	0.390391	0.159328	-0.865414	-0.142383	0.184586	0.135844	0.0860565	-0.369723	3.49163	-0.309575	-0.460046	-0.11507	0.009	-0.147	0.161	0.071	0.274	0.347	-0.107	0.044	11.3531	low
GSM525970	Chibon	-0.903726	-0.537441	-0.406983	-0.0547301	-0.627043	0.338365	-0.647768	-0.382739	-0.0477699	0.113322	-0.1613	0.155485	0.404487	0.166662	-0.0428406	-0.670523	0.0518458	0.363192	0.43997	-0.339184	-0.29377	-0.601117	-0.816481	-0.291298	-0.344448	0.123265	-0.268345	-1.59744	0.0781965	0.0854208	0.880268	0.632767	-1.02896	-2.59758	-0.717177	-0.816228	-0.739238	0.066	-0.155	0.299	0.166	0.258	-0.581	-0.442	0.254	10.7993	low
GSM525971	Chibon	-0.462252	-0.434706	-0.0306072	-0.239049	-0.19136	0.0579138	0.0658461	0.183479	0.159279	-0.122601	-0.0866635	0.676687	-0.51123	0.0592746	0.382635	-0.0657686	0.0943334	-0.145513	-0.385489	0.855645	0.270905	-0.212668	-0.578496	0.103153	0.162148	-0.228742	0.139381	0.425568	1.03846	0.55815	0.140606	0.801377	-0.246496	0.54293	-0.369405	-0.226234	0.389073	-0.063	0.158	0.013	0.164	0.147	0.235	1.004	-0.688	10.4846	low
GSM525972	Chibon	-0.946307	-0.666601	-0.310785	-0.253183	-0.344019	0.0757418	0.276618	-0.3142	-0.0968219	0.282398	0.181056	-0.634003	-1.53492	0.102237	-0.304527	-0.650643	-0.0195332	-0.184816	-0.298818	0.289872	0.0604549	-0.268725	-0.171418	0.0368992	-0.237479	0.115822	0.23027	1.639	-0.607289	0.216294	0.74567	0.169177	-0.892564	3.69548	-0.669215	-0.723555	-0.241932	0.239	0.214	0.119	0.044	0.218	-0.432	0.298	-0.136	14.208	high
GSM525973	Chibon	-0.885985	-0.420321	-0.517405	-0.126321	-0.123561	0.029007	0.667305	0.0660853	-0.203252	0.147879	-0.358383	-0.715924	-0.51123	0.0708286	0.328056	0.368085	0.14055	-0.0749351	-0.0277499	-0.0281746	0.105379	0.146424	-0.225695	0.0727252	-0.248202	0.469763	-0.549546	-0.57979	-1.28288	0.884664	0.516709	0.887088	0.115219	1.57005	-0.285523	-0.0927112	-0.0393553	0.638	-0.171	-0.039	0.024	0.172	0.073	-0.558	0.097	13.4314	high
GSM525974	Chibon	-0.4754	-0.256461	-0.243265	-0.0348039	-0.169724	0.0382778	-0.358741	-0.2916	0.127208	0.200506	-0.156214	1.17289	-0.399101	-0.279133	0.352638	-0.36057	-0.164456	0.17261	-0.239098	-0.0606946	0.150598	0.744809	-0.906247	0.195137	-0.1504	-0.278118	-0.0792419	-0.123927	1.79583	0.490215	0.136932	0.272538	0.30161	0.464774	0.0618327	0.331378	-0.0349859	-0.391	-0.117	-0.246	-0.295	-0.282	-0.069	0.723	-0.252	10.2761	low
GSM525975	Chibon	-1.05319	-0.535488	-0.575227	-0.365861	-0.768296	-0.0814199	-0.172961	-0.29822	0.0387225	0.11548	-0.00504978	-0.950607	-0.419866	-0.37586	-0.0322356	-0.933787	-0.0462158	0.278295	-0.0974715	-0.400834	-0.221318	-0.766518	-0.407314	-0.198304	-0.485326	-0.217232	-0.645729	-0.216613	1.01902	0.310546	0.121716	0.67709	-1.21361	-7.96824	-0.815255	-1.19525	-0.807889	-0.134	0.307	-0.121	-0.286	-0.224	-0.395	0.26	0.117	11.9049	high
GSM525976	Chibon	-0.279817	-0.34951	0.0774368	-0.22719	0.0647298	0.111385	0.464633	0.437808	-0.24845	-0.308289	-0.227351	-0.17083	-0.953515	0.217045	-9.09178e-06	0.156517	-0.0887917	-0.107411	-0.0875556	0.10255	0.138794	-0.048798	-0.902072	-0.167676	0.434819	0.53286	0.106692	0.00848146	-0.00601834	0.908168	0.346576	0.938281	-0.245337	2.81007	-0.162259	0.113357	-0.0423521	0.133	0.122	0.24	0.308	0.289	1.011	-0.384	0.48	12.3463	high
GSM525977	Chibon	-0.405895	0.188474	-0.66041	0.977098	0.365638	-0.514868	-0.0352172	0.665856	0.167488	-0.461824	-0.147982	0.255263	0.0535658	-0.341285	0.182045	0.167957	0.140088	0.339097	0.238995	-0.653651	-0.0780473	-0.332391	-0.503343	-0.0290791	-0.578487	-0.276937	-0.394867	-0.561821	-0.78016	0.82481	0.755238	0.837658	0.152404	-1.18133	0.0889089	0.0641318	0.346866	-0.345	-0.438	-0.435	-0.359	-0.534	-0.255	-0.451	0.229	10.8504	low
GSM525978	Chibon	-1.11323	-0.580683	-0.591717	-0.298332	-0.606141	0.896416	0.57323	0.252887	-0.372185	0.157134	-0.533481	-0.52437	-0.901603	0.0950962	-0.219315	-0.316024	0.0329396	-0.592912	-0.564486	-0.828947	-0.216509	-0.23304	-1.17137	-0.161763	-0.401206	-0.747476	-0.607143	0.157914	-0.793999	0.224518	0.173565	0.158579	-0.425126	-1.46591	-0.415294	-0.322885	-0.683825	0.081	0.256	0.172	-0.12	0.143	-0.384	0.126	-0.215	10.2741	low
GSM525979	Chibon	-0.778758	-0.45981	-0.354387	-0.076902	-0.573684	-0.28435	-0.0208529	-0.174989	-0.55581	-0.0323591	-0.415774	1.20714	-0.644123	-0.242548	0.794794	-0.622295	-0.381005	0.218003	0.0728495	-0.463579	-0.464276	-0.287958	-1.01063	-0.0550648	-0.76549	-0.324126	-0.36204	-1.32317	0.742424	0.907467	0.325684	0.92487	-0.986377	-7.84092	-0.592646	-1.04562	-0.948357	-0.508	-0.557	-0.529	-0.594	-0.554	-0.557	0.469	-1.066	11.5585	low
GSM525980	Chibon	-0.214214	-0.564794	0.389533	0.0912683	0.353117	-0.480845	-0.295761	-0.277981	0.162608	-0.339424	0.0041099	0.255042	-0.828927	-0.250924	0.298794	-0.0394819	-0.398598	0.204655	0.249177	0.866371	0.412024	0.338251	-0.745503	0.18301	0.40977	0.389187	0.28417	0.866299	0.277703	0.911119	0.990121	0.814814	0.114958	-1.47746	-0.376803	-0.218528	-0.0632929	-0.089	0.146	-0.164	0.113	-0.172	-0.028	0.46	-0.105	12.4709	high
GSM525981	Chibon	-0.765598	-0.57923	-0.207076	-0.0727103	-0.171021	0.106816	0.202484	-0.306298	0.1875	0.562072	0.0704505	-0.059614	-0.492542	-0.0915406	0.0329237	0.0313959	-0.0117546	0.32994	0.317989	-0.0777081	0.0567454	-0.412447	-0.319636	0.0123597	0.013026	-0.442982	0.0865226	0.474748	0.178234	0.115378	0.216097	0.120868	0.544026	5.23904	0.161996	-0.0746903	-0.00575759	0.033	-0.155	0.056	0.19	0.157	-0.465	-0.758	-0.042	14.0803	high
GSM525982	Chibon	-0.318156	-0.326051	0.00877235	-0.225889	-0.353638	0.0424486	0.139223	-0.361448	-0.199478	-0.0374437	0.265231	0.700973	-0.00872781	0.0918805	-0.326582	-0.384501	-0.00420575	-0.000893427	0.187129	-0.113003	-0.0464858	-0.185313	-1.08787	-0.0779664	-0.159074	-0.30098	-0.195186	-2.3238	0.150226	0.545673	0.963267	0.797887	-0.275682	0.521897	-0.157913	-0.268767	-0.243318	-0.154	-0.202	-0.029	-0.018	-0.001	-0.026	-0.594	-0.683	10.8953	low
GSM525983	Chibon	-1.09533	-0.694635	-0.44522	0.148327	-0.605612	0.39078	-0.029345	0.0339215	-0.0826713	0.355626	-0.362147	-0.503759	-0.901603	-0.11306	0.0912345	-0.636902	0.144709	-0.480226	-0.465226	-0.490746	-0.0258053	-0.403016	-0.526307	-0.279146	-0.505986	-0.308533	-0.382672	-0.179728	-1.1311	0.764592	0.163703	0.334656	-0.669283	-0.297565	-0.484271	-0.605974	-0.65091	0.507	-0.245	-0.056	-0.124	0.019	-0.129	-0.411	0.037	13.5796	high
GSM525984	Chibon	0.131651	0.499505	-0.408727	1.71645	2.26903	0.360739	0.468728	0.0114336	0.68102	0.309164	0.45898	0.417693	0.04526	0.229034	1.41812	1.30459	-0.0654815	0.352118	0.292346	0.646081	0.311721	1.13487	0.325427	-0.0745882	0.0355924	0.1852	-0.243046	0.430297	-0.13801	0.849218	0.133674	0.503961	2.31948	7.34827	2.31028	1.96836	2.14341	0.175	0.008	-0.072	0.086	0.267	0.689	0.339	0.63	11.7792	high
GSM525985	Chibon	-0.311449	-0.0178349	-0.326238	-0.326054	0.855555	-0.0718214	-0.212551	-0.0250411	0.0597995	0.0684981	0.184343	0.178882	-0.729258	0.100909	0.978928	0.564307	0.0901467	0.304123	-0.313168	-0.56447	0.155046	0.150158	-0.421928	-0.190012	0.00568516	-0.0807482	-0.306303	-0.713145	0.00114808	0.493072	0.121716	0.574265	1.17335	-0.193483	0.869372	0.700294	0.699795	0.008	0.045	0	-0.07	0.031	-0.088	-0.689	0.586	10.7809	low
GSM525986	Chibon	-0.679498	-0.564113	-0.128205	-0.276619	-0.500416	-0.112859	-0.436387	-0.241462	-0.0836763	0.301124	-0.288179	-0.0168196	-0.363802	0.03906	-0.464134	-0.742546	0.134645	0.0539152	-0.101063	-0.0548901	-0.121336	-0.883624	-0.712102	0.0307101	0.15158	-0.452205	0.0947018	-0.761379	0.685827	0.216335	0.982043	0.295704	-0.798923	-2.10028	-0.559381	-0.633107	-0.218913	-0.168	-0.254	0.115	0.103	0.064	-0.385	-0.825	0.09	13.3854	high
GSM525987	Chibon	-0.245052	-0.286992	0.0466009	-0.232854	0.117191	0.216012	-0.125534	0.382178	-0.133228	0.204273	-0.247462	-0.00279189	-0.21845	-0.291941	-0.610476	-0.414687	-0.0394133	-0.366471	-0.328926	1.41019	0.584636	-0.0454852	-0.29041	-0.163269	0.774491	0.221542	-0.0924017	-1.12929	-0.126824	0.149283	0.272761	0.0946537	-0.183915	1.15189	0.155427	0.399376	0.269598	-0.148	0.032	-0.018	-0.05	0.141	0.023	-0.21	0.146	10.1279	low
GSM525988	Chibon	0.515307	0.491699	0.0262303	0.124366	1.57301	0.554929	0.384015	0.104317	0.640909	0.401819	0.121819	0.475716	0.103401	0.266052	0.39719	1.05013	-0.387831	0.163688	0.302705	1.15921	0.0606339	2.61308	-0.595197	-0.227989	0.290318	-0.547122	0.0474093	-1.31371	-0.243011	0.179324	0.194999	0.0703704	2.03135	11.0843	2.04089	2.17165	1.7824	-0.149	-0.405	-0.065	-0.021	0.292	0.426	-0.618	-0.971	10.8687	low
GSM525989	Chibon	0.177411	0.161845	0.0172951	-0.167996	1.27625	-0.0255288	0.236514	-0.0641469	1.27339	-0.201565	0.454875	-0.573439	-1.33974	0.737823	1.81499	1.52204	-0.0379268	0.206176	-0.148911	0.310789	0.0882489	0.429682	-0.714189	0.522567	0.606679	0.342797	0.362525	1.50281	0.104763	0.966285	0.924032	0.318205	1.59394	6.10083	1.5201	1.54117	1.41716	0.028	0.161	0.077	0.601	0.115	0.307	0.56	-0.127	11.9805	high
GSM525990	Chibon	-0.440061	-0.331854	-0.120229	-0.156818	-0.270313	-0.111887	-0.164719	-0.16011	0.071893	-0.437025	0.101602	-0.389764	1.78948	0.0661769	-0.434975	0.34139	0.303236	0.462835	0.171199	0.108102	-0.302169	-0.258941	0.78052	-0.0057938	0.172014	-0.142202	0.146812	0.0926554	1.13498	0.694655	0.237381	0.505396	-0.391345	-3.00166	-0.0440783	0.0204561	-0.395536	-0.078	0.307	0.075	-0.057	0.072	0.163	1.127	-0.019	10.6388	low
GSM525991	Chibon	0.201067	0.247759	-0.0518799	1.1543	1.18626	-0.115224	0.0779956	0.0324278	0.11426	-0.41451	0.422215	0.281167	0.504156	0.118988	0.302713	0.706977	0.132438	0.507403	0.639424	0.0807222	-0.0729305	0.148782	2.50904	-0.320007	0.101064	0.501729	-0.0777017	1.97758	0.0495467	0.640073	0.273997	0.873294	1.49304	-0.237943	0.852404	0.553012	0.637285	0.005	0.11	0.038	-0.062	-0.069	0.062	-0.203	0.705	12.1031	high
GSM525992	Chibon	0.0987317	0.105444	-0.0074582	-0.0142537	0.613623	-0.311482	-0.118828	-0.476478	0.189834	-0.00799564	0.0239442	0.183363	2.4228	0.148471	0.775086	0.492889	0.170777	0.0763664	0.829247	0.1354	-0.118862	0.735837	0.955877	-0.196226	0.108201	-0.221469	0.133067	-0.541959	-1.41902	0.532921	0.539624	0.190699	1.59153	5.61385	1.08159	1.03682	0.828653	-0.227	-0.274	-0.097	-0.024	-0.07	0.228	-0.338	-1.234	13.9515	high
GSM525993	Chibon	-1.04042	-0.428477	-0.679938	-0.188847	-0.698153	0.0849983	0.0918697	-0.0253372	-0.36592	0.393549	-0.160041	-0.31341	1.41157	-0.140732	-0.55047	-0.617031	0.575264	-0.010199	0.190251	-0.77394	-0.798572	-0.314722	1.56754	-0.144628	-0.784364	-0.386759	-0.450381	0.386791	-0.244198	0.130496	0.157904	0.0192173	-1.19308	-2.22758	-0.792299	-1.1077	-0.87748	-0.156	-0.028	-0.12	-0.233	-0.318	-0.249	0.468	-0.525	11.07	low
GSM525994	Chibon	-0.598309	-0.218047	-0.422514	-0.1282	-0.158155	-0.26922	-0.578393	-0.252689	-0.167459	-0.223286	-0.0744218	-0.851148	1.64205	0.00849658	-0.991343	-0.158097	0.460767	0.035996	0.386113	0.657807	-0.160653	-0.29785	1.64687	-0.15663	-0.245851	1.1796	-0.0750614	0.775505	0.717028	0.540433	0.869519	0.374449	-0.0854503	-2.9431	-0.135749	-0.140539	-0.705	-0.192	0.142	-0.078	0.198	-0.156	0.189	0.391	0.162	11.4021	low
GSM525995	Chibon	-0.403461	-0.084054	-0.354896	0.0675204	0.629023	-0.11629	0.486156	-0.348443	-0.211294	-0.011545	0.227091	-0.459448	1.22884	0.251589	0.542608	0.431741	0.164367	-0.138739	0.066141	0.524101	-0.194894	0.802775	1.79509	0.115125	-0.247217	0.0295041	-0.237975	1.25123	-0.198743	0.695776	0.270523	0.408036	0.982105	3.08611	0.808016	0.845083	0.399879	-0.1	0.272	-0.082	-0.141	-0.199	0.095	0.729	-0.393	11.0833	low
GSM525996	Chibon	-0.263097	-0.26999	0.00765945	-0.0120405	-0.0796801	0.0368226	-0.190979	-0.477214	-0.112948	-0.0180424	-0.202315	-0.306622	1.71265	-0.121678	-0.511852	-0.131177	0.234416	-0.193238	0.342719	0.576984	-0.300538	1.02757	-0.424015	-0.0299214	-0.0344275	-0.17312	0.0125501	-1.51989	0.0906708	0.61038	0.200762	0.122923	-0.0745103	-1.35111	0.155069	0.281911	0.0913788	-0.268	0.026	-0.166	-0.166	-0.232	0.241	0.976	-1.013	10.742	low
GSM525997	Chibon	-0.401514	-0.394423	-0.00787925	-0.190019	0.308258	-0.0179271	0.200901	-0.0326904	0.0542896	0.150759	0.306319	-0.269215	-0.563141	0.25636	0.376054	0.629922	0.101958	-0.335577	-0.083855	0.744063	0.402488	0.609574	-0.0566004	-0.0470572	0.241849	0.602505	0.237562	0.980738	1.17245	0.700244	0.121716	0.448604	0.694016	4.27247	0.319881	0.448594	0.481594	0.295	0.548	0.256	0.124	0.199	0.074	1.305	-0.095	10.9617	low
GSM525998	Chibon	-0.965755	-0.604362	-0.401548	-0.0507826	-0.921241	0.0320492	-0.158745	-0.309193	-0.107575	0.0948772	-0.405145	-0.510146	0.439786	-0.406628	-0.539174	-0.484885	0.179349	-0.433031	0.497203	-0.568724	-0.453426	-0.589562	-0.795605	-0.303585	-0.446963	-0.471188	-0.562259	-0.386852	-1.16199	0.769269	0.337917	0.498116	-1.14984	1.8057	-0.829774	-0.743523	-0.999006	0.572	-0.418	-0.073	-0.14	0.086	0.327	-0.504	0.144	11.3705	low
GSM525999	Chibon	-0.88476	-0.356276	-0.587205	0.0128817	-0.927597	-0.920876	-0.297989	-0.1777	-0.417337	-0.754967	0.0534748	-0.369085	3.17448	-0.0991642	-0.42845	-0.19457	0.696217	0.352712	1.26688	-0.684828	-0.647458	-0.393628	1.45063	-0.086913	-0.810315	-0.279338	-0.785498	-0.297004	-1.30844	0.356427	0.503226	0.815093	-1.14708	-8.57126	-0.475053	-1.17284	-1.22645	-0.33	-0.435	-0.316	-0.371	-0.406	-0.093	-0.147	0.123	12.5047	high
GSM526000	Chibon	-1.16764	-0.582313	-0.650369	-0.0974597	-0.713179	0.126594	-0.188641	-0.115024	-0.251871	0.0947072	-0.315473	-0.482917	1.30359	-0.144069	-0.615522	-0.542996	0.351129	-0.229147	0.315929	-0.81735	-0.545502	-0.340595	-0.363475	-0.0817221	-0.862681	-0.386398	-0.288347	-0.721657	-1.55459	0.767456	0.640699	0.425262	-0.799479	3.3159	-0.493829	-0.749715	-0.641994	0.46	-0.365	-0.148	-0.125	-0.056	0.047	-0.481	0.017	12.7448	high
GSM526001	Chibon	-0.589505	-0.389542	-0.222181	-0.252569	-0.695046	-0.145172	-0.121994	0.0283635	-0.224542	-0.388243	0.163682	0.341407	1.68151	-0.161641	-0.64703	-0.501813	0.121909	-0.245726	0.162899	-0.686816	-0.278287	-0.734378	0.655265	-0.346439	-0.0399781	-0.350041	-0.298388	-0.696121	0.176285	0.41661	0.336351	0.474814	-1.36782	-6.80485	-0.565194	-0.804972	-0.901565	-0.134	0.2	-0.103	-0.019	-0.057	0.378	0.717	-0.38	10.5571	low
GSM526002	Chibon	-0.921157	-0.667014	-0.282382	-0.154242	-0.753564	-0.263286	-0.263154	-0.068233	-0.35749	-0.015453	-0.117409	-0.179922	1.33266	-0.401617	-0.970027	-0.791274	0.136325	-0.125606	0.370451	-0.239739	-0.204673	-0.52937	0.154245	-0.0994136	-0.297061	-0.0217607	-0.0679517	0.685656	0.0291995	0.155947	0.508672	0.324482	-1.33723	-8.22933	-0.591774	-0.597947	-0.507413	-0.004	0.145	0.141	0.071	-0.028	-0.239	-0.115	0.523	11.0741	low
GSM526003	Chibon	0.0374691	-0.329174	0.407381	-0.0483523	-0.0590335	-0.4268	-0.312353	-0.149721	-0.0290319	-0.212252	-0.0743809	0.246367	1.93899	-0.0482589	-0.546856	0.137837	0.393319	-0.0208757	-0.0118326	1.07945	0.375606	-0.0412808	1.06234	0.276007	0.339451	1.0033	0.502122	0.376388	0.454192	0.582247	0.246176	0.132265	0.161978	2.31687	0.132554	0.105452	0.21877	-0.121	0.094	0.002	0.128	0.172	0.928	0.389	-0.218	12.5261	high
GSM526004	Chibon	-0.568164	-0.420234	-0.164367	-0.222568	-0.23085	-0.156142	-0.118317	-0.253978	-0.0765892	-0.247704	0.0643312	0.745393	0.23837	-0.130922	0.252628	-0.240472	0.286116	-0.0130196	-0.167924	-0.0144641	-0.0273822	0.0243449	0.285763	-0.332715	0.158387	0.372852	-0.152145	-0.0690721	1.24668	0.626824	0.142749	0.32398	-0.299778	-1.58851	-0.120858	-0.282541	-0.192043	0.011	0.27	-0.02	0.006	-0.172	-0.092	0.414	-0.09	11.0792	low
GSM526005	Chibon	-0.223187	-0.328686	0.117221	-0.16062	-0.134037	-0.38569	-0.465945	-0.0829782	0.529284	0.174123	-0.118766	0.055225	1.91615	0.0718161	-0.139246	-0.327799	0.360695	0.291858	1.0589	0.792207	0.00995851	-0.031719	1.37757	0.0667997	0.220292	0.192661	0.692181	-0.977016	0.311643	0.439536	0.5452	0.651627	0.466738	1.91669	0.480678	0.199233	0.276152	-0.165	-0.245	0.085	0.112	-0.003	0.224	-0.376	-0.118	13.7615	high
GSM526006	Chibon	-1.02552	-0.484998	-0.600579	0.290709	-0.9054	-0.0913208	-0.442436	-0.530608	-0.241604	-0.246394	-0.277035	-0.995521	1.78325	-0.0968596	-0.131471	-0.755407	0.134793	-0.173838	0.375458	-1.04199	-0.869032	-0.243512	0.997629	-0.545552	-1.0322	-0.197326	-0.606454	-1.5965	-1.6614	0.271335	0.891276	0.211961	-1.34783	0.388882	-0.558842	-1.11531	-1.41316	0.248	-0.596	-0.397	-0.173	-0.126	-0.043	-0.668	-0.655	12.5251	high
GSM526007	Chibon	-0.303059	0.0420462	-0.38345	-0.0269445	0.892208	0.20306	0.0430442	-0.429358	0.315422	-0.0505626	-0.307804	-1.08361	0.657814	0.144492	0.496987	0.570654	0.083043	0.0382276	0.291555	-0.535235	-0.381721	0.271105	0.671966	-0.129598	-0.156733	-0.116964	-0.224961	-0.715036	-0.924115	0.907174	0.677429	0.366467	1.42943	0.414798	1.20614	0.962813	0.619781	0.31	-0.09	-0.129	0.038	-0.04	0.288	-0.132	0.182	12.4536	high
GSM526008	Chibon	-0.615373	-0.373774	-0.268444	0.372469	-0.00298608	-0.706959	-0.395995	0.0352408	0.00441562	-0.448404	0.198475	-0.213846	1.86216	-0.120318	-0.284945	-0.478435	0.339505	0.107719	0.689887	0.635458	0.0651511	-0.213021	1.55084	-0.00500502	-0.0090872	0.404514	-0.329695	1.30041	-0.618787	0.822033	0.69318	0.73966	-0.500552	-3.16462	-0.191505	-0.281296	-0.200137	-0.01	0.185	-0.124	-0.202	-0.179	0.484	0.579	0.733	13.1198	high
GSM526009	Chibon	-0.00793916	-0.10584	0.108778	-0.024168	0.988145	-0.162324	0.146739	0.00309823	0.257385	-0.0842059	0.408851	0.375681	0.572679	0.122871	0.331434	0.754292	0.166131	0.315103	0.297367	0.713486	0.496982	0.206566	2.1959	-0.0155959	0.674588	0.712024	0.323615	1.27866	0.406309	0.863297	0.310786	0.790664	1.53958	2.36005	1.14977	1.26454	1.17216	0.106	0.325	0.099	0.084	0.063	0.299	0.444	0.983	12.3453	high
GSM526010	Chibon	-0.726379	-0.286027	-0.48928	0.350213	-0.356843	-0.293355	-0.278979	-0.274451	-0.0536481	-0.236309	-0.115834	-0.598184	2.2816	-0.28163	0.0824952	-0.429205	0.407131	-0.215071	0.30288	-0.733706	-0.245875	0.975614	0.916213	-0.2463	-0.378918	0.0679786	-0.348331	-0.284709	-0.83698	0.80371	0.335321	0.605685	-0.268507	0.220269	0.245354	-0.00930824	0.308624	0.295	-0.377	-0.169	-0.281	-0.009	0.477	-0.274	-0.314	10.6245	low
GSM526011	Chibon	-0.447773	-0.109038	-0.376373	0.208157	0.672884	0.570626	0.198834	0.0350549	0.0732601	0.153618	0.029828	-0.366523	0.963053	0.0416663	0.74877	0.394148	0.433522	-0.271145	0.203767	-0.916256	-0.351897	0.0270403	0.663616	-0.223538	-0.329865	-0.192336	-0.297357	-0.596814	-0.86379	0.876006	0.499752	0.425332	1.00035	3.27074	0.675009	0.711834	0.573887	0.647	-0.117	-0.066	0.056	0.084	0.163	-0.162	0.169	13.4447	high
GSM526012	Chibon	-0.466336	-0.215538	-0.278664	0.178745	0.224287	0.0595165	-0.139571	0.0222883	-0.141402	0.026216	-0.277449	0.0763238	1.59845	-0.0520957	0.49066	0.0795782	0.372937	-0.36558	0.467551	-0.0262741	-0.220362	0.0802725	0.511222	0.640596	-0.0533955	1.06799	-0.223444	-0.00475938	-1.14311	0.972974	0.40099	0.820325	0.610637	1.15258	0.121438	0.00588058	-0.253504	0.441	-0.121	-0.065	0.043	0.047	0.419	-0.03	0.139	11.6944	high
GSM526013	Chibon	-0.33409	0.115887	-0.499974	1.44326	1.24741	0.0837701	0.2803	0.0587792	0.140177	0.17683	0.41921	0.33143	0.435633	0.135039	0.192423	0.446799	0.246316	-0.127258	0.172437	-0.00976569	-0.112545	0.550598	0.346303	-0.150099	-0.00936894	-0.0507997	-0.299762	0.0718484	-0.309871	0.94333	0.513728	0.53836	0.996209	3.16101	0.782427	0.647471	0.764729	0.446	0.05	-0.011	0.002	0.06	0.524	0.365	0.595	13.1198	high
GSM526014	Chibon	-0.726721	-0.430029	-0.329658	-0.00469841	-0.679395	-0.0059585	-0.429474	-0.362852	0.134799	0.220597	-0.30934	-0.542714	2.74465	-0.489119	-0.469126	-0.465327	0.000117907	0.280306	1.20465	-0.175469	-0.505265	1.02411	1.47151	-0.270202	-0.240049	-0.0406988	0.257958	-1.65514	0.444081	0.457998	0.940884	0.119018	-0.29986	4.45296	0.437294	0.0490479	0.0179382	-0.453	-0.402	-0.247	-0.159	-0.194	0.462	-0.291	-0.379	10.8892	low
GSM526015	Chibon	-0.614022	-0.476744	-0.152531	-0.432827	-0.401298	-0.159241	0.00731038	0.154522	-0.235686	0.159939	-0.0431001	-0.442787	1.44479	-0.0701943	-0.164381	-0.213416	-0.0166985	-0.45469	0.428428	0.193077	0.201833	0.0463114	0.2628	-0.0658794	-0.268579	-0.000236242	-0.220196	-1.23521	-0.23221	0.814426	0.234263	0.317537	-0.782893	-3.86979	-0.383157	-0.483427	-0.149785	0.021	0.168	-0.038	0.072	0.041	0.388	0.556	-0.682	14.2335	high
GSM526016	Chibon	-0.0833834	-0.338802	0.283799	-0.0736223	0.115718	-0.347067	-0.37427	-0.0364336	-0.049575	-0.434403	-0.114758	-0.0377272	2.55777	-0.496248	-0.447097	-0.2274	0.290728	0.105437	0.507481	0.0366709	0.130958	0.24707	1.42976	-0.143727	1.08153	0.274678	-0.1655	1.16233	-0.136053	0.386817	0.229142	0.299683	0.405711	-2.54392	0.285509	0.337087	0.176802	-0.167	0.104	-0.222	-0.396	-0.427	0.347	0.372	0.539	12.2931	high
GSM526017	Chibon	-0.513329	-0.667109	0.170867	-0.268541	-0.457197	0.191512	-0.241658	0.293906	0.180746	-0.031931	0.0559588	-0.344433	1.01704	-0.302814	-0.963997	-0.503495	-0.039401	-0.120231	0.236678	0.739945	0.224743	0.000312288	1.1041	-0.122398	0.15636	-0.0516354	0.634629	-0.493725	0.0639188	0.419783	0.272578	0.0696495	-0.582187	5.14915	0.0736338	-0.0760365	0.200321	-0.12	-0.111	0.021	0.184	0.126	0.008	-0.481	0.132	11.6014	low
GSM526018	Chibon	-0.673296	-0.458023	-0.239193	-0.298925	0.164257	0.354489	0.0799904	-0.167446	0.21464	0.187638	0.0165772	-0.101689	0.126242	0.270679	-0.780155	0.310065	0.0418522	0.242711	0.342158	-0.254866	0.0126659	0.757869	-0.494993	-0.0163386	0.26303	-0.404673	0.470762	-0.68288	-0.306763	0.263454	0.6959	0.122382	0.78806	6.36872	0.73416	1.11368	0.322884	-0.061	-0.145	0.23	0.342	0.331	0.215	-0.637	-0.062	13.8166	high
GSM526019	Chibon	0.319685	-0.0774511	0.441263	0.22513	0.781697	-0.0950691	-0.0723761	0.187766	0.366652	-0.0305817	0.0703872	0.69478	1.0648	-0.231152	-0.0252966	0.100078	0.0290174	0.404067	0.441724	1.21727	0.942	0.75658	2.57375	0.248722	0.764231	0.171817	0.634799	-0.236474	0.282024	0.348556	0.135836	0.173857	1.01198	5.42862	0.960184	1.04684	1.51403	-0.119	-0.071	-0.005	0.097	-0.002	0.737	0.066	0.279	10.7472	low
GSM526020	Chibon	-0.364413	-0.238527	-0.139872	-0.123644	0.283143	-0.0909545	0.0710771	-0.143673	-0.0967902	0.162043	0.00693864	-0.599927	-0.374184	0.207417	1.01239	0.597197	-0.0595688	0.224161	-0.0195936	0.222726	0.100481	0.217619	1.62808	0.0688244	-0.0530515	-0.224386	0.538345	0.695114	0.206585	0.456899	0.858423	0.200111	1.09703	4.70806	0.308382	0.524739	-0.111452	-0.134	0.254	0.004	0.068	-0.034	-0.077	0.515	-0.031	11.1405	low
GSM526021	Chibon	-0.284695	-0.159486	-0.139121	0.032685	-0.433808	-0.689322	-0.194513	-0.148789	-0.366763	-0.326336	-0.176407	-0.305308	1.48632	-0.17333	-0.14599	-0.298704	0.343514	0.016973	0.191689	-0.104814	-0.219829	0.171065	1.28363	-0.111835	-0.154774	0.00675172	-0.156882	-0.0208376	0.254424	0.218807	0.130591	0.301205	-0.409812	0.515215	0.0376291	-0.0782737	-0.0186586	-0.216	-0.022	-0.195	-0.277	-0.156	-0.005	0.333	-0.336	10.879	low
GSM526022	Chibon	-0.881923	-0.540931	-0.37888	0.314766	-0.410093	0.564436	-0.242331	-0.166827	-0.0684545	0.094707	0.322965	-0.36636	0.200994	-0.179385	-0.553938	-0.446791	-0.193548	-0.503543	-0.0569281	-0.554603	-0.235571	-0.328374	-0.85197	-0.233086	0.0159977	-0.095588	-0.592664	-0.486159	-0.679704	0.0885542	0.97519	0.00543771	-0.470927	-0.128484	-0.477199	-0.736334	-0.684032	0.007	-0.031	-0.001	-0.027	0.065	0.063	-0.605	-0.585	10.9484	low
GSM526023	Chibon	-0.383416	-0.306674	-0.0852692	0.0105703	-0.162613	-0.264481	-0.48372	-0.0960826	-0.0229255	0.261558	0.226311	-0.342977	1.83309	-0.483452	-1.29499	-0.305217	0.341061	0.739706	0.277729	-0.442826	-0.220782	-0.353626	0.870287	-0.40051	0.134491	0.124339	-0.0712158	-0.406714	-0.461013	0.171643	0.121716	0.0655565	0.0719916	2.97362	0.425542	0.146713	-0.070295	-0.121	-0.086	-0.129	-0.106	-0.159	0.566	-0.503	0.348	10.7288	low
GSM526024	Chibon	-0.528843	-0.327266	-0.223975	-0.159654	-0.21999	0.374424	0.618496	-0.0646473	-0.214145	0.470133	0.0512053	-0.235653	-0.980509	-0.0222097	-0.232935	-0.534466	-0.114957	-0.676454	-0.734867	0.0748008	-0.0620849	0.272261	-0.682875	0.0291713	0.0709398	-0.227058	-0.219312	-1.20495	0.929476	0.658543	0.121716	0.0522416	-0.458285	2.0384	-0.469174	-0.487754	-0.164315	0.023	0.413	0.022	-0.075	-0.015	-0.402	0.823	-0.994	10.0697	low
GSM526025	Chibon	-0.795863	-0.433789	-0.402304	-0.059388	-0.545595	-0.482851	-0.571253	-0.30481	-0.00191336	-0.414672	0.613015	-0.662908	2.20477	-0.780464	-0.85029	-0.724096	0.25068	0.111243	0.245515	-0.314843	-0.342539	-0.653444	0.233574	-0.074881	-0.0989822	-0.140229	-0.179239	-0.0312411	-0.110157	0.202713	0.394593	0.345889	-0.935524	-5.68873	-0.579684	-0.777745	-0.906322	-0.131	0.016	-0.09	-0.297	-0.212	0.553	0.075	0.775	13.1658	high
GSM526026	Chibon	0.172871	0.321341	-0.164967	0.697789	0.555118	0.566514	0.292434	0.164699	0.0232206	0.107051	0.105525	-0.0612425	1.29736	0.112755	0.208338	-0.0164884	0.0283735	0.536998	0.897091	-0.0870169	-0.216576	0.482926	0.507047	0.388378	-0.0241555	-0.0874206	-0.447564	-1.54732	-0.755039	0.125627	0.121716	0.00549586	-0.337695	6.60614	0.161625	-0.244312	-0.0840276	-0.269	-0.538	-0.087	-0.3	-0.033	0.145	-0.698	-0.186	10.6715	low
GSM526027	Chibon	-0.872835	-0.506998	-0.406485	0.0698239	-0.312242	0.0188383	-0.24052	-0.0636664	-0.118159	0.20876	-0.377319	-0.557333	0.707649	-0.0984921	-0.0995599	-0.399183	0.0901046	-0.350079	-0.227978	-0.411633	-0.13427	-0.622162	1.64478	-0.0182264	-0.367939	-0.0357724	-0.305044	0.0519871	-0.602999	0.839857	0.460768	0.359272	-0.428339	-0.303011	-0.424777	-0.658769	-0.522641	0.542	-0.272	-0.093	0.026	0.175	0.057	-0.449	-0.252	13.5326	high
GSM526028	Chibon	-0.539278	-0.542764	0.0038734	-0.173379	-0.540748	-0.286967	-0.442961	-0.288075	-0.00717695	0.0224626	-0.0688212	-0.519719	1.86839	-0.158348	-0.767316	-0.389329	0.147795	0.337715	0.199802	-0.376954	-0.093474	0.314515	-0.0566004	-0.27302	0.41999	0.0325122	0.218733	-1.11888	0.157274	0.239178	0.999877	0.460414	-0.267027	1.51969	-0.0730802	-0.296654	-0.0048086	-0.156	-0.241	0.057	0	-0.067	-0.094	-0.301	0.437	13.1882	high
GSM526029	Chibon	-0.159371	-0.367849	0.231641	-0.0965208	-0.429471	-0.126829	-0.454389	-0.453106	-0.200322	-0.0777323	0.0853229	0.722712	1.1001	-0.354425	-0.0294781	-0.299724	-0.0453975	0.224804	-0.165067	-0.0563325	0.015112	-0.164146	-0.163067	-0.257167	-0.0373158	-0.0602219	-0.218023	-1.04889	0.06897	0.682511	0.891642	0.114322	-0.280167	-1.51552	-0.125787	-0.245239	-0.229446	-0.183	-0.105	-0.059	-0.052	-0.06	0.419	0.172	-0.635	12.7509	high
GSM526030	Chibon	-0.196989	-0.163799	-0.0368771	0.366379	0.122971	-0.0294559	0.0724071	-0.000727474	0.236965	0.163139	0.0699901	-0.43439	1.2413	-0.294363	0.516181	-0.184593	0.229054	0.202502	0.360158	0.603424	0.0408826	0.861286	1.62599	-0.0217155	0.21509	0.479864	0.356031	0.863462	0.216369	0.305456	0.148412	0.0588214	0.671049	5.30294	0.731213	0.842523	0.417193	-0.157	0.186	-0.116	-0.128	-0.104	0.708	0.871	-0.274	11.4164	low
GSM526031	Chibon	0.519542	0.246512	0.303366	0.860496	1.32332	0.184373	0.228286	0.104083	0.164412	-0.0853038	0.432444	0.514945	0.593444	0.20999	0.70592	1.27562	0.0868979	0.497887	-0.0719642	0.954291	0.396505	1.52786	1.46942	0.520433	0.644534	1.42614	0.855803	1.01195	0.856152	0.517051	0.269451	0.11364	1.932	6.10026	1.38616	1.5521	1.16568	0.038	0.24	0.135	0.289	0.223	0.565	0.865	0.182	10.2148	low
GSM526032	Chibon	-0.433817	-0.324213	-0.121783	-0.0102429	0.475173	0.546116	0.186353	-0.0178025	0.258802	0.238405	0.361078	0.289982	-0.417789	0.0920518	-0.648028	-0.208795	0.0433915	-0.309016	-0.028889	0.170953	0.145131	0.313396	1.0874	0.120466	0.253819	0.58029	0.21204	1.20962	-0.0722954	0.331703	0.266082	0.19863	0.388895	4.98287	0.176566	0.470405	0.549786	0.262	0.373	0.205	0.176	0.322	0.142	0.417	0.295	13.7155	high
GSM526033	Chibon	-0.748159	-0.348908	-0.443613	0.139286	-0.659127	-0.390056	-0.286467	-0.00811144	-0.14492	-0.496465	0.366935	-0.404749	1.64828	-0.18354	-0.721357	-0.468796	0.146638	0.0886362	0.379457	-0.478486	-0.635884	-0.410043	0.855673	-0.126185	-0.735715	-0.15102	-0.666443	-0.245932	-0.900842	0.0875523	0.431792	0.16193	-1.15413	-7.15805	-0.705558	-1.07325	-0.83294	-0.112	-0.325	0	-0.289	-0.097	-0.437	-0.453	-0.271	12.1889	high
GSM526034	Chibon	0.0582378	0.0263113	0.0354739	0.229571	-0.200948	-0.945121	-0.339674	-0.0923282	-0.280782	-0.997691	0.0427667	0.704948	3.5337	-0.248789	-0.313567	-0.161431	0.540308	0.557626	1.66114	-0.334917	-0.480841	-0.0325268	0.845236	-0.246625	-0.819381	-0.0704868	-0.297274	-1.23994	-0.660593	0.821231	0.303713	0.896228	-0.247215	-9.32481	0.202281	0.0515777	-0.735946	-0.994	-0.76	-0.626	-0.884	-0.97	0.462	-0.408	-0.568	10.9137	low
GSM526035	Chibon	-0.962627	-0.392296	-0.6337	-0.408414	-0.895134	0.370849	-0.122433	-0.365678	-0.529697	0.22848	0.316465	-0.488403	1.45102	-0.135079	-0.695019	-0.68725	0.406688	0.126705	0.909706	-0.596962	-0.590277	-0.402588	-0.102527	-0.141235	-1.13246	-0.393322	-0.718262	0.0529329	-1.17149	0.00607293	0.121716	0.115352	-1.10526	-5.97559	-0.812254	-1.36496	-1.52015	-0.23	-0.661	-0.051	-0.365	-0.059	-0.463	-1.483	-0.683	12.0367	high
GSM526036	Chibon	-0.578859	-0.305411	-0.303831	-0.103064	0.116986	-0.44293	0.014255	-0.131652	-0.068897	-0.140072	0.493238	0.282815	-0.340961	0.0694833	0.305735	0.146483	0.412701	0.261283	0.107158	0.0482551	-0.115839	-0.220248	0.00602706	-0.0426858	-0.11278	-0.404855	-0.244189	1.54915	0.0544589	0.500808	0.350758	0.7051	0.0173595	-5.77751	0.0539218	-0.140481	-0.141079	0.03	0.344	0.134	0.019	0.094	-0.033	0.337	0.371	12.2206	high
GSM526037	Chibon	-0.518411	-0.385181	-0.148034	0.239814	-0.271175	-0.345375	-0.0238275	-0.219355	-0.138304	-0.693813	0.128808	1.32431	-0.951438	-0.204663	-0.607111	-0.167534	-0.246154	-0.242031	-0.0403634	-0.0198465	0.369125	-0.634283	-1.25905	0.241839	-0.384369	0.0259075	0.530305	0.175884	-0.913251	0.872477	0.764612	0.994798	-0.638527	-0.127471	-0.618337	-0.752588	-0.40207	-0.127	-0.391	-0.07	0.043	-0.16	0.967	-0.218	-0.037	9.88986	low
GSM526038	Chibon	0.139673	-0.642627	0.869222	-0.348356	-0.211636	-0.0117028	-0.215219	-0.187511	0.313592	-0.0204084	-0.239601	-0.562327	0.0390306	0.0027055	-0.283625	0.204145	-0.0495861	-0.0604661	0.275231	0.354301	-0.0324182	0.857072	2.97248	-0.0711449	0.336298	-0.122577	1.72259	0.883323	-0.274977	0.608976	0.997091	0.246874	0.24139	5.02099	0.853526	0.0942734	1.20474	0.013	-0.323	0.102	0.335	0.029	0.079	-0.638	-0.219	12.3544	high
GSM526039	Chibon	-0.752996	-0.865963	0.125519	-0.309388	-0.134337	0.242759	-0.0840271	0.351141	0.448554	0.499176	0.0340938	-0.35576	-0.941056	0.317083	0.0715972	0.13615	-0.0851256	-0.353316	0.373375	0.55151	0.440391	-0.261802	0.244012	0.179222	0.3128	0.0625094	0.507403	1.02992	0.434327	0.732586	0.224217	0.14568	0.0315828	4.93674	-0.0021571	0.00424568	0.64605	0.314	0.404	0.347	0.54	0.445	0.093	-0.057	0.063	14.2438	high
GSM526040	Chibon	-0.175126	-0.813956	0.709812	-0.220344	-0.181304	-0.216557	-0.582498	-0.111371	0.116811	-0.00182568	-0.400218	0.647346	0.487545	-0.219732	0.517034	-0.212352	-0.247217	-0.0375998	0.242792	0.510319	0.475337	0.429003	0.851498	0.0846703	0.687402	0.203323	2.27519	1.46592	0.732132	0.113974	0.351493	0.225759	-0.347985	2.12405	0.0104609	-0.0749244	0.5997	-0.354	-0.485	0.017	0.231	0.014	0.391	-0.551	0.114	10.1882	low
GSM526041	Chibon	-0.0932573	-0.093549	0.00032417	0.0745108	0.406854	-0.0039875	0.105908	0.13055	0.0214141	0.353754	-0.132411	-0.440827	1.15201	-0.214962	-0.356974	-0.232036	0.0760896	-0.139917	0.324164	-0.125657	-0.180942	0.9638	1.70323	-0.0514303	0.0317728	0.282027	0.316834	-0.010434	0.149889	0.243458	0.451188	0.0459179	0.512196	4.88142	0.815357	0.709721	0.844861	-0.161	-0.001	-0.113	-0.002	-0.084	0.37	-0.139	-0.062	10.9341	low
GSM526042	Chibon	-0.803263	-0.34751	-0.506392	-0.0878363	-0.029373	0.0770312	0.2185	0.256334	-0.00512263	-0.47602	0.264858	-1.14522	-0.73341	0.334657	-0.412165	0.152701	-0.0907264	-0.259893	0.123648	-0.0560647	0.0500587	-0.695692	-0.463679	0.476718	-0.029145	0.880873	-0.341196	0.290322	0.0628968	0.740068	0.392686	0.551901	-0.118687	-0.804881	-0.372217	-0.272967	0.162152	0.225	0.565	0.249	0.515	0.144	-0.182	0.396	0.695	11.631	low
GSM526043	Chibon	-0.537425	-0.290244	-0.274646	0.184158	0.0704446	-0.289457	0.0126141	0.0726386	0.0609723	-0.248644	0.397685	-0.0773123	0.9236	-0.0581039	-0.386449	-0.00291696	0.217876	0.194115	0.197838	0.209723	-0.231756	0.179025	1.98297	0.0361245	-0.259926	0.994558	0.0350086	0.516362	0.822489	0.804597	0.303998	0.778218	-0.274769	-6.31768	-0.0826754	-0.193045	-0.296774	-0.126	0.326	0.027	-0.099	0.02	0.585	1.175	-0.066	11.2601	low
GSM526044	Chibon	-0.555023	-0.238724	-0.351444	0.433163	0.231144	0.00365178	-0.253032	-0.0089665	0.24421	0.127592	0.43112	-0.475764	0.639126	-0.186751	-0.484807	0.461108	0.0430933	0.541981	0.0776823	-0.307455	0.0407829	0.0694796	-0.121316	-0.00687326	-0.0347584	0.297705	-0.0362029	-0.136222	-0.101812	0.387059	0.126795	0.264611	0.657995	0.442874	0.806769	0.43865	0.800501	0.055	0.087	0.094	-0.011	0.095	0.493	0.15	0.554	10.9587	low
GSM526045	Chibon	-0.429427	-0.275865	-0.170624	-0.103101	-0.197305	-0.275193	-0.213964	-0.643791	-0.0477023	-0.473289	0.0339046	1.21691	2.66575	-0.364034	-0.80377	-0.380054	0.353619	0.210502	0.321196	0.320887	-0.399836	-0.171786	1.07487	-0.0978613	-0.602622	0.146104	-0.246473	-0.648832	-0.509401	0.611185	0.957764	0.255223	-0.51845	-5.28051	-0.0761259	-0.627518	-0.0542652	-0.397	-0.236	-0.272	-0.287	-0.239	0.116	0.296	-0.575	14.0527	high
GSM526046	Chibon	-0.181195	0.192893	-0.415654	0.497492	0.583325	-0.189469	-0.0591878	0.0513147	0.0966169	-0.447877	0.274802	-0.332163	1.22676	-0.316058	0.0143853	-0.0401227	0.311674	0.457465	0.234736	-0.231854	-0.0104374	0.19224	1.04773	-0.0681346	-0.116485	0.381008	-0.571464	0.206148	0.447085	0.378205	0.224283	0.384385	0.966716	-3.4529	0.675817	0.238036	0.577096	-0.052	0.323	-0.118	-0.238	-0.206	-0.09	0.067	0.318	11.0292	low
GSM526047	Chibon	-0.732653	-0.483862	-0.276434	-0.172124	-0.843638	0.0734124	-0.502033	0.139649	-0.141392	-0.20492	0.109406	-0.86307	1.14786	-0.153609	-0.482159	-0.550159	0.0171177	0.180016	0.324602	-0.470692	-0.642535	-0.155911	0.191822	0.132697	-0.371007	-0.363715	-0.26917	-1.81781	-0.672481	0.019539	0.955278	0.165462	-1.26591	-4.28237	-0.717146	-1.03594	-1.37464	-0.26	-0.391	-0.094	-0.354	-0.085	-0.174	-0.631	0.102	12.6998	high
GSM526048	Chibon	-0.640249	-0.261118	-0.421257	-0.237292	-0.40761	-0.384374	-0.522049	-0.0740889	-0.182483	-0.0670587	-0.104688	-0.473544	2.32728	-0.360168	-0.539261	-0.394688	0.285757	0.466322	0.319553	-0.606417	-0.38398	-0.223954	1.16672	-0.572324	-0.425836	-0.175543	-0.283587	0.81239	0.282617	0.183213	0.199713	0.510905	0.167793	-5.83139	0.323259	-0.0150376	0.0307774	-0.405	-0.304	-0.192	-0.321	-0.504	-0.288	-0.858	0.344	11.8047	high
GSM526049	Chibon	-0.324672	-0.527556	0.225426	0.0544986	0.303981	0.49183	0.215564	0.435848	0.0733753	0.328989	-0.00320835	-0.0392444	-0.428172	0.0620474	0.0866246	0.259303	-0.0290101	0.0735468	-0.123235	0.249939	0.434574	-0.349123	0.0122898	0.084538	0.500774	-0.0482044	0.716326	1.25785	0.146476	0.0863874	0.151962	0.182266	0.75801	5.76213	0.429232	0.471199	0.775812	0.08	-0.219	0.202	0.309	0.296	-0.15	-0.753	-0.303	12.1715	high
GSM526050	Chibon	-0.412716	-0.297799	-0.127686	0.0165389	0.0146423	-0.165433	-0.25123	-0.207055	0.283517	-0.446528	-0.144874	2.26483	0.227988	-0.112263	-0.131992	-0.146492	0.199445	0.0630848	0.709548	0.810492	0.176087	-0.17985	-0.00858603	-0.0341575	0.223628	0.339321	-0.0473098	0.430297	0.520588	0.982109	0.17578	0.885272	-0.769973	-3.95955	-0.578713	-0.686995	-0.198377	-0.061	0.019	-0.125	-0.252	-0.05	0.194	0.889	0.014	10.973	low
GSM526051	Chibon	0.707097	0.260905	0.495768	-0.0953231	1.26558	-0.0870295	0.236515	0.50505	0.406318	-0.0530123	-0.0999581	1.57125	-0.507077	0.201773	0.611613	0.795549	-0.250541	1.08808	0.0698078	1.01053	0.306616	1.00031	-0.231957	0.220753	0.633044	-0.436245	0.887435	0.414219	0.559268	0.82426	0.796887	0.802521	2.11382	6.27685	1.40123	1.84106	0.997654	-0.219	-0.057	-0.068	0.041	-0.065	0.501	0.132	-0.419	10.1075	low
GSM526052	Chibon	-0.703988	-0.380663	-0.359249	-0.220404	-0.844735	0.177402	0.0806429	-0.336315	-0.198677	-0.407804	-0.264238	0.0380702	-0.496695	-0.208835	0.000894299	-0.982214	0.116691	-0.209597	-0.190988	-0.666856	-0.43844	-0.940824	-0.591022	-0.00655582	-0.748392	-0.376097	-0.851767	-0.731114	-0.655374	0.0101772	0.935042	0.148916	-1.23367	-6.49754	-1.12951	-1.18378	-1.22965	-0.225	-0.316	-0.074	-0.375	-0.228	-0.691	-1.071	-0.843	10.1218	low
GSM526053	Chibon	-0.463412	-0.144629	-0.354204	-0.295069	-0.323359	-0.436235	0.016154	0.114895	0.320922	-0.656624	0.0575638	0.0769705	1.67735	-0.065773	0.0151602	-0.0677844	0.427282	0.255987	0.513108	0.533955	-0.220477	-0.256148	1.82849	-0.0103019	-0.0937531	0.0028706	-0.3232	0.213715	0.585003	0.932206	0.524097	0.892391	-0.0555438	-3.88483	-0.117091	-0.275778	-0.543342	-0.112	0.242	-0.045	-0.119	-0.102	0.597	1.325	0.155	11.0067	low
GSM526054	Chibon	-0.451702	-0.139916	-0.346429	-0.447741	-0.259904	-0.340507	0.617722	-0.329871	-0.326966	-0.711585	0.228954	0.10364	-1.12586	0.0041772	0.0145154	-0.126607	-0.30351	-0.606086	0.49104	0.0842243	-0.0144382	-0.298835	-0.129666	0.0632832	-0.378927	0.512708	-0.285831	-1.16428	-0.658762	0.691095	0.180254	0.916959	-0.557915	-3.35694	-0.531581	-0.226168	-0.167802	0.016	0.172	0	-0.017	0.018	-0.332	0.191	-0.617	10.2179	low
GSM526055	Chibon	-0.362587	-0.0311187	-0.368298	0.0883709	-0.230359	0.0447557	-0.330302	-0.444168	-0.131744	-0.576309	-0.633611	2.4747	0.547762	0.199342	0.172705	0.407633	0.271649	0.345987	0.567144	-0.35342	-0.423697	-0.503665	-1.36969	0.280934	-0.480238	0.0303062	-0.235469	-0.276197	-0.245904	0.94112	0.62947	0.603518	-0.121916	-7.9836	-0.274408	-0.734193	-1.04279	-0.123	-0.418	-0.3	-0.474	-0.033	-0.422	-0.098	-1.244	10.411	low
GSM526056	Chibon	-0.384692	-0.332517	-0.0579718	-0.225453	-0.0134219	-0.0385805	0.156898	0.301389	0.0602613	0.145317	-0.188698	0.139301	1.58391	-0.181	-0.589085	-0.387277	0.0875382	-0.00140046	0.24633	-0.27709	-0.35834	-0.148115	1.30659	-0.32013	0.25842	-0.210001	-0.131445	-0.247823	0.090603	0.209657	0.467192	0.0592139	0.263959	4.03268	0.430867	0.401324	0.539589	-0.132	-0.175	-0.008	-0.105	0.029	0.226	-0.335	0.212	10.5408	low
GSM526057	Chibon	0.298704	0.410705	-0.124446	0.413791	1.96709	0.210542	0.290183	-0.0936536	0.839664	0.221106	0.441241	0.00254097	0.769943	0.390844	0.916952	1.17331	0.196297	0.391973	0.370356	0.357513	0.492043	1.20828	1.11245	0.180067	0.562312	-0.0399987	0.224505	0.328153	-0.59922	0.838319	0.470827	0.660422	2.30834	2.17744	2.33008	1.79308	1.57095	-0.069	0.154	-0.104	0.293	-0.009	0.768	0.348	0.351	10.9975	low
GSM526058	Chibon	-0.742995	-0.542275	-0.223022	-0.151699	-0.448745	0.111231	0.0883263	0.0262823	0.0708033	0.284386	-0.208132	-0.0806211	0.211376	-0.234136	-0.518859	-0.73326	0.173343	0.134516	-0.111974	0.309767	0.0836745	0.0188243	-0.138016	-0.0494423	0.0923198	0.904971	-0.0449798	0.142781	1.22362	0.628522	0.121716	0.138171	-0.742008	-1.26166	-0.259598	-0.449577	-0.414081	-0.051	0.308	0.032	0.013	0.022	0.325	0.569	-0.094	11.1508	low
GSM526059	Chibon	-0.504721	-0.211864	-0.325397	-0.27868	-0.485265	-0.236713	-0.284555	-0.524822	-0.404705	-0.286906	-0.261804	-0.587975	2.54946	-0.610623	-1.46598	-0.449122	0.499503	0.350064	0.434009	-0.39505	-0.690676	-0.230743	1.78882	-0.204678	-0.760812	-0.282659	-0.277573	-1.60217	-0.913035	0.10416	0.49231	0.113374	-1.38739	-8.94495	-0.491147	-1.01416	-1.03303	-0.448	-0.163	-0.449	-0.551	-0.447	0.272	0.249	-0.578	13.3149	high
GSM526060	Chibon	-0.457838	-0.239843	-0.242217	0.123271	0.175724	-0.090081	-0.186707	-0.215358	-0.192358	-0.109835	0.11923	-0.0187869	0.564374	-0.12391	0.126472	0.0558624	0.294591	-0.203129	0.106506	0.879762	-0.00380889	0.0793423	1.19177	-0.0284311	-0.0874576	0.377348	-0.204906	0.493664	0.371461	0.777569	0.481897	0.056173	0.270138	2.25413	0.275013	0.0751864	0.0754015	-0.172	0.046	-0.177	-0.11	-0.232	0.119	0.968	-0.599	10.9965	low
GSM526061	Chibon	-0.00797689	-0.00958646	0.00178841	0.306265	0.946718	-0.274332	0.0420611	-0.528451	-0.2469	-0.630351	0.62466	-0.414286	0.535303	-0.25461	0.373313	-0.0589524	0.155649	0.00926156	0.438463	0.665095	0.0462984	-0.310995	0.889075	0.202043	0.130734	0.384193	0.0985839	0.180612	-0.640418	0.938135	0.84969	0.881505	0.677828	-6.59431	0.248506	0.343006	0.350458	-0.039	0.171	-0.15	0.036	-0.065	0.427	0.395	-0.099	13.6613	high
GSM526062	Chibon	-0.644387	-0.413341	-0.256717	-0.239831	0.0381703	0.0968241	-0.329159	-0.16381	-0.0170608	0.214705	-0.261783	-0.0876741	1.2413	-0.0873175	-0.207974	0.000711215	0.14257	0.387652	-0.0288621	-0.60264	-0.261658	-0.117565	-0.0357246	-0.336246	0.260005	-0.149234	0.153905	-0.469135	0.0452866	0.455357	0.988849	0.12914	0.574345	-0.426308	0.778131	0.622614	0.360609	-0.063	-0.212	0.012	0.077	-0.02	-0.037	-0.675	0.372	13.4151	high
GSM526063	Chibon	0.662462	0.611718	0.0563818	0.0943249	2.54713	0.185054	0.586593	0.290676	0.17747	-0.0249122	0.608053	0.129073	-1.18815	0.688935	0.723317	1.86589	-0.378022	0.0921256	0.130338	0.632853	0.54717	0.406586	2.29611	0.186786	0.451385	-0.0498036	0.642334	2.01163	-0.0937162	0.543113	0.209979	0.703109	3.20217	6.23943	2.04131	1.87852	1.24649	0.235	0.136	0.185	0.184	0.15	0.255	-0.116	0.403	12.3493	high
GSM526064	Chibon	-1.01177	-0.733926	-0.308718	-0.0465214	-0.336896	0.19494	0.134006	-0.154406	-0.125183	0.232849	-0.317715	-0.375232	-0.336808	-0.18776	0.194079	-0.0616427	-0.143345	-0.0176456	-0.564249	-0.319448	-0.253333	-0.418608	-0.494993	-0.263042	0.248835	-0.361254	-0.254773	-0.486159	-0.155135	0.811655	0.632547	0.394186	-0.44814	5.26682	-0.222605	-0.317406	-0.0818652	0.417	-0.093	0.004	-0.011	0.119	-0.13	-0.193	0.453	12.7213	high
GSM526065	Chibon	-0.747935	-0.776833	0.0321082	-0.232243	-0.466244	0.1085	0.203314	-0.0646133	0.00618802	0.272487	0.0236973	-0.208468	-0.820622	-0.0327268	-0.275285	-0.30475	-0.198478	-0.480838	-0.701224	0.336516	0.00543562	-0.314792	-0.330074	-0.057959	0.214115	-0.0356223	0.103397	0.124812	0.284989	0.401803	0.151564	0.0384917	-0.272286	3.91513	-0.38061	-0.414696	-0.115987	0.072	0.342	0.019	0.114	0.002	0.155	0.11	-0.16	10.4978	low
GSM526066	Chibon	-1.39802	-0.778581	-0.688269	-0.14955	-0.691677	-0.0820001	-0.286566	0.000301556	-0.0303746	-0.0500622	0.43967	-0.848897	-0.729258	0.0323154	-0.57923	-0.564874	-0.248908	-0.468851	-0.0265888	-1.05196	-0.319112	-0.379446	-1.43441	-0.23773	-0.376529	-0.269994	-0.7419	-2.53471	-0.657842	0.0798854	0.95441	0.197856	-1.20397	-6.84015	-1.06037	-1.20686	-1.10809	-0.071	-0.054	0.126	-0.01	0.11	-0.118	-0.906	0.109	10.9505	low
GSM526067	Chibon	-0.960311	-0.582362	-0.419943	-0.068428	-0.426019	0.314328	0.509534	0.0453535	-0.192165	-0.0765678	-0.279581	-0.138108	-0.100092	-0.11018	0.354684	-0.226922	0.271354	-0.968118	-0.311454	-0.0280147	0.097857	-0.114305	-0.720452	0.123935	-0.182319	0.751668	-0.46083	-0.665856	-1.01049	0.91539	0.693825	0.799835	-0.748281	-1.07027	-0.568226	-0.60762	-0.511612	0.77	0.182	0.006	0.092	0.16	0.437	0.121	-0.066	12.3095	high
GSM526068	Chibon	0.25996	0.265357	-0.00599707	0.855847	1.77593	0.155325	0.52838	0.444247	0.195874	-0.192088	0.375962	0.150439	-0.407407	0.35563	1.19045	1.31716	-0.154722	0.100306	-0.0400565	0.372681	0.200681	0.315755	-0.288322	0.297192	0.520781	0.828225	0.620421	1.046	-0.0825345	0.65885	0.736729	0.796922	1.80047	4.0861	1.02579	1.00963	0.933145	0.229	0.459	0.217	0.307	0.105	0.035	0.15	0.62	11.6494	low
GSM526069	Chibon	0.0212317	-0.0424586	0.070767	-0.13896	0.87696	0.261575	0.224802	0.111405	0.264927	0.424968	0.00978746	0.026472	-0.0045749	0.0786865	-0.245684	0.323964	-0.112794	-0.291622	-0.320069	0.384593	0.0550393	1.14677	0.166771	0.168265	0.578503	-0.0811453	0.273334	-0.576953	0.249697	0.255948	0.370475	0.0113687	1.74007	7.23055	1.19468	1.39387	1.6086	0.089	0.082	0.124	0.151	0.306	0.513	0.162	-0.054	10.5132	low
GSM526070	Chibon	-0.812255	-0.386661	-0.472882	0.196886	0.189996	0.0399779	-0.0460735	-0.219083	-0.060088	0.396424	0.205002	-0.244404	0.10963	0.029171	0.732683	0.236779	-0.100341	0.291904	-0.0316911	-0.138453	-0.102955	0.200826	1.38801	-0.00343589	0.0586282	0.319961	0.279806	1.75911	0.885354	0.223108	0.578601	0.603138	0.289953	-1.43155	0.104344	0.0459536	0.277657	0.107	0.205	0.249	0.224	0.258	0.176	-0.034	0.333	11.4226	low
GSM526071	Chibon	-0.503453	-0.268498	-0.261061	0.376857	0.0998908	0.255493	-0.616237	0.0510286	0.176124	-0.159304	0.058849	0.185644	0.900759	-0.0234719	0.867416	-0.144327	0.795723	-0.0371232	0.242518	0.0469332	-0.138239	0.706316	1.2377	0.110388	-0.107853	0.147563	0.344164	0.0472582	-0.853487	0.971347	0.121716	0.761202	0.457622	6.45029	0.452065	0.566176	0.149874	0.621	-0.043	0.175	0.146	0.197	0.504	0.201	0.641	14.2274	high
GSM526072	Chibon	-0.868809	-0.706889	-0.17991	-0.11435	-0.532636	0.321885	0.219936	0.375209	-0.234505	0.243125	-0.109047	-0.350958	0.680655	0.0612189	-0.511728	-0.372327	-0.213052	0.117937	0.212943	-0.659613	-0.00380158	0.0475528	0.974666	-0.159725	0.0185751	-0.0689471	0.0193754	0.301672	-0.374951	0.0465502	0.231476	0.0926785	-0.406978	1.12466	0.0164286	-0.137621	-0.0151288	0.057	0.021	0.276	0.152	0.358	-0.183	-0.114	0.092	10.7911	low
GSM526073	Chibon	-0.776059	-0.59766	-0.198222	-0.142579	-0.409692	-0.0480502	-0.791186	-0.413017	-0.0354974	0.174747	0.255808	0.110709	1.28698	-0.0521713	-0.777821	-0.428264	0.64437	0.379633	0.630699	0.00447375	-0.0345152	-0.170173	1.56963	0.0262684	-0.101807	-0.065259	-0.00587516	1.325	-0.0614514	0.275151	0.121716	0.127449	-1.0507	-0.544339	-0.495754	-0.802596	-0.833539	0.105	0.308	0.246	0.056	0.169	0.131	0.619	0.051	12.4413	high
GSM526074	Chibon	-0.262534	-0.442535	0.200001	0.0471287	0.0191456	-0.0439662	-0.214155	-0.174869	-0.210997	0.0870125	0.0904663	0.822936	1.11256	-0.0538106	-0.677129	0.0181053	0.518801	0.379906	0.221182	0.29352	0.294373	0.944423	2.82009	0.146904	0.150604	0.170398	0.462398	1.57658	0.255775	0.141254	0.121716	0.107396	-0.193941	3.86403	0.0193531	-0.307393	-0.331743	0.162	0.319	0.201	0.124	0.234	-0.076	0.624	-0.343	13.1433	high
GSM526075	Chibon	-0.0937419	0.00623659	-0.111087	-0.223889	-0.215651	-0.228889	-0.54838	-0.673238	-0.272883	0.331115	-0.213592	-0.537308	2.57023	-0.0469406	-0.578348	-0.495801	0.31091	0.0670422	-0.0367581	0.683196	-0.312293	0.231781	0.713718	-0.209567	-0.217956	-0.0632417	0.169215	-0.374557	0.708418	0.13243	0.668637	0.00352276	0.318784	5.78095	0.45476	0.14515	0.0946995	-0.341	-0.246	-0.319	-0.205	-0.246	0.015	-0.354	-0.804	10.9004	low
GSM526076	Chibon	-0.526118	-0.318046	-0.231191	0.125976	0.248723	-0.2452	0.235876	-0.0593777	-0.0940649	-0.236645	0.00560843	-0.3549	1.1707	-0.180296	-0.330071	-0.130589	0.259406	-0.216712	-0.121994	0.434104	0.00441489	0.229162	2.80756	-0.130903	0.0359013	0.824147	-0.127849	0.99587	-0.23111	0.658888	0.345051	0.282528	-0.117055	-1.76818	0.111795	0.0918682	0.285188	-0.101	0.282	-0.195	-0.297	-0.281	0.279	0.568	0.648	10.9924	low
GSM526077	Chibon	0.194879	-0.234914	0.477547	-0.0501086	0.136135	-0.272435	-0.339119	-0.172023	-0.178427	-0.375622	-0.0670259	0.747789	1.21015	-0.264112	-0.720927	0.0650005	0.254123	0.373018	0.688698	0.228023	0.177518	0.658787	0.676141	-0.176047	0.2177	0.644717	0.292059	0.159805	0.108996	0.461612	0.43858	0.605139	0.909285	0.881541	0.582384	0.438453	0.18819	-0.321	-0.105	-0.153	-0.195	-0.363	0.512	-0.237	-0.078	10.9209	low
GSM526078	Chibon	-0.814135	-0.525879	-0.320284	-0.180667	-0.529986	-0.986898	-0.15985	0.205722	-0.0724904	-0.583333	0.225378	-0.416865	1.39288	-0.288695	-0.777179	-0.55866	0.427385	0.00308395	0.200072	-0.38038	-0.504794	-0.209421	2.44015	-0.0830247	-0.574315	0.0725272	-0.203608	2.0646	-0.662921	0.473532	0.856388	0.761111	-0.945727	-7.37899	-0.456527	-0.745326	-0.833156	-0.086	0.322	-0.11	-0.339	-0.405	-0.19	0.532	0.207	12.9461	high
GSM526079	Chibon	0.896514	0.743503	0.170012	3.20544	1.48202	0.0403504	0.224424	0.168986	0.314764	-0.791296	0.851848	0.323156	1.89746	0.103109	0.428345	0.826763	0.153464	0.858865	1.28632	0.618839	-0.0864457	0.662907	1.32747	0.0461508	-0.100101	-0.175652	0.00279126	-2.13464	-0.925676	0.567364	0.912701	0.961876	0.907859	1.51242	0.748514	0.725203	-0.0363	-0.7	-0.391	-0.446	-0.244	-0.475	0.556	-0.703	-0.438	10.8289	low
GSM526080	Chibon	-0.49142	-0.380171	-0.12361	-0.186534	-0.454793	-0.178754	0.167745	-0.159112	-0.231923	0.153206	-0.121038	-0.40249	1.17693	0.048104	-0.396468	-0.615207	0.187671	-0.156444	-0.165491	0.232733	-0.234242	-0.60604	0.968403	-0.183632	-0.15496	-0.0752899	-0.0595462	0.411381	-0.271979	0.584252	0.265069	0.0966498	-0.850508	-0.912263	-0.533879	-0.6324	-0.731047	-0.165	0.224	-0.169	-0.114	-0.234	-0.004	0.787	-0.658	10.5377	low
GSM526081	Chibon	0.429097	-0.4136	0.93633	0.00148823	0.404423	-0.0525831	0.0733051	0.366253	0.174811	-0.0740234	0.180687	0.505849	1.58391	0.100008	0.0454363	0.00908529	0.0316298	0.313677	0.617612	1.08597	0.292005	-0.0305887	2.54662	0.395505	0.778102	-0.162102	3.24237	1.35716	0.290561	0.383701	0.353041	0.481389	1.23994	0.78285	0.775593	0.524182	0.943181	-0.109	-0.084	0.03	0.168	-0.068	0.378	-0.262	0.24	11.6371	low
GSM526082	Chibon	0.585409	0.354761	0.256275	1.10908	1.48424	-0.21959	0.212439	0.150233	0.202776	-0.275405	0.352105	0.853828	1.11463	-0.0440528	0.700002	0.556508	0.167115	0.236156	0.353359	0.593771	0.000615287	0.508504	2.61342	-0.135498	0.478854	0.648241	0.146015	-0.415226	-0.257653	0.370259	0.121716	0.281508	1.54861	4.73277	1.30989	1.31369	1.22372	-0.35	-0.016	-0.274	-0.255	-0.093	0.602	0.096	0.28	10.7707	low
GSM526083	Chibon	-0.765686	-0.55185	-0.237596	-0.051847	-0.633414	-0.0776028	-0.291802	0.0134597	-0.119352	-0.0565617	0.0662658	-0.331575	1.67943	-0.341246	-0.679165	-0.715666	0.0125447	0.462411	0.447758	-0.477773	-0.147616	-0.285503	0.00602706	-0.324235	0.100726	-0.173358	-0.28846	-0.806776	0.240808	0.0508285	0.194042	0.0735284	-0.463932	1.36967	-0.299652	-0.619065	-0.650478	-0.264	-0.038	-0.155	-0.368	-0.241	-0.196	-0.679	0.399	12.3974	high
GSM526084	Chibon	-1.16981	-0.584899	-0.649902	0.0571537	-0.584616	0.191023	0.0230107	-0.112569	-0.142079	-0.0604125	-0.199157	-0.187312	1.63375	-0.440819	0.120122	-0.699447	0.276497	-0.0978719	-0.0371006	-0.698529	-0.611538	-0.253235	0.0749173	-0.239156	-0.270605	0.57359	-0.499642	-1.10942	-0.797295	0.440089	0.264502	0.133948	-0.72524	0.306427	-0.369867	-0.81712	-0.594709	0.378	-0.216	-0.161	-0.32	-0.068	0.551	-0.564	-0.081	12.7325	high
GSM526085	Chibon	-0.505447	-0.23637	-0.298975	-0.158927	0.358449	0.251392	0.232467	0.153958	0.0470439	-0.205641	0.235506	-0.455725	0.27367	0.00487246	0.0412818	0.724704	0.34772	-0.429567	0.10831	-0.0207044	0.0742169	0.152377	1.24396	-0.112532	0.0574174	0.396397	-0.0649205	1.18597	0.322866	0.723854	0.59903	0.655064	0.677698	-0.0913234	0.0595112	0.309565	-0.0492971	0.272	0.367	0.107	0.073	0.186	0.213	0.587	0.632	11.019	low
GSM526086	Chibon	-0.486127	-0.398472	-0.0973943	0.226105	0.129655	0.138941	-0.00841666	-0.0321409	0.043292	0.0728852	0.0226039	0.102444	0.522845	-0.171933	0.20618	0.0676463	-0.10809	-0.222009	0.0305714	0.0813538	0.203037	-0.145344	0.292026	-0.0891081	0.256218	0.296757	0.0622489	0.0623906	0.00472162	0.41675	0.887367	0.280099	0.0273022	-0.210434	-0.0977805	-0.000465116	-0.289089	-0.06	0.279	0.018	0	-0.026	0.338	0.39	0.268	10.7727	low
GSM526087	Chibon	-0.776562	-0.715211	-0.0681672	-0.253976	-0.662047	0.0209125	-0.46081	0.0673051	0.0498552	0.145592	-0.273717	-0.0730842	2.18816	-0.216304	-0.697443	-0.469185	0.0468043	0.352712	0.64161	-0.188013	-0.243748	-0.542637	0.966315	-0.24878	0.330835	-0.111897	-0.0121866	-1.6977	-0.34811	0.0848612	0.733141	0.0693211	-0.665377	1.23388	-0.205688	-0.426533	-0.0788753	-0.185	-0.386	0.028	-0.051	0.013	0.513	-0.672	-0.776	12.1276	high
GSM526088	Chibon	-0.51027	-0.378324	-0.146606	-0.0533596	-0.482839	-0.421319	-0.425595	0.102238	-0.0715269	-0.333739	0.29529	-0.621499	1.77702	-0.512091	-0.401302	-0.736384	0.358605	0.0910781	0.255812	-0.573329	-0.0912796	-0.548546	0.538361	-0.232259	0.04726	-0.265977	-0.0894293	-0.0529939	-0.425713	0.106736	0.121716	0.252521	-0.597899	-4.26446	-0.187934	-0.504026	-0.569271	-0.073	0.068	-0.083	-0.162	-0.176	-0.24	-0.473	0.621	10.789	low
GSM526089	Chibon	-0.732176	-0.660434	-0.0797137	-0.213184	-0.697809	-0.10418	-0.189267	-0.0282215	-0.319603	0.272409	-0.259745	-0.104255	0.628744	0.00656664	-0.280855	-0.312367	0.075022	-0.0890212	-0.246058	-0.242557	-0.185081	-0.732868	-0.154717	-0.142724	-0.242008	-0.358397	-0.181639	-1.86132	-0.0933092	0.269848	0.892145	0.126775	-0.803392	-1.03584	-0.414268	-0.846643	-0.619216	-0.043	0.124	0.057	0.122	0.043	-0.139	0.216	-0.273	11.8783	high
GSM526090	Chibon	-0.959911	-0.876166	-0.0930491	-0.212577	-0.732609	-0.0375499	-0.182727	0.0407819	-0.0556486	0.0586847	-0.071514	-0.179789	0.597597	-0.0770075	-0.581107	-0.868324	0.100959	0.267203	0.0478851	-0.165658	-0.199576	-0.351088	-0.121316	-0.124116	0.393966	-0.0177178	0.0298817	-1.36289	0.577763	0.155837	0.716081	0.236308	-0.599307	-3.36674	-0.580231	-0.740134	-0.528215	-0.015	-0.003	0.07	0.08	-0.091	-0.359	-0.516	0.207	12.6058	high
GSM526091	Chibon	-0.358883	0.0758599	-0.483048	-0.0322622	0.675924	0.0954017	0.296027	-0.26288	-0.0200041	0.100096	-0.110473	-0.439238	-0.226756	0.0575775	1.35871	0.783511	-0.270271	0.0126167	-0.325523	-0.50626	-0.189475	0.509179	1.31077	-0.253994	-0.531104	0.110931	-0.0627174	-0.320648	-1.16945	0.820839	0.446035	0.506027	1.56287	2.32092	1.21995	1.33468	0.631797	0.416	-0.239	-0.105	-0.045	-0.028	-0.125	-0.358	-0.271	14.7495	high
GSM526092	Chibon	-0.790887	-0.266993	-0.582105	-0.278269	-0.581836	-0.299193	0.545559	-0.23673	-0.444236	-0.501801	0.056825	0.498745	-0.592212	0.0526316	-0.525538	-0.0105784	0.0755536	-0.0684396	-0.0181145	0.295706	-0.137655	0.00849859	0.957965	0.0123332	-0.884855	-0.332857	-0.384659	1.68534	-0.42467	0.64375	0.403628	0.698928	-0.873976	-4.1493	-0.621398	-0.786552	-0.937896	0.221	0.131	0.067	-0.007	-0.042	-0.342	-0.094	-0.606	10.5397	low
GSM526093	Chibon	-0.226724	0.192912	-0.466262	0.235887	0.601447	0.388363	-0.195695	-0.0638091	0.097597	0.0838915	-0.264997	-0.200896	0.904912	0.359658	0.637518	0.799768	0.0322953	0.0535044	-0.191856	-0.585343	-0.120374	1.06057	-0.474117	-0.0316152	-0.717332	-0.285504	-0.500606	-1.92468	-1.49173	0.959099	0.121716	0.826291	2.11235	9.44384	1.61291	1.36114	0.611148	0.428	-0.487	-0.094	-0.154	0.019	-0.028	-0.646	-0.403	14.1027	high
GSM526094	Chibon	-0.824847	-0.398915	-0.473257	0.0226994	-0.672819	-0.0286275	0.432767	0.0573693	-0.457783	-0.357437	-0.0815171	-0.548798	-0.18315	0.053067	-0.790422	-0.105306	0.299168	-0.173695	0.0174515	-0.690471	-0.0700724	-0.440069	-0.716277	0.100632	-0.555353	-0.662217	-0.664267	0.176829	-0.834535	0.450263	0.85128	0.800874	-1.10859	-5.73523	-0.935642	-1.03745	-1.03274	0.22	-0.327	-0.075	-0.079	-0.1	-0.383	-0.566	-0.492	12.5946	high
GSM526095	Chibon	-1.26913	-0.923711	-0.383797	-0.225403	-0.609079	0.976854	-0.0118029	0.329699	-0.0874679	0.524215	0.102834	1.12916	0.574756	0.038692	-1.18218	-0.511642	-0.0704072	-0.428511	-0.0308348	-1.19546	-0.129019	-1.18296	-0.680788	-0.286282	0.142015	-0.523913	0.43155	0.198582	0.140026	0.0348412	0.742172	0.295849	-1.15904	-2.18784	-0.825351	-1.0056	-0.604045	0.202	-0.016	0.306	0.265	0.223	0.12	-0.651	0.441	14.723	high
GSM526096	Chibon	-0.838419	-0.474224	-0.404662	0.321698	-0.76016	-0.22542	-0.171009	0.340742	-0.0210475	-0.422668	-0.222097	0.132075	0.913218	0.024793	0.356806	-0.648087	0.232327	0.233605	-0.234002	-0.970701	-0.310827	-0.424207	-0.6787	0.0714582	-0.344765	-0.158464	-0.439416	-0.50602	-0.630346	0.437004	0.916766	0.864177	-0.908081	-6.10175	-0.666971	-0.814182	-0.944724	0.106	-0.112	-0.135	-0.055	-0.14	-0.078	-0.202	0.022	10.6746	low
GSM526097	Chibon	-0.289496	-0.174481	-0.127794	0.24019	0.485884	-0.281109	-0.265539	0.187109	0.493877	-0.197063	0.0248601	-0.310062	-1.18192	0.323112	0.137105	0.56644	0.0447083	0.23202	-0.210046	0.437184	0.22244	0.692065	0.189734	0.223165	0.373697	0.361399	0.433005	1.09139	0.185727	0.724381	0.429162	0.932886	0.793861	3.25527	0.190105	0.370195	0.831854	0.002	0.345	0.049	0.284	0.096	0.072	0.393	0.723	11.114	low
GSM526098	Chibon	-0.263556	-0.296287	0.0363671	0.250393	0.424925	-0.359733	0.0182734	0.106832	0.0904856	-0.637086	0.283883	0.197388	-0.660735	0.221258	0.580958	0.692754	-0.0602391	0.224985	0.323732	1.16331	0.232094	-0.0371117	-0.10879	0.332802	0.226287	0.725542	0.265298	1.85274	0.877892	0.939579	0.649521	0.987882	0.687634	-0.805956	0.148284	-0.166722	0.252545	0.076	0.263	0.042	0.05	0.03	0.079	1.079	0.244	11.9232	high
GSM526099	Chibon	-0.206856	0.00870876	-0.239517	0.992443	0.721799	-0.242674	0.0793943	0.0465072	0.0694547	-0.298188	0.0270703	-0.331415	0.205147	0.0208663	0.589376	0.261481	0.064505	0.337201	0.228743	0.235898	0.439965	0.46862	0.793046	0.0635931	0.300722	0.526731	-0.235542	0.891835	-0.11018	0.650328	0.180811	0.935001	0.282528	-2.64475	0.102892	0.292778	0.71517	0.051	0.177	0	0.07	-0.017	0.04	0.214	0.908	11.1518	low
GSM526100	Chibon	-0.628881	-0.504174	-0.138563	-0.119629	-0.10415	-0.00634032	0.107372	-0.0599493	-0.0631594	-0.794511	0.0987073	-0.67157	-0.295279	0.240883	-0.360743	0.103574	-0.110556	-0.0732252	0.162034	0.615744	0.249571	-0.0580442	0.0561291	0.357668	0.0930839	0.35084	0.028799	2.1308	0.358713	0.910181	0.921207	0.979668	-0.248803	-3.05894	-0.404862	-0.674423	-0.129857	0.291	0.211	0.067	0.11	0.108	-0.248	0.749	-0.581	11.9794	high
GSM526101	Chibon	-0.228259	-0.278195	0.0554848	0.0414227	0.627052	-0.248194	0.0986	-0.103026	0.341447	-0.333888	0.0867898	0.504071	-1.02204	-0.134935	0.585827	0.476552	-0.134098	0.29133	0.396431	1.19888	0.29757	0.45488	0.208523	0.287796	0.62214	0.659332	0.169788	1.55009	0.226844	0.947376	0.624073	0.908679	0.211635	-1.17759	0.225652	0.16486	0.688936	-0.108	0.216	-0.149	-0.126	-0.136	0.17	0.78	0.131	11.7271	high
GSM526102	Chibon	-0.489082	-0.515392	0.0292336	-0.371321	-0.302705	-0.629916	-0.275342	-0.0999306	0.1955	-0.824103	-0.147999	0.773571	0.63705	0.360472	-0.120064	0.142288	-0.0684191	0.521443	0.530203	1.26991	0.265092	-0.096346	0.65109	0.675803	0.367332	0.344483	0.0624489	0.866299	-0.0388739	0.979974	0.835525	0.928157	-1.086	-2.58812	-0.0930967	-0.610117	-0.161696	-0.326	0.035	-0.128	0.381	-0.223	0.104	0.949	-0.451	11.9396	high
GSM526103	Chibon	0.58391	0.343048	0.267624	0.588047	1.89312	0.407059	0.287016	0.243279	0.667067	-0.00350912	0.720936	-0.208993	0.115859	0.794912	0.755143	1.58038	-0.302286	0.485538	0.675126	1.74953	0.756486	1.22957	0.57385	0.813676	0.854227	0.678446	0.538124	1.1803	0.378366	0.76254	0.88671	0.633398	2.01029	3.81595	1.59955	1.50617	1.9355	-0.099	0.194	0.061	0.43	0.122	0.375	0.777	0.136	12.0489	high
GSM526104	Chibon	-0.506334	-0.398478	-0.11984	-0.298928	-0.0213003	-0.598808	0.294137	-0.145678	0.606425	-0.591885	-0.0250589	0.0201328	-0.137468	0.561222	-0.388801	0.42218	0.00254784	-0.0017386	-0.274972	0.593135	-0.442373	-0.357565	0.997629	0.560172	0.306084	0.42771	0.0576063	0.520146	0.145261	0.877566	0.972726	0.657159	-0.599146	-0.123099	0.473168	-0.167091	1.01605	-0.343	0.012	-0.029	0.658	0.039	-0.092	0.593	-0.058	10.7533	low
GSM526105	Chibon	-0.611851	-0.414634	-0.219131	-0.360239	-0.0967015	-0.413341	-0.406884	-0.347155	0.368533	-0.801063	0.290111	0.482487	-0.901603	-0.00970949	0.149663	-0.166824	-0.247425	0.547398	0.624744	0.654037	0.124216	-0.0132258	0.755469	0.812499	-0.0998515	0.25502	-0.209904	0.959931	0.249265	0.991354	0.987075	0.969418	-0.862589	-6.23778	-0.337406	-0.426689	0.120816	-0.308	-0.127	-0.222	0.302	-0.165	-0.228	0.539	-0.648	12.5547	high
GSM526106	Chibon	-0.37619	-0.377131	0.00104528	-0.0957286	0.0337231	0.194612	0.251105	0.0173218	0.415246	0.173044	0.185894	0.35683	-0.386643	0.662159	0.115716	0.512624	-0.114794	0.189749	0.0395858	1.0107	-0.0494056	0.239831	0.557149	0.200338	0.37326	0.26804	0.262909	-0.0284037	0.515814	0.755339	0.643095	0.892763	0.00401972	1.76059	0.161992	0.346598	1.0066	-0.09	0.454	0.102	0.461	0.099	0.633	0.911	0.083	10.0799	low
GSM526107	Chibon	-0.686662	-0.662063	-0.027333	-0.340285	-0.20048	0.666609	0.0114372	0.752431	-0.168656	0.569736	-0.0434911	0.179591	-0.787398	0.233717	-0.631612	-0.117795	-0.184554	-0.490453	-0.340592	0.545932	0.129753	-0.159229	0.223136	-0.00565252	0.261483	-0.24004	0.12385	0.0491498	0.235877	0.453755	0.668529	0.184601	-0.408472	4.69106	-0.178805	-0.0174543	0.197072	0.177	0.098	0.178	0.321	0.328	0.552	0.289	-0.296	11.3827	low
GSM526108	Chibon	-0.938026	-0.725411	-0.236239	-0.225952	-0.263199	0.217283	0.167322	0.148865	0.0473168	0.189473	0.326179	-0.324574	-0.297355	0.154553	-0.38065	0.126484	-0.0651041	0.148808	-0.0373842	-0.151861	0.301605	-0.0967182	1.56336	0.152109	0.0104429	-0.0772954	0.434831	2.44669	0.683843	0.377794	0.67365	0.661375	-0.51509	-1.58893	-0.60605	-0.653669	-0.554338	0.354	0.655	0.288	0.21	0.286	-0.257	0.948	-0.259	12.9696	high
GSM526109	Chibon	-0.92057	-0.687041	-0.259477	-0.310679	-0.788693	-0.0619033	-0.468999	-0.270747	0.400965	0.201145	-0.290507	-0.00245068	0.242523	-0.144852	-0.142106	-0.690766	0.236643	0.20528	0.160898	0.0916761	-0.0592074	-0.496972	-0.0419874	0.120766	0.411634	0.167919	0.19818	-0.452111	0.573476	0.237392	0.296008	0.374608	-1.17939	1.58133	-0.549538	-0.82667	-0.264968	0.052	-0.061	0.206	0.45	0.352	-0.138	0.181	0.369	11.1303	low
GSM526110	Chibon	-0.42086	-0.582003	0.179048	-0.0962683	0.0234374	0.603395	-0.220168	0.177882	-0.0286079	0.519065	-0.0223066	0.318581	-0.226756	0.409667	0.302485	0.173368	-0.0697414	-0.00963288	0.527343	0.47012	0.177408	0.321709	-0.106702	0.338907	0.603295	-0.35285	0.564848	-0.413334	0.785088	0.295036	0.436913	0.596648	0.157223	5.06965	0.36673	0.672257	0.608009	0.115	0.057	0.409	0.379	0.555	0.328	-0.198	-0.232	12.0939	high
GSM526111	Chibon	-0.165146	-0.269899	0.116392	-0.19539	0.0706897	-0.0865388	0.0452022	0.257465	-0.0629179	-0.17467	0.104306	0.954798	0.688961	0.0442384	0.325074	0.314144	-0.0748048	-0.325828	-0.179843	-0.012004	0.154985	-0.148112	-0.511694	-0.170918	0.205386	-0.347973	0.228816	-0.578845	0.495511	0.884424	0.121716	0.813204	0.353699	-2.42247	-0.0155003	0.12736	-0.194811	-0.01	0.153	-0.091	-0.091	0.012	0.1	0.77	-0.553	9.4086	low
GSM526112	Chibon	-0.319876	-0.0337953	-0.317867	0.487774	0.751099	0.518843	-0.072241	0.364214	0.2037	0.180307	-0.0772699	1.70988	-0.936903	0.27676	-0.00901629	0.635076	0.12897	-0.111794	0.615212	-0.282976	-0.0176487	-0.0748627	-1.15676	-0.1416	0.105411	0.00398204	0.0160496	0.146565	-0.1593	0.804241	0.288717	0.823875	0.844226	3.84385	0.55724	0.875303	0.625434	0.111	-0.063	0.072	0.1	0.21	0.22	-0.091	0.324	12.1715	high
GSM526113	Chibon	-1.05734	-0.760641	-0.329669	-0.12482	-0.517701	0.633728	-0.213138	-0.0526705	-0.0121386	0.536697	0.332739	0.176213	0.215529	-0.0439979	-0.311598	-0.39077	-0.0539302	-0.0849488	-0.307734	-0.316444	0.0381508	-0.636642	1.68027	0.128648	-0.265567	0.0399915	-0.199692	1.71844	1.17109	0.242994	0.134583	0.362091	-0.548549	-1.1679	-0.643734	-0.669096	-0.460298	0.283	0.649	0.246	0.193	0.291	-0.392	0.727	-0.068	12.5649	high
GSM526114	Chibon	-0.0334879	0.169456	-0.225494	0.588276	1.04756	0.397038	0.0562529	0.0799983	0.146043	0.767084	-0.196364	0.261241	-0.166538	0.410536	0.694154	0.794219	0.0251921	-0.202463	-0.0349189	0.420344	0.11009	1.8369	0.0498663	0.000888039	0.20601	0.368811	-0.146973	-0.844607	-0.439725	0.509569	0.121716	0.601903	0.979174	7.82275	0.964186	1.33897	1.05711	-0.042	0.051	0.099	0.036	0.23	0.2	0.265	-0.857	9.90315	low
GSM526115	Chibon	-0.78896	-0.718514	-0.0782735	-0.145016	-0.752077	0.332441	-0.187107	-0.0785186	-0.141809	0.0413002	-0.206756	0.598929	0.230064	0.0993059	-0.0950477	-0.312723	0.0577749	0.341331	0.128265	-0.208313	-0.227485	-0.437973	0.20226	-0.205247	-0.167388	-0.502351	0.246717	-1.24751	0.316996	0.0816783	0.984623	0.581141	-0.82421	-4.31879	-0.590758	-0.844688	-0.702352	-0.079	-0.243	0.146	0.068	0.169	-0.494	-0.843	-0.306	11.6044	low
GSM766533	Gobble	0.909071	0.671138	0.26437	2.19878	1.46987	-0.354586	0.0989813	0.71316	0.454747	-0.230326	0.341848	1.17028	2.14051	0.339797	0.77799	1.2714	0.124493	1.13637	1.05652	0.344523	0.111437	1.5707	2.64242	0.0711784	0.212714	-0.104976	1.16208	-0.570799	-0.188622	0.691664	0.155323	0.599632	2.31409	-1.90227	1.77529	1.35688	1.38253	-0.594	-0.549	-0.287	-0.517	-0.539	0.704	-0.634	0.185	8.92866	low
GSM766534	Gobble	0.834514	0.986963	-0.169387	0.453647	2.31688	0.481616	0.633146	0.569042	0.404812	0.319341	0.364969	0.348022	-0.552718	0.784625	1.58473	2.01856	-0.0867695	0.610464	-0.107514	0.123158	-0.0168264	1.39006	-0.83079	0.125656	-0.0531869	-0.448694	0.0343854	-0.497151	-0.317264	0.469128	0.126628	0.261007	3.64211	4.86115	2.63427	2.65423	1.68684	-0.133	-0.122	-0.036	0.02	-0.083	0.392	-0.142	0.328	10.2415	low
GSM766535	Gobble	0.136502	0.185057	-0.0539495	0.0434871	0.25185	-0.482969	-0.155987	-0.0140401	0.281698	-0.120634	0.151283	0.236151	-0.10057	0.0945781	0.462493	0.593493	0.0196914	0.225929	-0.0266565	-0.35489	-0.0274528	-0.223165	-0.518234	-0.0156057	0.320705	0.0908945	0.359594	-0.950292	0.526634	0.537837	0.338924	0.458662	1.05486	-4.21499	0.518256	0.367684	0.448334	-0.126	-0.006	-0.096	0.034	-0.242	0.244	0.069	0.486	10.1975	low
GSM766536	Gobble	0.264642	0.203586	0.0678403	0.363375	0.17636	-0.434751	0.0124979	0.115244	0.494022	-0.164592	0.00710964	0.367186	-0.106946	-0.0311451	0.486638	0.152412	-0.210757	-0.167887	0.090543	0.404764	0.162875	0.658282	0.466526	-0.00330263	0.287529	-0.19363	0.356439	-0.0428044	0.611534	0.563694	0.312053	0.209943	0.715327	2.05503	0.565765	1.0639	1.00799	-0.185	0.183	-0.079	0.155	-0.082	0.436	0.741	-0.146	9.33488	low
GSM766537	Gobble	-0.297562	-0.12849	-0.187858	0.081782	-0.352895	0.135656	-0.193042	0.197204	-0.0902242	-0.00143558	-0.0425271	0.0220931	-0.477272	-0.26115	-0.0366028	-0.481591	0.528028	-0.366872	-0.120757	-0.532444	-0.283898	-0.338035	-0.398197	0.141072	-0.170097	-0.0949385	-0.318088	-1.05067	-0.480897	0.255699	0.242127	0.177399	-0.110813	-3.99696	-0.511009	-0.30608	-0.841994	0.276	0.223	0.159	-0.145	-0.049	-0.415	-0.498	0.528	10.1666	low
GSM766538	Gobble	0.191754	-0.127685	0.354932	-0.183797	0.0509453	-0.122513	-0.226884	-0.00971977	0.0197686	-0.00534311	-0.144075	0.448301	-1.03249	-0.0476782	0.214403	0.16303	-0.353935	-0.188362	-0.339641	0.293541	0.310342	-0.0113332	-1.03762	0.0363189	0.83892	-0.324745	0.437369	-0.243453	0.735381	0.518362	0.758588	0.245593	0.51486	-1.00564	-0.139011	0.279523	0.28974	-0.089	0.167	-0.082	0.197	0.03	0.025	0.763	0.062	11.3722	low
GSM766539	Gobble	0.188191	0.290947	-0.114173	0.208268	0.272122	0.00557083	-0.00725019	0.22638	0.157964	0.309677	0.310144	0.495423	-0.0277801	0.139834	0.418622	0.27667	-0.113891	-0.182543	0.050342	-0.443347	0.257017	0.0681762	0.62442	-0.212556	0.0897033	-0.283078	0.161509	-1.00827	0.741287	0.42866	0.104308	0.411236	1.06284	-2.16758	0.346504	0.508554	0.00906734	-0.28	0.256	-0.059	-0.057	-0.167	-0.21	0.497	-0.085	8.97556	low
GSM766540	Gobble	-0.324638	-0.307458	-0.0190888	-0.614934	-0.552868	-0.414391	0.0482678	-0.080407	-0.0977001	0.175225	-0.0231591	0.689685	0.450402	-0.132337	-0.507839	-0.746394	-0.122032	-0.188034	-0.38944	0.0819477	0.183609	-0.406976	0.318327	-0.154577	-0.0221459	-0.283488	0.0513695	-0.346339	0.469552	0.377587	0.958258	0.594655	-0.826902	-5.12876	-0.723166	-0.536072	-0.48568	-0.157	0.133	0.009	0.199	0.061	-0.043	0.707	0.279	12.8147	high
GSM766541	Gobble	-0.0977524	-0.1361	0.042608	-0.510867	-0.30454	-0.0453234	-0.0938134	-0.309108	-0.0430735	0.242937	0.0736138	0.442014	-0.81625	-0.267471	-0.496983	-0.391967	0.0922173	0.0131649	-0.61094	-0.261441	-0.114797	-0.554449	-1.32663	-0.0732312	0.0558683	0.141264	0.371156	-1.72757	0.380898	0.348927	0.923343	0.296932	-0.712738	-7.96579	-0.633069	-0.627968	-0.9411	-0.183	0.26	0.037	-0.088	-0.033	0.232	0.902	0.182	10.9325	low
GSM766542	Gobble	-0.211226	-0.171487	-0.0441543	-0.153503	-0.247373	-0.116718	0.10732	-0.398542	0.0667283	0.243361	0.186107	-0.354997	-1.03462	-0.0427085	0.371247	0.0971008	-0.331845	0.00156956	-0.509334	-0.404419	0.268474	0.426661	1.29939	-0.0841744	0.126015	-0.482409	0.365011	1.04905	0.726521	0.0952069	0.272865	0.265619	0.201828	2.54008	0.142006	-0.130708	0.125259	0.15	0.369	0.058	0.189	0.115	0.173	0.227	0.005	10.6873	low
GSM766543	Gobble	-0.194981	-0.0991325	-0.106499	0.0374496	-0.245405	0.211819	0.051359	0.114152	-0.109023	0.193723	-0.160096	-0.592556	-0.73124	-0.295982	-0.276469	-0.412481	-0.153796	0.0527695	-0.190498	-0.741765	0.00835435	0.172001	0.205216	-0.0998767	0.426648	-0.42543	0.216622	-0.569091	-0.0185783	0.23419	0.739294	0.154907	0.143287	4.23229	-0.0373519	0.417955	0.534301	0.141	-0.125	0.126	0.221	0.226	0.179	-0.64	1.063	10.6414	low
GSM766544	Gobble	0.108893	0.0496942	0.0657762	-0.216239	0.171487	0.3179	0.178974	-0.246685	-0.124022	0.733511	0.168984	-0.741708	-0.0559397	0.00173697	0.715263	-0.115394	-0.184551	-0.284425	-0.464497	0.353097	0.223306	0.235914	-1.10549	0.144262	0.411597	-0.487939	0.404095	-1.72475	1.93211	0.25226	0.104308	0.0291564	0.170445	3.00616	-0.390033	-0.0681659	0.18567	0.044	0.5	0.144	0.317	0.302	-0.05	0.667	-0.196	7.84391	low
GSM766545	Gobble	0.10138	0.156045	-0.0607391	0.0157831	0.196189	-0.118249	-0.388126	-0.361996	0.263955	0.231949	-0.075014	0.338781	-0.257308	-0.217598	0.101637	-0.150244	0.103195	-0.105343	-0.0911549	0.109589	0.178599	0.144255	-1.31001	-0.0398373	0.0319993	0.143463	0.205903	-1.13497	1.01158	0.388318	0.110297	0.139852	0.331101	2.71753	0.226023	0.320419	0.584736	-0.179	0.005	-0.067	-0.02	0.075	0.145	0.523	0.031	9.33019	low
GSM766546	Gobble	-0.445685	-0.137618	-0.342296	0.0336429	-0.167234	-0.67676	-0.109631	0.244033	0.0922448	-0.116049	-0.0353323	0.0398762	0.481218	-0.424655	-0.113502	-0.0738733	0.0747661	0.117638	-0.274439	-0.348624	0.0237338	0.0223689	-0.942054	0.029602	-0.224925	-0.032646	-0.0858194	-2.12032	0.225358	0.165841	0.104308	0.0912915	-0.285221	-2.96418	-0.115991	-0.465076	-0.74721	-0.154	0.2	0.024	-0.319	-0.177	-0.386	-0.545	0.493	8.82099	low
GSM766547	Gobble	0.648959	0.857568	-0.231787	1.42669	2.36815	0.788855	0.581011	0.192109	0.594355	0.403316	0.606032	-0.502444	-0.926763	0.68819	1.14961	1.479	-0.0944368	-0.0400665	0.441586	0.797868	-0.0143193	1.26268	0.414818	0.0924559	0.345403	0.033336	0.166102	-1.50471	0.790435	0.817254	0.369859	0.171516	2.09682	2.36286	1.26882	1.55353	2.06992	-0.011	0.16	-0.154	0.452	0.136	0.896	0.578	-0.273	8.21175	low
GSM766548	Gobble	-0.464892	-0.224767	-0.266805	-0.252372	-0.255393	0.0756402	-0.262185	0.274489	-0.178208	0.264802	0.348096	-1.10178	-1.04206	0.0264911	-0.50494	0.0983302	-0.11836	-0.0470856	-0.626533	-0.712315	-0.0996203	-0.835389	1.07409	-0.320758	0.0992302	0.15769	-0.111621	1.33601	0.585412	0.248783	0.997549	0.226164	-0.512006	-3.19406	-0.588036	-0.418571	-0.724222	0.309	0.021	0.335	0.326	0.295	0.127	-0.129	0.71	11.1018	low
GSM766549	Gobble	-0.133189	-0.0253756	-0.119793	-0.389618	-0.156245	0.177963	0.292109	0.263124	-0.184735	0.286801	-0.126248	-0.646985	-2.1796	0.0399101	-0.3237	-3.8524e-05	-0.346976	-0.105815	-1.03375	-0.480429	-0.0346725	-0.290418	-1.04409	-0.185511	0.210274	1.10464	0.152271	0.043202	-0.153506	0.18133	0.99636	0.162411	1.23871	1.21642	-0.281513	-0.154139	-0.0115502	0.139	0.297	0.232	0.217	0.145	-0.095	-0.088	0.962	10.6069	low
GSM766550	Gobble	-0.0699872	0.110435	-0.200469	0.20759	0.221169	0.638384	0.0868602	0.102662	0.0660007	1.32917	0.0101277	-0.652457	-1.5314	-0.0783045	-0.412452	0.363634	0.270175	0.0143302	-0.386191	-0.86717	0.0223346	-0.124733	-1.3788	-0.379232	0.444382	-0.569682	-0.0287953	-1.3537	0.259223	0.150284	0.736285	0.109963	1.21548	6.95363	0.914768	1.02938	1.23313	0.071	-0.114	0.043	0.091	0.287	0.215	-0.747	0.69	10.9976	low
GSM766551	Gobble	-0.504602	-0.1235	-0.423447	-0.26718	-0.745032	0.0953262	0.290071	0.0878906	0.0220977	-0.0975243	-0.502111	0.865683	0.790443	0.77759	-0.726043	-0.248313	0.627779	0.359183	-0.0575282	-0.710763	-0.740359	-0.675269	0.0939515	-0.306676	-0.600427	-0.450268	-0.155862	-1.69833	-1.19189	0.310092	0.137912	0.40565	-0.194022	-0.213619	-0.17652	-0.699525	-0.639524	-0.09	-0.503	-0.007	-0.279	-0.139	-0.793	-1.368	-0.846	9.07472	low
GSM766552	Gobble	-0.325017	-0.110175	-0.238713	-0.102641	-0.394242	-0.455896	-0.412851	0.3578	-0.132663	0.158495	-0.204779	1.34375	-0.36729	-0.0890972	0.0782063	-0.0315099	0.128092	0.539956	0.14361	0.0982846	-0.161734	-0.481863	-0.216758	0.107438	-0.363144	-0.188438	0.36105	-0.0568709	1.082	0.485708	0.104308	0.887279	-0.759202	-6.1855	-0.287485	-0.640081	-0.883826	-0.238	-0.179	-0.104	-0.241	-0.362	0.459	0.878	0.157	9.31838	low
GSM766553	Gobble	0.186108	-0.106034	0.324602	-0.0862542	-0.170779	-0.0519688	-0.224892	0.688244	0.333858	0.400944	-0.102325	0.00212517	0.261786	-0.0285999	0.108377	-0.370032	-0.414949	0.354041	-0.0328705	0.925791	0.343331	0.462465	0.37419	-0.0198151	1.07137	0.156725	0.822335	-0.27038	1.08384	0.28328	0.199656	0.202081	-0.26821	5.9896	0.0542783	0.117468	0.8638	-0.128	-0.153	0.105	0.185	0.006	0.196	-0.761	0.15	9.01758	low
GSM766554	Gobble	-0.16206	-0.0699702	-0.102321	-0.107717	-0.0137508	0.136801	-0.164412	0.204599	0.207218	0.232903	0.0730541	-0.551083	-0.345506	0.1318	0.0979371	0.207992	0.118788	-0.062663	-0.155189	-0.39614	-0.0541043	0.0272162	-1.55193	-0.0960539	0.186493	-0.00767059	0.179381	0.788021	0.641032	0.775	0.628366	0.605444	0.0379177	-0.867646	0.299013	0.350345	0.496547	0.422	0.15	0.083	0.119	0.069	0.331	0.019	1.291	10.5341	low
GSM766555	Gobble	-0.30876	-0.139337	-0.188248	-0.244672	-0.689687	0.104971	0.0742215	0.518654	0.524141	0.406675	-0.0308551	-0.873057	-0.475678	0.191591	-0.196854	-0.335902	-0.279368	-0.239008	-0.281224	-0.78821	-0.128714	-0.439042	-0.235225	0.0581843	-0.300083	-0.147076	-0.275037	0.0445082	1.70975	0.35861	0.701688	0.291261	-0.790601	-1.24104	-0.475833	-0.676994	-0.40305	0.186	0.371	0.135	0.294	0.192	-0.412	0.316	0.308	8.72686	low
GSM766556	Gobble	-0.415779	-0.310435	-0.117049	-0.0086127	-0.472423	0.170878	-0.0734443	0.368454	0.0569521	0.417799	-0.0986057	0.23477	-0.903916	-0.485844	0.101358	-0.696143	-0.0953068	0.193911	-0.236101	-0.752396	0.133675	-0.318775	-0.206601	-0.121026	0.285017	-0.15053	0.316079	-0.351061	1.12905	0.14647	0.328914	0.620152	-0.93595	2.72564	-0.487679	-0.493468	-0.454491	-0.095	0.11	0.19	0.099	0.181	0.122	-0.153	0.233	10.8074	low
GSM766557	Gobble	-0.703564	-0.305814	-0.441945	0.194189	-0.586653	-0.071183	-0.0489987	0.945126	-0.180392	0.418404	0.0616764	0.0718917	0.194309	-0.0216392	-0.10733	-0.470066	0.110159	0.27662	0.74951	-0.777383	-0.277363	-0.747415	-1.59164	0.320861	-0.40249	-0.441419	-0.253282	-2.19487	-1.0599	0.265557	0.865013	0.927051	-0.318502	-10.2294	-0.453599	-1.00061	-1.05695	-0.183	0.056	0.042	-0.065	-0.416	-0.568	-0.895	0.33	10.0192	low
GSM766558	Gobble	-0.536851	-0.286263	-0.278432	-0.294059	-0.736948	0.0938629	0.441214	0.334566	0.0392465	-0.016202	-0.0291026	-0.0306157	-0.500118	-0.264454	-0.578844	-0.582268	0.193134	-0.233406	-0.152123	-0.434873	-0.0245802	-0.120591	1.15673	0.456602	-0.166803	-0.411161	-0.278255	1.18198	-0.423981	0.43409	0.372544	0.924512	-0.931337	-6.43246	-0.570528	-0.767267	-0.73219	0.056	0.589	0.231	0.083	-0.062	-0.362	0.359	0.469	12.7748	high
GSM766559	Gobble	0.178422	0.184625	-0.0068917	0.21302	0.611893	0.0970748	0.0892616	0.0426735	0.411444	0.157441	0.235943	0.0264882	-0.827939	0.11342	0.533699	0.420547	0.0919171	0.0565683	0.0396583	0.362622	0.272191	0.0411801	-1.11611	-0.173228	0.487154	0.284836	0.247369	-1.15164	1.59648	0.835435	0.104308	0.67555	0.75603	0.95127	0.101811	0.662197	0.00567256	0.038	0.309	0.219	0.174	0.243	0.735	1.046	0.2	8.99483	low
[truncated: 461 more rows]
